# Supplementary material for: Sex-biased genetic programs in liver metabolism and liver fibrosis are controlled by EZH1 and EZH2
Source: PLoS Genet. 2020 May 19;16(5):e1008796. doi: 10.1371/journal.pgen.1008796 (PMC7263639; doi:10.1371/journal.pgen.1008796)
Supplement: S4 Table — Shown are those Upstream Regulators with a p-value of overlap < E-03 and an |activation Z-score| >2. (XLSX) [file pgen.1008796.s012.xlsx]

## Sheet: S4 Table_UPR_legend
S4 Table - UPR analysis
Upstream Regulator analysis, implemented in IPA, was used to discover upstream regulators of the indicated sex-biased and sex-independent gene sets. Shown are those Upstream Regulators with a p-value of overlap < E-03 and an |activation Z-score| >2. Molecules classified as chemicals were removed.

## Sheet: S4A Table_Female-biased_up
S4A Table_Female-biased_up
Female-biased genes up-regulated in MDKO												Female-biased genes up-regulated in FDKO
Upstream Regulator	Expr Fold Change	Molecule Type	Predicted Activation State	Activation z-score	Flags	p-value of overlap	Target Molecules in Dataset	Mechanistic Network				Upstream Regulator	Expr Fold Change	Molecule Type	Predicted Activation State	Activation z-score	Flags	p-value of overlap	Target Molecules in Dataset	Mechanistic Network
STAT5B		transcription regulator	Inhibited	-4.564		2.19e-23	A1BG,ABCB1,CA2,CCND1,Cdkn1c,CUX2,CYP17A1,Cyp2a12/Cyp2a22,Cyp2b13/Cyp2b9,CYP2B6,CYP3A5,CYP4A11,FAM126A,G0S2,Hamp/Hamp2,HAO2,HSD3B2,MB,MTMR11,NIPAL1,NQO1,NT5E,PROM1,RAD51B,SLC16A5,Slc22a26,STAMBPL1,SULT2A1,Sult2a2,TMEM98,TOX	66 (4)				STAT5B		transcription regulator	Inhibited	-2.5		2.11e-18	A1BG,CA2,CCND1,Cdkn1c,CYP17A1,Cyp2a12/Cyp2a22,Cyp2b13/Cyp2b9,CYP2B6,CYP3A5,FAM126A,HAO2,HSD3B2,Pcp4l1,PDK4,PROM1,Slc22a26,SULT2A1,Sult2a2,TMEM98	32 (2)
TNF		cytokine	Activated	4.035	bias	1.31e-17	ACTA1,APCS,ARRDC3,BMPER,CA2,CCND1,CDKN2C,COL4A3,COTL1,CTSC,CYBA,CYP17A1,EGR1,EMP2,G0S2,GBP2,GBP4,GBP6,Hamp/Hamp2,HES1,HLA-A,HSD3B2,IFIT3,IL15,INPP5D,IRF8,ITGA6,ITGB2,ITGB3,LBP,LCN2,MFSD2A,Mt1,Mt2,Mx1,NID1,NQO1,OAS2,Orm1 (includes others),PIK3CD,PPARGC1A,PRKCA,PSMB9,PTPRC,RCAN2,RGS16,RGS2,ROBO1,SELPLG,SERPINB1,SLC16A5,SLC1A4,SLC7A8,Slfn2,ST3GAL6,STAT1,SULT2A1,TAP1,TOX,UCP2,VCAM1	135 (22)				TNF		cytokine	Activated	2.63	bias	2.27e-10	BMPER,CA2,CCND1,COL4A3,CYP17A1,EGR1,EMP2,GBP2,GBP4,GBP6,HLA-A,HSD3B2,IL1RN,ITGA6,LBP,LCN2,NID1,Orm1 (includes others),PRKCA,RGS16,RGS2,ROBO1,SERPINB1,SLC1A2,ST3GAL6,SULT2A1,UCP2,VCAM1	47 (17)
STAT1	1.673	transcription regulator	Activated	4.042	bias	3.31e-16	AXL,CCND1,CYP3A5,CYP4A11,EGR1,GBP2,GBP4,GBP6,HES1,IFIT3,Igtp,IL15,IRF8,LCN2,Ly6a (includes others),LY6E,Mx1,OAS2,Oasl2,PSMB9,RTP4,SAMD9L,Slfn2,STAT1,TAP1,Wfdc17,ZBP1	96 (13)				CEBPA		transcription regulator	Activated	2.201	bias	2.32e-09	APOA4,CA2,CCND1,CYP2B6,CYP3A5,IL1RN,LCN2,LEPR,Ly6a (includes others),Orm1 (includes others),RGS2,SERPINB1,SULT2A1,Sult2a2
PIK3CG		kinase	Inhibited	-3.494		3.39e-16	ABCB1,ATP6V0D2,FCGR3A/FCGR3B,GBP2,GBP4,GBP6,GBP7,H2-L,HLA-A,Igtp,IRGM,ITGB3,OAS2,PIK3CD,STAT1,TAP1,ZBP1	99 (12)				CHUK		kinase	Activated	2.891	bias	1.56e-07	CCND1,GBP2,GBP4,HLA-A,IL1RN,LCN2,NID1,RGS16,VCAM1	41 (14)
IFNG		cytokine	Activated	4.348	bias	4.84e-16	ABCB1,C1QA,CCND1,CD5L,CENPM,CFP,CORO1A,CTSC,CYBA,DCT,Defb1,DLL1,EGR1,FCGR3A/FCGR3B,GAS6,GBP2,GBP4,GBP6,GBP7,HLA-A,IFIT3,Igtp,IL15,IRF8,IRGM,ITGA6,ITGB2,ITGB3,LCN2,LIMK1,Ly6a (includes others),LY6E,MFSD2A,Mt1,Mx1,NQO1,NTRK2,OAS2,PPARGC1A,PRKCA,PSMB9,RAC2,RTP4,Slfn2,STAT1,TAP1,THEMIS2,TRIB2,VCAM1,Wfdc17,ZBTB16	126 (17)				IKBKB		kinase	Activated	2.602	bias	1.91e-07	CCND1,EGR1,GBP2,HLA-A,IL1RN,LCN2,NID1,RGS16,Tpm2,VCAM1	34 (13)
SIRT1		transcription regulator	Inhibited	-3.114	bias	5.18e-15	ABCB1,CCND1,CDKN2C,CORO1A,CYP2B6,GBP6,H2-Q8,HLA-A,IFIT3,Igtp,IL2RG,IRGM,LAPTM5,LY6E,MAOA,NTRK2,OAS2,Oasl2,PPARGC1A,PSMB9,RGS16,RTP4,Slfn2,STAT1,TAP1,UBA7,UCP2	119 (17)				IFNB1		cytokine	Activated	2.586	bias	2.24e-07	GBP2,GBP4,GBP6,GBP7,HLA-A,Ifi27l2a/Ifi27l2b,MCM6,Oasl2,PDK4,Tpm2	30 (7)
IRF7		transcription regulator	Activated	4.157	bias	8.76e-14	GBP4,Hamp/Hamp2,IFIT3,Igtp,IL15,IRF8,IRGM,Ly6a (includes others),Mx1,OAS2,Oasl2,PSMB9,RTP4,SAMD9L,STAT1,TAP1,UBA7,ZBP1	64 (13)				STAT3		transcription regulator	Activated	2.154	bias	5.76e-07	APOA4,CCND1,CYP26A1,EGR1,GBP2,GBP6,H2-Q8,HLA-A,IL1RN,LBP,LEPR,PROM1,SERPINB1	47 (24)
IFNB1		cytokine	Activated	2.868	bias	1.58e-13	AXL,DLL1,GBP2,GBP4,GBP6,GBP7,Hamp/Hamp2,HLA-A,Ifi27l2a/Ifi27l2b,IFIT3,Igtp,IRGM,ITGB3,MCM6,Mx1,OAS2,Oasl2,RNASEL,STAT1,Tpm2,UBA7,ZBP1	72 (12)				NFKBIA		transcription regulator	Activated	2.255	bias	1.21e-06	CCND1,Cdkn1c,GBP2,HLA-A,IL1RN,LCN2,LY6E,NID1,RGS16,SLC1A2,VCAM1	45 (17)
Ifnar		group	Activated	3.687	bias	4.3e-13	AXL,GBP2,H2-Q8,HLA-A,IFIT3,IL15,IRF8,Mx1,OAS2,PSMB9,STAT1,TAP1,VCAM1,ZBP1	118 (17)				LGR5		transmembrane receptor	Activated	2	bias	1.25e-06	LHPP,OAT,RDH16,SLC1A2
Interferon alpha		group	Activated	4.422	bias	5.19e-13	AXL,CCND1,GBP2,GBP6,H2-L,HLA-A,IFIT3,IL15,IRF8,Mx1,NT5E,OAS2,Oasl2,PSMB9,RNASEL,RTP4,SAMD9L,SERPINB1,SIGLEC1,Slfn2,STAT1,TAP1,TRIB2,UBA7,VCAM1,ZBP1	72 (12)				PPARGC1A	1.413	transcription regulator	Activated	2.253		1.29e-06	APOA4,BMPER,CYP2B6,CYP3A5,HSD3B2,IL1RN,MCM6,PDK4,SULT2A1,UCP2	32 (11)
TRIM24		transcription regulator	Inhibited	-3.692	bias	3.95e-12	CA2,GBP2,GBP4,Ifi27l2a/Ifi27l2b,IFIT3,Igtp,IRGM,Ly6a (includes others),PSMB9,RTP4,SAMD9L,STAT1,TAP1,UBA7	62 (7)				LEP		growth factor	Activated	2.408	bias	1.7e-06	APOA4,CCND1,CYP17A1,Cyp2a12/Cyp2a22,CYP3A5,Cyp4a14,EGR1,IL1RN,LEPR,UCP2,VCAM1	43 (19)
STAT6		transcription regulator	Inhibited	-2.172		5.83e-12	CA2,CYP4A11,Cyp4a14,EGR1,FAM126A,FCGR3A/FCGR3B,GBP2,GBP6,GBP7,IFIT3,Igtp,IL15,Ly6a (includes others),LY75,MPEG1,Mx1,PLS1,PPARGC1A,PRKCA,RASSF4,SERPINB6,SYK,VCAM1,ZBP1	104 (16)				MED1		transcription regulator	Activated	2.592	bias	3.06e-06	CCND1,CYP17A1,CYP2B6,CYP3A5,Cyp4a14,PDK4,SULT2A1	30 (6)
IL6		cytokine	Activated	3.311	bias	1.77e-10	APCS,ATP2A1,CCND1,CFP,CTSC,CYP2B6,CYP3A5,EGR1,GBP2,H2-Q8,Hamp/Hamp2,HLA-A,IL15,IL2RG,ITGB3,LBP,LCN2,LY86,MKI67,Mt1,Mt2,Orm1 (includes others),PROM1,PSMB9,PTP4A3,PTPRC,STAT1,TAP1,TOP2A,VCAM1	116 (15)				CTNNB1		transcription regulator	Activated	2.405	bias	3.18e-06	CCND1,Cdkn1c,COL4A5,EGR1,FAM126A,ITGA6,LY6E,OAT,PROM1,QPCT,SLC1A2,SOX7,TEAD2,VCAM1	37 (11)
IFN alpha/beta		group	Activated	3.237	bias	4.12e-10	AXL,H2-Q8,HLA-A,Ifi27l2a/Ifi27l2b,IFIT3,IL15,IRF8,Ly6a (includes others),LY6E,Mx1,STAT1	104 (15)				PARP1		enzyme	Activated	2.389	bias	8.95e-06	CCND1,GBP2,GBP4,GBP6,GBP7,VCAM1	40 (9)
mir-21		microRNA	Inhibited	-2.833	bias	4.74e-10	CCND1,GBP2,GBP6,GBP7,INPP5D,IRGM,LEPR,MARCO,MKI67,OAS2,Orm1 (includes others),SIGLEC1,Slfn2,STAT1,TAP1,TOP2A,UBA7,VCAM1	108 (15)				IFN alpha/beta		group	Activated	2.176	bias	1.67e-05	H2-Q8,HLA-A,Ifi27l2a/Ifi27l2b,Ly6a (includes others),LY6E
IRF3		transcription regulator	Activated	3.796	bias	1.44e-09	Hamp/Hamp2,Ifi27l2a/Ifi27l2b,IFIT3,Igtp,IL15,IRGM,LCN2,Mx1,OAS2,Oasl2,PLCG2,SAMD9L,STAT1,TAP1,ZBP1	75 (13)				IKBKG		kinase	Activated	2.379	bias	1.73e-05	GBP2,HLA-A,IL1RN,LCN2,NID1,RGS16	41 (14)
ELAVL1		other	Activated	2.051	bias	1.76e-09	GBP6,H2-K2/H2-Q9,H2-L,H2-Q8,HLA-A,MPEG1,OAS2,PLCG2,PROM1,PTPRC,SLC39A5,Slfn2,STAT1,TOP2A,VCAM1	66 (7)				LGR4		transmembrane receptor	Activated	2	bias	1.99e-05	LHPP,OAT,RDH16,SLC1A2
TGFB1		growth factor	Activated	2.378	bias	2.46e-09	ACTA1,AXL,C1QA,CCND1,Cdkn1c,CDKN2C,COTL1,CTSC,CYBA,CYP17A1,EGR1,ELF4,FCGR3A/FCGR3B,FUT8,GBP2,Hamp/Hamp2,HES1,HSD3B2,IFIT3,IL15,INPP5D,ITGA6,ITGB2,ITGB3,LCN2,Ly6a (includes others),MAOA,MKI67,Mx1,NT5E,PBX1,PIK3CD,PLEK2,PPARGC1A,PRKCA,PROM1,PTGDS,PTP4A3,PTPRC,SELPLG,SERPINB1,ST3GAL6,STAT1,TOP2A,Tpm2,VCAM1	120 (24)				IFNG		cytokine	Activated	2.875	bias	3.71e-05	CCND1,EGR1,GBP2,GBP4,GBP6,GBP7,HLA-A,IL1RN,ITGA6,LCN2,Ly6a (includes others),LY6E,NTRK2,PRKCA,SLC1A2,VCAM1,ZBTB16	40 (11)
Ifn		group	Activated	2.084	bias	2.64e-09	CYP4A11,HLA-A,IL15,IRF8,LCN2,Mx1,NTRK2,OAS2,RNASEL,STAT1,TAP1,ZBP1	66 (11)				NFkB (complex)		complex	Activated	2.547	bias	4.13e-05	CCND1,CYP3A5,EGR1,GBP2,HLA-A,IL1RN,LCN2,RGS16,SLC1A2,STK10,VCAM1	32 (13)
IFNAR1		transmembrane receptor	Activated	2.931	bias	3.53e-09	AXL,DLL1,GBP4,HLA-A,IFIT3,IL15,Ly6a (includes others),Mx1,OAS2,Oasl2,RTP4,STAT1,VCAM1	90 (14)				PNPT1		enzyme	Inhibited	-2	bias	4.42e-05	GBP2,GBP4,GBP6,Oasl2
IL1B		cytokine	Activated	2.947	bias	4.02e-09	APCS,Cdkn1c,CYBA,CYP2B6,CYP3A5,EGR1,G0S2,GAS6,GBP2,GBP6,H2-L,Hamp/Hamp2,HES1,HLA-A,IFIT3,IL15,ITGB3,LBP,LCN2,Mt1,Mt2,NQO1,OAS2,PPARGC1A,PSMB9,PTGDS,RAC2,RGS16,Slfn2,STAT1,VCAM1	106 (14)				NR5A2		ligand-dependent nuclear receptor	Activated	2.17	bias	5.58e-05	CCND1,CYP17A1,HSD3B2,IL1RN,PTGDS	30 (10)
LLGL2		other	Activated	2.646	bias	1.32e-08	AXL,CDKN2C,EMP2,GAS6,ITGB2,SH2D4A,TOP2A					PIK3CG		kinase	Inhibited	-2.2		6.11e-05	GBP2,GBP4,GBP6,GBP7,HLA-A	35 (7)
CEBPA		transcription regulator	Activated	2.126	bias	2.2e-08	ABCB1,APOA4,CA2,CCND1,CYP2B6,CYP3A5,G0S2,Hamp/Hamp2,LCN2,LEPR,Ly6a (includes others),OAS2,Orm1 (includes others),PPARGC1A,PPL,PTPRC,RGS2,SERPINB1,SULT2A1,Sult2a2	94 (11)				TRIM24		transcription regulator	Inhibited	-2.236	bias	7.29e-05	CA2,GBP2,GBP4,Ifi27l2a/Ifi27l2b,Ly6a (includes others)
PNPT1		enzyme	Inhibited	-2.828	bias	2.81e-08	GBP2,GBP4,GBP6,IFIT3,Oasl2,RTP4,SAMD9L,STAT1	82 (7)				AGT		growth factor	Activated	2.606	bias	9.24e-05	CCND1,CYP17A1,Cyp4a14,EGR1,HSD3B2,LEPR,RGS2,UCP2,VCAM1	33 (16)
PARP1		enzyme	Activated	2.933	bias	3.66e-08	CCND1,GBP2,GBP4,GBP6,GBP7,HES1,Igtp,IRGM,STAT1,TMPRSS2,VCAM1	98 (15)				CXCL12		cytokine	Activated	2.391	bias	0.000137	CA2,CCND1,CYP3A5,EGR1,Ly6a (includes others),ZBTB16	22 (11)
NSUN6		enzyme	Activated	2.646	bias	9.27e-08	AXL,CDKN2C,COL4A3,EMP2,GAS6,ITGB2,TOP2A					IL27		cytokine	Activated	2.213	bias	0.000275	EGR1,GBP2,HLA-A,IL1RN,VCAM1	46 (15)
ABCB6		transporter	Activated	2.616		1.88e-07	Cyp2a12/Cyp2a22,CYP2B6,Cyp2c40 (includes others),Cyp2c54 (includes others),Cyp3a25 (includes others),CYP3A5,CYP4A11					OSM		cytokine	Activated	2.038	bias	0.000312	CCND1,CYP3A5,EGR1,GBP2,HLA-A,LBP,LCN2,SERPINB1,VCAM1	36 (15)
CHUK		kinase	Activated	3.497	bias	1.96e-07	CCND1,CYBA,GBP2,GBP4,HLA-A,ITGB3,LCN2,Mt1,Mt2,NID1,RGS16,Slfn2,VCAM1	115 (16)				Interferon alpha		group	Activated	2.01	bias	0.000415	CCND1,GBP2,GBP6,HLA-A,IL1RN,Oasl2,SERPINB1,VCAM1	49 (16)
TGM2		enzyme	Activated	3.053	bias	4.51e-07	ACTA1,CA2,CCND1,CFP,IFIT3,ITGA6,ITGB3,LY6E,OAS2,SAMD9L,STAT1,TAP1,UBA7	76 (13)				VCAN		other	Inhibited	-2.219		0.000456	IL1RN,LBP,LCN2,RGS2,VCAM1
ROR1		kinase	Activated	2.449	bias	6.05e-07	AXL,CDKN2C,EMP2,GAS6,ITGB2,TOP2A					IL17A		cytokine	Activated	2.378	bias	0.000524	CCND1,GBP2,IL1RN,LCN2,RGS16,VCAM1	38 (16)
miR-199a-5p (and other miRNAs w/seed CCAGUGU)		mature microRNA	Inhibited	-2.813	bias	6.46e-07	ACTA1,COL4A5,ITGB3,LCN2,SAMD9L,TMPRSS2,ZBP1,ZBTB16					IGF1		growth factor	Activated	2.078	bias	0.000632	CCND1,CYP17A1,EGR1,LCN2,LEPR,Ly6a (includes others),NTRK2,VCAM1	43 (20)
AR		ligand-dependent nuclear receptor	Activated	2.098	bias	6.9e-07	ACTA1,CCND1,Cdkn1c,CUX2,CYP17A1,EGR1,GAS6,HSD3B2,ITGA6,Ly6a (includes others),MAOA,PRKCA,PTGDS,SLC43A1,STAT1,SULT2A1,TMPRSS2,ZBP1,ZBTB16	95 (15)
IFNA2		cytokine	Activated	3.493	bias	8.42e-07	GBP2,GBP4,HLA-A,IFIT3,LY6E,NT5E,OAS2,STAT1,TAP1,THEMIS2,UBA7,VCAM1,ZBP1	110 (16)
MYC		transcription regulator	Activated	2.921	bias	8.87e-07	ACTA1,AXL,BMPER,CCND1,CYP26A1,EGR1,FUT8,GBP2,GBP4,HES1,HLA-A,IFIT3,ITGA6,Ly6a (includes others),MCM6,MKI67,Mt1,Mt2,NQO1,Oasl2,OAT,PPL,PRKCA,PROM1,PTPRC,SCPEP1,STAT1,TEAD1,TEAD2,VCAM1	108 (20)
IKBKB		kinase	Activated	3.249	bias	1.05e-06	CCND1,CYBA,EGR1,GBP2,HLA-A,ITGB3,LCN2,Mt1,Mt2,NID1,RGS16,Slfn2,Tpm2,VCAM1	112 (14)
SOX3		transcription regulator	Inhibited	-2.121	bias	1.18e-06	BMPER,CYP26A1,DLL1,GBP4,Oasl2,TEAD1,TEAD2,ZBTB16
CREB3L3		transcription regulator	Activated	2.197	bias	1.19e-06	APCS,APOA4,Cyp2b13/Cyp2b9,CYP2B6,Hamp/Hamp2
NR1I3		ligand-dependent nuclear receptor	Activated	2.898	bias	1.29e-06	ABCB1,APCS,Cyp2b13/Cyp2b9,CYP2B6,CYP3A5,Mt1,Sult1a1,SULT2A1,TMPRSS2	58 (5)
SOCS1		other	Inhibited	-2.557	bias	1.34e-06	CCND1,GBP6,IFIT3,IL15,IRGM,Mx1,OAS2,Oasl2,STAT1,VCAM1	72 (12)
NCOA2		transcription regulator	Activated	2.121	bias	1.5e-06	APOA4,CCND1,CYP17A1,CYP2B6,Cyp2c40 (includes others),EGR1,LECT2,Mx1,Sult2a2	78 (13)
CTNNB1		transcription regulator	Activated	3.005	bias	1.64e-06	ABCB1,CCND1,Cdkn1c,CENPM,COL4A5,CYP4F12,DCT,EGR1,FAM126A,HES1,IRF8,ITGA6,ITGB2,LECT2,LY6E,MPEG1,OAT,PROM1,QPCT,RASSF4,SOX7,SYK,TEAD2,VCAM1
POR		enzyme	Inhibited	-2.425	bias	1.81e-06	ACTA1,APOA4,CYP17A1,CYP26A1,CYP2B6,CYP4A11,GBP2,HLA-A,Mt1,RAD51B,STAT1
CG		complex	Activated	2.536	bias	3.45e-06	ABCB1,CYP17A1,CYP26A1,EGR1,FAM110C,G0S2,GBP6,HLA-A,HSD3B2,IFIT3,ITGB3,LEPR,Oasl2,RGS2,SULT2A1	96 (14)
TLR9		transmembrane receptor	Activated	2.336	bias	5.57e-06	CCND1,EGR1,Hamp/Hamp2,IFIT3,LAIR1,LCN2,Mx1,OAS2,Oasl2,STAT1,Wfdc17,ZAP70	78 (13)
RNY3		other	Activated	2.236	bias	5.84e-06	IFIT3,LY6E,OAS2,RTP4,SIGLEC1
HIF1A		transcription regulator	Activated	2.788	bias	6.1e-06	ABCB1,AXL,CCND1,Cdkn1c,CORO1A,ESRRG,Hamp/Hamp2,IL15,ITGB2,ITGB3,MB,NT5E,NTRK2,PRKCA,PROM1,VCAM1	105 (13)
IGF1		growth factor	Activated	2.13	bias	6.43e-06	ACTA1,ATP2A1,C1QA,CCND1,CYBA,CYP17A1,EGR1,IL2RG,LCN2,LEPR,Ly6a (includes others),MKI67,NTRK2,PSMB9,PTPRC,TAP1,VCAM1	103 (20)
TLR4		transmembrane receptor	Activated	3.382	bias	6.98e-06	ACTA1,CYP3A5,GBP2,IFIT3,Igtp,IL15,IRF8,IRGM,LCN2,MARCO,Mx1,RGS16,STAT1,VCAM1,Wfdc17	111 (16)
SOX1		transcription regulator	Inhibited	-2.449	bias	7.41e-06	BMPER,CYP26A1,GBP4,HES1,Oasl2,TEAD1,TEAD2
NFKBIA		transcription regulator	Activated	2.623	bias	7.89e-06	AXL,CCND1,Cdkn1c,CYBA,GBP2,HES1,HLA-A,IL15,LCN2,LY6E,Mt1,Mt2,NID1,RGS16,Slfn2,VCAM1	130 (18)
IKBKG		kinase	Activated	2.368	bias	9.06e-06	ACTA1,GBP2,HLA-A,LCN2,Mt1,Mt2,NID1,RGS16,Slfn2	115 (16)
OSM		cytokine	Activated	2.691	bias	9.18e-06	CCND1,CYP3A5,EGR1,GBP2,Hamp/Hamp2,HLA-A,IL15,LBP,LCN2,MAOA,Mt2,PSMB9,SERPINB1,SLC7A8,STAT1,TAP1,TOP2A,VCAM1	117 (17)
CD40LG		cytokine	Activated	2.549	bias	1e-05	AXL,CA2,CFP,CTSC,EGR1,G0S2,IFIT3,IL15,PSMB9,RGS2,SELPLG,STAT1,TAP1,VCAM1,ZAP70	116 (16)
CSF1		cytokine	Activated	2.721	bias	1.08e-05	CCND1,CYP17A1,EGR1,FCGR3A/FCGR3B,IRF8,ITGB3,MARCO,PTPRC,SIGLEC1,STAT1,VCAM1	129 (21)
Vegf		group	Activated	2.948	bias	1.15e-05	ABCB1,CA2,CDKN2C,COL4A3,CYP4A11,EGR1,EMP2,HES1,ITGA6,LCN2,LY75,MKI67,Mt2,RGS2,STK10,TRIB2,VCAM1	131 (23)
SRC (family)		group	Activated	2.183	bias	1.15e-05	EGR1,ITGB3,MAOA,PROM1,STAT1,VCAM1	118 (21)
MECOM		transcription regulator	Activated	2.191	bias	1.19e-05	Cdkn1c,ITGA6,ITGB3,Ly6a (includes others),PBX1
IFN Beta		group	Activated	2.446	bias	1.35e-05	HLA-A,IFIT3,IL15,Mt2,Mx1,OAS2,PRKCA,STAT1,ZBP1	99 (15)
KLF4		transcription regulator	Activated	2.206	bias	1.49e-05	BMPER,CCND1,CYP26A1,DLL1,GBP4,HES1,Oasl2,PPL,PROM1,TEAD1,TEAD2,VCAM1	45 (5)
NRG1		growth factor	Activated	3.273	bias	1.54e-05	AXL,CCND1,CDKN2C,COL4A3,EGR1,EMP2,GAS6,HES1,ITGB2,ITGB3,SH2D4A,TOP2A	113 (20)
SMARCA4		transcription regulator	Activated	2.523	bias	1.54e-05	ABCB1,ABHD2,ACTA1,ATP2A1,CCND1,CFP,COTL1,CYP26A1,DCT,DLL1,EGR1,Mt1,PLS1,PSMB9,RAC2,RGS2,STAMBPL1,SYK,TAP1	83 (12)
IRF1		transcription regulator	Activated	2.513	bias	1.58e-05	CCND1,GBP2,H2-L,IFIT3,IL15,OAS2,PSMB9,STAT1,TAP1,VCAM1	121 (18)
AGT		growth factor	Activated	3.18	bias	1.69e-05	ACTA1,CCND1,CYBA,CYP17A1,CYP4A11,Cyp4a14,EGR1,HES1,HSD3B2,IL15,ITGB3,LEPR,PPARGC1A,RGS2,UCP2,VCAM1	112 (22)
JAK2		kinase	Activated	2.415	bias	1.77e-05	CCND1,EGR1,GBP2,LCN2,LY6E,PSMB9,STAT1,TAP1,TRIB2	120 (18)
JUN		transcription regulator	Activated	2.419	bias	2.02e-05	ABCB1,AXL,BCL9,CCND1,CFP,CYP17A1,GAS6,HES1,LBP,NQO1,PTGDS,STAT1,SULF2,SULT2A1,SYK,VCAM1	112 (24)
CEBPB		transcription regulator	Activated	2.045	bias	2.16e-05	ABCB1,APCS,CCND1,CTSC,CYP17A1,Hamp/Hamp2,HLA-A,HSD3B2,LBP,LCN2,LEPR,Orm1 (includes others),PPARGC1A,RAC2,SULT2A1	128 (23)
MED1		transcription regulator	Activated	2.377	bias	2.81e-05	CCND1,CYP17A1,CYP2B6,CYP3A5,CYP4A11,Cyp4a14,IRF8,MB,SULT2A1	65 (7)
TMEM173		other	Activated	2.219	bias	2.93e-05	Ifi27l2a/Ifi27l2b,IFIT3,LCN2,Mx1,PTPRC,RGS16	34 (4)
CXCL12		cytokine	Activated	3.088	bias	2.95e-05	AXL,CA2,CCND1,CYP3A5,DMPK,EGR1,ITGB3,Ly6a (includes others),SELPLG,ZBTB16	112 (20)
HGF		growth factor	Activated	2.149	bias	3.66e-05	CCND1,CDKN2C,CYP17A1,CYP2B6,EGR1,EMP2,HES1,IRF8,ITGA6,LCN2,LY75,MKI67,RGS2,STK10,TRIB2,VCAM1	115 (20)
NR4A3		ligand-dependent nuclear receptor	Activated	2.352	bias	3.85e-05	CCND1,HSD3B2,MB,NQO1,PPARGC1A,UCP2	65 (10)
LEP		growth factor	Activated	3.121	bias	4.84e-05	APOA4,CCND1,CYBA,CYP17A1,Cyp2a12/Cyp2a22,Cyp2c54 (includes others),CYP3A5,CYP4A11,Cyp4a14,EGR1,HES1,LEPR,PPARGC1A,UCP2,VCAM1	100 (20)
miR-34a-5p (and other miRNAs w/seed GGCAGUG)		mature microRNA	Inhibited	-2.77	bias	5.12e-05	AXL,CCND1,DENND1C,DLL1,FAM110C,ITGB3,SAMD9L,SELPLG
SP1		transcription regulator	Activated	2.608	bias	5.14e-05	ABCB1,ABHD2,CCND1,CDKN2C,CYP17A1,CYP26A1,CYP2B6,EGR1,IL15,ITGB3,MAOA,Mt1,PRKCA,PROM1,RASGRP2,STAT1,TEAD1	83 (12)
JAK1		kinase	Activated	2.213	bias	5.92e-05	HLA-A,Oasl2,Orm1 (includes others),PSMB9,STAT1,TAP1	100 (18)
ACKR2		G-protein coupled receptor	Inhibited	-2.236	bias	6.13e-05	Ifi27l2a/Ifi27l2b,IFIT3,OAS2,Oasl2,STAT1
ETS1		transcription regulator	Activated	2.16	bias	6.35e-05	ABCB1,CCND1,EGR1,ITGB2,ITGB3,LAIR1,NQO1,SERPINB6,WAS,ZAP70	80 (15)
IL21		cytokine	Activated	3	bias	6.5e-05	EGR1,GBP6,IFIT3,Igtp,MKI67,OAS2,PSMB9,PTPRC,TAP1	107 (16)
Hbb-b2		other	Activated	2	bias	8.52e-05	C1QA,CYBA,Hamp/Hamp2,IL2RG,LY86
TICAM1		other	Activated	2.813	bias	8.98e-05	EGR1,IFIT3,Igtp,IL15,IRGM,MKI67,Mx1,VCAM1	47 (9)
CSF2		cytokine	Activated	2.221	bias	0.000103	CCND1,CDKN2C,CTSC,EGR1,IL15,INPP5D,ITGB3,LY75,MARCO,MCM6,MFSD2A,MKI67,Slfn2,TOP2A,TRIB2	113 (20)
PDGF BB		complex	Activated	2.8	bias	0.000108	CCND1,EGR1,GBP2,HES1,LBP,MCM6,Mt1,Mt2,PLCG2,RGS2,SYK,VCAM1	109 (19)
Immunoglobulin		complex	Inhibited	-2.061		0.00011	CFP,EGR1,FCGR3A/FCGR3B,IFIT3,IL2RG,LCN2,Ly6a (includes others),MKI67,Mx1,NT5E,OAS2,PPARGC1A,RGS16,RGS2,VCAM1,ZBTB16	128 (22)
PRKCE		kinase	Activated	2.412	bias	0.000118	ABCB1,CCND1,EGR1,IL2RG,RGS2,VCAM1	115 (19)
GMNN		transcription regulator	Inhibited	-2.449	bias	0.000166	BMPER,CYP26A1,GBP4,Oasl2,TEAD1,TEAD2
PTCH1		transmembrane receptor	Inhibited	-2	bias	0.000176	ACTA1,CCND1,DLL1,Tpm2
IKZF1		transcription regulator	Inhibited	-3.073	bias	0.000201	AXL,GAS6,HES1,IFIT3,RASSF4,RTP4,ST3GAL6,SULF2,Sult1a1,TENM3
NFkB (complex)		complex	Activated	3.476	bias	0.00021	ABCB1,CCND1,CYP3A5,EGR1,G0S2,GAS6,GBP2,HLA-A,IL15,LCN2,PSMB9,RGS16,SELPLG,STK10,TAP1,VCAM1,Wfdc17	122 (19)
PPARGC1A	1.53	transcription regulator	Activated	2.221	bias	0.000212	APOA4,BMPER,CTSC,CYP2B6,CYP3A5,GAS6,HSD3B2,MB,MCM6,PPARGC1A,SULT2A1,UCP2	96 (16)
IFNA1/IFNA13		cytokine	Activated	2.183	bias	0.000219	Mx1,OAS2,SIGLEC1,STAT1,ZBP1	65 (10)
SMAD3		transcription regulator	Activated	2.18	bias	0.000228	APOA4,CCND1,EGR1,Hamp/Hamp2,IL15,INPP5D,Ly6a (includes others),Orm1 (includes others),PPARGC1A,PTP4A3	122 (20)
TLR3		transmembrane receptor	Activated	2.804	bias	0.000292	GBP2,GBP4,Hamp/Hamp2,IFIT3,IL15,LCN2,Mx1,Oasl2,PIK3CD,STAT1	70 (11)
HES1	1.738	transcription regulator	Inhibited	-2.144	bias	0.000304	Cdkn1c,DLL1,HES1,OAT,PTGDS
MYD88		other	Activated	2.777	bias	0.000339	APCS,EGR1,HLA-A,IL15,INPP5D,IRF8,MARCO,MKI67,VCAM1,ZAP70	108 (18)
PPARG		ligand-dependent nuclear receptor	Activated	2.315	bias	0.000383	CA2,CCND1,Cdkn1c,CDKN2C,CYBA,CYP26A1,CYP4A11,Cyp4a14,HES1,MKI67,PPARGC1A,Tpm2,UCP2,VCAM1	114 (21)
DDX58		enzyme	Activated	2.183	bias	0.000664	DLL1,IFIT3,IRF8,Mx1,STAT1	96 (15)
SASH1		other	Activated	2.236	bias	0.000664	IFIT3,IL15,IRGM,MARCO,STAT1
IL33		cytokine	Activated	2.433	bias	0.000727	AXL,CCND1,G0S2,IL15,IL2RG,LEPR,NT5E,PIK3CD,RASSF4
MTOR		kinase	Activated	2.36	bias	0.000761	CCND1,CYP17A1,Hamp/Hamp2,IRF8,MB,PPARGC1A,SERPINB1,STAT1,TMPRSS2,VCAM1,ZAP70	132 (22)
EDN1		cytokine	Activated	2.782	bias	0.000825	ACTA1,CCND1,DCT,EGR1,ITGB3,LEPR,PRKCA,VCAM1	103 (21)
VEGFA		growth factor	Activated	3.044	bias	0.000852	CCND1,DLL1,EGR1,HES1,INPP5D,ITGB3,MKI67,PPARGC1A,PRKCA,VCAM1	101 (19)
Irgm1		other	Inhibited	-2	bias	0.000975	Ifi27l2a/Ifi27l2b,IFIT3,MKI67,OAS2

## Sheet: S4B Table_Male-biased_down
S4B Table_Male-biased_down
Male-biased genes down-regulated in MDKO												Male-biased genes down-regulated in FDKO
Upstream Regulator	Expr Fold Change	Molecule Type	Predicted Activation State	Activation z-score	Flags	p-value of overlap	Target Molecules in Dataset	Mechanistic Network				Upstream Regulator	Expr Fold Change	Molecule Type	Predicted Activation State	Activation z-score	Flags	p-value of overlap	Target Molecules in Dataset	Mechanistic Network
STAT5B		transcription regulator	Inhibited	-3.961		9.76e-16	Adh6-ps1,ALAS2,CCNE1,Cyp2d9 (includes others),CYP4A22,EGFR,ELOVL3,GSTP1,Hsd3b4 (includes others),Keg1,LAMA3,Mup1 (includes others),NAT8,SLC15A5,Slco1a1,UGT2B28					ACOX1		enzyme	Inhibited	-2.157		7.75e-11	CES3,Cyp2d9 (includes others),ELOVL3,GSTP1,HSD3B1,Mup1 (includes others),SERPINA1,SLC22A25
GPD1		enzyme				1.19e-14	C6,CYP4A22,CYP7B1,EGFR,ELOVL3,Hsd3b4 (includes others),Mup1 (includes others),PFKFB3,RARRES1,TTC39C,UGT2B17					STAT5B		transcription regulator	Inhibited	-2.339		6.63e-10	ALAS2,Cyp2d9 (includes others),ELOVL3,GSTP1,Hsd3b4 (includes others),Keg1,Mup1 (includes others),NUDT7,Slco1a1
SLC25A13		transporter				1.51e-14	C6,CYP4A22,CYP7B1,EGFR,ELOVL3,Hsd3b4 (includes others),Mup1 (includes others),PFKFB3,RARRES1,TTC39C,UGT2B17
ACOX1		enzyme	Inhibited	-2.728		1.53e-12	ACSL1,Cyp2d9 (includes others),CYP7B1,EGFR,ELOVL3,GSTP1,HSD3B1,Mup1 (includes others),SELENBP1,SERPINA1,SLC22A25	17 (2)
RORC		ligand-dependent nuclear receptor				4.22e-12	CYP2F1,CYP7B1,ELOVL3,GSTP1,HSD3B1,Hsd3b4 (includes others),Keg1,Mup1 (includes others),NAT8,SELENBP1,Slco1a1
RORA		ligand-dependent nuclear receptor				3.67e-11	CYP2F1,CYP7B1,ELOVL3,GSTP1,HSD3B1,Hsd3b4 (includes others),Keg1,Mup1 (includes others),NAT8,SELENBP1,Slco1a1
PPARA		ligand-dependent nuclear receptor		0.076	bias	3.1e-09	ACSL1,ADRB3,C6,CCNE1,Cyp2c40 (includes others),CYP7B1,ELOVL3,FITM1,GSTP1,HSD3B1,Mup1 (includes others),SCP2,SELENBP1	19 (3)
NFE2L2		transcription regulator		-0.812	bias	1.55e-06	ABCG2,ADH7,ALAS2,AOX1,CA3,CYP4A22,GSTP1,HSD3B1,SLC6A9,UGT2B28
NR1I3		ligand-dependent nuclear receptor	Inhibited	-2.423	bias	1.57e-06	CYP2F1,CYP7B1,GSTP1,RARRES1,UGT2B17,UGT2B28
FST		other	Inhibited	-2.2		2.93e-06	ACSL1,CTRB2,ELOVL3,Mup1 (includes others),SERPINA1
FECH		enzyme				3.14e-06	Cyp2d9 (includes others),CYP2F1,CYP7B1,Slco1a1
FGF19		growth factor				8.84e-06	ACSL1,Cyp2d9 (includes others),CYP7B1,ELOVL3,SERPINA1
CTNNB1		transcription regulator	Inhibited	-3.278	bias	1.24e-05	C6,CA3,CCNE1,Cyp2d9 (includes others),CYP7B1,EGFR,ELOVL3,Hsd3b4 (includes others),Mup1 (includes others),NAT8,SERPINA1,Slco1a1
SMARCB1		transcription regulator		-1.387	bias	2.17e-05	ACSL1,C4A/C4B,CCNE1,Cyp2d9 (includes others),MCM10,Mup1 (includes others)
POR		enzyme				2.89e-05	ACSL1,CYP7B1,ELOVL3,HSD3B1,Hsd3b4 (includes others),PFKFB3
AR		ligand-dependent nuclear receptor		-1.96	bias	4.15e-05	C4A/C4B,Ces1e,EGFR,GSTP1,HSD3B1,RARRES1,SERPINA12,UGT2B17,UGT2B28
ST8SIA1		enzyme				4.32e-05	C4A/C4B,CCNE1,EGFR
Insulin		group		-1.366	bias	0.000159	ACSL1,ADRB3,CA3,CCNE1,EGFR,ELOVL3,GSTP1,PFKFB3	27 (7)
NR1I2		ligand-dependent nuclear receptor		1.432		0.000199	Cyp2d9 (includes others),GSTP1,Hsd3b4 (includes others),Mup1 (includes others),NAT8
PPARG		ligand-dependent nuclear receptor		-1.961	bias	0.000208	ABCG2,ACSL1,ADRB3,EGFR,ELOVL3,PFKFB3,SCP2,SERPINA1	21 (6)
HDAC1		transcription regulator		-0.447		0.000245	CCNE1,EGFR,GSTP1,MCM10,PFKFB3,SLC35D1	20 (4)
CYTOR		other				0.000294	CCNE1,EGFR
PSEN1		peptidase				0.000304	ABCG2,ACSL1,DPY19L3,EGFR,GSTP1,MCM10,NME1	11 (3)
ABCB6		transporter				0.000381	ALAS2,Cyp2c40 (includes others),Cyp2d9 (includes others)
SLC5A5		transporter				0.00047	ELOVL3,Mup1 (includes others)
HNF1B		transcription regulator				0.000617	FOXA3,SERPINA1,Slco1a1,UGT2B17	6 (2)
FZR1		kinase				0.000809	CCNE1,PFKFB3
Growth hormone		group				0.000996	ACSL1,CA3,EGFR,GSTP1,PFKFB3	20 (5)

## Sheet: S4C Table_All_up
S4C Table_All_up
All genes up-regulated in MDKO												All genes up-regulated in FDKO
Upstream Regulator	Expr Fold Change	Molecule Type	Predicted Activation State	Activation z-score	Flags	p-value of overlap	Target Molecules in Dataset	Mechanistic Network				Upstream Regulator	Expr Fold Change	Molecule Type	Predicted Activation State	Activation z-score	Flags	p-value of overlap	Target Molecules in Dataset	Mechanistic Network
IFNG		cytokine	Activated	6.17	bias	1.36e-22	ABCB1,ADCY7,AIF1,ALPL,ATF3,BMF,C1QA,CCND1,CCRL2,CD163,CD276,CD5L,CD63,CD83,CDH13,CDKN2A,CDKN2B,CENPM,CFP,CHAC1,CLIC5,CMPK2,CORO1A,CSF2RB,CTSC,CYBA,DCT,DDX60,Defb1,DLL1,DOK1,EGR1,ELN,ENTPD2,FBLN1,FCGR3A/FCGR3B,FGL2,GAL3ST1,GAS6,GBP2,GBP4,GBP5,GBP6,GBP7,GDF15,GLS,GNA14,HCK,HLA-A,HLA-DMB,HSPB1,HTRA1,ICAM1,Ifi202b,IFI44,IFIH1,IFIT1B,IFIT2,IFIT3,Igtp,IL15,IRF7,IRF8,IRGM,IRS2,ISG15,ISG20,ITGA6,ITGB2,IT…	307 (21)				STAT3		transcription regulator	Activated	2.381	bias	1.57e-13	APOA4,BMF,CCND1,CCND2,CCRL2,CD83,CD9,CDKN2A,CDKN2B,CLIC5,CLN6,CYP26A1,DTX3,EGR1,GBP2,GBP6,H2-Q8,HLA-A,HOXA10,Ifi202b,IFI44,IFIT1B,IGFBP1,IHH,IL1RN,IL2RB,IRF7,ISG15,ISG20,JUNB,LBP,LDHB,LEPR,NDRG1,NR4A2,OAS1,PIM1,PLAU,PROM1,RAB27A,S100A9,SAA1,SERPINB1,SERPINE2,SMAD9,SYNPO,TFF3,USP18,XAF1	180 (17)
STAT1	1.673	transcription regulator	Activated	5.957	bias	2.48e-22	ABCB9,ALPK1,APOBEC3B,APOC2,AXL,CCND1,CCRL2,CLIC5,CMPK2,CSF3R,Cyp2d9 (includes others),CYP3A5,CYP4A11,DDX60,EGR1,FGL2,GBP2,GBP4,GBP5,GBP6,GLS,HES1,HTRA1,ICAM1,IFI44,IFIH1,IFIT1B,IFIT2,IFIT3,Igtp,IL15,IRF7,IRF8,ISG15,LCN2,Ly6a (includes others),LY6E,Mx1,NLRC5,OAS1,OAS2,Oasl2,PDGFC,PIM1,PSMB9,RTP4,SAMD9L,SLC51B,Slfn2,SP110,STAT1,TAP1,Tgtp1/Tgtp2,TYMP,USP18,Wfdc17,XAF1,ZBP1	308 (19)				ACOX1		enzyme	Inhibited	-2.898		8.39e-12	CD63,COL4A2,CYP26A1,Cyp4a14,ELOVL3,IGFBP1,KRT23,LCN2,LHPP,LPL,LY6D,MFGE8,NUPR1,OAT,Orm1 (includes others),PDK4,PIGP,PLIN2,QPCT,RGS2,TRIB3,UCP2	145 (9)
TRIM24		transcription regulator	Inhibited	-5.422	bias	5.95e-20	Apol9a/Apol9b,CA2,CMPK2,DDX60,DHX58,GBP2,GBP4,Ifi27l2a/Ifi27l2b,IFI44,IFIH1,IFIT1B,IFIT2,IFIT3,Igtp,IRF7,IRGM,ISG15,Ly6a (includes others),OAS1,PARP12,PSMB9,RTP4,SAMD9L,SPP1,STAT1,TAP1,Tgtp1/Tgtp2,TLR2,TRIM6-TRIM34,UBA7,USP18	115 (7)				PNPT1		enzyme	Inhibited	-3.742	bias	9.78e-12	Apol9a/Apol9b,DTX3,GBP2,GBP4,GBP6,IFI44,IFIT1B,IRF7,ISG15,OAS1,Oasl2,Trim30a/Trim30d,USP18,XAF1	183 (11)
PNPT1		enzyme	Inhibited	-4.69	bias	2.32e-19	Apol9a/Apol9b,CMPK2,DTX3,GBP2,GBP4,GBP6,IFI44,IFIH1,IFIT1B,IFIT3,IRF7,ISG15,OAS1,Oasl2,PARP12,RTP4,SAMD9L,STAT1,Tgtp1/Tgtp2,Trim30a/Trim30d,USP18,XAF1	239 (11)				CTNNB1		transcription regulator	Activated	4.972	bias	3.32e-11	ALDH1A2,AQP4,AR,BMF,CASC4,CCND1,CCND2,Cdkn1c,CDKN2A,CDKN2B,COL4A1,COL4A2,COL4A5,COMMD3-BMI1,EGR1,ELOVL3,FAM126A,GADD45B,HTRA1,IGF2,IHH,ITGA6,LHX2,LHX6,LMO2,LPL,LY6E,MFGE8,NGFR,NR4A1,OAT,OLIG1,PEG3,PLAU,PROM1,QPCT,S100A8,SAA1,SERPINE2,SIM2,SLC16A6,SLC1A2,SLC1A5,SORBS3,SOX4,SOX7,SOX9,SPP1,TEAD2,TNIK,VCAM1,WNT2,XAF1,ZIC1	203 (17)
SIRT1		transcription regulator	Inhibited	-5.429	bias	3.22e-19	ABCB1,AFP,ANO1,CCND1,CD83,CDKN2A,CDKN2B,CDKN2C,CMPK2,CORO1A,CYP2B6,DDX60,DHX58,EPDR1,FGFR1,GBP6,H2-Q8,HCK,HLA-A,ICAM1,IFI44,IFIT1B,IFIT3,Igtp,IL2RG,IRF7,IRGM,LAPTM5,LY6E,MAOA,MLH1,NLGN2,NLRC5,NR1D1,NTRK2,OAS1,OAS2,Oasl2,PARP12,PDGFRA,PPARGC1A,PSMB9,RGS16,RTP4,Scd2,SCNN1A,Slfn2,SP110,STAT1,SYNPO,TAP1,Tgtp1/Tgtp2,Trim30a/Trim30d,UBA7,UCP2,USP18,ZNF618	350 (20)				IFNG		cytokine	Activated	4.825	bias	7.15e-11	ADORA1,ALPL,ASNS,ATF3,BMF,CASP6,CCND1,CCND2,CCRL2,CD276,CD63,CD72,CD83,CDH13,CDKN2A,CDKN2B,CHAC1,CLIC5,CYB561,DDX60,EGR1,ELN,GAL3ST1,GBP2,GBP4,GBP6,GBP7,GDF15,GLS,GNA14,HLA-A,HSPB1,HTRA1,Ifi202b,IFI44,IFIT1B,IL1RN,IL22RA1,IRF7,IRS2,ISG15,ISG20,ITGA6,JUNB,LCN2,LCP2,LPL,Ly6a (includes others),LY6E,NR1D1,NTRK1,NTRK2,NUPR1,OAS1,P2RY14,PF4,PIM1,PLAU,PLD1,PRKCA,RAB27A,RRAGD,S100A8,S100A9,SLC1A2,SORT1,S…	214 (17)
STAT5B		transcription regulator	Inhibited	-2.839		6.45e-19	A1BG,ABCB1,ACOT11,AR,BMF,CA2,CCND1,CD276,Cdkn1c,CORIN,CUX2,CYP17A1,Cyp2a12/Cyp2a22,Cyp2b13/Cyp2b9,CYP2B6,Cyp2d9 (includes others),CYP3A5,CYP4A11,CYP4A22,ELOVL3,FAM126A,FBLN1,G0S2,Hamp/Hamp2,HAO2,HSD3B2,IL2RB,MB,MTMR11,NIPAL1,NQO1,NR4A2,NT5E,PDZRN3,PIM1,PPP1R3C,PROM1,RAD51B,SLC16A5,Slc22a26,SLC51B,STAMBPL1,SULT2A1,Sult2a2,TLR2,TMEM98,TOX	292 (14)				PPARA		ligand-dependent nuclear receptor	Activated	2.484	bias	8.02e-11	Acot6,AGXT,APOA4,APOC2,ASNS,CCND1,CD63,CDKN2A,CSAD,CYP2B6,Cyp4a14,ELOVL3,ETHE1,FBXO21,FGF21,GLS,H2-T10,IGFBP1,IL1RN,KRT23,LPL,LY6D,ME2,NR1D1,Orm1 (includes others),PDK4,PLIN2,PTGR1,QPCT,RFX4,S100A8,S100A9,SAA1,SERINC2,SULT2A1,TMEM98,UCP2,VCAM1	181 (19)
Ifnar		group	Activated	4.769	bias	8.74e-18	APOBEC3B,AXL,GBP2,H2-Q8,HLA-A,IFIH1,IFIT1B,IFIT2,IFIT3,IL15,IRF7,IRF8,ISG15,ISG20,Mx1,NLRC5,OAS1,OAS2,PSMB9,SPP1,STAT1,TAP1,TLR2,USP18,VCAM1,XAF1,ZBP1	247 (18)				SIRT1		transcription regulator	Inhibited	-4.464	bias	1.47e-10	ANO1,CCND1,CCND2,CD72,CD83,CDKN2A,CDKN2B,CYP2B6,DDX60,EPDR1,FGF21,FGFR1,GBP6,H2-Q8,HLA-A,IFI44,IFIT1B,IRF7,LY6E,Ms4a6b,NLGN2,NR1D1,NTRK2,OAS1,Oasl2,PDGFRA,PDK4,RGS16,Scd2,SYNPO,Trim30a/Trim30d,UCP2,USP18,WNT2,ZNF618	234 (19)
IRF7	1.537	transcription regulator	Activated	5.795	bias	1.74e-17	CCRL2,CMPK2,DHX58,GBP4,GBP5,Hamp/Hamp2,IFI44,IFIH1,IFIT1B,IFIT2,IFIT3,Igtp,IL15,IRF7,IRF8,IRGM,ISG15,ISG20,Ly6a (includes others),Mx1,OAS1,OAS2,Oasl2,PARP12,PSMB9,RTP4,SAMD9L,STAT1,TAP1,TNFAIP8,Trim30a/Trim30d,UBA7,USP18,XAF1,ZBP1	152 (14)				IL1B		cytokine	Activated	4.09	bias	1.14e-09	ACPP,ALPL,APOC2,AQP4,ATF3,BMF,CCRL2,CD83,Cdkn1c,CYP2B6,CYP3A5,EFNA1,EGR1,ELN,GADD45B,GBP2,GBP6,GDF15,H19,HLA-A,HSPB1,IFIT1B,IGFBP1,IL1RN,IRF7,IRS2,ISG15,ISG20,JUNB,LBP,LCN2,NIBAN1,NR1D1,NR4A1,NR4A2,NTRK1,PDGFRA,PIM1,PLAU,PLD1,PTGDS,PTGIS,RGS16,S100A8,S100A9,SAA1,SLC1A2,SLC25A4,SOX9,SPP1,TLR7,TLR8,TXNIP,TYMP,USP18,VCAM1	220 (18)
IFNB1		cytokine	Activated	4.44	bias	5.32e-17	AXL,CD83,CLSTN1,CMPK2,Ctla2a/Ctla2b,DHX58,DLL1,GBP2,GBP4,GBP5,GBP6,GBP7,GLIS2,Hamp/Hamp2,HLA-A,Ifi27l2a/Ifi27l2b,IFIH1,IFIT1B,IFIT2,IFIT3,Igtp,IP6K2,IRF7,IRGM,ISG15,ISG20,ITGB3,MCM6,MGST2,Mx1,OAS1,OAS2,Oasl2,PARP12,RNASEL,SPP1,STAT1,Tgtp1/Tgtp2,Tpm2,Trim30a/Trim30d,TRIM6-TRIM34,UBA7,USP18,XAF1,ZBP1	163 (14)				STAT1	1.182	transcription regulator	Activated	4.008	bias	2.14e-09	ABCB9,APOC2,CASP6,CCND1,CCND2,CCRL2,CLIC5,CYP3A5,DDX60,EGR1,GBP2,GBP4,GBP6,GLS,HTRA1,IFI44,IFIT1B,IRF7,ISG15,LCN2,Ly6a (includes others),LY6E,OAS1,Oasl2,PF4,PIM1,SORT1,TLR8,TYMP,USP18,XAF1	210 (16)
PIK3CG		kinase	Inhibited	-3.319		2.53e-16	ABCB1,AIF1,APOBEC3B,ATP6V0D2,FCGR3A/FCGR3B,GBP2,GBP4,GBP5,GBP6,GBP7,H2-L,HLA-A,ICAM1,Igtp,IL2RB,IRGM,ITGB3,NLRC5,OAS2,PIK3CD,SOX9,STAT1,TAP1,Tgtp1/Tgtp2,TLR2,Trim30a/Trim30d,ZBP1	318 (19)				FZD9		G-protein coupled receptor	Activated	2.8	bias	2.45e-09	CXCL14,Ifi202b,Ifi27l2a/Ifi27l2b,IFI44,IFIT1B,IRF7,ISG15,Oasl2
Interferon alpha		group	Activated	6.214	bias	9.32e-16	AFP,APOBEC3B,ATF3,AXL,CCND1,CD83,CSF2RB,DHX58,DYNLT1,GBP2,GBP5,GBP6,GLS,H2-L,HLA-A,ICAM1,Ifi27,IFI44,IFIH1,IFIT1B,IFIT2,IFIT3,IL15,IRF7,IRF8,ISG15,ISG20,Mx1,NT5E,OAS1,OAS2,Oasl2,PARP12,PIM1,PSMB9,RNASEL,RTP4,SAMD9L,SERPINB1,SIGLEC1,SLC1A5,Slfn2,SP110,SPRY4,STAT1,TAP1,Tgtp1/Tgtp2,TLR2,TRIB2,TYMP,UBA7,USP18,VCAM1,WDFY1,ZBP1	139 (13)				SP1		transcription regulator	Activated	4.052	bias	2.9e-09	ABHD2,ALPL,AR,ASNS,ATF3,CCND1,CCND2,CDKN2A,CDKN2B,CRYBB3,CYP17A1,CYP21A2,CYP26A1,CYP2B6,EGR1,EZR,FGFR1,GDF15,IGF2,IGFBP1,IL2RB,KRT4,LPL,LTBP3,NDRG1,NGFR,NTRK1,PDGFRA,PIM1,PLAU,PREX1,PRKCA,PROM1,SERPINE2,SLC19A1,SLC25A4,SOX9,SPP1,SRC,TEAD1	248 (22)
IRF3		transcription regulator	Activated	5.429	bias	2.02e-14	APOBEC3B,CCRL2,CMPK2,DDX60,DHX58,GBP5,Hamp/Hamp2,Ifi27l2a/Ifi27l2b,IFI44,IFIH1,IFIT1B,IFIT2,IFIT3,Igtp,IL15,IRF7,IRGM,ISG15,ISG20,JUNB,LCN2,Mx1,NLRC5,OAS1,OAS2,Oasl2,PARP12,PLCG2,SAMD9L,STAT1,TAP1,Trim30a/Trim30d,USP18,ZBP1	148 (14)				PPARD		ligand-dependent nuclear receptor	Activated	2.925	bias	3.44e-09	ADORA1,APOA4,C11orf86,CCND1,CCND2,Cdkn1c,CSAD,CYP2B6,GSTA5,IGFBP1,LDHB,LPL,MFGE8,MMD2,MYCL,OXCT1,Pcp4l1,PDK4,PLIN2,SERINC2,SLC22A3,Tlr12,UCP2,ZBED5	236 (19)
IFNAR1		transmembrane receptor	Activated	3.777	bias	6.95e-14	Apol9a/Apol9b,ATF3,AXL,CLIC5,CMPK2,DLL1,GBP4,HLA-A,IFI44,IFIH1,IFIT1B,IFIT2,IFIT3,IL15,IRF7,ISG15,Ly6a (includes others),Mx1,OAS1,OAS2,Oasl2,PARP12,RTP4,STAT1,TLR2,TNFAIP2,USP18,VCAM1,XAF1	229 (17)				IFNB1		cytokine	Activated	3.759	bias	4.17e-09	CD83,CLSTN1,GBP2,GBP4,GBP6,GBP7,GLIS2,HLA-A,Ifi27l2a/Ifi27l2b,IFIT1B,IP6K2,IRF7,ISG15,ISG20,MCM6,MGST2,OAS1,Oasl2,PDK4,SPP1,TLR7,TLR8,Tpm2,Trim30a/Trim30d,TRIM6-TRIM34,USP18,XAF1	133 (12)
IFNL1		cytokine	Activated	4.411	bias	1.35e-13	ATF3,CD83,CHAC1,CMPK2,DDX60,GBP5,IFI44,IFIH1,IFIT2,IFIT3,ISG15,ISG20,MLKL,OAS1,OAS2,PSMB9,RTP4,SP110,STAT1,TLR2,USP18,XAF1	256 (15)				NFKBIA		transcription regulator	Activated	2.185	bias	1.51e-08	ATP11A,CCND1,CCND2,CDH13,Cdkn1c,GADD45B,GBP2,GPX3,GRK5,HLA-A,HOXA10,IFIT1B,IGF2,IL1RN,IRX3,ISG15,JUNB,LCN2,LY6E,MFGE8,NID1,NR4A1,PIM1,PLAU,RASA3,RGS16,S100A8,S100A9,SERPINE2,SLC1A2,SOX9,TNFAIP8,VCAM1	196 (17)
TNF		cytokine	Activated	5.552	bias	1.48e-13	ABR,ACKR3,ACTA1,APCS,APOBEC3B,APOC2,AR,ARRDC3,ATF3,BMPER,CA2,CCND1,CD163,CD83,CDC42EP5,CDH13,CDKN2A,CDKN2C,CIB2,CKM,CLCF1,CLDN7,COL4A3,COTL1,CSF2RB,CTDSPL,CTSC,CYBA,CYP17A1,EFNA1,EGR1,EMP2,FGFR1,FOXF1,G0S2,GBP2,GBP4,GBP6,GDF15,GLS,GSTM2,H19,Hamp/Hamp2,HES1,HLA-A,HSD3B2,ICAM1,IFIH1,IFIT1B,IFIT3,IGF2,IL15,INPP5D,IRF7,IRF8,IRS2,ISG15,ITGA6,ITGB2,ITGB3,JUNB,KRT23,LBP,LCN2,LPL,MAP4K4,MFSD2A,MGST2,Mt1,…	319 (17)				APP		other	Activated	3.8	bias	1.54e-08	BMF,CALML4,CCND1,CCND2,EGR1,ELN,EVL,FGFR1,GBP2,GBP4,GBP6,GDF15,GPC1,H19,HAP1,HSPB1,IFIT1B,IGF2,IGF2BP2,IRF7,IRS2,ISG20,ITGA6,JUNB,LBP,LDHB,Ly6a (includes others),Meis1,NENF,NGFR,NR1D1,NR4A2,NTF3,PAK1,Pcp4l1,PDGFRA,PLAU,PRKCA,PTGDS,S100A8,SIRPA,SLC13A3,SLC1A2,SOX9,STXBP4,TLR7,TLR8,Tpm2,TRIB3,TUBA8,USP18,VCAM1,XAF1	226 (18)
RORA		ligand-dependent nuclear receptor	Activated	2.176	bias	2.44e-13	ABCG5,APOA4,BHMT,CDKN2A,Cyp2b13/Cyp2b9,CYP2B6,Cyp2c54 (includes others),Cyp3a25 (includes others),CYP3A5,CYP46A1,CYP4A11,Cyp4a14,ELOVL3,GSTM2,LCN2,LRTM1,Mt1,Mt2,NR1D1,NTRK2,PPARGC1A,PPP1R3C,RDH16,RHBG,Saa3,Scd2,SLC39A5,SULF2,Sult1a1,SULT2A1,Sult5a1,UCP2					PPARG		ligand-dependent nuclear receptor	Activated	2.739	bias	2.08e-08	ALDH1A2,CA2,CCND1,Cdkn1c,CORIN,CXCL14,CYP26A1,Cyp4a14,ELOVL3,FGF21,GDF15,IGFBP1,IHH,IRS2,LHPP,LPL,LY6D,MOGAT1,NDRG1,NR1D1,NR4A1,PACS1,PDK4,PF4,PLIN2,PPIC,Raet1c,S100A8,SAA1,SMO,SPP1,Tpm2,TRIB3,UCP2,VCAM1	225 (18)
IL1B		cytokine	Activated	4.798	bias	6.77e-13	ACPP,AIF1,ALPL,APCS,APOC2,AQP4,ATF3,BMF,CCRL2,CD83,Cdkn1c,CMPK2,CSF2RB,CYBA,CYP2B6,CYP3A5,EFNA1,EGR1,ELN,FERMT3,G0S2,GAS6,GBP2,GBP6,GDF15,H19,H2-L,Hamp/Hamp2,HES1,HLA-A,HSPB1,ICAM1,IFIT1B,IFIT3,IL15,IRF7,IRS2,ISG15,ISG20,ITGB3,JUNB,LBP,LCN2,Mt1,Mt2,NIBAN1,NQO1,NR1D1,NR4A1,NR4A2,NTRK1,OAS2,PDE4B,PDGFRA,PIM1,PLD1,PPARGC1A,PPP1R14A,PSMB9,PTGDS,RAC2,RGS16,SAA1,Saa3,SCNN1A,SLC25A4,Slfn2,SOX9,SPP1,STAT…	346 (17)				ACKR2		G-protein coupled receptor	Inhibited	-3.162	bias	6.58e-08	DDX60,Ifi27l2a/Ifi27l2b,IFI44,IFIT1B,IRF7,ISG15,ISG20,OAS1,Oasl2,USP18
DNASE2		enzyme	Inhibited	-2.606	bias	2.59e-12	Apol9a/Apol9b,DHX58,Hamp/Hamp2,IFIT1B,IFIT3,IRF7,ISG15,Ly6a (includes others),Mx1,OAS1,Oasl2,RTP4,USP18,ZBP1					TNF		cytokine	Activated	4.593	bias	6.88e-08	ADORA1,APOC2,AR,ATF3,BMPER,CA2,CASP6,CCND1,CCND2,CD83,CDH13,CDKN2A,CIB2,CLCF1,CLDN7,COL4A3,CYP17A1,EFNA1,EGR1,EMP2,FGFR1,GADD45B,GBP2,GBP4,GBP6,GDF15,GLS,H19,HLA-A,HSD3B2,IFIT1B,IGF2,IGFBP1,IL1RN,IRF7,IRS2,ISG15,ITGA6,JUNB,KRT23,LBP,LCN2,LPL,LY6D,LYVE1,MGST2,NGFR,NID1,NR4A1,NR4A2,OAS1,Orm1 (includes others),PDE7B,PDGFRA,PIM1,PLAU,PLIN2,PPP1R3C,PRKCA,RGS16,RGS2,RND1,ROBO1,S100A8,S100A9,SAA1,SERPIN…	199 (16)
APP		other	Activated	4.114	bias	3.04e-12	ACTA1,AIF1,ALDOC,ARRDC3,AXL,BMF,CALML4,CCND1,CD5L,CMPK2,CSF2RB,Ctla2a/Ctla2b,EGR1,ELN,EVL,FGFR1,GBP2,GBP4,GBP6,GDF15,GPC1,H19,HAP1,HES1,HSPB1,ICAM1,IFIH1,IFIT1B,IFIT2,IGF2,IGF2BP2,Igtp,IL15,IRF7,IRGM,IRS2,ISG20,ITGA6,ITGB3,JUNB,LBP,LDHB,LIMK1,Ly6a (includes others),Meis1,MME,Mt1,Mx1,NGFR,NR1D1,NR4A2,NTF3,PAK1,PDE4B,PDGFRA,PKM,PRKCA,PTGDS,PTPRC,RNASEL,RTP4,SIRPA,SOX9,STXBP4,TBC1D4,TGFBR2,Tgtp1/Tgt…	337 (19)				TRIM24		transcription regulator	Inhibited	-3.712	bias	7.74e-08	Apol9a/Apol9b,CA2,DDX60,GBP2,GBP4,Ifi27l2a/Ifi27l2b,IFI44,IFIT1B,IRF7,ISG15,Ly6a (includes others),OAS1,SPP1,TRIM6-TRIM34,USP18	113 (7)
NRAS		enzyme	Inhibited	-2.317	bias	3.16e-12	CCND1,CDKN2A,CDKN2B,CKM,EGR1,GBP2,HLA-A,HTRA1,Ifi202b,Ifi27,IFIH1,IFIT1B,IRX3,ISG15,LBP,LCN2,LIMK1,LY86,MEST,MKI67,NQO1,P3H4,PTP4A3,PTPRC,SERPINE2,SPRY4,STAT1,TAP1,Tgtp1/Tgtp2,TUBB2A,USP18	306 (22)				CREBBP		transcription regulator	Activated	2.419	bias	1.62e-07	AR,ARHGAP24,CA2,CAMK2B,CCND1,CCND2,EGR1,EVL,GIMAP1-GIMAP5,GRIA3,GRIN3B,HSD3B2,IFIT1B,IL2RB,ISG15,ITGA6,LPL,NDRG1,NR4A1,NR4A2,PLEKHA1,RASA3,RGS2,SCN4B,SERPINE2,SLC1A2,TUBA8,USP18,VCAM1	221 (24)
ACKR2		G-protein coupled receptor	Inhibited	-3.873	bias	7.43e-12	DDX60,DHX58,Ifi27l2a/Ifi27l2b,IFI44,IFIT1B,IFIT2,IFIT3,IRF7,ISG15,ISG20,OAS1,OAS2,Oasl2,STAT1,USP18	124 (7)				TMEM173		other	Activated	3.091	bias	2.36e-07	GAS7,HAP1,Ifi27l2a/Ifi27l2b,IFI44,IFIT1B,IRF7,ISG15,LCN2,OAS1,RGS16,USP18	167 (16)
CTNNB1		transcription regulator	Activated	4.694	bias	9.57e-12	ABCB1,AFP,ALDH1A2,AQP4,AR,BMF,BMP7,CASC4,CCND1,Cd52,Cdkn1c,CDKN2A,CDKN2B,CENPM,COL4A1,COL4A2,COL4A5,COMMD3-BMI1,CTDSPL,Cyp2d9 (includes others),CYP4F12,DCT,DOK1,EGR1,ELOVL3,FAM126A,GIPC1,HES1,HTRA1,IGF2,IHH,IRF8,ITGA6,ITGB2,LECT2,LMO2,LPL,LY6E,MFGE8,MME,MPEG1,NGFR,NR4A1,OAT,OLIG1,PDE4B,PEG3,PROM1,QPCT,RASSF4,SAA1,Saa3,SERPINE2,SIM2,SLC1A5,SORBS3,SOX4,SOX7,SOX9,SPI1,SPP1,SPRY4,SYK,TEAD2,TNIK,TULP3…	317 (22)				TGFB1		growth factor	Activated	4.034	bias	2.89e-07	ACPP,ADORA1,APOC2,ASNS,BMF,CALML4,CCND1,CCND2,CCRL2,CD72,CD83,Cdkn1c,CDKN2A,CDKN2B,COL4A1,COL4A2,CORIN,CYB561,CYP17A1,CYP21A2,EGR1,ELN,FBLN5,FGF21,FGFR1,FNDC5,GADD45B,GAS7,GBP2,GDF15,GLS,GNA14,GSTA5,GUCY2C,HSD3B2,HSPB1,HTRA1,IGF2,IL1RN,IL2RB,ITGA6,ITGA7,ITIH5,JUNB,LCN2,LPL,LTBP3,Ly6a (includes others),LYVE1,ME2,NR4A1,NR4A2,NUPR1,OLFM2,P2RY14,PDGFRA,PFN2,PIM1,PLAU,PPP1R3C,PRKCA,PROM1,PTGDS,RHOC,RN…	254 (24)
PTGER4		G-protein coupled receptor	Inhibited	-2.326		1.58e-11	APOC2,ARRDC3,CMPK2,Ctla2a/Ctla2b,EGR1,GBP2,GBP4,GBP6,ICAM1,IFIH1,IFIT1B,IFIT2,IGF2BP2,Igtp,IRF7,IRGM,ISG20,Mx1,RNASEL,RTP4,SPP1,STXBP4,TBC1D4,Tgtp1/Tgtp2,USP18,XAF1	327 (18)				AR	4.973	ligand-dependent nuclear receptor	Activated	2.334	bias	4.13e-07	ACPP,AR,BMF,CA5B,CCND1,Cdkn1c,CDKN2A,CLSTN1,CORIN,CYP17A1,EGR1,GDF15,HSD3B2,IGF2,ITGA6,Ly6a (includes others),NDRG1,NGFR,NUPR1,PDGFRA,PLAU,PRKCA,PTGDS,RHBG,SLC7A4,SOX9,SPP1,STEAP2,STK39,SULT2A1,Sult5a1,TFF3,ZBTB16	267 (20)
SOCS1		other	Inhibited	-4.468	bias	2e-11	CCND1,GBP5,GBP6,ICAM1,Ifi202b,IFI44,IFIH1,IFIT1B,IFIT2,IFIT3,IL15,IL2RB,IRF7,IRGM,IRS2,ISG15,ISG20,Mx1,OAS1,OAS2,Oasl2,RALGDS,STAT1,USP18,VCAM1	205 (15)				Ifnar		group	Activated	3.062	bias	4.82e-07	GBP2,H2-Q8,HLA-A,IFIT1B,IRF7,ISG15,ISG20,OAS1,SPP1,TLR7,USP18,VCAM1,XAF1	172 (15)
PML		transcription regulator	Activated	2.063		2.2e-11	CCND1,CDKN2A,CDKN2B,DDX60,DNAJA4,HLA-DMB,HSPB1,IFI44,IFIH1,IFIT3,IRF7,ISG15,ISG20,LPL,MCM6,Mx1,NDRG1,NQO1,OAS1,OAS2,PIK3C2A,PPARGC1A,PRKCA,PSMB9,STAT1,TAP1,UCP2	281 (20)				SOX3		transcription regulator	Inhibited	-2.714	bias	5.43e-07	BMPER,CYP26A1,GBP4,IRX3,Oasl2,PDGFRA,PEG3,SOX9,TEAD1,TEAD2,USP18,ZBTB16
TGFB1		growth factor	Activated	4.248	bias	2.48e-11	ACPP,ACTA1,AFP,ALDH18A1,APOC2,ARHGAP19,AXL,BMF,BMP7,C1QA,CALML4,CCND1,CCRL2,CD163,CD83,Cdkn1c,CDKN2A,CDKN2B,CDKN2C,CKM,COL4A1,COL4A2,CORIN,COTL1,CTSC,CYBA,CYP17A1,DOCK2,DOK1,EGR1,ELF4,ELN,FCGR3A/FCGR3B,FGFR1,FNDC5,FUT8,GABBR1,GAS7,GBP2,GDF15,GLS,GNA14,GUCY2C,Hamp/Hamp2,HES1,HSD3B2,HSPB1,HTRA1,ICAM1,IFIH1,IFIT3,IGF2,IL15,IL2RB,IMPDH1,INPP5D,ITGA6,ITGA7,ITGB2,ITGB3,JUNB,LCN2,LPL,Ly6a (includes othe…	373 (25)				NCOA2		transcription regulator	Activated	2.118	bias	5.59e-07	APOA4,APOC2,AR,CCND1,CYP17A1,CYP2B6,EGR1,IFIT1B,ISG15,LPL,NR1D1,PLIN2,PPP1R3C,Sult2a2	275 (25)
Ifn		group	Activated	3.565	bias	2.92e-11	CD83,CYP4A11,DHX58,HLA-A,ICAM1,Ifi202b,IFIH1,IL15,IRF7,IRF8,ISG15,ISG20,LCN2,Mx1,NTRK2,OAS2,RNASEL,SPP1,STAT1,TAP1,TLR2,TYMP,ZBP1	266 (19)				TREX1		enzyme	Inhibited	-2.359	bias	8.67e-07	Ifi27l2a/Ifi27l2b,IFI44,IFIT1B,ISG15,Ly6a (includes others),USP18
IFN alpha/beta		group	Activated	4.267	bias	3.29e-11	AXL,CCRL2,CD83,FGL2,GAS7,H2-Q8,HLA-A,Ifi27l2a/Ifi27l2b,IFIT2,IFIT3,IL15,IRF7,IRF8,Ly6a (includes others),LY6E,Mx1,STAT1,Tgtp1/Tgtp2,TLR2	256 (18)				EGR1	1.937	transcription regulator	Activated	2.918	bias	9.29e-07	AR,ATF3,CASP6,CCND1,CCND2,Cdkn1c,CYP17A1,EGR1,GADD45B,GDF15,IGF2,JUNB,NDRG1,NR4A1,PF4,PLAU,SPP1,VCAM1	232 (21)
SP1		transcription regulator	Activated	4.906	bias	1.06e-10	ABCB1,ABHD2,ADA,ADD3,ALPL,AR,ATF3,BAG2,BMP7,CCND1,CDKN2A,CDKN2B,CDKN2C,CRYBB3,CYP17A1,CYP26A1,CYP2B6,Cyp2d9 (includes others),EGR1,EZR,FGFR1,GDF15,GLTP,ICAM1,IGF2,IL15,IL2RB,ITGB3,KRT4,LPL,MAOA,Mt1,NDRG1,NGFR,NTRK1,PDGFC,PDGFRA,PIM1,PKM,PREX1,PRKCA,PROM1,RASGRP2,SERPINE2,SLC25A4,SOX9,SPP1,SRC,STAT1,TEAD1,TGFBR2,TGFBR3,TLR2	331 (19)				IFNAR1		transmembrane receptor	Activated	2.922	bias	1.06e-06	Apol9a/Apol9b,ATF3,CLIC5,GBP4,HLA-A,IFI44,IFIT1B,IRF7,ISG15,Ly6a (includes others),OAS1,Oasl2,TLR7,USP18,VCAM1,XAF1	156 (15)
TMEM173		other	Activated	3.795	bias	1.95e-10	GAS7,GBP5,HAP1,Ifi27l2a/Ifi27l2b,IFI44,IFIT1B,IFIT2,IFIT3,IRF7,ISG15,LCN2,Mx1,OAS1,PTPRC,RGS16,USP18	200 (16)				IGF1		growth factor	Activated	3.071	bias	1.31e-06	AQP4,CCND1,CCND2,CDKN2A,CYP17A1,EGR1,ELN,FGFR1,IGF2,IGFBP1,IHH,IRS2,JUNB,LCN2,LEPR,LPL,Ly6a (includes others),NR4A1,NTRK1,NTRK2,NUPR1,OSBPL7,PDGFRA,PDLIM2,PHC1,PIM1,PLAU,PPP3CC,SPP1,TXNIP,VCAM1	231 (22)
IFNA2		cytokine	Activated	5.227	bias	4.53e-10	CDKN2A,CDKN2B,CMPK2,DDX60,GBP2,GBP4,HLA-A,IFI44,IFIH1,IFIT2,IFIT3,IL2RB,IRF7,ISG15,ISG20,LY6E,NLGN2,NPDC1,NT5E,OAS1,OAS2,PARP12,SP110,STAT1,TAP1,THEMIS2,UBA7,USP18,VCAM1,XAF1,ZBP1	274 (20)				CHUK		kinase	Activated	3.878	bias	1.37e-06	ATF3,CCND1,CDH13,GADD45B,GBP2,GBP4,HLA-A,IFIT1B,IL1RN,ISG15,JUNB,LCN2,NID1,PLAU,RGS16,SERPINE2,SPP1,SRC,VCAM1	177 (15)
IL6		cytokine	Activated	4.52	bias	6.7e-10	AFP,APCS,AQP4,ATF3,ATP2A1,BTC,CCND1,CD163,CD83,CDKN2A,CDKN2B,CFP,CIB2,CSF2RB,CSF3R,CTSC,CYP2B6,CYP3A5,EGR1,GBP2,H2-Q8,Hamp/Hamp2,HLA-A,ICAM1,Ifi202b,IFIT1B,IFIT2,IGF2,IL15,IL2RG,ITGB3,JUNB,LBP,LCN2,LPL,LY86,MKI67,MRAS,Mt1,Mt2,NUCB2,Orm1 (includes others),PIM1,PROM1,PSMB9,PTP4A3,PTPRC,RAB27A,SAA1,Saa3,SCNN1A,SERPINA7,SLC7A7,SMOX,SP110,SPI1,SPP1,SRC,STAT1,TAP1,TLR2,TOP2A,VCAM1	328 (19)				CASR		G-protein coupled receptor	Activated	2.853	bias	1.39e-06	CCND1,CCND2,COL4A1,COL4A2,CYP2B6,EGR1,ISG15,LPL,NUPR1,PDLIM2,S100A8,S100A9,SRC,TXNIP,UCP2	224 (25)
MYC		transcription regulator	Activated	3.245	bias	1.11e-09	ABCB9,ABCC4,ACTA1,AFP,ALDH18A1,AR,AXL,BMPER,CCND1,CD9,CDKN2A,CDKN2B,CLDN7,COL4A1,COL4A2,COMMD3-BMI1,CTDSPL,CYP26A1,EGR1,EZR,FGFR1,FMOD,FOXF1,FUT8,GBP2,GBP4,GLS,GPC1,GPC3,H19,HES1,HLA-A,HSPB1,ICAM1,IFI44,IFIH1,IFIT2,IFIT3,IRF7,IRX3,ISG20,ITGA6,LDHB,Ly6a (includes others),MCM6,ME2,MKI67,Mt1,Mt2,MYLPF,NDRG1,NIBAN1,NQO1,OAS1,Oasl2,OAT,OLIG1,PAK1,PDGFRA,PEG3,PKM,PPL,PRKCA,PROM1,PTPRC,Scd2,SCPEP1,SERPI…	339 (22)				VDR		transcription regulator	Activated	3.008		1.84e-06	CCND1,CCND2,COL4A1,COL4A2,CYP2B6,EGR1,IL1RN,ISG15,LPL,NUPR1,PDLIM2,PLD1,PLIN2,S100A8,S100A9,SPP1,SRC,SULT2A1,TXNIP,UCP2	260 (25)
FZD9		G-protein coupled receptor	Activated	2.969	bias	1.39e-09	Ifi202b,Ifi27l2a/Ifi27l2b,IFI44,IFIT1B,IRF7,ISG15,Oasl2,SPRY4,STAT1					SOCS1		other	Inhibited	-3.673	bias	2.01e-06	CCND1,CCND2,GBP6,Ifi202b,IFI44,IFIT1B,IL2RB,IRF7,IRS2,ISG15,ISG20,OAS1,Oasl2,USP18,VCAM1	174 (14)
PTCH1		transmembrane receptor	Inhibited	-2.556	bias	1.7e-09	ACTA1,CCND1,DLL1,ERBB4,FOXF1,IGF2,PDGFRA,SOX9,TNNI2,TNNT3,Tpm2	25 (2)				PDGF BB		complex	Activated	2.458	bias	2.33e-06	ATF3,CCND1,EGR1,FBLN5,FGFR1,GBP2,GDF15,H19,IGF2,JUNB,LBP,MCM6,MGST2,NR4A1,NR4A2,PDGFRA,PFN2,PIM1,PLAU,RGS2,Scd2,TRIB3,UNC5B,VCAM1	213 (21)
mir-21		microRNA	Inhibited	-3.75	bias	1.74e-09	AIF1,CCND1,CDKN2A,CDKN2B,CSF3R,DHX58,EIF4E3,ELN,FGL2,GBP2,GBP5,GBP6,GBP7,ICAM1,INPP5D,IRGM,LEPR,MARCO,MKI67,NLRC5,OAS2,Orm1 (includes others),PILRB,SIGLEC1,Slfn2,STAT1,TAP1,Tgtp1/Tgtp2,TLR2,TOP2A,TYMP,UBA7,VCAM1	299 (22)				CEBPA		transcription regulator	Activated	2.475	bias	2.55e-06	APOA4,ASNS,BHMT,CA2,CCND1,CCND2,CYP2B6,CYP3A5,IL1RN,IRS2,ISG15,JUNB,LCN2,LEPR,LPL,Ly6a (includes others),NR4A2,Orm1 (includes others),PFN2,PLIN2,PPP1R3C,RGS2,S100A8,S100A9,SAA1,SERPINB1,SPP1,SULT2A1,Sult2a2	267 (25)
MAVS		other	Activated	3.944	bias	1.78e-09	ALPL,CMPK2,DHX58,IFIT1B,IFIT2,IFIT3,IRF7,ISG15,ISG20,OAS1,OAS2,Oasl2,PARP12,SPP1,STAT1,USP18	140 (12)				ERBB2		kinase	Activated	3.201	bias	2.71e-06	AR,CCND1,CCND2,CD9,CDCP1,CDKN2A,CDKN2B,CLDN7,COL4A1,COMMD3-BMI1,CYB561,EGR1,ERBB4,GBP6,GLS,GPC1,GPX3,GSPT2,H19,HSPB1,HTRA1,IGF2,IRX3,ITGA6,JUNB,LCN2,LTBP3,MCM6,NDRG1,NID1,PDK4,PFN2,PLAU,PLIN2,PROM1,RASA3,SIRPA,SOX4,SRC,ST3GAL6,UGT1A6	240 (22)
IFNA1/IFNA13		cytokine	Activated	3.641	bias	5.29e-09	AR,CD83,DHX58,IFIH1,IFIT2,IRF7,ISG15,Mx1,OAS1,OAS2,SIGLEC1,STAT1,Tgtp1/Tgtp2,ZBP1	237 (19)				PI3K (complex)		complex	Activated	2.666	bias	4.09e-06	ATF3,CCND1,CCND2,CDKN2B,FBLN5,GSTA5,H19,IGF2,IGFBP1,IL1RN,ITGA6,LCN2,NR4A2,PIM1,RASA3,RFX4,RGS2,SOX9,SPP1,TXNIP,TYMP,VCAM1	215 (23)
CREBBP		transcription regulator	Activated	3.22	bias	5.55e-09	AP3M2,AR,ARHGAP24,BMP7,CA2,CAMK2B,CCND1,CKM,EGR1,EVL,FMNL2,GIMAP1-GIMAP5,GRIA3,GRIN3B,HSD3B2,IFIT1B,IL2RB,ISG15,ITGA6,LPL,NDRG1,NR4A1,NR4A2,PKHD1,PPARGC1A,PSMB9,RASA3,RGS2,RNASEL,RTP4,SCN4B,SERPINE2,SLC43A1,SMPD3,TLR2,TMPRSS2,TUBA8,USP18,VCAM1	296 (20)				IFN alpha/beta		group	Activated	2.729	bias	4.4e-06	CCRL2,CD83,CXCL14,GAS7,H2-Q8,HLA-A,Ifi27l2a/Ifi27l2b,IRF7,Ly6a (includes others),LY6E,TLR7	190 (16)
CHUK		kinase	Activated	4.541	bias	7.57e-09	ACKR3,ATF3,CCND1,CDH13,CYBA,GBP2,GBP4,HLA-A,ICAM1,IFIT1B,IFIT2,ISG15,ITGB3,JUNB,LCN2,Mt1,Mt2,NID1,RGS16,Saa3,SERPINE2,Slfn2,SMOC2,SPP1,SRC,TNFAIP2,VCAM1	295 (14)				IRF7	1.583	transcription regulator	Activated	3.9	bias	5.01e-06	CCRL2,GBP4,IFI44,IFIT1B,IRF7,ISG15,ISG20,Ly6a (includes others),OAS1,Oasl2,S100A8,TLR8,TNFAIP8,Trim30a/Trim30d,USP18,XAF1	119 (12)
TGM2		enzyme	Activated	4.427	bias	8.97e-09	ACTA1,ALPL,CA2,CCND1,CCRL2,CFP,DDX60,GCA,IFIT2,IFIT3,ITGA6,ITGB3,LRRC25,LY6E,MYO9A,OAS1,OAS2,PAK1,PIM1,SAMD9L,SIRPA,SP110,SPP1,STAT1,TAP1,TNFAIP2,UBA7,XAF1	243 (13)				AGT		growth factor	Activated	3.383	bias	5.47e-06	ATF3,CCND1,CCND2,CDH13,CDKN2A,COL4A1,CYP17A1,Cyp4a14,EGR1,FBXO21,GRK5,GSTA5,HSD3B2,HSPB1,ITGA7,LEPR,MATN2,NDRG1,NR4A1,NR4A2,PLAU,PPP1R3C,RGS2,SOX4,SPP1,TXNIP,UCP2,VCAM1,WNK4	213 (19)
AR	7.432	ligand-dependent nuclear receptor	Activated	2.977	bias	1.18e-08	ABCC4,ACPP,ACTA1,AR,BMF,CA5B,CCND1,Cdkn1c,CDKN2A,CLSTN1,CORIN,CUX2,CYP17A1,EGR1,GAS6,GDF15,HSD3B2,IGF2,ITGA6,Ly6a (includes others),MAOA,MME,MRAS,NDRG1,NGFR,NUPR1,PDGFRA,PRKCA,PTGDS,RHBG,SLC43A1,SLC7A4,SOX9,SPP1,STAT1,STEAP2,STK39,SULT2A1,Sult5a1,TFF3,TGFBR2,TMPRSS2,TNFAIP2,ZBP1,ZBTB16	326 (20)				APOE		transporter	Inhibited	-2.19	bias	7.26e-06	ABCA2,ATF3,CCND1,CCND2,CYP3A5,DIP2A,EGR1,GAS7,GPX3,GRIA3,IL1RN,KREMEN1,LCN2,LPL,PLAU,S100A8,S100A9,SPP1,Tpm2,TXNIP,UCP2,VCAM1,WNT2	191 (21)
RNY3		other	Activated	3.162	bias	1.25e-08	DDX60,IFI44,IFIT3,ISG15,LY6E,OAS1,OAS2,RTP4,SIGLEC1,XAF1					PRL		cytokine	Activated	2.97	bias	7.29e-06	CCND1,DNAJA4,EGR1,ERBB4,IFI44,IGF2,IRF7,ISG15,LY6E,LYVE1,Meg3,MFGE8,NUPR1,OAS1,PDGFRA,PDK4,PIM1,PTPN18,SPP1,USP18,XAF1	219 (21)
STAT2		transcription regulator	Activated	2.39	bias	1.39e-08	GBP6,IFIT1B,IFIT2,IFIT3,IRF7,ISG15,Mx1,OAS1,OAS2,Oasl2,RTP4,STAT1,USP18,ZBP1	218 (17)				CEBPB		transcription regulator	Activated	2.152	bias	7.36e-06	ALDH1A2,ASNS,BHMT,CCND1,CCND2,CDKN2B,CYP17A1,HLA-A,HSD3B2,IGFBP1,IL1RN,IRS2,LBP,LCN2,LCP2,LEPR,NUPR1,Orm1 (includes others),PDGFRA,PDK4,SAA1,SIM2,SPP1,SULT2A1,TLR8,TRIB3,UGT1A6	221 (20)
DDX58		enzyme	Activated	3.781	bias	1.8e-08	ALPL,DLL1,IFI44,IFIH1,IFIT1B,IFIT2,IFIT3,IRF7,IRF8,ISG15,ISG20,Mx1,OAS1,SPP1,STAT1	140 (12)				MAVS		other	Activated	2.96	bias	7.53e-06	ALPL,IFIT1B,IRF7,ISG15,ISG20,OAS1,Oasl2,SPP1,TLR7,USP18	101 (12)
MYD88		other	Activated	5.067	bias	2.27e-08	ACPP,ALDH1A2,APCS,APOBEC3B,CCRL2,CD83,CMPK2,EGR1,GDF15,HCK,HLA-A,ICAM1,IFIT1B,IFIT2,IL15,INPP5D,IRF7,IRF8,ISG15,MARCO,MKI67,MLH1,PDE4B,SAA1,Saa3,SPP1,TLR2,USP18,VCAM1,ZAP70	332 (20)				PPARGC1A	1.413	transcription regulator	Activated	2.385		8.12e-06	APOA4,APOC2,BMPER,CXCL14,CYP2B6,CYP3A5,FAM20A,FGF21,FNDC5,GDF15,HSD3B2,IL1RN,IRS2,LDHB,LPL,MCM6,OXCT1,PDK4,PLIN2,PODN,SERPINE2,SULT2A1,TRIB3,UCP2	215 (17)
TNFSF11		cytokine	Activated	3.944	bias	2.27e-08	AIF1,ATP6V0D2,CA2,CCND1,CD83,DMPK,FERMT3,GRB10,HCK,ICAM1,IL15,IRF8,ITGB3,JUNB,LIMK1,PIM1,PLD1,RALGDS,RGS16,SAA1,Saa3,SH3PXD2A,SLC7A7,Slfn2,SPP1,SRC,STAT1,TLR2,USP18,VCAM1	311 (20)				INSIG1		other	Inhibited	-3.162	bias	8.27e-06	IRS2,LCN2,LPL,MARCO,PLD1,PLIN2,RAB27A,S100A8,S100A9,Scd2,STEAP2,UCP2	64 (4)
NR1H3		ligand-dependent nuclear receptor	Activated	2.042		2.46e-08	ABCG5,APCS,APOC2,ATF3,C1QA,CD5L,CTSC,DDX60,FGL2,GAS6,GBP4,GPX3,IFIT2,IRF7,ITGB3,LAIR1,LCP2,LPL,LY86,MFGE8,MKI67,Mt1,Mt2,PPARGC1A,TAP1,TOP2A,ZBP1	203 (13)				SAV1		other	Inhibited	-2.4	bias	8.29e-06	CCND1,CDKN2A,COL4A1,GPC3,SOX4,SPP1
CSF2		cytokine	Activated	5.025	bias	3.1e-08	ADA,CCND1,CD163,CD276,CD63,CD83,CDKN2B,CDKN2C,CLCF1,CLEC6A,CSF2RB,CTSC,EGR1,ELN,GDF15,ICAM1,IL15,INPP5D,ITGB3,JUNB,LY75,LY9,MARCO,MCM6,MFSD2A,MKI67,MLH1,MME,NR4A1,NR4A2,PDE4B,PIM1,PLD1,Saa3,SLC1A5,Slfn2,SPI1,SPP1,TIFA,TLR2,TOP2A,TRIB2,ZNF25	368 (20)				Interferon alpha		group	Activated	4.098	bias	8.67e-06	ATF3,CCND1,CCND2,CD83,CYB561,GBP2,GBP6,GLS,HLA-A,IFI44,IFIT1B,IL1RN,IRF7,ISG15,ISG20,OAS1,Oasl2,PIM1,S100A9,SERPINB1,SLC1A5,TLR7,TLR8,TYMP,USP18,VCAM1,WDFY1,ZNRF3	177 (15)
miR-199a-5p (and other miRNAs w/seed CCAGUGU)		mature microRNA	Inhibited	-3.86	bias	3.26e-08	ACTA1,BCAM,CMPK2,COL4A1,COL4A5,ISG15,ITGB3,LCN2,RND1,SAMD9L,TGFBR2,TGFBR3,TMPRSS2,ZBP1,ZBTB16					TLR3		transmembrane receptor	Activated	3.914	bias	8.84e-06	ATF3,CPM,GADD45B,GBP2,GBP4,Ifi202b,IFI44,IL1RN,IRF7,ISG15,ISG20,JUNB,LCN2,NR4A1,OAS1,Oasl2,S100A8,TLR7,TSPAN33,USP18	134 (12)
TLR4		transmembrane receptor	Activated	4.325	bias	3.41e-08	ACPP,ACTA1,APOBEC3B,ATF3,CD163,CERK,CMPK2,CYP3A5,EFNA1,FGL2,GBP2,HTRA1,ICAM1,IFIT1B,IFIT2,IFIT3,Igtp,IL15,IL2RB,IRF7,IRF8,IRGM,ISG15,ISG20,LCN2,MARCO,Mx1,NR4A1,NR4A2,PAK1,RGS16,SPP1,STAT1,TLR2,Trim12a,VCAM1,Wfdc17	246 (17)				IFNA2		cytokine	Activated	3.998	bias	8.89e-06	CDKN2A,CDKN2B,DDX60,GBP2,GBP4,HLA-A,IFI44,IL2RB,IRF7,ISG15,ISG20,LY6E,NLGN2,NPDC1,OAS1,UGT1A6,USP18,VCAM1,XAF1	189 (16)
IFN Beta		group	Activated	4.165	bias	3.42e-08	ATF3,CD83,HLA-A,IFI44,IFIH1,IFIT1B,IFIT2,IFIT3,IL15,IRF7,ISG15,Mt2,Mx1,OAS1,OAS2,PRKCA,SPRY4,STAT1,USP18,XAF1,ZBP1	148 (14)				TLR9		transmembrane receptor	Activated	3.348	bias	1e-05	ATF3,CCND1,CD83,CERK,CPM,EGR1,GADD45B,Ifi202b,IFIT1B,IRF7,ISG15,ISG20,LCN2,NR4A1,Oasl2,S100A8,TLR7,USP18,ZAP70	148 (19)
CGAS		enzyme	Activated	2.956	bias	3.87e-08	IFI44,IFIT1B,IFIT2,IFIT3,IRF7,ISG15,Mx1,OAS1,USP18	134 (12)				SOX1		transcription regulator	Inhibited	-2.53	bias	1.11e-05	BMPER,CYP26A1,GBP4,IRX3,Oasl2,PDGFRA,PEG3,TEAD1,TEAD2,USP18
LLGL2		other	Activated	3.162	bias	4.04e-08	AXL,CDKN2C,EMP2,GAS6,GLS,ITGB2,NDRG1,SH2D4A,TOP2A,TSPAN3					ATF4		transcription regulator	Activated	3.613	bias	1.2e-05	ABCG5,ARHGAP24,ASNS,ATF3,CDKN2A,CHAC1,FGF21,GDF15,GRB10,IHH,NDRG1,NUPR1,PEG3,SLC1A5,TRIB3	121 (7)
IRF5		transcription regulator	Activated	3.49	bias	5.78e-08	CMPK2,COL4A1,DHX58,IFI44,IFIH1,IFIT2,IFIT3,IRF7,ISG15,ISG20,OAS1,OAS2,Oasl2,PARP12,SP110,STAT1	168 (18)				CG		complex	Activated	3.253	bias	1.29e-05	ACPP,AR,BHMT,BLM,BTC,CCND2,CYP17A1,CYP26A1,EGR1,FAM110C,GBP6,GPC1,HLA-A,HSD3B2,IRS2,JUNB,LEPR,MYCL,NR4A1,Oasl2,PLAU,RGS2,SPP1,SULT2A1	152 (16)
PARP9		enzyme	Activated	2.804	bias	6.83e-08	IFI44,IFIT2,IFIT3,IRF7,ISG15,OAS2,SP110,STAT1	108 (7)				GATA1		transcription regulator	Activated	2.727	bias	1.3e-05	ABCA2,CA2,CCND1,CCND2,CDKN2A,EGR1,ITGA6,JAZF1,JUNB,LEPR,LMO2,Meis1,MGST2,NR4A2,PF4,PHC1,PIM1,SLC19A1,SRC,ST3GAL6,TFF3	190 (18)
PRL		cytokine	Activated	3.863	bias	7.15e-08	BOK,CCND1,CMPK2,DHX58,DNAJA4,EGR1,ERBB4,IFI44,IFIH1,IFIT3,IGF2,IRF7,ISG15,LY6E,Meg3,MFGE8,MLKL,MME,NUPR1,OAS1,OAS2,PARP12,PDGFRA,PIM1,SAMD9L,SP110,SPP1,STAT1,USP18,XAF1	286 (21)				CGAS		enzyme	Activated	2.44	bias	1.48e-05	IFI44,IFIT1B,IRF7,ISG15,OAS1,USP18	119 (9)
NFKBIA		transcription regulator	Activated	2.636	bias	1.18e-07	ACKR3,ATP11A,AXL,BOK,CCND1,CDH13,Cdkn1c,CYBA,GBP2,GPX3,GRK5,HES1,HLA-A,HOXA10,ICAM1,IFIT1B,IGF2,IL15,IRX3,ISG15,JUNB,LCN2,LY6E,MFGE8,Mt1,Mt2,NID1,NR4A1,PIM1,RASA3,RGS16,Saa3,SERPINE2,Slfn2,SOX9,TLR2,TNFAIP2,TNFAIP8,VCAM1	326 (17)				CD44		other	Activated	2.54	bias	1.56e-05	ABCA2,CCND1,CCND2,CD63,IL1RN,KREMEN1,LHX6,Ly6a (includes others),LY6D,MOGAT1,PLAU,SPP1,SRC,TLR8,Tpm2,VCAM1,WNT2	164 (17)
SASH1		other	Activated	3.742	bias	1.35e-07	ACPP,CMPK2,FGL2,IFIT1B,IFIT2,IFIT3,IL15,IRF7,IRGM,ISG15,ISG20,MARCO,STAT1,Trim12a					EGF		growth factor	Activated	3.523	bias	1.57e-05	AR,ATF3,CCND1,CCND2,CDKN2A,CLDN7,CXCL14,CYP21A2,CYP2B6,EGR1,EZR,FGFR1,GAL3ST1,HSD3B2,IGF2,IGFBP1,JUNB,LCN2,NR4A1,NR4A2,PDK4,PLAU,PROM1,Raet1d/Raet1e,S100A9,Scd2,SLC1A2,SOX4,SPP1,VCAM1	227 (19)
TICAM1		other	Activated	4.391	bias	1.46e-07	APOBEC3B,CCRL2,CMPK2,EGR1,GDF15,ICAM1,IFIT1B,IFIT2,IFIT3,Igtp,IL15,IRF7,IRGM,ISG15,ISG20,MKI67,Mx1,PDE4B,TLR2,VCAM1	139 (12)				Brd4		kinase	Activated	2.828	bias	1.66e-05	COL4A1,COL4A2,COL4A3,COL4A5,PLAU,SPON2,TLR8,WFDC2
SMARCA4		transcription regulator	Activated	5.11	bias	1.59e-07	ABCB1,ABHD2,ACTA1,AFP,ANO1,AP3M2,ARHGAP30,ATP2A1,CCND1,CCRL2,CD63,CDKN2A,CDKN2B,CFP,CKM,CLCF1,COMMD3-BMI1,COTL1,CPM,CYP26A1,DCT,DLL1,EGR1,ICAM1,ITGA7,KIFAP3,LPXN,MFGE8,Mt1,MYLPF,NAP1L3,OXCT1,PDE4B,PLS1,PSMB9,RAB27A,RAC2,RGS2,SERPINE2,SPP1,STAMBPL1,SYK,TAP1,TLR2,TNFAIP8,TNNC2,TNNI2,TNNT3,ZNF503	329 (19)				HGF		growth factor	Activated	3.182	bias	1.83e-05	ASNS,ATF3,CCND1,CDKN2A,CDKN2B,CLCF1,COL4A1,CYP17A1,CYP2B6,EGR1,EMP2,GRB10,GRK5,HLX,ISG15,ISG20,ITGA6,LCN2,LYVE1,NR4A1,NR4A2,PIM1,PLAU,RGS2,S100A9,SLC1A2,SPP1,STK10,VCAM1	197 (18)
IGF1		growth factor	Activated	3.115	bias	1.89e-07	ACTA1,ADA,AQP4,ATP2A1,C1QA,CCND1,CDKN2A,CYBA,CYP17A1,EGR1,ELN,FGFR1,ICAM1,IGF2,IHH,IL2RG,IRS2,JUNB,LCN2,LEPR,LPL,Ly6a (includes others),MKI67,NR4A1,NTRK1,NTRK2,NUPR1,OSBPL7,PDGFRA,PDLIM2,PHC1,PIM1,PKM,PPP3CC,PSMB9,PTPRC,SLC12A6,SPP1,TAP1,TXNIP,VCAM1	344 (22)				ATF2		transcription regulator	Activated	2.404	bias	1.88e-05	ASNS,ATF3,CCND1,CDKN2A,EGR1,FGF21,MEIS2,NUPR1,PDGFRA,PLAU,VCAM1	191 (14)
NKX2-3		transcription regulator	Inhibited	-2.538		1.96e-07	ALPL,CERK,CMPK2,DDX60,DHX58,GBP2,GCA,GDF15,LY6E,PARP12,PLD1,PSMB9,RTP4,SAMD9L,SERPINE2,SP110,STAT1,TAP1,TFF3,TYMP,UBA7,USP18,VCAM1,XAF1,ZNF704					NFkB (complex)		complex	Activated	4.607	bias	2.36e-05	ATF3,CCND1,CCND2,CD83,CLCF1,CYP3A5,DTX3,EFNA1,EGR1,GADD45B,GBP2,GDF15,GRK5,HLA-A,HSPB1,IL1RN,IRF7,ISG15,JUNB,LCN2,NR1D1,NTF3,PLAU,PLD1,RGS16,SAA1,SH3RF1,SLC1A2,SLC2A5,SPP1,STK10,TNFAIP8,TRIB3,VCAM1	208 (17)
ELAVL1		other	Activated	3.207	bias	2.12e-07	ATF3,CD83,GBP6,H2-K2/H2-Q9,H2-L,H2-Q8,HLA-A,Ifi27,IFI44,IFIH1,MPEG1,OAS1,OAS2,PLCG2,PROM1,PTPRC,SLC39A5,SLC7A7,Slfn2,STAT1,Tgtp1/Tgtp2,TOP2A,USP18,VCAM1	198 (13)				TREM1		transmembrane receptor	Activated	3.011	bias	3.16e-05	ASNS,ATF3,CCRL2,CD83,CDKN2B,EGR1,GADD45B,HTRA4,ISG15,LPL,LRFN4,LY9,NR4A2,PLD1,RGS16,SPP1	209 (22)
Insulin		group	Activated	2.323	bias	2.8e-07	ACTA1,ATF3,CCND1,CDKN2B,COL4A1,CYP17A1,EGR1,ELOVL3,GRB10,GUCY2C,HAP1,HES1,HSD3B2,ICAM1,IFIT2,IFIT3,IGF2,IRF7,IRS2,ITGB3,LEPR,LPL,MAOA,MCM6,NR4A1,NR4A2,NUCB2,Orm1 (includes others),PDGFRA,PKM,PPARGC1A,PPIC,PRKCA,RDH5,Scd2,SLC25A27,SLC2A5,STAT1,TLR2,UCP2	370 (22)				NSD2		enzyme	Activated	2	bias	3.3e-05	CA2,CCND2,IFIT1B,IGF2BP2,IRF7,OAS1,PRKCA
NCOA2		transcription regulator	Activated	2.622	bias	3.02e-07	APOA4,APOC2,AR,CCND1,CYP17A1,CYP2B6,Cyp2c40 (includes others),EGR1,IFIT1B,IFIT2,ISG15,LECT2,LPL,Mx1,NR1D1,PPP1R3C,Sult2a2	392 (28)				TLR4		transmembrane receptor	Activated	2.756	bias	3.34e-05	ACPP,ATF3,CCND2,CERK,CYP3A5,EFNA1,GBP2,HTRA1,IFIT1B,IL2RB,IRF7,ISG15,ISG20,LCN2,LHX2,MARCO,NR4A1,NR4A2,PAK1,RGS16,SPP1,Trim12a,TSPAN33,VCAM1	197 (15)
TREX1		enzyme	Inhibited	-2.542	bias	3.1e-07	Ifi27l2a/Ifi27l2b,IFI44,IFIT1B,IFIT2,ISG15,Ly6a (includes others),USP18					RELA		transcription regulator	Activated	2.838	bias	3.34e-05	AR,CCND1,CDKN2A,CYP17A1,CYP2B6,EGR1,ELN,GDF15,GRK5,IFIT1B,IL1RN,IRF7,ISG15,JUNB,NR4A1,NR4A2,PLAU,PLD1,PTGDS,SAA1,SERPINE2,SLC1A2,SLC2A5,SOX9,SYTL1,VCAM1	192 (16)
IFNL4		cytokine	Activated	2.427	bias	3.31e-07	DHX58,IFIH1,ISG15,OAS1,OAS2,STAT1	138 (9)				GMNN		transcription regulator	Inhibited	-2.53	bias	3.48e-05	BMPER,CYP26A1,GBP4,IRX3,Oasl2,PDGFRA,PEG3,TEAD1,TEAD2,USP18
IFNAR2		transmembrane receptor	Activated	2.236	bias	3.82e-07	GBP4,IFI44,IFIH1,ISG15,Mx1,OAS1,OAS2,PSMB9,UBA7,USP18,XAF1	251 (16)				ZBTB20		transcription regulator	Inhibited	-2.121		3.57e-05	Cyp2b13/Cyp2b9,CYP2B6,CYP3A5,GPC3,IGFBP1,LDHB,LEPR,PDK4
ERBB2		kinase	Activated	2.613	bias	3.91e-07	ACTA1,ALDOC,AR,BAG2,BMP7,CCND1,CD9,CDCP1,CDKN2A,CDKN2B,CDKN2C,CLDN7,COL4A1,COMMD3-BMI1,DLL1,DOK1,EGR1,ERBB4,GAS6,GBP6,GLS,GPC1,GPX3,GSPT2,H19,HES1,HSPB1,HTRA1,IGF2,IRX3,ITGA6,ITGB3,JUNB,LCN2,MAOA,MCM6,MKI67,MME,NDRG1,NID1,NUCB2,PBX1,PIK3CD,PROM1,PSMB9,RASA3,SIRPA,SOX4,SRC,ST3GAL6,Sult1a1,TAP1,THSD1,TNNT3,TOP2A	323 (20)				MYD88		other	Activated	4.008	bias	3.89e-05	ACPP,ALDH1A2,BLM,CCRL2,CD83,EGR1,GDF15,HLA-A,IFIT1B,IL1RN,IRF7,ISG15,MARCO,S100A8,SAA1,SPP1,USP18,VCAM1,ZAP70	204 (17)
TLR9		transmembrane receptor	Activated	3.832	bias	4.77e-07	ATF3,CCND1,CD83,CERK,CPM,EGR1,Hamp/Hamp2,ICAM1,Ifi202b,IFIT1B,IFIT2,IFIT3,IRF7,ISG15,ISG20,LAIR1,LCN2,Mx1,NR4A1,OAS2,Oasl2,Saa3,STAT1,USP18,Wfdc17,ZAP70	142 (12)				RNY3		other	Activated	2.449	bias	3.99e-05	DDX60,IFI44,ISG15,LY6E,OAS1,XAF1
IRF1		transcription regulator	Activated	4.041	bias	6.17e-07	CCND1,CMPK2,FGL2,GBP2,H2-L,IFI44,IFIH1,IFIT2,IFIT3,IL15,IRF7,ISG15,MAP4K4,OAS1,OAS2,PSMB9,SP110,SPI1,STAT1,TAP1,VCAM1,XAF1	273 (19)				ECSIT		transcription regulator	Activated	2.39	bias	3.99e-05	CD83,IL1RN,IRF7,JUNB,NR4A2,PIM1	134 (9)
SOX3		transcription regulator	Inhibited	-3.051	bias	6.33e-07	BMPER,CYP26A1,DLL1,FOXF1,GBP4,IRX3,Oasl2,PDGFRA,PEG3,SOX9,TEAD1,TEAD2,USP18,ZBTB16					Ifn		group	Activated	2.423	bias	4.25e-05	CD83,HLA-A,Ifi202b,IRF7,ISG15,ISG20,LCN2,NTRK2,S100A8,SPP1,TLR7,TYMP	192 (16)
NSUN6		enzyme	Activated	3.162	bias	6.44e-07	AXL,CDKN2C,COL4A3,EMP2,GAS6,GLS,ITGB2,NDRG1,TOP2A,TSPAN3					OSM		cytokine	Activated	3.139	bias	4.44e-05	ASNS,ATF3,BTC,CADM4,CCND1,CCND2,CPM,CYP3A5,EGR1,GAS7,GBP2,HLA-A,IRF7,ISG20,JUNB,LBP,LCN2,LDLRAD4,LY6D,OAS1,PLAU,PPP3CC,S100A8,S100A9,SAA1,SERPINB1,SLC16A6,SPP1,TYMP,VCAM1	207 (19)
TLR3		transmembrane receptor	Activated	4.49	bias	6.53e-07	ATF3,CMPK2,CPM,DHX58,GBP2,GBP4,Hamp/Hamp2,ICAM1,Ifi202b,IFI44,IFIH1,IFIT2,IFIT3,IL15,IRF7,ISG15,ISG20,JUNB,LCN2,Mx1,NR4A1,OAS1,Oasl2,PIK3CD,Saa3,STAT1,USP18	149 (11)				SOX9	1.842	transcription regulator	Activated	2.209	bias	4.53e-05	AR,COMMD3-BMI1,GAS7,H19,IHH,LBP,PRKCA,PTGDS,SOX9	133 (9)
JAK1		kinase	Activated	3.257	bias	6.57e-07	BMF,HLA-A,ICAM1,IFIT2,IRF7,JUNB,Oasl2,Orm1 (includes others),PSMB9,SAA1,STAT1,TAP1,USP18	269 (18)				IFNL1		cytokine	Activated	2.96	bias	4.74e-05	ATF3,CD83,CHAC1,DDX60,IFI44,ISG15,ISG20,OAS1,USP18,XAF1	158 (11)
RELA		transcription regulator	Activated	4.047	bias	7.63e-07	ABCB1,AFP,AR,CCND1,CDKN2A,CYP17A1,CYP2B6,EGR1,ELN,GDF15,GRK5,HES1,ICAM1,IFIT1B,IRF7,ISG15,JUNB,Mx1,NR4A1,NR4A2,OAS2,PDE4B,PKM,PLD1,PSMB9,PTGDS,SAA1,Saa3,SERPINE2,SLC2A5,SMOC2,SOX9,SPI1,TAP1,TLR2,TNFAIP2,VCAM1	324 (18)				PIK3R1		kinase	Activated	2.543	bias	4.74e-05	AR,CCND1,CCND2,IRF7,ISG15,PDGFRA,PLAU,TRIB3,TXNIP,VCAM1	193 (18)
NOS2		enzyme	Activated	2.009		8.89e-07	ACTA1,AR,COL4A1,CSF3R,CTSC,GSPT2,H19,H2-T10,IFIT1B,IFIT3,IRS2,ISG15,KRT4,LCN2,MB,Orm1 (includes others),PPARGC1A,Saa3,SLC1A5,Slfn2,Tgtp1/Tgtp2,TNNT3	337 (23)				DDX58		enzyme	Activated	2.393	bias	5.7e-05	ALPL,IFI44,IFIT1B,IRF7,ISG15,ISG20,LTBP3,OAS1,SPP1	101 (12)
ROR1		kinase	Activated	3	bias	1e-06	AXL,CDKN2C,EMP2,GAS6,GLS,ITGB2,NDRG1,TOP2A,TSPAN3	33 (3)				IFN Beta		group	Activated	2.984	bias	5.96e-05	ATF3,CD83,HLA-A,IFI44,IFIT1B,IL1RN,IRF7,ISG15,OAS1,PRKCA,SLC16A6,USP18,XAF1	170 (15)
IL21		cytokine	Activated	4.583	bias	1.05e-06	CCRL2,CLIC5,CMPK2,EGR1,FGL2,GBP5,GBP6,IFIT1B,IFIT2,IFIT3,Igtp,IL2RB,IRF7,ISG15,MKI67,OAS2,PSMB9,PTPRC,TAP1,Tgtp1/Tgtp2,USP18	267 (20)				SOX4	2.588	transcription regulator	Activated	2.914	bias	6.04e-05	CHAC1,E130308A19Rik,EIF4E3,EVL,IGF2,Ly6a (includes others),LY6D,MGST2,PLEKHA1,PPIC,SERPINE2,SORT1,TEAD1,TES,TMEM98
IL5		cytokine	Activated	5.189	bias	1.21e-06	ALDOC,CCRL2,CD63,CD9,CSF2RB,CSF3R,CTSC,DENND11,EGR1,FGL2,GBP2,GBP4,GBP7,ICAM1,IL2RG,IRF7,LCP2,NDRG1,PDE4B,PIM1,PKM,PTPRC,RAP1GAP,RASGRP2,Scd2,SLC1A5,STK39,ZNF25	326 (20)				S100A4		other	Activated	2.412	bias	6.49e-05	EFNA1,PF4,PLAU,S100A8,S100A9,SAA1,VCAM1	208 (18)
CASR		G-protein coupled receptor	Activated	2.393	bias	1.4e-06	BMP7,CCND1,COL4A1,COL4A2,CYP2B6,EGR1,GABBR1,ISG15,LPL,NUPR1,PDLIM2,RNF144A,SERPINB6,SLC7A7,SRC,TLR2,TXNIP,UCP2	307 (23)				PGR		ligand-dependent nuclear receptor	Activated	2.351	bias	7.34e-05	AR,CCND1,CLDN7,EZR,GLS,GRB10,GRIA3,H19,IGFBP1,IRS2,ITGA6,LDLRAD4,NDRG1,PFN2,PLAU,PPM1H,PRRX1,RHOC,S100A8	251 (24)
IKBKG		kinase	Activated	3.385	bias	1.55e-06	ACTA1,CDH13,GBP2,HLA-A,ICAM1,IFIT1B,IRF7,ISG15,JUNB,LCN2,Mt1,Mt2,NID1,RGS16,Saa3,SERPINE2,Slfn2,TNFAIP2	291 (14)				CCNH		transcription regulator	Inhibited	-2.236	bias	7.54e-05	COMMD3-BMI1,MEIS2,MKX,Rfx5,UCP2
PDGF BB		complex	Activated	3.678	bias	1.92e-06	ACKR3,ADD3,ATF3,CCND1,EGR1,FGFR1,GBP2,GDF15,H19,HES1,IGF2,JUNB,LBP,MCM6,MGST2,Mt1,Mt2,NR4A1,NR4A2,PDGFRA,PIM1,PLCG2,RGS2,Scd2,SLC7A7,SPI1,SYK,TRIB3,UNC5B,VCAM1	322 (22)				ERK1/2		group	Activated	2.007	bias	7.62e-05	BHMT,CCND1,CCND2,CYP17A1,CYP46A1,EGR1,EZR,GRK5,H19,HLA-A,IRS2,JUNB,LEPR,PDGFRA,PLAU,RHOC,SOX9,SPP1,TYMP,VCAM1	185 (18)
MYOD1		transcription regulator	Activated	3.457	bias	2.36e-06	ACTA1,ADCY7,ASB2,ATP2A1,CKM,COL4A1,FNDC5,IFIT2,IGF2,IRX1,ITGA7,JUNB,MKI67,MYLPF,PPARGC1A,RAC2,SRC,STAT1,TEAD2,TGFBR3,TNNC2,TNNI2,TNNT3,TOP2A,UBA7	311 (18)				GDF2		growth factor	Activated	2.29	bias	7.72e-05	Cdkn1c,GADD45B,HTRA1,LYVE1,NGFR,NTF3,NTRK1,SERPINE2,SPP1,VCAM1	76 (8)
TCL1A		transcription regulator	Activated	2	bias	2.4e-06	C1QA,CD5L,CFP,CLEC6A,CSF3R,CTSC,GDF15,ITGB2,LCN2,Ly6a (includes others),LY9,MARCO,MPEG1,TNFAIP2	191 (7)				CREB1		transcription regulator	Activated	3.151	bias	8.7e-05	ATF3,BHLHE22,CCND1,CD9,CDH13,CPEB1,CYP46A1,EGR1,ESRRG,GADD45B,GLS,GRIA3,HLA-A,Ifi202b,IRF7,IRS2,JUNB,LCN2,LPL,MCM6,Meis1,MEST,NR4A1,NR4A2,PDGFRA,RFX4,RGS2,ROBO1,SERINC2,SLC19A1	200 (17)
ERBB3		kinase	Activated	2.809		2.49e-06	ACTA1,AXL,CCND1,CDKN2C,EGR1,EMP2,EZR,GAS6,GLS,IGF2,ITGB2,NDRG1,NID1,TNNT3,TOP2A,TSPAN3	341 (20)				EGFR		kinase	Activated	2.5	bias	8.91e-05	AR,BTC,CCND1,CDCP1,CDKN2A,CXCL14,EGR1,ERBB4,FKBP11,GPC1,HSPB1,IGF2,IGF2BP3,ITGA6,JUNB,LCN2,MATN2,PLAU,PROM1,PTGIS,SDF2L1,SERPINE2,SOX9,TXNIP	227 (20)
TP53		transcription regulator	Activated	2.366		2.87e-06	ABCB1,ACOT11,ADA,ADD3,AFP,ALDH18A1,ALDH1A2,AR,ATF3,BMF,BOK,CAMK2B,CCND1,CDKN2A,CHMP4C,CKM,COL4A1,COL4A2,CORO1A,CSF3R,DNAJA4,DOK1,EFNA1,EGR1,ELF4,ESRRG,EZR,FGFR1,FZD6,G0S2,GAS6,GAS7,GDF15,GLB1,GNA14,GPR157,GPX3,H19,HSPB1,ICAM1,IGF2,IGF2BP2,IKBIP,IRF7,IRF8,ISG15,JUNB,LDHB,LIMK1,Ly6a (includes others),MB,MCM6,ME2,MGST2,MKI67,MLH1,Mt2,MTMR11,Mx1,NCK2,NDRG1,NUPR1,OAS1,OAT,P2RY14,PAK1,PDE4B,PDGFRA,PEG3…	354 (22)				IFI16		transcription regulator	Activated	2.828	bias	9.78e-05	CCND1,CDKN2A,IL1RN,IL2RB,ISG15,LPL,OAS1,PIM1,VCAM1	225 (21)
IFNA4		cytokine	Activated	3.093	bias	3.31e-06	AP1S3,CCRL2,GBP2,GBP5,IFIH1,IFIT2,ISG15,Ly6a (includes others),USP18,ZBP1	230 (19)				POU5F1		transcription regulator	Activated	2.68	bias	9.96e-05	BMPER,CASP6,CCND1,CLDN7,CYP26A1,GBP4,H19,IRX3,LHX2,Meis1,Oasl2,PDGFRA,PEG3,PHC1,PROM1,SIRPA,SPP1,SRC,TEAD1,TEAD2,USP18	137 (8)
VDR		transcription regulator	Activated	2.314	bias	3.46e-06	BMP7,CCND1,COL4A1,COL4A2,CYP2B6,DOK1,EGR1,ICAM1,ISG15,LPL,NUPR1,PDLIM2,PLD1,RNF144A,SERPINB6,SLC51B,SLC7A7,SPP1,SRC,SULT2A1,TLR2,TMPRSS2,TXNIP,UCP2	357 (25)				IL5		cytokine	Activated	4.273	bias	0.000101	ASNS,CCND2,CCRL2,CD63,CD9,EGR1,GBP2,GBP4,GBP7,HLX,IRF7,LCP2,NDRG1,PIM1,Scd2,SDF2L1,SLC1A5,STK39,ZNF25	166 (16)
NFkB (complex)		complex	Activated	5.172	bias	3.62e-06	ABCB1,ACKR3,ANXA13,ATF3,BAG2,CCND1,CD83,CLCF1,CYP3A5,DTX3,EFNA1,EGR1,FOXF1,G0S2,GAS6,GBP2,GDF15,GRK5,HLA-A,HLA-DMB,HSPB1,ICAM1,IL15,IRF7,ISG15,JUNB,LCN2,NR1D1,NTF3,PLD1,PSMB9,RGS16,SAA1,Saa3,SELPLG,SH3RF1,SLC2A5,SPP1,STK10,TAP1,TLR2,TNFAIP2,TNFAIP8,TRIB3,VCAM1,Wfdc17	314 (15)				KMT2A		transcription regulator	Activated	3.124	bias	0.000102	ARSG,CDKN2A,EGR1,HOXA10,Meis1,MEIS2,MKX,PROM1,SLC16A6,ZIC1	63 (4)
CD38		enzyme	Activated	2.607	bias	3.67e-06	ALDOC,CSF2RB,DENND11,FGL2,GBP2,GBP4,GBP7,ICAM1,NDRG1,NT5E,PIM1,PKM,PPARGC1A,PPP3CC,RAP1GAP,RASGRP2,Scd2,STK39,VCAM1	246 (12)				SMAD1		transcription regulator	Activated	2.621	bias	0.000118	ALPL,CDKN2B,COL4A1,GADD45B,SOX9,SPP1,VCAM1	179 (13)
NFATC2		transcription regulator	Activated	3.374	bias	3.73e-06	ACPP,CD83,CMPK2,FGL2,GBP4,IFIT1B,IFIT2,IFIT3,IL15,IRF7,IRGM,ISG15,ISG20,NGFR,NR4A1,PLD1,PPARGC1A,PTPRS,RGS2,SRC,STAT1,TLR2	343 (19)				KLF4		transcription regulator	Activated	2.503	bias	0.000123	ALPL,BMPER,CCND1,CCND2,CDKN2B,CLDN7,CYP26A1,GBP4,HSPB1,IRX3,Oasl2,PDGFRA,PEG3,PROM1,TEAD1,TEAD2,USP18,VCAM1	202 (15)
AGT		growth factor	Activated	4.216	bias	3.82e-06	ACTA1,ADD3,ATF3,BOK,CCND1,CDH13,CDKN2A,COL4A1,CYBA,CYP17A1,CYP4A11,Cyp4a14,EGR1,GABBR1,GRK5,HES1,HSD3B2,HSPB1,ICAM1,IL15,ITGA7,ITGB3,LEPR,NDRG1,NR4A1,NR4A2,PPARGC1A,PPP1R3C,RGS2,SCNN1A,SOX4,SPP1,TGFBR2,TXNIP,UCP2,VCAM1,WNK4	364 (20)				LGR5		transmembrane receptor	Activated	2.236	bias	0.000127	LHPP,OAT,RDH16,SLC13A3,SLC1A2
Vegf		group	Activated	4.569	bias	3.85e-06	ABCB1,ACKR3,AQP4,ATF3,BAG2,BMP7,CA2,CDKN2A,CDKN2C,CLCF1,COL4A3,Ctla2a/Ctla2b,CYP4A11,EFNA1,EGR1,ELN,EMP2,GRB10,GRK5,HES1,ICAM1,IHH,ISG20,ITGA6,LCN2,LY75,MGST2,MKI67,Mt2,NR4A1,NR4A2,P2RY14,PDE7B,PLXNA2,RGS2,STK10,TGFBR2,TRIB2,VCAM1	358 (23)				Vegf		group	Activated	3.365	bias	0.000148	AQP4,ASNS,ATF3,CA2,CDKN2A,CLCF1,COL4A3,EFNA1,EGR1,ELN,EMP2,GRB10,GRK5,IHH,ISG20,ITGA6,LCN2,LYVE1,MGST2,NR4A1,NR4A2,P2RY14,PDE7B,PLAU,RGS2,STK10,VCAM1	221 (20)
CEBPA		transcription regulator	Activated	2.72	bias	3.96e-06	ABCB1,ADCY7,APOA4,BHMT,CA2,CCND1,CSF3R,CYP2B6,CYP3A5,G0S2,Hamp/Hamp2,ICAM1,IRS2,ISG15,JUNB,LCN2,LEPR,LPL,Ly6a (includes others),NR4A2,OAS2,Orm1 (includes others),PPARGC1A,PPL,PPP1R14A,PPP1R3C,PTPRC,RGS2,SAA1,Saa3,SERPINB1,SPI1,SPP1,SULT2A1,Sult2a2,TUBB2A	280 (23)				IKBKG		kinase	Activated	3.354	bias	0.000152	CDH13,GBP2,HLA-A,IFIT1B,IL1RN,IRF7,ISG15,JUNB,LCN2,NID1,RGS16,SERPINE2	173 (14)
IL12 (complex)		complex	Activated	2.684	bias	4.04e-06	CD63,Ctla2a/Ctla2b,ICAM1,Ifi202b,IFIH1,IFIT1B,IFIT2,IL15,IRF8,ISG15,ISG20,ITGA6,ITGB2,Ly6a (includes others),MARCO,Mx1,PIM1,SELPLG,TGFBR2,Tgtp1/Tgtp2,TLR2,Trim30a/Trim30d	259 (16)				LEP		growth factor	Activated	3.364	bias	0.000171	ABCG5,APOA4,AR,CASP6,CCND1,CD63,COL4A1,CYP17A1,Cyp2a12/Cyp2a22,CYP2C18,CYP3A5,Cyp4a14,EGR1,FGF21,FGFR1,IL1RN,IRS2,JUNB,LEPR,LPL,PLIN2,Scd2,SPP1,UCP2,VCAM1	180 (19)
SOX9	1.659	transcription regulator	Activated	2.781	bias	4.27e-06	AR,COMMD3-BMI1,CREB3L2,DCT,GAS7,H19,IHH,LBP,PRKCA,PTGDS,SMPD3,SOX9	287 (17)				Alpha catenin		group	Inhibited	-3.261	bias	0.000192	ELN,IGF2,IGFBP1,PDGFRA,PLAU,RHOC,S100A8,S100A9,SAA1,STEAP2,VCAM1	160 (13)
TWIST1		transcription regulator	Activated	2.021	bias	5.29e-06	AR,AXL,CBX2,CDKN2A,FMOD,GPC1,HEG1,ITGA8,ITGB3,MFGE8,MME,NT5E,PDGFRA,PROM1,PXDN,RHOC,SPP1,TGFBR2,UNC5B					TP53		transcription regulator	Activated	2.297		0.0002	ABCA2,ACOT11,ALDH1A2,AR,ASNS,ATF3,BMF,CAMK2B,CASP6,CCND1,CCND2,CDKN2A,COL4A1,COL4A2,DNAJA4,DSN1,EFNA1,EGR1,ESRRG,EZR,FGFR1,GADD45B,GAS7,GDF15,GLB1,GNA14,GPX3,H19,HSPB1,IGF2,IGF2BP2,IL1RN,IRF7,ISG15,JUNB,LDHB,Ly6a (includes others),MCM6,ME2,MGST2,NCK2,NDRG1,NUPR1,OAS1,OAT,P2RY14,PAK1,PDGFRA,PEG3,PIM1,PLAU,PPIC,PRKCA,PROM1,PTGDS,PTPRM,RGS16,ROBO1,SEPTIN5,SERPINE2,SLC19A1,SLC25A4,SPP1,SRC,SULF2,TNFA…	264 (24)
EP300		transcription regulator	Activated	3.478	bias	5.53e-06	ACTA1,AP3M2,AR,ARHGAP24,BMF,CA2,CAMK2B,CCND1,CDKN2A,CDKN2B,CKM,EGR1,EVL,FMNL2,GIMAP1-GIMAP5,IFIT1B,ITGA6,ITGB2,MKI67,MME,NDRG1,NR4A1,PPARGC1A,RASA3,RNASEL,RTP4,SCN4B,SLC43A1,SMPD3,TGFBR2,TLR2,TMPRSS2,TUBA8,TXNIP,USP18	337 (25)				SMAD3		transcription regulator	Activated	2.986	bias	0.000206	ADORA1,APOA4,CCND1,CCND2,CDKN2A,CDKN2B,CYP21A2,EGR1,ELN,FNDC5,GADD45B,GLS,JUNB,Ly6a (includes others),Orm1 (includes others),SLC25A4,SPP1	260 (24)
HTT		transcription regulator	Activated	2.525		5.53e-06	ACTA1,ALDOC,ATF3,ATP8A1,CALML4,CAMK2B,CCND1,CD9,CKM,COL4A1,COL4A2,COX6B2,DLL1,EGR1,EVL,FGFR1,GAS7,GPC1,GPX3,GRK5,Hamp/Hamp2,HAP1,IGF2,IL15,JUNB,LDHB,MPEG1,Mt1,NGFR,NR4A1,NR4A2,NTRK1,NTRK2,PDE4B,PPARGC1A,PROM1,PSMB9,RAP1GAP,RASGRP2,RGS16,Scd2,SCN4B,SIRPA,SPP1,ST3GAL2,TNNI2,TNNT3,Tpm2,VCAM1	356 (24)				GLI1		transcription regulator	Activated	3.372	bias	0.000209	CCND1,CCND2,COMMD3-BMI1,EZR,GPC3,GRIA3,IGF2,MEST,NPDC1,PDGFRA,PDZRN3,PIM1,S100A9,SOX9,SPP1	176 (15)
CEBPB		transcription regulator	Activated	3.326	bias	7.33e-06	ABCB1,ALDH1A2,APCS,BHMT,CCND1,CDKN2B,CSF3R,CTSC,CYP17A1,Cyp2d9 (includes others),DYNLT1,ENTPD2,FBLN1,Hamp/Hamp2,HLA-A,HSD3B2,ICAM1,IRS2,LBP,LCN2,LCP2,LEPR,NUPR1,Orm1 (includes others),PDGFRA,PPARGC1A,PPP1R14A,RAC2,SAA1,Saa3,SIM2,SPP1,SULT2A1,TRIB3	315 (22)				BMP2		growth factor	Activated	2.108	bias	0.000209	ALDH1A2,ALPL,BTC,CCND1,CYP17A1,ESRRG,EVC2,FGF21,FGFR1,GADD45B,IHH,JUNB,SOX9,SPP1,ZBTB16	198 (21)
SOX1		transcription regulator	Inhibited	-3.317	bias	7.83e-06	BMPER,CYP26A1,FOXF1,GBP4,HES1,IRX3,Oasl2,PDGFRA,PEG3,TEAD1,TEAD2,USP18					Ige		complex	Activated	2.574	bias	0.000218	CCND2,CLCF1,EGR1,GADD45B,GDF15,GIMAP1-GIMAP5,H2-Q8,JUNB,LCP2,MAPKAPK3,MGST2,NGFR,PPP3CC,PRKCA,PTPRS,RGS16,SERPINB1,SPP1,TLR7,VCAM1	211 (19)
SPI1	1.542	transcription regulator	Activated	3.333	bias	8.15e-06	CCND1,Cdkn1c,CMPK2,CSF2RB,CSF3R,HES1,IFI44,IFIT1B,IFIT2,IFIT3,IRF7,ISG15,ISG20,ITGB2,LMO2,LY6E,MME,PARP12,PSMB9,PTPRC,SP110,SPI1,SPP1,TLR2,USP18	323 (19)				NR5A2		ligand-dependent nuclear receptor	Activated	2.349	bias	0.000236	ABCG5,CCND1,CYP17A1,CYP21A2,HSD3B2,IGFBP1,IL1RN,JUNB,PTGDS,SAA1	209 (19)
CSF1		cytokine	Activated	3.748	bias	8.64e-06	CCND1,CD163,CPM,CYP17A1,EGR1,FCGR3A/FCGR3B,FERMT3,GDF15,GLS,IRF7,IRF8,ITGB3,JUNB,MARCO,PKM,PTPRC,SIGLEC1,SLC1A5,SPI1,STAT1,TLR2,VCAM1	324 (19)				RUNX2		transcription regulator	Activated	2.585	bias	0.000239	ALPL,CCND1,CDHR5,GADD45B,HTRA1,IHH,OLIG1,PLAU,PTGDS,SOX9,SPP1	207 (19)
HIF1A		transcription regulator	Activated	3.844	bias	9.87e-06	ABCB1,AFP,ALDOC,AQP4,AXL,CCND1,CDCP1,Cdkn1c,CDKN2A,CORO1A,CYP46A1,ERBB4,ESRRG,Hamp/Hamp2,HSPB1,IGF2,IL15,IRS2,ITGB2,ITGB3,KIAA1217,MB,NDRG1,NR4A1,NT5E,NTRK2,PKM,PRKCA,PROM1,RAB11FIP4,SOX9,TLR2,TNFAIP2,VCAM1	347 (21)				IL6		cytokine	Activated	3.419	bias	0.000239	AQP4,ATF3,BTC,CCND1,CD83,CDKN2A,CDKN2B,CIB2,CYP2B6,CYP3A5,EGR1,GADD45B,GBP2,H2-Q8,HLA-A,Ifi202b,IFIT1B,IGF2,IGFBP1,IL1RN,JUNB,LBP,LCN2,LPL,Orm1 (includes others),PIM1,PLAU,PROM1,RAB27A,S100A9,SAA1,SPP1,SRC,TLR7,TLR8,VCAM1	179 (17)
IKBKB		kinase	Activated	4.36	bias	1.04e-05	AFP,ATF3,CCND1,CDH13,CYBA,EGR1,GBP2,GRK5,HLA-A,ICAM1,IFIT1B,ISG15,ITGB3,JUNB,LCN2,Mt1,Mt2,NID1,RGS16,Saa3,SERPINE2,Slfn2,TGFBR2,TNFAIP2,Tpm2,VCAM1	269 (14)				SPDEF		transcription regulator	Inhibited	-2.449	bias	0.000249	CLDN7,COL4A1,COL4A2,COL4A5,FGFR1,ITGA6,PLAU,PRKCA	104 (7)
IL1RN	1.654	cytokine	Inhibited	-3.33	bias	1.13e-05	ATF3,CHAC1,CYP3A5,ICAM1,IFI44,IFIH1,IFIT3,IRF7,ISG20,NTRK1,OAS1,OAS2,RTP4,SPP1,THEMIS2,USP18	294 (20)				JAK1		kinase	Activated	2.425	bias	0.000275	BMF,HLA-A,IRF7,JUNB,Oasl2,Orm1 (includes others),SAA1,USP18	185 (15)
ERK1/2		group	Activated	2.453	bias	1.14e-05	BHMT,CCND1,CDC42EP5,CYP17A1,CYP46A1,EGR1,EZR,GRK5,H19,HLA-A,ICAM1,IRS2,ITGB3,JUNB,LEPR,PDGFRA,PKM,PSMB9,RHOC,Saa3,SLC12A6,SOX9,SPP1,SPRY4,TAP1,TYMP,VCAM1	312 (21)				IKBKB		kinase	Activated	3.391	bias	0.000285	ATF3,CCND1,CDH13,EGR1,GBP2,GRK5,HLA-A,IFIT1B,IL1RN,ISG15,JUNB,LCN2,NID1,PLAU,RGS16,SERPINE2,Tpm2,VCAM1	180 (16)
OSM		cytokine	Activated	3.783	bias	1.2e-05	ABCC4,AFP,ATF3,BTC,CADM4,CCND1,CKM,CPM,CYP3A5,EGR1,GAS7,GBP2,GCA,Hamp/Hamp2,HLA-A,ICAM1,IL15,IRF7,ISG20,JUNB,LBP,LCN2,MAOA,Mt2,OAS1,PDZK1IP1,PPP3CC,PSMB9,SAA1,SERPINB1,SLC7A8,SPP1,STAT1,TAP1,TLR2,TNFAIP2,TOP2A,TULP3,TYMP,VCAM1	295 (20)				IL1A		cytokine	Activated	2.539	bias	0.000315	ATF3,CA2,CD83,CYP17A1,CYP2B6,CYP3A5,FGFR1,IL1RN,JUNB,LCN2,PLAU,S100A8,S100A9,SAA1,SPP1,VCAM1	204 (18)
ERG		transcription regulator	Activated	3.043	bias	1.37e-05	ABCC4,AR,ARHGAP24,ARHGEF6,CUX2,DOCK10,DOCK2,FMNL2,ICAM1,ITGA6,NDRG1,NR4A2,PHACTR2,PIM1,RCAN2,SOX4,SOX9,SPP1,TGFBR2,TMPRSS2,ZBTB16	292 (12)				SASH1		other	Activated	2.828	bias	0.000336	ACPP,CCND2,IFIT1B,IRF7,ISG15,ISG20,MARCO,Trim12a
ABCB6		transporter	Activated	2.932		1.43e-05	Cyp2a12/Cyp2a22,CYP2B6,Cyp2c40 (includes others),Cyp2c54 (includes others),Cyp2d9 (includes others),Cyp3a25 (includes others),CYP3A5,CYP4A11,Cyp4f16/Cyp4f37					IL1RN	1.94	cytokine	Inhibited	-2.533	bias	0.000337	ATF3,CHAC1,CYP3A5,IFI44,IRF7,ISG20,NTRK1,OAS1,S100A9,SPP1,USP18	180 (17)
CG		complex	Activated	4.115	bias	1.43e-05	ABCB1,ACPP,AR,BHMT,BTC,CYP17A1,CYP26A1,EGR1,FAM110C,FGL2,G0S2,GBP6,GPC1,HLA-A,HSD3B2,ICAM1,IFIT3,IRS2,ITGB3,JUNB,LEPR,NR4A1,NUCB2,Oasl2,PPP1R14A,RGS2,Saa3,SPP1,SULT2A1,TGFBR3	322 (17)				Pkc(s)		group	Activated	2.309	bias	0.000345	AQP4,ATF3,EGR1,GADD45B,IGF2,JUNB,NR1D1,NR4A1,NR4A2,PRKCA,RGS2,S100A8,SLC1A2,SPP1,VCAM1	203 (21)
TNK1		kinase	Activated	2.449	bias	1.58e-05	IFIH1,IFIT1B,IFIT2,IRF7,ISG20,OAS2	116 (9)				NRG1		growth factor	Activated	2.84	bias	0.000383	AR,CCND1,CCND2,COL4A3,EGR1,EMP2,GLS,GPX3,GUCY2C,IGF2,JUNB,NDRG1,NR4A1,NTRK1,PLAU,SOX4,TSPAN3	240 (21)
SAMSN1		other	Activated	3.606	bias	1.61e-05	CMPK2,FGL2,IFIT1B,IFIT2,IFIT3,IL15,IRF7,IRGM,ISG15,ISG20,MARCO,STAT1,Trim12a	192 (7)				CNOT3		other	Inhibited	-2	bias	0.000391	IGFBP1,LEPR,PDK4,UCP2
IFIH1	1.521	enzyme	Activated	2.75	bias	1.74e-05	EGR1,IRF7,ISG15,Ly6a (includes others),Mx1,OAS1,OAS2,SIGLEC1,USP18	115 (11)				TCR		complex	Activated	2.472	bias	0.000395	APOA4,CCND1,COMMD3-BMI1,EGR1,GADD45B,GBP4,GRIA3,IFI44,IRF7,ISG15,ISG20,JUNB,LCP2,LDHB,NR4A1,OAS1,PIM1,SLC1A5,SPP1,TLR7,ZAP70	201 (21)
Irgm1		other	Inhibited	-3	bias	2.11e-05	Ifi27l2a/Ifi27l2b,IFIT1B,IFIT2,IFIT3,IRF7,MKI67,NUPR1,OAS2,USP18	219 (10)				cytokine		group	Activated	2.333	bias	0.000421	AQP4,BMF,CCND1,EFNA1,EGR1,IGFBP1,ITGA6,Ly6a (includes others),PLAU,SAA1,TYMP,VCAM1	178 (18)
CXCL12		cytokine	Activated	3.752	bias	2.5e-05	AFP,AIF1,AXL,CA2,CCND1,CD9,CYP2C18,CYP3A5,DMPK,EGR1,ICAM1,ITGB3,JUNB,LCP2,Ly6a (includes others),NR4A1,RHOC,SELPLG,SORBS3,ZBTB16	301 (22)				CXCL12		cytokine	Activated	2.9	bias	0.000433	CA2,CCND1,CD9,CYP2C18,CYP3A5,EGR1,JUNB,LCP2,Ly6a (includes others),NR4A1,PLAU,RHOC,SORBS3,ZBTB16	198 (24)
DOCK8		other	Activated	3.317	bias	2.51e-05	CMPK2,FGL2,IFIT1B,IFIT2,IFIT3,IL15,IRF7,IRGM,ISG15,ISG20,STAT1					IRF3		transcription regulator	Activated	3.25	bias	0.000455	CCRL2,DDX60,Ifi27l2a/Ifi27l2b,IFI44,IFIT1B,IRF7,ISG15,ISG20,JUNB,LCN2,OAS1,Oasl2,Trim30a/Trim30d,USP18	136 (13)
PARP1		enzyme	Activated	2.958	bias	2.57e-05	CCND1,GBP2,GBP4,GBP6,GBP7,GDF15,H19,HES1,ICAM1,Igtp,IRGM,STAT1,Tgtp1/Tgtp2,TMPRSS2,VCAM1	318 (17)				STAT4		transcription regulator	Activated	3.833	bias	0.000459	Ifi202b,IFIT1B,ISG15,ISG20,ITGA7,ITIH5,LTBP3,MLLT3,NDRG1,NXN,PFN2,RGS16,RRAGD,SERPINB1,Trim30a/Trim30d	170 (15)
HGF		growth factor	Activated	3.298	bias	3.72e-05	ACKR3,AFP,ATF3,BAG2,CCND1,CDKN2A,CDKN2B,CDKN2C,CLCF1,COL4A1,CYP17A1,CYP2B6,EGR1,EMP2,GRB10,GRK5,HES1,ICAM1,IRF8,ISG15,ISG20,ITGA6,LCN2,LY75,MKI67,NR4A1,NR4A2,PIM1,PLXNA2,RGS2,SPP1,STK10,TGFBR2,TNFAIP2,TRIB2,VCAM1	337 (18)				STK3		kinase	Inhibited	-2		0.000511	CCND1,GPC3,SOX4,SPP1	176 (16)
Pdgf (complex)		complex	Activated	2.082	bias	4.02e-05	CCND1,CDKN2B,COL4A1,CYBA,EGR1,ICAM1,IRS2,ITGB3,JUNB,MCM6,NR4A2,NTF3,VCAM1	267 (20)				VEGFA		growth factor	Activated	3.003	bias	0.000523	CCND1,CCRL2,CD83,CDKN2A,CLDN7,EGR1,FGFR1,GRB10,HLX,JUNB,ME2,NR4A1,NR4A2,PIM1,PLAU,PRKCA,UNC5B,VCAM1	187 (20)
NSD2		enzyme	Activated	2.449	bias	4.11e-05	CA2,IFIT1B,IGF2BP2,IRF7,Mx1,OAS1,PRKCA,STAT1					IGF1R		transmembrane receptor	Activated	3.383	bias	0.000557	AQP4,COL4A1,COL4A2,EGR1,GRB10,H19,HTRA1,IGF2,IRS2,LPL,Meg3,NR4A1,PDLIM2,PLAU,PROM1,Scd2,Tpm2	224 (21)
PIK3R1		kinase	Activated	2.72	bias	4.3e-05	AR,CCND1,ICAM1,IRF7,ISG15,MKI67,PDGFRA,PIK3CD,PKM,TRIB3,TXNIP,VCAM1	310 (21)				MED1		transcription regulator	Activated	3.105	bias	0.000561	CCND1,CCND2,CYP17A1,CYP2B6,CYP3A5,Cyp4a14,IGFBP1,IL2RB,LY6D,PDK4,PIM1,SULT2A1	187 (15)
STAT4		transcription regulator	Activated	4.536	bias	4.43e-05	ALDOC,Ctla2a/Ctla2b,FYB1,Ifi202b,IFIH1,IFIT1B,IFIT2,ISG15,ISG20,ITGA7,MLLT3,Mt1,Mx1,NDRG1,NXN,RGS16,RRAGD,SELPLG,SERPINB1,STAT1,Trim30a/Trim30d	295 (18)				CD38		enzyme	Activated	2.939	bias	0.000628	ASNS,CCND2,GBP2,GBP4,GBP7,NDRG1,PIM1,PPP3CC,Scd2,SDF2L1,STK39,VCAM1	181 (13)
CYB5R4		enzyme	Inhibited	-2.418	bias	4.52e-05	ATF3,LPL,Mt1,Mt2,PPARGC1A,Scd2	177 (7)				ERG		transcription regulator	Activated	2.781	bias	0.000639	AR,ARHGAP24,DIP2A,ITGA6,NDRG1,NR4A2,PIM1,PLAU,PTPN4,SOX4,SOX9,SPP1,WNT2,ZBTB16	200 (16)
CREB3L3		transcription regulator	Activated	2.395	bias	4.52e-05	APCS,APOA4,APOC2,Cyp2b13/Cyp2b9,CYP2B6,Hamp/Hamp2					EGLN		group	Inhibited	-3.399	bias	0.000663	A1BG,APOA4,EFNA1,IGFBP1,LCN2,Orm1 (includes others),PPP1R3G,RAB11FIP5,RRAGD,S100A9,SAA1,SOX9
IFNL3		cytokine	Activated	2.401	bias	4.9e-05	IL15,ISG20,Mx1,RNASEL,STAT1,TLR2,USP18	212 (15)				IFIH1	1.264	enzyme	Activated	2.377	bias	0.00067	EGR1,IRF7,ISG15,Ly6a (includes others),OAS1,USP18	100 (12)
SAV1		other	Inhibited	-2.4	bias	6.15e-05	CCND1,CDKN2A,COL4A1,GPC3,SOX4,SPP1	20 (3)				POMC		other	Activated	2.139	bias	0.000724	CYP17A1,CYP21A2,H19,IGF2,JUNB,NR4A1,NR4A2,SULT2A1,VCAM1	142 (15)
IFI16		transcription regulator	Activated	3.091	bias	6.33e-05	CCND1,CDKN2A,CSF3R,ICAM1,IL2RB,ISG15,LPL,Mx1,OAS1,PIM1,VCAM1	332 (23)				JUN		transcription regulator	Activated	2.968	bias	0.000737	AR,ASNS,ATF3,CCND1,CCND2,CDKN2A,CYP17A1,EZR,FBLN5,GSTA5,IGFBP1,IRS2,JUNB,LBP,NR4A1,PLAU,PTGDS,SAA1,SLC19A1,SPP1,SULF2,SULT2A1,VCAM1,ZNF385A	238 (21)
TREM1		transmembrane receptor	Activated	2.025	bias	6.95e-05	ACKR3,ATF3,CCRL2,CD83,CDKN2B,EGR1,HES1,HTRA4,IFIT2,ISG15,LPL,LY9,NR4A2,NT5E,PLD1,RGS16,SPP1,TIFA,TLR2	312 (22)				ZMPSTE24		peptidase	Inhibited	-2.335	bias	0.000757	ATF3,CXCL14,GADD45B,IGFBP1,RGS16,SIRPA	182 (13)
JAK2		kinase	Activated	2.96	bias	7.34e-05	BMP7,CCND1,CDKN2A,EGR1,GBP2,ICAM1,LCN2,LMO2,LY6E,NR4A1,PSMB9,Rps4l,Saa3,STAT1,TAP1,TRIB2	287 (20)				Pka		complex	Activated	2.574	bias	0.000805	EGR1,FGF21,JUNB,MEST,NR4A1,NR4A2,PLD1,RGS2,SLC1A2,SOX9,XAF1	158 (20)
NRG1		growth factor	Activated	3.601	bias	8.12e-05	AR,AXL,CCND1,CDKN2C,COL4A3,EGR1,EMP2,GAS6,GLS,GPX3,GUCY2C,HES1,IGF2,ITGB2,ITGB3,JUNB,NDRG1,NR4A1,NTRK1,SH2D4A,SOX4,TOP2A,TSPAN3	340 (21)				APEX1		enzyme	Activated	2	bias	0.000865	EGR1,HTRA1,JUNB,NR4A1,RGS2	103 (7)
SOCS3		phosphatase	Inhibited	-2.762	bias	9.39e-05	ACTA1,ATF3,CCND1,EGR1,ICAM1,IFIT2,IRS2,ISG20,OAS1,OAS2,PPARGC1A,TFF3	322 (22)
Gm15807/Hmgn5		other	Activated	2.449	bias	9.65e-05	ACTA1,ATP2A1,CSF2RB,TNNC2,TNNI2,TNNT3,Tpm2
KITLG		growth factor	Activated	2.432	bias	0.000101	AIF1,AXL,CA2,CDC42EP5,CDKN2B,CSF3R,EGR1,FGFR1,GAS6,HCK,Ifi27l2a/Ifi27l2b,ITGB3,LAPTM5,LY6E,MARCO,MME,PIM1,PKM,PRKCA,SYK,TXNIP,UCP2	250 (12)
IFNE		cytokine	Activated	2.828	bias	0.000104	CD83,IFIH1,IFIT2,ISG15,ISG20,STAT1,USP18,ZBP1	148 (10)
GATA1		transcription regulator	Activated	3.02	bias	0.000111	ABCC4,CA2,CCND1,CDKN2A,CDKN2C,EGR1,FYB1,IRF8,ITGA6,ITGB3,JAZF1,JUNB,LEPR,LMO2,Meis1,MGST2,NR4A2,PHC1,PIM1,PLXNA2,SRC,ST3GAL6,TFF3,TOP2A	258 (11)
Ige		complex	Activated	2.923	bias	0.000116	ASB2,CDC42EP5,CLCF1,CMPK2,EGR1,GDF15,GIMAP1-GIMAP5,H2-Q8,ICAM1,IL15,JUNB,LCP2,MAPKAPK3,MGST2,NGFR,PIK3CD,PPP3CC,PRKCA,PTPRS,RALGDS,RGS16,SERPINB1,SERPINB6,SPP1,TLR2,VCAM1	369 (23)
EPAS1		transcription regulator	Activated	3.273	bias	0.000116	ALDOC,AXL,C1QA,CCND1,CDC42EP5,CDCP1,CKM,CORO1A,GAL3ST1,GLB1,GLS,IRS2,ITGB3,LPL,MB,NDRG1,NT5E,PRKCA,SOX9,TGFBR2	294 (16)
GMNN		transcription regulator	Inhibited	-3.317	bias	0.000143	BMPER,CYP26A1,FOXF1,GBP4,IRX3,Oasl2,PDGFRA,PEG3,TEAD1,TEAD2,USP18
STK3		kinase	Inhibited	-2.236		0.000162	CCND1,GPC3,SOX4,SPP1,WWTR1	258 (11)
MAP2K1		kinase	Activated	2.228	bias	0.000164	ABCB1,ATF3,CCND1,CDKN2A,CDKN2B,CKM,CYP17A1,CYP46A1,ITGB3,PDGFRA,PIM1,RAP1GAP,RAP2B,RRAGD,SERPINE2,SIRPA,SOX9,UNC5B	317 (22)
LEP		growth factor	Activated	4.205	bias	0.000165	ABCG5,APOA4,AR,BOK,CCND1,CD63,COL4A1,CYBA,CYP17A1,Cyp2a12/Cyp2a22,CYP2C18,Cyp2c54 (includes others),Cyp2d9 (includes others),CYP3A5,CYP4A11,Cyp4a14,EGR1,FGFR1,HES1,ICAM1,IRS2,JUNB,LEPR,LPL,PPARGC1A,Saa3,Scd2,SPI1,SPP1,Tgtp1/Tgtp2,UCP2,VCAM1	250 (20)
SMAD1		transcription regulator	Activated	2.8	bias	0.000171	ALPL,CDKN2B,COL4A1,Hamp/Hamp2,ICAM1,SOX9,SPP1,VCAM1	245 (12)
Hbb-b2		other	Activated	2.611	bias	0.000171	C1QA,CYBA,Hamp/Hamp2,IL2RB,IL2RG,LY86,SPI1,TLR2
NGLY1		enzyme	Inhibited	-2.57		0.000176	Ifi27l2a/Ifi27l2b,IFI44,IFIT1B,IFIT2,IFIT3,OAS1,USP18
VEGFA		growth factor	Activated	3.698	bias	0.000176	CCND1,CCRL2,CD83,CDKN2A,CLDN7,DLL1,EGR1,FGFR1,GRB10,HES1,ICAM1,INPP5D,ITGB3,JUNB,ME2,MKI67,NR4A1,NR4A2,PIM1,PPARGC1A,PRKCA,SLC12A6,UNC5B,VCAM1	316 (22)
WNT1		cytokine	Activated	2.172	bias	0.000199	CCND1,Cdkn1c,CDKN2A,DLL1,EGR1,HES1,IGF2,JUNB,LY6E,Meis1,MRAS,SERPINE2,SPP1,ZIC1	328 (20)
Brd4		kinase	Activated	2.828	bias	0.0002	APCS,COL4A1,COL4A2,COL4A3,COL4A5,P2RY4,SPON2,WFDC2
NFYA		transcription regulator	Activated	2.333	bias	0.000219	ABCB1,COMMD3-BMI1,EGR1,ICAM1,JUNB,MLH1,PKM,Scd2,TGFBR2,TOP2A,TXNIP	179 (7)
MST1		growth factor	Inhibited	-2.449	bias	0.000225	CCND1,GPC3,IL15,IRF8,SOX4,SPP1	217 (16)
TLR7	1.416	transmembrane receptor	Activated	3.673	bias	0.000232	Apol9a/Apol9b,ATF3,CCND1,CD83,ICAM1,IFI44,IFIT1B,IFIT3,INPP5D,IRF7,ISG15,ISG20,JUNB,Ms4a6c,Mx1,OAS2,SPRY4,STAT1,ZAP70	217 (19)
miR-34a-5p (and other miRNAs w/seed GGCAGUG)		mature microRNA	Inhibited	-3.681	bias	0.000234	ATF3,AXL,CCND1,DENND1C,DLL1,FAM110C,ICAM1,IKBIP,ITGB3,PPM1H,SAMD9L,SELPLG,SLC22A17,TRAM2	186 (7)
Immunoglobulin		complex	Inhibited	-3.208		0.00024	AIF1,CD83,CFP,COX6B2,CSF2RB,EGR1,FCGR3A/FCGR3B,GAS7,HCK,ICAM1,IFIT1B,IFIT2,IFIT3,IL2RB,IL2RG,IRF7,LCN2,LRRC32,Ly6a (includes others),MKI67,Mx1,NR4A1,NT5E,OAS2,PPARGC1A,RGS16,RGS2,SIRPA,SMOX,SPI1,SPP1,TGFBR3,TLR2,TYMP,VCAM1,ZBTB16	311 (21)
ETS1		transcription regulator	Activated	2.925	bias	0.000261	ABCB1,APOC2,CCND1,CDKN2A,EGR1,ICAM1,IGF2BP3,IL2RB,ITGB2,ITGB3,JUNB,LAIR1,NQO1,SERPINB6,SPI1,SPP1,TGFBR2,WAS,ZAP70	323 (19)
PA2G4		transcription regulator	Inhibited	-2	bias	0.000262	AR,GDF15,SLC43A1,TMPRSS2
PPARG		ligand-dependent nuclear receptor	Activated	3.039	bias	0.000299	ALDH1A2,CA2,CCND1,Cdkn1c,CDKN2C,CORIN,CYBA,CYP26A1,CYP4A11,Cyp4a14,ELOVL3,GDF15,HES1,ICAM1,IHH,IRS2,LPL,MKI67,MOGAT1,NDRG1,NR1D1,NR4A1,PPARGC1A,PPIC,Raet1c,SAA1,SMO,SPP1,TGFBR2,Tpm2,TRIB3,UCP2,VCAM1	351 (26)
SOX4	2.188	transcription regulator	Activated	2.128	bias	0.000313	CHAC1,EFNA5,EIF4E3,EVL,IGF2,Ly6a (includes others),MGST2,Mt1,PPIC,PXYLP1,RNF144A,SERPINE2,SPI1,TEAD1,TES,THSD1,TMEM98
LDL		complex	Activated	3.358	bias	0.00032	APOBEC3B,ATF3,AXL,CAMK2B,CCND1,CDKN2A,EGR1,G0S2,GAS6,ICAM1,IFIT2,IRF7,ITGB3,MKI67,MLH1,NR4A1,NR4A2,SIGLEC1,TGFBR2,TGFBR3,VCAM1	223 (17)
GDF2		growth factor	Activated	3.221	bias	0.000326	Cdkn1c,FMOD,Hamp/Hamp2,HTRA1,ICAM1,NGFR,NTF3,NTRK1,SERPINE2,SPP1,VCAM1	101 (7)
EGR1	2.013	transcription regulator	Activated	2.798	bias	0.000334	ABCB1,AR,ATF3,CCND1,Cdkn1c,CYP17A1,EGR1,GDF15,ICAM1,IGF2,JUNB,NDRG1,NR4A1,PDGFC,SPP1,TGFBR2,VCAM1	353 (24)
IFN type 1		group	Activated	2.75	bias	0.000359	DHX58,IFIH1,IFIT1B,IFIT2,ISG15,Mx1,STAT1,UBA7	195 (16)
SMARCB1		transcription regulator	Activated	2.298	bias	0.00036	ABCB1,ADD3,CCND1,CDKN2A,CDKN2C,Cyp2c54 (includes others),Cyp2d9 (includes others),Cyp3a25 (includes others),CYP4A11,Cyp4a14,Defb1,HES1,LBP,OAS1,PPP1R3C,RAB36	112 (7)
PRKCA	1.8	kinase	Activated	2.571	bias	0.000372	ACTA1,CCND1,EGR1,GDF15,HES1,ICAM1,IFIT3,IGF2BP3,LPL,MYLPF,NQO1,PLD1,VCAM1	297 (22)
MAPK14		kinase	Activated	2.825	bias	0.000378	ACTA1,CCND1,CD83,CDKN2A,CKM,Defb1,DLL1,EFNA1,ICAM1,IGF2,JUNB,NGFR,PPARGC1A,Slfn2,TOP2A,Tpm2,VCAM1	298 (22)
PGR		ligand-dependent nuclear receptor	Activated	3.121	bias	0.000398	AR,CCND1,CLDN7,CREB3L2,CTDSPL,ENC1,EZR,GAS6,GLS,GRB10,GRIA3,H19,HES1,ICAM1,IRS2,ITGA6,NDRG1,PPM1H,PRRX1,RASGRP2,RHOC,STAT1	295 (19)
CD40LG		cytokine	Activated	3.487	bias	0.000399	ATF3,AXL,CA2,CD63,CD83,CFP,CTSC,EGR1,G0S2,HDDC2,ICAM1,IFI44,IFIT2,IFIT3,IL15,IL2RB,ISG15,JUNB,PIM1,PSMB9,RGS2,SELPLG,STAT1,TAP1,TNFAIP2,TYMP,VCAM1,ZAP70	355 (22)
FOXL2		transcription regulator	Activated	2.2	bias	0.000408	ATF3,CDKN2A,CPM,CYP17A1,ICAM1,PPARGC1A,RGS2,SOX4,SOX9
GLI1		transcription regulator	Activated	3.342	bias	0.000409	CCND1,CEP70,CMPK2,COMMD3-BMI1,EZR,FUCA2,GPC3,GRIA3,IGF2,MEST,MLH1,NPDC1,PDGFRA,PDZRN3,PIM1,RNASEL,SOX9,SPP1
SPARC		other	Inhibited	-2.891		0.000425	ABCC4,DAB1,HES1,LOXL4,MCM6,MID2,NDRG1,NIPAL1,SERPINA7,SOX9,UBE2U,WNK4
NR1I3		ligand-dependent nuclear receptor	Activated	3.348	bias	0.000425	ABCB1,ABCC4,APCS,Cyp2b13/Cyp2b9,CYP2B6,CYP3A5,ICAM1,Mt1,Sult1a1,SULT2A1,TMPRSS2,TNFAIP2	170 (10)
Rock		group	Activated	2.425	bias	0.000469	ACTA1,CCND1,ICAM1,MYLPF,NGFR,SOX9,SPP1,VCAM1	308 (24)
BAK1		other	Activated	2.433	bias	0.000514	H2-T10,HLA-A,IL15,IRF7,Mx1,TRIM6-TRIM34	118 (8)
KLF4		transcription regulator	Activated	3.138	bias	0.000529	ALPL,BMPER,CCND1,CDKN2B,CLDN7,CYP26A1,DLL1,FOXF1,GBP4,HES1,HSPB1,IRX3,Oasl2,PDGFRA,PEG3,PPL,PROM1,TEAD1,TEAD2,USP18,VCAM1	280 (12)
EGLN		group	Inhibited	-3.805	bias	0.000571	A1BG,ALDOC,APOA4,EFNA1,Hamp/Hamp2,IKBIP,LCN2,Orm1 (includes others),PPP1R3G,RAB11FIP5,RRAGD,SAA1,SERPINA7,SOX9,WWTR1
CLEC1B		transmembrane receptor	Activated	2	bias	0.000583	LCP2,PLCG2,SPP1,SYK
MECOM		transcription regulator	Activated	2.396	bias	0.000619	Cdkn1c,ITGA6,ITGB3,Ly6a (includes others),PBX1,SOX9
APEX1		enzyme	Activated	2.236	bias	0.000619	ABCB1,EGR1,HTRA1,JUNB,NR4A1,RGS2	146 (7)
EIF2AK2		kinase	Activated	2.926	bias	0.000619	ATF3,CCND1,EGR1,GABBR1,IRS2,ISG15,ISG20,OAS1,PARP12,STAT1,USP18	202 (15)
POMC		other	Activated	2.012	bias	0.000675	CYP17A1,DCT,H19,ICAM1,IGF2,JUNB,NR4A1,NR4A2,PPARGC1A,SULT2A1,VCAM1	326 (20)
SMAD3		transcription regulator	Activated	2.909	bias	0.000704	APOA4,CCND1,CDKN2A,CDKN2B,CKM,EGR1,ELN,FNDC5,GLS,Hamp/Hamp2,IL15,INPP5D,JUNB,Ly6a (includes others),Orm1 (includes others),PPARGC1A,PTP4A3,SLC25A4,SLC51B,SPP1	338 (23)
JUN		transcription regulator	Activated	2.57	bias	0.00071	ABCB1,AFP,AR,ATF3,AXL,BCL9,CCND1,CDKN2A,CFP,CYP17A1,EHD4,EZR,GAS6,HES1,ICAM1,IRS2,JUNB,LBP,MYLPF,NQO1,NR4A1,PTGDS,PXDN,SAA1,SPP1,STAT1,SULF2,SULT2A1,SYK,VCAM1,ZNF385A	284 (20)
P38 MAPK		group	Activated	3.862	bias	0.000727	AQP4,ATF3,CCND1,CD83,CDKN2A,EGR1,HTRA1,ICAM1,IRF7,IRX1,ITGB2,ITGB3,JUNB,MAP4K4,MYLPF,NGFR,NR4A1,PPARGC1A,SCNN1A,STAT1,Tgtp1/Tgtp2,TLR2,TNNC2,TNNT3,TOP2A,VCAM1	299 (19)
TCR		complex	Activated	2.499	bias	0.000727	APOA4,CCND1,COMMD3-BMI1,DHX58,EGR1,GBP4,GRIA3,IFI44,IFIH1,IFIT2,IFIT3,IRF7,ISG15,ISG20,JUNB,LCP2,LDHB,NR4A1,OAS1,PIK3CD,PIM1,PTPRC,SLC1A5,SPP1,STAT1,ZAP70	229 (19)
PI3K (complex)		complex	Activated	2.693	bias	0.00073	ABCC4,ATF3,CCND1,CDKN2B,H19,ICAM1,IGF2,ITGA6,ITGB2,LCN2,NQO1,NR4A2,PIM1,RASA3,RGS2,SLC12A6,SOX9,SPI1,SPP1,TXNIP,TYMP,VCAM1	348 (20)
TAB1	1.65	enzyme	Inhibited	-2.449	bias	0.00074	GBP2,IFIH1,IRF7,RGS2,SAA1,XAF1	232 (13)
Tnf (family)		group	Activated	2.281	bias	0.000745	ATF3,CCND1,CD163,CYP2B6,CYP3A5,ICAM1,LCN2,NT5E,PLEK2,SAA1,Saa3,TLR2,TYMP,VCAM1	280 (19)
TCF3		transcription regulator	Activated	2.256	bias	0.000788	ADA,ATF3,CA2,CDKN2A,CDKN2B,CDKN2C,CERK,CKM,CREB3L2,DAB2IP,Ifi27,LMO2,Ly6a (includes others),MKI67,NTRK2,PLCG2,RASGRP2,RASSF4,RGS16,SAMD9L,SERPINB1,TOP2A,TOX,ZBP1	189 (7)
Gm21596/Hmgb1		transcription regulator	Activated	2	bias	0.000822	AFP,H19,HOXD9,PKM,PROM1	196 (7)
FEV		transcription regulator	Activated	2.071	bias	0.000898	EFNA5,GRIA3,HTRA1,ICAM1,PYGB,SLC22A3,SLC25A36,SLC7A8,SOX9,VCAM1
INSIG1		other	Inhibited	-3	bias	0.000942	IRF8,IRS2,LCN2,LPL,MARCO,PLD1,RAB27A,Scd2,SELPLG,STEAP2,UCP2

## Sheet: S4D Table_All_down
S4D Table_All_down
All genes down-regulated in MDKO												All genes down-regulated in FDKO
Upstream Regulator	Expr Fold Change	Molecule Type	Predicted Activation State	Activation z-score	Flags	p-value of overlap	Target Molecules in Dataset	Mechanistic Network				Upstream Regulator	Expr Fold Change	Molecule Type	Predicted Activation State	Activation z-score	Flags	p-value of overlap	Target Molecules in Dataset	Mechanistic Network
STAT5B		transcription regulator	Inhibited	-3.165		7.32e-16	Adh6-ps1,ALAS2,CCNE1,Cyp2b13/Cyp2b9,CYP2C8,Cyp2d9 (includes others),CYP4A22,Eci3,EGFR,ELOVL3					SCAP		other	Inhibited	-4.585	bias	3.59e-26	AACS,ACACA,ACACB,ACLY,ACSS2,ELOVL6,FASN,FDFT1,FDPS,GPAM,Gstt3,HES6,HMGCR,MSMO1,PCSK9,PDK1,RDH11,SCD,SQLE,STARD4,THRSP,TMEM97	75 (11)
PPARG		ligand-dependent nuclear receptor	Inhibited	-3.109	bias	3.93e-10	ABCG2,ACSL1,ADRB3,ARG1,CES1,CFD,CIDEC,CYP26A1,EGFR,ELOVL3	75 (9)				POR		enzyme	Activated	2.728	bias	3.24e-22	ACLY,Akr1c14,ALDH1A1,CYP26A1,CYP2A6 (includes others),CYP2C8,ELOVL1,ELOVL3,ELOVL6,FDFT1,FDPS,FGF1,GCK,GSTA3,Gstt3,HMGCR,HSD3B1,Hsd3b4 (includes others),HSPH1,MSMO1,SCD,Slco1a4,SQLE,STARD4,TMEM97
Gcg		other	Activated	2.53	bias	4.98e-10	ARG1,CES1,CYP2C8,Hamp/Hamp2,ME1,Mup1 (includes others),PEX11A,RARRES1,Slco1a1,VNN1					SREBF1		transcription regulator	Inhibited	-4.753	bias	4.41e-22	AACS,ACACA,ACACB,ACLY,ACSS2,AK4,ELOVL6,FASN,FDFT1,FDPS,GCK,GPAM,Gstt3,HMGCR,KLK3,MSMO1,PCSK9,PDK1,PKLR,PLTP,RDH11,S100A13,SCD,SERPINA1,SQLE,STARD4,THRSP,TMEM97	93 (19)
AR		ligand-dependent nuclear receptor	Inhibited	-2.473	bias	2.13e-08	Akr1c19,ALDH1A1,ARG1,C4A/C4B,Ces1e,EGFR,GSTP1,HOPX,HSD3B1,HSPH1	48 (3)				SREBF2		transcription regulator	Inhibited	-4.151	bias	2.11e-20	AACS,ACACA,ACLY,ACSS2,ELOVL6,FASN,FDFT1,FDPS,HES6,HMGCR,MSMO1,PCSK9,RDH11,SCD,SQLE,STARD4,THRSP,TMEM97	100 (19)
NR1I3		ligand-dependent nuclear receptor	Inhibited	-2.442	bias	3.99e-08	ALDH1A1,CYP27A1,Cyp2b13/Cyp2b9,CYP2C8,CYP2F1,CYP7B1,GSTP1,RARRES1,UGT2B17,UGT2B28					FGF19		growth factor	Activated	2.772		2.71e-18	ACACA,ACACB,ACLY,ALDH1A1,CTSE,Cyp2d9 (includes others),ELOVL3,FASN,FDPS,GCK,HMGCR,PKLR,SCD,SERPINA1,SLC10A2,SQLE,THRSP	68 (11)
NFE2L2		transcription regulator	Inhibited	-2.462	bias	2.95e-07	ABCG2,ADH7,ALAS2,AOX1,CA3,CFD,CREG1,CYP4A22,GBE1,GSTP1					MLXIPL		transcription regulator	Inhibited	-3.263	bias	1.16e-17	ACACA,ACACB,ACLY,ACSS2,ELOVL6,FASN,GCK,GPAM,HMGCR,MID1IP1,PKLR,SCD,THRSP	57 (7)
HNF1A		transcription regulator	Inhibited	-3.239	bias	5.76e-06	Akr1c19,AKR1C4,APOM,CCNE1,CYP27A1,FOXA3,GBE1,HNMT,HOPX,SERPINA1	53 (4)				INSIG2		other	Activated	2.937	bias	2.07e-15	ACACA,ACLY,ELOVL6,FASN,FDFT1,FDPS,GPAM,HMGCR,SCD	69 (8)
HNF4A		transcription regulator	Inhibited	-3.212		8.57e-06	ABHD6,ACSL1,AKR1C4,ALDH1A1,APOM,ARG1,C4A/C4B,C6,CAPN8,CCNE1	53 (4)				INSIG1		other	Activated	3.773	bias	3.98e-14	AACS,ACACA,ACACB,ACLY,ACSS2,ELOVL1,ELOVL6,FASN,FDFT1,FDPS,GPAM,HMGCR,SCD,SQLE,STARD4	76 (10)
CTNNB1		transcription regulator	Inhibited	-3.422	bias	3.03e-05	Akr1c14,ALDH1A1,C6,CA3,CCNE1,CFD,CIDEC,CREG1,Cyp2d9 (includes others),CYP7B1	77 (9)				ATP7B		transporter	Inhibited	-3.317		6.25e-14	AACS,ACLY,Cyp2c40 (includes others),ELOVL6,FASN,FDFT1,FDPS,HMGCR,MSMO1,SQLE,THRSP
NR3C1		ligand-dependent nuclear receptor	Inhibited	-2.422		4.07e-05	C4A/C4B,CIDEC,CYP27A1,CYP2C8,GSTP1,Hsd3b4 (includes others),INHBA,KLK3,LAD1,NAMPT	99 (9)				ACOX1		enzyme	Inhibited	-2.546		4.66e-13	AKR1C4,BAAT,CES3,CTSE,CYP26A1,Cyp2c54 (includes others),CYP2C8,Cyp2d9 (includes others),ELOVL3,FASN,GSTP1,HSD3B1,Mup1 (includes others),PHLDA1,SERPINA1,SLC22A25	67 (7)
FST		other	Inhibited	-2.2		0.000317	ACSL1,CTRB2,ELOVL3,Mup1 (includes others),SERPINA1					RXRA		ligand-dependent nuclear receptor	Inhibited	-2.447		8.02e-13	ACACA,ACACB,ALDH1A1,APOM,BAAT,CEBPE,CYP26A1,FASN,FOXA1,GCK,MID1IP1,ONECUT1,PKLR,PLTP,RORC,SCD,SLC10A2,Slco1a4,THRSP,UGT1A7 (includes others),WEE1	96 (21)
Ins1		other	Inhibited	-2.345	bias	0.000437	ALAD,CCNE1,CFD,Cyp2d9 (includes others),ELOVL6,GSTP1,LIFR,SERPINA12,SYT3,TAT					Insulin		group	Inhibited	-3.079	bias	2.66e-12	ACACA,ACLY,APOM,CA3,ELOVL3,ELOVL6,FASN,GCK,GSTP1,HMGCR,HSP90AA1,INHBA,KLK3,MCM6,ME1,MYC,PCSK9,PDK1,PER2,PRKAA2,SCD,SFTPA1,SLC10A2,SQLE,THRSP	101 (18)
MED1		transcription regulator	Inhibited	-2.433	bias	0.000497	CCNE1,CFD,GSTP1,KLK3,LAD1,PEX11A,SCP2	32 (3)				HNF1A		transcription regulator	Inhibited	-3.773	bias	4.39e-12	Akr1c19,AKR1C4,APOM,CYP27A1,FOXA2,GBE1,GCK,HMGCR,HNMT,HOPX,MID1IP1,ONECUT1,PCSK9,PDK1,PKLR,SERPINA1,SLC10A2,Slco1a1,Slco1a4,TFRC,UGT1A7 (includes others),UGT2A3,UGT2B17,UGT2B7,ZBTB20	72 (8)
DUSP1		phosphatase	Inhibited	-2.433		0.00054	CIDEC,EGFR,ELOVL3,PEX11A,SERPINA12,VNN1	45 (5)				NR1I3		ligand-dependent nuclear receptor	Inhibited	-2.305	bias	2.83e-11	ALDH1A1,CYP27A1,CYP2A6 (includes others),Cyp2b13/Cyp2b9,CYP2C8,CYP2F1,FASN,GSTP1,MYC,SCD,Slco1a4,THRSP,UGT2B17	87 (9)
EGF		growth factor	Inhibited	-2.522	bias	0.000687	ABCG2,CCNE1,CTRB2,EGFR,EZH1,GSTP1,INHBA,KLK3,SERPINA1,SYT3	86 (12)				FOXA2	-1.712	transcription regulator	Inhibited	-2.309	bias	2.7e-10	Akr1c14,APOM,CA3,CYP26A1,CYP2A6 (includes others),FOXA1,FOXA2,GCK,HES6,IGFBP5,ONECUT1,RORC,SCD,SERPINA1,SFTPA1,UGT2B17	86 (13)
EPAS1		transcription regulator	Inhibited	-2.387	bias	0.000776	ABCG2,ARG1,EGFR,FMO5,GBE1,NAMPT,PFKFB3,UNG					MLX		transcription regulator	Inhibited	-2.588	bias	3.79e-10	ACACA,ELOVL6,FASN,MID1IP1,PKLR,SCD,THRSP	13 (2)
												Ins1		other	Inhibited	-3.088	bias	9.09e-10	ACACA,ALAD,Cyp2d9 (includes others),ELOVL6,FASN,FDFT1,FOXA1,FOXA2,GCK,GSTP1,HMGCR,IGFBP5,MYC,PKLR,SCD,SFTPA1,SYT3,THRSP	111 (20)
												ARNTL		transcription regulator	Inhibited	-2.751	bias	9.44e-10	ACACA,CRY1,ELOVL6,FASN,GCK,GPAM,PER2,SCD,WEE1	86 (14)
												MBTPS1		peptidase	Inhibited	-2.449	bias	9.76e-10	ACACA,FASN,FDFT1,FDPS,HMGCR,SCD	73 (6)
												ZBTB20	-1.512	transcription regulator	Inhibited	-2.333		1.13e-09	ACSS2,CISH,Cyp2b13/Cyp2b9,Cyp2c54 (includes others),CYP2C8,CYP2F1,FASN,GCK,UGT2B17	63 (6)
												PPARGC1B		transcription regulator	Inhibited	-3.097	bias	1.26e-09	ACACA,ACACB,FASN,FDFT1,FDPS,GCK,GPAM,HMGCR,SCD,SQLE	68 (13)
												NR5A2		ligand-dependent nuclear receptor	Inhibited	-2.398	bias	3.59e-09	APOM,BAAT,FASN,FOXA2,GPT2,HMGCR,Hspa1b,KLK3,MYC,ONECUT1,SLC10A2	89 (12)
												ACACB	-1.985	enzyme	Activated	2.216	bias	4.45e-09	ACACA,ACACB,ACLY,FASN,HMGCR,SCD	68 (13)
												PPARG		ligand-dependent nuclear receptor	Inhibited	-3.541	bias	7.61e-09	ACACA,ACLY,CES1,CYP26A1,ELOVL3,ELOVL6,FASN,FDPS,FGF1,FOXA2,GCK,GPAM,GSTA3,HMGCR,IGFBP5,ME1,PCTP,RORC,SCD,SERPINA1,UGT1A7 (includes others)	104 (19)
												CTNNB1		transcription regulator	Inhibited	-3.008	bias	1.06e-08	ACACA,ACLY,Akr1c14,ALDH1A1,CA3,CYP2A6 (includes others),Cyp2d9 (includes others),ELOVL3,FASN,FOXA2,FOXQ1,FZD7,GPAM,HMGCR,Hsd3b4 (includes others),IGFBP5,KLK3,ME1,Mup1 (includes others),MYC,NUDT7,SCD,SERPINA1,Slco1a1,TGM1,TNNC1,WNT5B	108 (18)
												INSR		kinase	Inhibited	-3.138	bias	3.84e-08	ALAD,CRY1,EZH1,FASN,FDFT1,FDPS,GAS1,GCK,HMGCR,MCM2,MCM5,MSMO1,MYC,NAMPT,PHLDA1,PKLR,SCD,SQLE	113 (22)
												NRG4		growth factor	Activated	2.215	bias	4.97e-08	ACACA,FASN,GCK,ME1,SCD	54 (7)
												DBI		other	Inhibited	-2.236	bias	4.97e-08	ACSS2,ELOVL6,FASN,HMGCR,SQLE	73 (7)
												NR1D1		ligand-dependent nuclear receptor	Inhibited	-2.236		5.36e-08	ACACA,ACLY,CRY1,FASN,ME1,NAMPT,RORC	24 (3)
												NCOA2		transcription regulator	Inhibited	-2.359	bias	8.83e-08	ALAS2,APOM,Cyp2c40 (includes others),ELOVL6,FASN,GBE1,GCK,HMGCR,KLK3,PLTP	30 (4)
												HOXA10		transcription regulator	Activated	2.309	bias	1.36e-07	ALAS2,ALDH1A1,CA3,CYP2F1,GSTA3,HMGCR,HSP90AA1,IGFBP5,INMT,ME1,SCD,THRSP
												ELOVL5		enzyme	Activated	2.423	bias	1.91e-07	ACACA,ELOVL6,FASN,GPAM,PLTP,SCD	75 (10)
												NR1H3		ligand-dependent nuclear receptor	Inhibited	-3.382		2.01e-07	ACACA,APOM,FASN,FDFT1,FDPS,GCK,GPAM,GSTP1,HMGCR,MID1IP1,PKLR,PLTP,SCD	77 (17)
												Nr1h		group	Inhibited	-2.764	bias	2.02e-07	ACACA,ACACB,ACLY,ALDH1A1,ELOVL6,FASN,FGF1,GCK,GPAM,PLTP,SCD	89 (18)
												ERBB2		kinase	Inhibited	-3.883	bias	2.18e-07	ACSS2,ALAD,CES1,DPT,ESR1,FASN,FOXA1,GBE1,GDPD3,GPAM,HMGCR,IGFBP5,KLK3,LSR,MCM2,MCM5,MCM6,mir-21,MYC,PDK1,POLA1,SQLE,TGM1,WNT5B	96 (18)
												FASN	-1.959	enzyme	Inhibited	-2.804	bias	2.5e-07	ACACA,ACLY,ELOVL6,FASN,FGF1,GPAM,PKLR,SCD	79 (14)
												NR1H2		ligand-dependent nuclear receptor	Inhibited	-2.677		5.14e-07	ACACA,ELOVL6,FASN,FDFT1,FDPS,GCK,HMGCR,PLTP,SCD	100 (20)
												SFRP1		transmembrane receptor	Activated	2.646	bias	5.81e-07	ACACA,ACLY,ELOVL6,FASN,MYC,NAMPT,SCD	92 (15)
												IGF1		growth factor	Inhibited	-3.483	bias	7.13e-07	ACACA,ACSS2,CISH,ESR1,FASN,FOXA1,GCK,HDC,HMGCR,HSD3B1,IGFBP5,MYC,PHLDA1,SCD,SQLE,SRM,THRSP,WEE1	107 (18)
												PXR ligand-PXR-Retinoic acid-RXRŒ±		complex	Inhibited	-2.433	bias	1.77e-06	ALDH1A1,CES3,CYP2A6 (includes others),CYP2C8,SCD,UGT1A7 (includes others)
												USF2		transcription regulator	Inhibited	-2.186	bias	1.93e-06	FASN,GCK,KLK3,MYC,PKLR,RORC,THRSP
												CYP7A1		enzyme	Inhibited	-2.219		1.94e-06	ACACA,FASN,FDFT1,FDPS,HMGCR	102 (18)
												LAMTOR1		other	Inhibited	-2	bias	3.39e-06	ACACA,FASN,SCD,SQLE	71 (9)
												PML		transcription regulator	Activated	2.014		3.46e-06	ACACA,ACACB,CEBPE,ELOVL6,FASN,GPAM,HMGCR,MCM6,ME1,SCD	81 (10)
												SH3TC2		other	Inhibited	-2.236	bias	6.55e-06	AACS,ACLY,FDPS,HMGCR,SQLE
												LMNB1		other	Activated	2.213	bias	7.63e-06	FASN,HMGCR,MSMO1,S100A13,SCD,SQLE
												LPIN1		phosphatase	Inhibited	-2.19	bias	7.8e-06	ACACA,FASN,FDPS,HMGCR,SCD	96 (14)
												EGF		growth factor	Inhibited	-2.25	bias	8.36e-06	CEBPE,CISH,ESR1,EZH1,FASN,FOXA2,GAS1,GSTP1,IGFBP5,INHBA,KLK3,MYC,SCD,SERPINA1,SYT3,TGM1,UGT2B17	107 (22)
												MTORC1		complex	Inhibited	-2.25	bias	9.58e-06	FASN,FDPS,HMGCR,MYC,RORC,SCD	89 (13)
												PCYT2		enzyme	Activated	2	bias	1.21e-05	FASN,GPAM,PKLR,SCD
												PPARD		ligand-dependent nuclear receptor	Inhibited	-2.575	bias	1.23e-05	ACACA,ACACB,ASIC5,FASN,GCK,GPAM,PCSK9,PDK1,PKLR,SCD,SLC10A2	87 (18)
												NPPB		other	Activated	2.219	bias	1.27e-05	FDFT1,GSTA3,HMGCR,HSD3B1,MSMO1
												FBXW7		enzyme	Activated	2.376	bias	1.79e-05	FDFT1,GPAM,HMGCR,HSPH1,MYC,SQLE
												ATP2A2		transporter	Activated	2	bias	2e-05	ACACB,FASN,SCD,SYT3
												ACSS2	-2.14	enzyme	Inhibited	-2	bias	3.84e-05	FASN,GPAM,HMGCR,SCD	72 (7)
												RPTOR		other	Inhibited	-2.621	bias	3.91e-05	CTSK,FDFT1,FDPS,HMGCR,MSMO1,MYC,SQLE	85 (13)
												PEBP1		other	Inhibited	-2.236		4.25e-05	ACACA,ACLY,ELOVL6,FASN,SCD
												MFSD2A		transporter	Activated	2	bias	4.65e-05	FASN,FDFT1,SCD,STARD4
												N-cor		group	Activated	2.425	bias	4.74e-05	ACACA,ACACB,ELOVL6,ESR1,FASN,GSTP1,SCD	113 (17)
												LHX1		transcription regulator	Inhibited	-2.646	bias	5.37e-05	FOXA2,Hsd3b4 (includes others),Keg1,PKDCC,SERPINA6,SLC16A12,SLC16A13
												AGT		growth factor	Inhibited	-2.596	bias	0.000134	FASN,FDFT1,GSTA3,GSTP1,HMGCR,HSD3B1,Hspa1b,IGFBP5,mir-21,MSMO1,MYC,NAMPT,PALLD,TFRC	98 (13)
												STAT3		transcription regulator	Inhibited	-2.026	bias	0.000161	ALAS2,ALDH1A1,CYP26A1,ESR1,FASN,IFI16,IGFBP5,KLK3,mir-21,MYC,NAMPT,PCSK9,PDK1,PHLDA1,RORC,SERPINA1	115 (20)
												GCK	-1.858	kinase	Inhibited	-2		0.000165	ACLY,FASN,PKLR,SCD	89 (18)
												CEBPB		transcription regulator	Inhibited	-2.377	bias	0.000188	ADH7,ALDH1A1,CYP2A6 (includes others),Cyp2d9 (includes others),GAS1,HDC,HSP90AA1,INMT,MYC,PCTP,SCD,SERPINA1,SFTPA1	55 (6)
												ADIPOQ		other	Inhibited	-2.619		0.00024	ACACA,ACACB,ACLY,FASN,GCK,mir-21,PRKAA2,SCD	102 (17)
												Vegf		group	Inhibited	-3.058	bias	0.000298	Akr1c14,APOM,CRY1,HDC,HOPX,INHBA,MCM2,MCM5,mir-21,MYC,NAMPT,NLRP12,PHLDA1,PKDCC	86 (15)
												RABL6		other	Inhibited	-2.236	bias	0.000347	MCM2,MCM5,MYC,POLA1,TMEM97	65 (7)
												MAF		transcription regulator	Inhibited	-2.219	bias	0.0004	ACSS2,FDFT1,HMGCR,RORC,SQLE
												GHRL		growth factor	Inhibited	-2.182		0.0004	ACACA,FASN,GPAM,PRKAA2,SCD	91 (17)
												MYC	-2.511	transcription regulator	Inhibited	-2.414	bias	0.000431	ACACA,CEBPE,CYP26A1,EZH1,FASN,FOXA2,GAS1,GCK,HSP90AA1,Hspa1b,HSPH1,IFI16,INHBA,MCM5,MCM6,MYC,PDK1,PKLR,SERPINA1,SRM,TFRC,TGM1,TMEM97	72 (11)
												JUN		transcription regulator	Inhibited	-2.399	bias	0.000542	ADH7,APOM,CA3,FOXA1,FOXA2,GSTP1,IFI16,mir-21,MYC,PDK1,SCD,SLC10A2,TNNC1	97 (12)
												MYD88		other	Inhibited	-2.813	bias	0.000969	AK3,ALDH1A1,CISH,CTSK,HDC,IGFBP5,INHBA,MCM2,MYC	112 (19)

## Sheet: S4E Table_All_responsive
S4E Table_All_responsive
All responsive genes in MDKO												All responsive genes in FDKO
Upstream Regulator	Expr Fold Change	Molecule Type	Predicted Activation State	Activation z-score	Flags	p-value of overlap	Target Molecules in Dataset	Mechanistic Network				Upstream Regulator	Expr Fold Change	Molecule Type	Predicted Activation State	Activation z-score	Flags	p-value of overlap	Target Molecules in Dataset	Mechanistic Network
SMTNL1		transcription regulator	Inhibited	-3.585		4.25e-28	A1BG,ABCB1,ACOT11,Adh6-ps1,ALAS2,AR,BMF,CA2,CCND1,CCNE1,CD276,Cdkn1c,CORIN,CUX2,CYP17A1,Cyp2a12/Cyp2a22,Cyp2b13/Cyp2b9,CYP2B6,CYP2C8,Cyp2d9 (includes others),CYP3A5,CYP4A11,CYP4A22,Eci3,EGFR,ELOVL3,FAM126A,FBLN1,G0S2,GSTP1,Hamp/Hamp2,HAO2,HSD3B2,Hsd3b4 (includes others),IL2RB,Keg1,LAMA3,MB,ME1,MTMR11,Mup1 (includes others),NAT8,NIPAL1,NQO1,NR4A2,NT5E,PDZRN3,PIM1,PPP1R3C,PROM1,RAD51B,SLC15A5,SLC16…	489 (24)				FGF19		growth factor	Activated	3.092		8.5e-27	ACACA,ACACB,ACLY,ALDH1A1,AQP4,CCND1,CTSE,CYP17A1,Cyp2d9 (includes others),Cyp4a14,EGR1,ELOVL3,FDPS,GCK,HMGCR,HSD3B2,IGFBP1,IL1RN,LCN2,LEPR,PEG3,PKLR,PROM1,PTGDS,RGS16,RGS2,SCD,Scd2,SERPINA1,SLC10A2,SLC2A5,SQLE,THRSP	276 (18)
SAV1		cytokine	Activated	5.28		1.22e-22	ABCB1,ADCY7,AIF1,ALPL,AQP11,ARG1,ATF3,BMF,C1QA,C4A/C4B,CCND1,CCRL2,CD163,CD276,CD5L,CD63,CD83,CDH13,CDKN2A,CDKN2B,CENPM,CFP,CHAC1,CLIC5,CMPK2,CORO1A,CSF2RB,CTSC,CYBA,CYP27A1,DCT,DDX60,Defb1,DLL1,DOK1,EGR1,ELN,ENTPD2,FBLN1,FCGR3A/FCGR3B,FGF1,FGL2,GAL3ST1,GAS6,GBP2,GBP4,GBP5,GBP6,GBP7,GDF15,GLS,GNA14,GSTP1,HCK,HLA-A,HLA-DMB,HLA-F,HSP90AA1,HSPB1,HTRA1,ICAM1,Ifi202b,IFI44,IFIH1,IFIT1B,IFIT2,IFIT3,Igt…	386 (20)				PPARA		ligand-dependent nuclear receptor	Activated	2.044		1.56e-26	ACACA,Acot6,ACSS2,AGXT,APOA4,APOC2,APOM,ASNS,CCND1,CD63,CDKN2A,CES3,CSAD,CTSE,CYP27A1,CYP2B6,Cyp2c40 (includes others),Cyp2c54 (includes others),CYP2C8,Cyp4a14,ELOVL3,ELOVL6,ETHE1,FBXO21,FDFT1,FDPS,FGF21,FITM1,GCK,GLS,GPAM,GSTP1,H2-T10,HMGCR,HSD3B1,IGFBP1,IGFBP5,IL1RN,KRT23,LPL,LY6D,ME2,mir-21,MSMO1,Mup1 (includes others),MYC,NR1D1,Orm1 (includes others),PCTP,PDK4,PHLDA1,PKLR,PLIN2,PLTP,PTGR1,QPC…	274 (21)
CYB5R4		enzyme	Inhibited	-2.231		1.57e-22	ACSL1,AKR1C4,APCS,CD63,COL4A2,CTSE,CYP26A1,Cyp2c54 (includes others),CYP2C8,Cyp2d9 (includes others),Cyp3a25 (includes others),CYP4A11,Cyp4a14,CYP4F12,CYP7B1,EGFR,ELOVL3,FAM214A,GSTP1,H2AX,HSD3B1,KRT23,LCN2,LPL,MFGE8,Mup1 (includes others),NUPR1,OAT,Orm1 (includes others),PEX11A,QPCT,RAD51B,RGS2,Saa3,SELENBP1,SERPINA1,SLC22A25,TM4SF4,TRIB3,UCP2,Vnn3	233 (7)				POR		enzyme	Activated	2.231		1.38e-25	ACLY,Akr1c14,ALDH1A1,ALDH1A2,APOA4,ASNS,BTC,CAPRIN2,CD74,CSAD,CYP17A1,CYP26A1,CYP2A6 (includes others),CYP2B6,CYP2C18,CYP2C8,ELOVL1,ELOVL3,ELOVL6,ETHE1,FDFT1,FDPS,FGF1,GADD45B,GBP2,GCK,GSTA3,GSTA5,Gstt3,HLA-A,HMGCR,HSD3B1,Hsd3b4 (includes others),HSPH1,IHH,LPL,MSMO1,PDK4,SCD,Scd2,Slco1a4,SQLE,STARD4,TMEM97
MIR17HG		transcription regulator	Activated	5.797	bias	2.92e-21	ABCB9,ALAS2,ALPK1,APOBEC3B,APOC2,ARG1,AXL,C4A/C4B,CCND1,CCNE1,CCRL2,CLIC5,CMPK2,CSF3R,CYP2C8,Cyp2d9 (includes others),CYP3A5,CYP4A11,DDX60,EGR1,FGL2,GBP2,GBP4,GBP5,GBP6,GLS,HES1,HTRA1,ICAM1,IFI44,IFIH1,IFIT1B,IFIT2,IFIT3,Igtp,IL15,IRF7,IRF8,ISG15,LCN2,Ly6a (includes others),LY6E,Mx1,NLRC5,OAS1,OAS2,Oasl2,PDGFC,PIM1,PSMB9,RTP4,SAMD9L,SLC51B,Slfn2,SP110,STAT1,TAP1,Tgtp1/Tgtp2,TYMP,USP18,Wfdc17,XAF1…	386 (19)				SCAP		other	Inhibited	-3.556	bias	5.27e-22	AACS,ACACA,ACACB,ACLY,ACSS2,ASNS,ATF3,CSAD,CYP2B6,ELOVL6,FDFT1,FDPS,GPAM,Gstt3,H2-Q8,HES6,HMGCR,MSMO1,PCSK9,PDK1,RDH11,SCD,Scd2,SQLE,STARD4,TFF3,THRSP,TMEM97,TRIB3	214 (10)
SPDEF		ligand-dependent nuclear receptor	Activated	2.369	bias	9e-21	ABCG5,APOA4,BHMT,CDKN2A,CYP27A1,Cyp2b13/Cyp2b9,CYP2B6,Cyp2c54 (includes others),CYP2C8,CYP2F1,Cyp3a25 (includes others),CYP3A5,CYP46A1,CYP4A11,Cyp4a14,CYP7B1,ELOVL3,ELOVL6,GSTM2,GSTP1,HSD3B1,Hsd3b4 (includes others),Keg1,LCN2,LRTM1,Mt1,Mt2,Mup1 (includes others),NAT8,NR1D1,NTRK2,PPARGC1A,PPP1R3C,RDH16,RHBG,Saa3,Scd2,SELENBP1,SLC39A5,Slco1a1,SULF2,Sult1a1,SULT2A1,Sult5a1,UCP2					ACOX1		enzyme	Inhibited	-4.17		1.7e-20	AKR1C4,BAAT,CD63,CES3,COL4A2,CTSE,CYP26A1,Cyp2c54 (includes others),CYP2C8,Cyp2d9 (includes others),Cyp4a14,ELOVL3,GSTP1,HSD3B1,IGFBP1,KRT23,LCN2,LHPP,LPL,LY6D,MFGE8,Mup1 (includes others),NUPR1,OAT,Orm1 (includes others),PDK4,PHLDA1,PIGP,PLIN2,QPCT,RGS2,SERPINA1,SLC22A25,TRIB3,UCP2	165 (7)
Alpha catenin		enzyme	Inhibited	-4.69	bias	2.12e-17	Apol9a/Apol9b,CMPK2,DTX3,GBP2,GBP4,GBP6,IFI44,IFIH1,IFIT1B,IFIT3,IRF7,ISG15,OAS1,Oasl2,PARP12,RTP4,SAMD9L,STAT1,Tgtp1/Tgtp2,Trim30a/Trim30d,USP18,XAF1	343 (12)				CTNNB1		transcription regulator	Activated	2.202	bias	4.95e-18	ACACA,ACLY,Akr1c14,ALDH1A1,ALDH1A2,AQP4,AR,BMF,CA3,CASC4,CCND1,CCND2,Cdkn1c,CDKN2A,CDKN2B,COL4A1,COL4A2,COL4A5,COMMD3-BMI1,CYP2A6 (includes others),Cyp2d9 (includes others),EGR1,ELOVL3,FAM126A,FOXA2,FOXQ1,FZD7,GADD45B,GPAM,HMGCR,Hsd3b4 (includes others),HTRA1,IGF2,IGFBP5,IHH,ITGA6,KLK3,LHX2,LHX6,LMO2,LPL,LY6E,ME1,MFGE8,MMP15,Mup1 (includes others),MYC,NGFR,NR4A1,NUDT7,OAT,OLIG1,PEG3,PLAU,PROM1,QP…	310 (20)
Immunoglobulin		transcription regulator	Inhibited	-5.422	bias	2.57e-17	Apol9a/Apol9b,CA2,CMPK2,DDX60,DHX58,GBP2,GBP4,Ifi27l2a/Ifi27l2b,IFI44,IFIH1,IFIT1B,IFIT2,IFIT3,Igtp,IRF7,IRGM,ISG15,Ly6a (includes others),OAS1,PARP12,PSMB9,RTP4,SAMD9L,SPP1,STAT1,TAP1,Tgtp1/Tgtp2,TLR2,TRIM6-TRIM34,UBA7,USP18	126 (7)				SREBF1		transcription regulator	Inhibited	-2.909	bias	8.01e-18	AACS,ACACA,ACACB,ACLY,ACSS2,AK4,AR,Bhlhe41,CSAD,ELOVL6,ETHE1,FDFT1,FDPS,GCK,GLB1,GPAM,GPX3,Gstt3,H2-Q8,HMGCR,IRS2,KLK3,LPL,MSMO1,NUPR1,OAT,PCSK9,PDK1,PKLR,PLTP,PTGDS,RDH11,S100A13,SCD,Scd2,SERPINA1,SORBS3,SQLE,STARD4,THRSP,TMEM97,UCP2	270 (19)
ACKR2		cytokine	Activated	4.949		3.43e-17	ABCG2,ABR,ACKR3,ACSL1,ACTA1,ADRB3,ALAD,APCS,APOBEC3B,APOC2,AR,ARG1,ARRDC3,ATF3,BMPER,C4A/C4B,CA2,CCND1,CCNE1,CD163,CD83,CDC42EP5,CDH13,CDKN2A,CDKN2C,CFD,CIB2,CIDEC,CKM,CLCF1,CLDN7,COL4A3,COTL1,CRY1,CSF2RB,CTDSPL,CTSC,CYBA,CYP17A1,CYP27A1,CYP2C8,CYP7B1,EFNA1,EGFR,EGR1,EMP2,FGFR1,FOXF1,G0S2,GBP2,GBP4,GBP6,GDF15,GLS,GSTM2,GSTP1,H19,Hamp/Hamp2,HCN3,HDC,HES1,HLA-A,HLA-F,HSD3B2,ICAM1,IFIH1,IFIT1B,IFIT3…	411 (17)				IFNG		cytokine	Activated	3.612		1.88e-13	ACLY,ADORA1,ALPL,ASNS,ATF3,BMF,CASP6,CCND1,CCND2,CCRL2,CD276,CD63,CD72,CD74,CD83,CDH13,CDKN2A,CDKN2B,CHAC1,CISH,CLIC5,CTSD,CTSK,CYB561,Cyb5r3,CYP27A1,DDX60,EGR1,ELN,FGF1,GAL3ST1,GBP2,GBP4,GBP6,GBP7,GCK,GDF15,GLS,GNA14,GSTP1,HLA-A,HMGCR,HSP90AA1,HSPB1,HTRA1,IDO2,IFI16,Ifi202b,IFI44,IFIT1B,IL1RN,IL22RA1,INHBA,IRF7,IRS2,ISG15,ISG20,ITGA6,JUNB,LAMP3,LCN2,LCP2,LPL,Ly6a (includes others),LY6E,mir-21,MY…	351 (17)
NR0B1		transcription regulator	Inhibited	-5.423		7.67e-17	ABCB1,AFP,ANO1,AQP11,ARG1,CCND1,CD83,CDKN2A,CDKN2B,CDKN2C,CMPK2,CORO1A,CYP2B6,DDX60,DHX58,EPDR1,FGFR1,GBP6,H2-Q8,HCK,HLA-A,Hsd3b4 (includes others),ICAM1,IFI44,IFIT1B,IFIT3,Igtp,IL2RG,IRF7,IRGM,LAPTM5,LY6E,MAOA,MLH1,NLGN2,NLRC5,NR1D1,NTRK2,OAS1,OAS2,Oasl2,PARP12,PDGFRA,PPARGC1A,PSMB9,RGS16,RTP4,Scd2,SCNN1A,Slfn2,SP110,STAT1,SYNPO,TAP1,Tgtp1/Tgtp2,Trim30a/Trim30d,UBA7,UCP2,USP18,ZNF618	434 (21)				TNF		cytokine	Activated	3.331		4.62e-13	ACACA,ADORA1,ALAD,APOC2,AR,ARID5B,ATF3,BMPER,CA2,CASP6,CCND1,CCND2,CD83,CDH13,CDKN2A,CIB2,CISH,CLCF1,CLDN7,COL4A3,CRY1,CTSK,CYP17A1,CYP27A1,CYP2C8,DVL1,EFNA1,EGR1,EMP2,ESR1,FDPS,FGFR1,FGFR2,GADD45B,GBP2,GBP4,GBP6,GDF15,GLS,GPAM,GSTP1,H19,HCN3,HDC,HLA-A,HMGCR,HSD3B2,IFI16,IFIT1B,IGF2,IGFBP1,IGFBP5,IL1RN,INHBA,IRF7,IRS2,ISG15,ITGA6,JUNB,KLK3,KRT23,LAD1,LAMP3,LBP,LCN2,LPL,LY6D,LYVE1,MFHAS1,MGST2,mir…	351 (17)
EGLN		transcription regulator	Inhibited	-2.007		5.97e-16	ACSL1,ADAM11,ANO1,ARG1,CA2,CIDEC,CMPK2,CYP4A11,Cyp4a14,DHX58,DOCK10,EGR1,FAM126A,FCGR3A/FCGR3B,GBP2,GBP5,GBP6,GBP7,GNA14,HCK,HLA-DMB,HSD3B1,IFI44,IFIH1,IFIT1B,IFIT3,Igtp,IL15,IMPDH1,IRF7,IRS2,ISG15,ISG20,LCP2,LIFR,Ly6a (includes others),LY75,MPEG1,Mx1,PDGFC,PLD1,PLS1,PPARGC1A,PPP3CC,PREX1,PRKCA,RASSF4,Scd2,SELENBP1,SERPINA1,SERPINB6,STK39,SYK,TES,TFF3,Tgtp1/Tgtp2,TNIK,Trim30a/Trim30d,VCAM1,ZBP1	379 (22)				LEP		growth factor	Activated	2.545		7.81e-13	ABCG5,ACACA,ACLY,APOA4,APOM,AR,CA3,CASP6,CCND1,CD63,COL4A1,CYP17A1,Cyp2a12/Cyp2a22,CYP2C18,Cyp2c54 (includes others),CYP2C8,Cyp2d9 (includes others),CYP2F1,CYP3A5,Cyp4a14,EGR1,ELOVL6,ESR1,FGF21,FGFR1,FGFR2,FMO5,GCK,GPAM,GSTA3,HMGCR,IL1RN,IRS2,JUNB,LEPR,LPL,MSMO1,MYC,NAMPT,PER2,PLIN2,PRKAA2,RORC,SCD,Scd2,SPP1,THRSP,UCP2,VCAM1	292 (20)
GMNN		group	Activated	4.769	bias	1.73e-15	APOBEC3B,AXL,GBP2,H2-Q8,HLA-A,IFIH1,IFIT1B,IFIT2,IFIT3,IL15,IRF7,IRF8,ISG15,ISG20,Mx1,NLRC5,OAS1,OAS2,PSMB9,SPP1,STAT1,TAP1,TLR2,USP18,VCAM1,XAF1,ZBP1	288 (19)				SREBF2		transcription regulator	Inhibited	-3.784	bias	1.04e-12	AACS,ACACA,ACLY,ACSS2,ELOVL6,FDFT1,FDPS,HES6,HMGCR,IRS2,MSMO1,PCSK9,PLIN2,RDH11,SCD,SQLE,STARD4,TFF3,THRSP,TMEM97	323 (21)
RUNX3		transcription regulator	Activated	5.264	bias	1.85e-15	CCRL2,CMPK2,DHX58,GBP4,GBP5,Hamp/Hamp2,IFI44,IFIH1,IFIT1B,IFIT2,IFIT3,Igtp,IL15,IRF7,IRF8,IRGM,ISG15,ISG20,Ly6a (includes others),Mx1,NAMPT,OAS1,OAS2,Oasl2,PARP12,PSMB9,RTP4,SAMD9L,STAT1,TAP1,TNFAIP8,Trim30a/Trim30d,UBA7,USP18,XAF1,ZBP1	199 (15)				IL1B		cytokine	Activated	3.214		1.79e-12	ACPP,ALPL,APOC2,AQP4,ATF3,BMF,CCRL2,CD74,CD83,Cdkn1c,CISH,Cyb5r3,CYP2B6,CYP3A5,EFNA1,EGR1,ELN,ESR1,FGFR2,GADD45B,GBP2,GBP6,GCK,GDF15,H19,HLA-A,HSPB1,IFI16,IFIT1B,IGFBP1,IGFBP5,IL1RN,INHBA,IRF7,IRS2,ISG15,ISG20,JUNB,LBP,LCN2,mir-21,MYC,NAMPT,NIBAN1,NR1D1,NR4A1,NR4A2,NTRK1,PDGFRA,PDK1,PHLDA1,PIM1,PLAU,PLD1,PTGDS,PTGIS,RGS16,RORC,S100A8,S100A9,SAA1,SLC10A2,SLC1A2,SLC25A4,Slco1a1,Slco1a4,SOX9,SPP1,TG…	346 (17)
MST1		transcription regulator	Activated	2.59	bias	5.05e-15	ABCB1,AFP,Akr1c14,ALDH1A1,ALDH1A2,AQP4,AR,BMF,BMP7,C6,CA3,CASC4,CCND1,CCNE1,Cd52,Cdkn1c,CDKN2A,CDKN2B,CENPM,CFD,CIDEC,COL4A1,COL4A2,COL4A5,COMMD3-BMI1,CREG1,CTDSPL,Cyp2d9 (includes others),CYP4F12,CYP7B1,DCT,DOK1,EGFR,EGR1,ELOVL3,FAM126A,GIPC1,HES1,Hsd3b4 (includes others),HTRA1,IGF2,IHH,IRF8,ITGA6,ITGB2,KLK3,LECT2,LMO2,LPL,LY6E,ME1,MFGE8,MME,MPEG1,Mup1 (includes others),NAT8,NGFR,NR4A1,OAT,OLIG1…	432 (22)				PNPT1		enzyme	Inhibited	-2.63	bias	3.72e-12	Apol9a/Apol9b,DTX3,GBP2,GBP4,GBP6,IFI16,IFI44,IFIT1B,IRF7,ISG15,MYC,OAS1,Oasl2,Trim30a/Trim30d,USP18,XAF1	303 (17)
NOTCH1		kinase	Inhibited	-3.466		5.6e-15	ABCB1,AIF1,APOBEC3B,ARG1,ATP6V0D2,FCGR3A/FCGR3B,GBP2,GBP4,GBP5,GBP6,GBP7,H2-L,HLA-A,ICAM1,Igtp,IL2RB,IRGM,ITGB3,NLRC5,OAS2,PIK3CD,SOX9,STAT1,TAP1,Tgtp1/Tgtp2,TLR2,Trim30a/Trim30d,ZBP1	367 (22)				IFNB1		cytokine	Activated	3.762		4.45e-12	CD83,CLSTN1,CTSK,DDX3Y,Eif2s3y,GAS1,GBP2,GBP4,GBP6,GBP7,GLIS2,HLA-A,HMGCR,IFI16,Ifi27l2a/Ifi27l2b,IFIT1B,IP6K2,IRF7,ISG15,ISG20,MCM6,MGST2,mir-21,MYC,OAS1,Oasl2,PDK4,SPP1,SQLE,STARD4,TLR7,TLR8,Tpm2,Trim30a/Trim30d,TRIM6-TRIM34,USP18,XAF1	199 (13)
ZFP36		cytokine	Activated	4.698	bias	6.57e-15	AXL,CD83,CLSTN1,CMPK2,Ctla2a/Ctla2b,DHX58,DLL1,GBP2,GBP4,GBP5,GBP6,GBP7,GLIS2,Hamp/Hamp2,HLA-A,Ifi27l2a/Ifi27l2b,IFIH1,IFIT1B,IFIT2,IFIT3,Igtp,IP6K2,IRF7,IRGM,ISG15,ISG20,ITGB3,MCM10,MCM6,MGST2,Mx1,OAS1,OAS2,Oasl2,PARP12,RNASEL,SPP1,STAT1,Tgtp1/Tgtp2,Tpm2,Trim30a/Trim30d,TRIM6-TRIM34,UBA7,USP18,XAF1,XIST,ZBP1	204 (15)				SP1		transcription regulator	Activated	3.006	bias	7.63e-12	ABHD2,ALAS2,ALPL,AR,ASNS,ATF3,CCND1,CCND2,CDKN2A,CDKN2B,CES1,CRYBB3,CTSD,CYP17A1,CYP21A2,CYP26A1,CYP2B6,Cyp2d9 (includes others),EGR1,ESR1,EZR,FGFR1,GDF15,HDC,HMGCR,HSD3B1,Hspa1b,IGF2,IGFBP1,IL2RB,KRT4,LPL,LTBP3,MYC,NDRG1,NGFR,NTRK1,PDGFRA,PDK1,PIM1,PLAU,PREX1,PRKCA,PROM1,SERPINE2,SLC19A1,SLC25A4,SOX9,SPP1,SRC,TEAD1,TGM1,TNNC1,UGT1A7 (includes others)	305 (22)
NGLY1		group	Activated	6.118	bias	1.54e-13	AFP,APOBEC3B,ATF3,AXL,CCND1,CD83,CSF2RB,DHX58,DYNLT1,EGFR,GBP2,GBP5,GBP6,GLS,H2-L,HLA-A,HLA-F,ICAM1,Ifi27,IFI44,IFIH1,IFIT1B,IFIT2,IFIT3,IL15,IRF7,IRF8,ISG15,ISG20,Mx1,NT5E,OAS1,OAS2,Oasl2,PARP12,PIM1,PSMB9,RNASEL,RTP4,SAMD9L,SERPINB1,SIGLEC1,SLC1A5,Slfn2,SP110,SPRY4,STAT1,TAP1,TGM1,Tgtp1/Tgtp2,TLR2,TRIB2,TYMP,UBA7,USP18,VCAM1,WDFY1,ZBP1	169 (13)				MLXIPL		transcription regulator	Inhibited	-2.218	bias	9.27e-12	ACACA,ACACB,ACLY,ACSS2,ELOVL6,FGF21,GCK,GPAM,HMGCR,PKLR,RGS16,SCD,THRSP,TXNIP	149 (7)
ACOX1		transcription regulator	Activated	4.934	bias	3.39e-13	APOBEC3B,CCRL2,CMPK2,DDX60,DHX58,FGF1,GBP5,Hamp/Hamp2,HLA-F,Ifi27l2a/Ifi27l2b,IFI44,IFIH1,IFIT1B,IFIT2,IFIT3,Igtp,IL15,IRF7,IRGM,ISG15,ISG20,JUNB,LCN2,Mx1,NLRC5,OAS1,OAS2,Oasl2,PARP12,PLCG2,SAMD9L,STAT1,TAP1,Trim30a/Trim30d,USP18,ZBP1	168 (14)				TP53		transcription regulator	Activated	2.593		1.88e-11	ABCA2,ACACB,ACLY,ACOT11,ACSS2,AK3,AK4,ALDH1A1,ALDH1A2,AR,ASNS,ATF3,BMF,CAMK2B,CASP6,CCND1,CCND2,CDKN2A,Ces1b/Ces1c,COL4A1,COL4A2,CTSD,CTSK,Cyb5r3,DNAJA4,DSN1,EFNA1,EGR1,ESR1,ESRRG,EZR,FDFT1,FDPS,FGFR1,FOXA2,FZD7,GADD45B,GAS1,GAS7,GDF15,GLB1,GNA14,GPD1L,GPX3,GSTP1,H19,HDC,HMGCR,HSP90AA1,HSPB1,HSPH1,IFI16,IGF2,IGF2BP2,IGFBP5,IL1RN,INHBA,INMT,IRF7,ISG15,JUNB,KLK3,LAMP3,LDHB,Ly6a (includes others),MC…	373 (22)
IKZF2		other	Activated	3.768		4.04e-13	ABCG2,ACTA1,AIF1,ALDOC,ARG1,ARRDC3,AXL,BMF,C4A/C4B,CALML4,CCND1,CCNE1,CD5L,CMPK2,CSF2RB,Ctla2a/Ctla2b,DPY19L3,EGFR,EGR1,ELN,EVL,FGFR1,GBP2,GBP4,GBP6,GDF15,GPC1,GSTP1,H19,HAP1,HES1,HSP90AA1,HSPB1,ICAM1,IFIH1,IFIT1B,IFIT2,IGF2,IGF2BP2,Igtp,IL15,INHBA,IRF7,IRGM,IRS2,ISG20,ITGA6,ITGB3,JUNB,KLK3,LBP,LDHB,LIMK1,Ly6a (includes others),MCM10,Meis1,MME,Mt1,Mx1,NAMPT,NGFR,NME1,NR1D1,NR4A2,NTF3,PAK1,PDE4B,P…	443 (20)				ZBTB20	-1.512	transcription regulator	Inhibited	-2.84		9.4e-11	ACSS2,CISH,Cyp2b13/Cyp2b9,CYP2B6,Cyp2c54 (includes others),CYP2C8,CYP2F1,CYP3A5,GCK,GPC3,IGFBP1,LDHB,LEPR,PDK4,UGT2B17	198 (7)
IRF4		transcription regulator	Activated	2.568		7.39e-13	CCND1,CCNE1,CDKN2A,CDKN2B,CIAPIN1,DDX60,DNAJA4,EGFR,ELOVL6,HLA-DMB,HSPB1,IFI44,IFIH1,IFIT3,IRF7,ISG15,ISG20,LPL,MCM6,ME1,Mx1,NDRG1,NQO1,OAS1,OAS2,PIK3C2A,PPARGC1A,PRKCA,PSMB9,STAT1,TAP1,UCP2	387 (20)				Gcg		other	Activated	2.183		1.07e-10	AGXT,APOA4,CES1,CSAD,CYP17A1,CYP2C8,GSTA5,ITIH5,LHPP,ME1,MMD2,Mup1 (includes others),OAT,Slco1a1,SULF2,Sult5a1,TFRC
mir-155		transmembrane receptor	Activated	3.9	bias	2.4e-12	Apol9a/Apol9b,ARG1,ATF3,AXL,CLIC5,CMPK2,DLL1,GBP4,HLA-A,IFI44,IFIH1,IFIT1B,IFIT2,IFIT3,IL15,IRF7,ISG15,Ly6a (includes others),Mx1,OAS1,OAS2,Oasl2,PARP12,RTP4,STAT1,TLR2,TNFAIP2,USP18,VCAM1,XAF1	269 (17)				SIRT1		transcription regulator	Inhibited	-4.668		1.28e-10	ANO1,CCND1,CCND2,CD72,CD74,CD83,CDKN2A,CDKN2B,CYP2B6,DDX60,EPDR1,ESR1,FGF21,FGFR1,GBP6,GCK,GSTA3,H2-Q8,HLA-A,HMGCR,Hsd3b4 (includes others),IFI44,IFIT1B,IRF7,LY6E,Ms4a6b,MYC,NLGN2,NR1D1,NTRK2,OAS1,Oasl2,PDGFRA,PDK4,RGS16,Scd2,SYNPO,Trim30a/Trim30d,UCP2,USP18,WNT2,ZNF618	368 (24)
miR-34a-5p (and other miRNAs w/seed GGCAGUG)		cytokine	Activated	4		4.32e-12	ABCG2,ACPP,AIF1,ALPL,APCS,APOC2,AQP4,ARG1,ATF3,BMF,CCRL2,CD83,Cdkn1c,CMPK2,CSF2RB,CYBA,CYP2B6,CYP3A5,EFNA1,EGR1,ELN,FERMT3,G0S2,GAS6,GBP2,GBP6,GDF15,H19,H2-L,Hamp/Hamp2,HES1,HLA-A,HSPB1,ICAM1,IFIT1B,IFIT3,IL15,INHBA,IRF7,IRS2,ISG15,ISG20,ITGB3,JUNB,LAMA3,LBP,LCN2,LIFR,Mt1,Mt2,NAMPT,NIBAN1,NQO1,NR1D1,NR4A1,NR4A2,NTRK1,OAS2,PDE4B,PDGFRA,PIM1,PLD1,PPARGC1A,PPP1R14A,PSMB9,PTGDS,RAC2,RGS16,SAA1,Saa3,S…	435 (20)				TGFB1		growth factor	Activated	3.63		7.01e-10	ACLY,ACPP,ADORA1,Akr1c19,APOC2,ARID5B,ASNS,BMF,C730027H18Rik,CALML4,CCND1,CCND2,CCRL2,CD72,CD83,Cdkn1c,CDKN2A,CDKN2B,COL4A1,COL4A2,CORIN,CTSD,CTSK,CYB561,CYP17A1,CYP21A2,EGR1,ELN,FBLN5,FGF21,FGFR1,FGFR2,FNDC5,FOXA1,FOXA2,GADD45B,GAS1,GAS7,GBP2,GDF15,GGT6,GLS,GNA14,GSTA5,GUCY2C,HNMT,HSD3B2,HSP90AA1,HSPB1,HTRA1,IFI16,IGF2,IGFBP5,IL1RN,IL2RB,INHBA,ITGA6,ITGA7,ITIH5,JUNB,KLK3,LCN2,LPL,LSR,LTBP3,Ly6a …	389 (24)
miR-124-3p (and other miRNAs w/seed AAGGCAC)		other	Activated	3.13		8.79e-12	AGXT,APOA4,ARG1,CES1,CTSC,CYP17A1,CYP2C8,Hamp/Hamp2,ME1,MFSD2A,MMD2,Mup1 (includes others),OAT,PDE4B,PEX11A,RARRES1,Slco1a1,SULF2,Sult5a1,VNN1					STAT1	1.182	transcription regulator	Activated	3.826	bias	7.14e-10	ABCB9,ALAS2,APOC2,CASP6,CCND1,CCND2,CCRL2,CLIC5,CYP2C8,Cyp2d9 (includes others),CYP3A5,DDX60,EGR1,GBP2,GBP4,GBP6,GCK,GLS,HTRA1,IFI16,IFI44,IFIT1B,IRF7,ISG15,LCN2,Ly6a (includes others),LY6E,MYC,OAS1,Oasl2,PF4,PIM1,RORC,SORT1,TLR8,TYMP,USP18,XAF1	254 (15)
miR-29b-3p (and other miRNAs w/seed AGCACCA)		growth factor	Activated	3.422		8.8e-12	ABCG2,ACPP,ACTA1,AFP,Akr1c19,ALDH18A1,AP3S1,APOC2,AQP11,ARG1,ARHGAP19,AXL,BMF,BMP7,C1QA,CALML4,CCND1,CCNE1,CCRL2,CD163,CD83,Cdkn1c,CDKN2A,CDKN2B,CDKN2C,CFD,CIDEC,CKM,COL4A1,COL4A2,CORIN,COTL1,CTSC,CYBA,CYP17A1,DOCK2,DOK1,EGR1,ELF4,ELN,FCGR3A/FCGR3B,FGFR1,FNDC5,FUT8,GABBR1,GAS7,GBP2,GDF15,GLS,GNA14,GUCY2C,Hamp/Hamp2,HES1,HNMT,HSD3B2,HSP90AA1,HSPB1,HTRA1,ICAM1,IFIH1,IFIT3,IGF2,IL15,IL2RB,IMPDH1,INH…	485 (24)				FZD9		G-protein coupled receptor	Activated	2.376	bias	9.79e-10	CXCL14,IFI16,Ifi202b,Ifi27l2a/Ifi27l2b,IFI44,IFIT1B,IRF7,ISG15,Oasl2
mir-29		transcription regulator	Activated	3.257	bias	8.96e-12	ABCB1,ABHD2,ACSL1,ADA,ADD3,ALAS2,ALPL,AR,ATF3,BAG2,BMP7,CCND1,CDKN2A,CDKN2B,CDKN2C,CES1,CRYBB3,CYP17A1,CYP26A1,CYP2B6,Cyp2d9 (includes others),CYP7B1,EGFR,EGR1,EZR,FGFR1,GDF15,GLTP,HDC,HSD3B1,Hspa1b,ICAM1,IGF2,IL15,IL2RB,ITGB3,KRT4,LPL,MAOA,Mt1,NDRG1,NGFR,NTRK1,PDGFC,PDGFRA,PIM1,PKM,PREX1,PRKCA,PROM1,RASGRP2,SERPINE2,SLC25A4,SOX9,SPP1,SRC,STAT1,TEAD1,TGFBR2,TGFBR3,TGM1,TLR2,UGT1A7 (includes other…	407 (16)				APP		other	Activated	3.167		2.18e-09	BMF,CALML4,CCND1,CCND2,CD74,CTSD,EGR1,ELN,ESR1,EVL,FGFR1,FZD7,GBP2,GBP4,GBP6,GDF15,GPC1,GSTP1,H19,HAP1,HMGCR,HSP90AA1,HSPB1,IFI16,IFIT1B,IGF2,IGF2BP2,IGFBP5,INHBA,IRF7,IRS2,ISG20,ITGA6,JUNB,KLK3,LBP,LDHB,Ly6a (includes others),Meis1,MYC,NAMPT,NENF,NGFR,NR1D1,NR4A2,NTF3,PAK1,Pcp4l1,PDGFRA,PDK1,PLAU,PRKCA,PTGDS,S100A8,SIRPA,SLC13A3,SLC1A2,SMARCA2,SOX9,STXBP4,TLR7,TLR8,Tpm2,TRIB3,TUBA8,USP18,VCAM1,X…	374 (19)
miR-22-3p (miRNAs w/seed AGCUGCC)		cytokine	Activated	4.411	bias	9.23e-12	ATF3,CD83,CHAC1,CMPK2,DDX60,GBP5,IFI44,IFIH1,IFIT2,IFIT3,ISG15,ISG20,MLKL,OAS1,OAS2,PSMB9,RTP4,SP110,STAT1,TLR2,USP18,XAF1	307 (19)				HTT		transcription regulator	Activated	2.206		3.55e-09	ATF3,CALML4,CAMK2B,CCND1,CD74,CD9,CDHR5,COL4A1,COL4A2,CTSD,EGR1,EVL,FDFT1,FDPS,FGF1,FGFR1,GAS7,GPC1,GPX3,GRK5,GSTA5,HAP1,HMGCR,Hspa1b,IFI16,IGF2,IGFBP5,JUNB,KCTD17,LDHB,MEIS2,Mup1 (includes others),NGFR,NR4A1,NR4A2,NTRK1,NTRK2,PCTP,PDK1,PER2,PFN2,PRKAA2,PROM1,RGS16,Scd2,SCN4B,SERPINA1,SIRPA,SLC1A2,SORT1,SPP1,SRM,TFRC,THRSP,Tpm2,VCAM1	339 (20)
mir-21	-1.321	transcription regulator	Activated	2.299		1.26e-11	ABCB9,ABCC4,ACTA1,AFP,ALDH18A1,AR,ARG1,AXL,BMPER,CCND1,CCNE1,CD9,CDKN2A,CDKN2B,CIDEC,CLDN7,CLEC3B,COL4A1,COL4A2,COMMD3-BMI1,CTDSPL,CYP26A1,EGR1,EZH1,EZR,FGFR1,FMOD,FOXF1,FUT8,GBP2,GBP4,GLS,GPC1,GPC3,H19,HES1,HLA-A,HSP90AA1,Hspa1b,HSPB1,HSPH1,ICAM1,IFI44,IFIH1,IFIT2,IFIT3,INHBA,IRF7,IRX3,ISG20,ITGA6,LDHB,Ly6a (includes others),MCM6,ME2,MKI67,Mt1,Mt2,MYLPF,NDRG1,NIBAN1,NME1,NQO1,OAS1,Oasl2,OAT,OLIG…	432 (21)				INSIG2		other	Activated	2.764	bias	8.06e-09	ACACA,ACLY,ELOVL6,FDFT1,FDPS,GPAM,HMGCR,SCD	198 (8)
miR-199a-5p (and other miRNAs w/seed CCAGUGU)		cytokine	Activated	4.09	bias	1.36e-11	ABCG2,AFP,APCS,AQP4,ARG1,ATF3,ATP2A1,BTC,CCND1,CCNE1,CD163,CD83,CDKN2A,CDKN2B,CES1,CFD,CFP,CIB2,CSF2RB,CSF3R,CTSC,CYP2B6,CYP2C8,CYP3A5,EGFR,EGR1,GBP2,H2-Q8,Hamp/Hamp2,HLA-A,ICAM1,Ifi202b,IFIT1B,IFIT2,IGF2,IL15,IL2RG,ITGB3,JUNB,KLK3,LBP,LCN2,LIFR,LPL,LY86,MKI67,MRAS,Mt1,Mt2,NAMPT,NUCB2,Orm1 (includes others),PIM1,PROM1,PSMB9,PTP4A3,PTPRC,RAB27A,SAA1,Saa3,SCNN1A,SERPINA1,SERPINA7,SLC7A7,Slco1a1,SMO…	393 (18)				TMEM173		other	Activated	2.168	bias	1.06e-08	GAS7,HAP1,HDC,HOPX,IFI16,Ifi27l2a/Ifi27l2b,IFI44,IFIT1B,IRF7,ISG15,LCN2,OAS1,RGS16,USP18	206 (16)
miR-1-3p (and other miRNAs w/seed GGAAUGU)		other	Activated	3.242	bias	5.32e-11	GAS7,GBP5,HAP1,HDC,HOPX,Ifi27l2a/Ifi27l2b,IFI44,IFIT1B,IFIT2,IFIT3,IRF7,ISG15,LCN2,Mx1,OAS1,PTPRC,RGS16,USP18	252 (17)				VDR		transcription regulator	Activated	2.894		3.56e-08	ACACA,CCND1,CCND2,CISH,COL4A1,COL4A2,CYP2B6,EGR1,IGFBP5,IL1RN,ISG15,LPL,MYC,NUPR1,PDLIM2,PLD1,PLIN2,S100A8,S100A9,SERPINA1,SLC10A2,Slco1a1,SPP1,SRC,SULT2A1,TXNIP,UCP2	355 (29)
let-7a-5p (and other miRNAs w/seed GAGGUAG)		other	Inhibited	-3.939	bias	6.22e-11	ARG1,CCND1,CCNE1,GBP5,GBP6,ICAM1,Ifi202b,IFI44,IFIH1,IFIT1B,IFIT2,IFIT3,IL15,IL2RB,IRF7,IRGM,IRS2,ISG15,ISG20,Mx1,OAS1,OAS2,Oasl2,RALGDS,STAT1,USP18,VCAM1	245 (15)				IFNAR1		transmembrane receptor	Activated	2.74	bias	4.01e-08	Apol9a/Apol9b,ATF3,CLIC5,GBP4,HLA-A,HMGCR,IFI16,IFI44,IFIT1B,IRF7,ISG15,LAMP3,Ly6a (includes others),MYC,OAS1,Oasl2,SQLE,TLR7,USP18,VCAM1,XAF1	202 (14)
DICER1		G-protein coupled receptor	Inhibited	-3.873	bias	1.49e-10	DDX60,DHX58,Ifi27l2a/Ifi27l2b,IFI44,IFIT1B,IFIT2,IFIT3,IRF7,ISG15,ISG20,OAS1,OAS2,Oasl2,STAT1,USP18	160 (7)				NFKBIA		transcription regulator	Activated	2.056		4.13e-08	CCND1,CCND2,CDH13,Cdkn1c,FZD7,GADD45B,GBP2,GPX3,GRK5,HLA-A,HOXA10,IFI16,IFIT1B,IGF2,IL1RN,IRX3,ISG15,JUNB,LCN2,LY6E,MFGE8,mir-21,MMP15,MYC,NID1,NLRP12,NR4A1,PIM1,PLAU,RASA3,RGS16,S100A8,S100A9,SERPINE2,SLC1A2,SOX9,TFRC,TNFAIP8,VCAM1	320 (18)
STK3		microRNA	Inhibited	-2.869	bias	1.92e-10	AIF1,CCND1,CDKN2A,CDKN2B,CSF3R,DHX58,EIF4E3,ELN,FGF1,FGL2,GBP2,GBP5,GBP6,GBP7,H2AX,ICAM1,INPP5D,IRGM,LEPR,MARCO,MKI67,NLRC5,NME1,OAS2,Orm1 (includes others),PER2,PILRB,SIGLEC1,Slfn2,STAT1,TAP1,TGM1,Tgtp1/Tgtp2,TLR2,TMEM97,TOP2A,TYMP,UBA7,VCAM1	327 (20)				ATP7B		transporter	Inhibited	-3.317		5.34e-08	AACS,ACLY,Cyp2c40 (includes others),ELOVL6,FDFT1,FDPS,H19,HMGCR,MSMO1,SQLE,THRSP
STAT6		other	Activated	3.917	bias	4.84e-10	ACPP,ACSL1,ALDH1A1,ALDH1A2,APCS,APOBEC3B,ARG1,CCRL2,CD83,CMPK2,EGR1,Gdap10,GDF15,HCK,HDC,HLA-A,ICAM1,IFIT1B,IFIT2,IL15,INHBA,INPP5D,IRF7,IRF8,ISG15,MARCO,MKI67,MLH1,PDE4B,SAA1,Saa3,SPP1,TLR2,USP18,VCAM1,Vnn3,ZAP70	396 (19)				IL6		cytokine	Activated	2.318		8.99e-08	AQP4,ATF3,BTC,CCND1,CD74,CD83,CDKN2A,CDKN2B,CES1,CIB2,CISH,CTSK,CYP2B6,CYP2C8,CYP3A5,DVL1,EGR1,GADD45B,GBP2,H2-Q8,HLA-A,IFI16,Ifi202b,IFIT1B,IGF2,IGFBP1,IGFBP5,IL1RN,JUNB,KLK3,LBP,LCN2,LPL,mir-21,MYC,NAMPT,Orm1 (includes others),PIM1,PLAU,PROM1,RAB27A,RORC,S100A9,SAA1,SERPINA1,SFTPB,Slco1a1,Slco1a4,SPP1,SRC,TFRC,THRSP,TLR7,TLR8,VCAM1,WEE1	315 (18)
PIK3CG		group	Activated	4.267	bias	1.19e-09	AXL,CCRL2,CD83,FGL2,GAS7,H2-Q8,HLA-A,Ifi27l2a/Ifi27l2b,IFIT2,IFIT3,IL15,IRF7,IRF8,Ly6a (includes others),LY6E,Mx1,STAT1,Tgtp1/Tgtp2,TLR2	305 (18)				ACKR2		G-protein coupled receptor	Inhibited	-2.714	bias	1.21e-07	DDX60,IFI16,Ifi27l2a/Ifi27l2b,IFI44,IFIT1B,IRF7,ISG15,ISG20,OAS1,Oasl2,USP18
SOCS1		G-protein coupled receptor	Inhibited	-2.326		1.56e-09	APOC2,ARRDC3,CMPK2,Ctla2a/Ctla2b,EGR1,GBP2,GBP4,GBP6,ICAM1,IFIH1,IFIT1B,IFIT2,IGF2BP2,Igtp,IRF7,IRGM,ISG20,Mx1,RNASEL,RTP4,SPP1,STXBP4,TBC1D4,Tgtp1/Tgtp2,USP18,XAF1	418 (22)				CASR		G-protein coupled receptor	Activated	2.111	bias	1.66e-07	CCND1,CCND2,CISH,CLDN14,COL4A1,COL4A2,CYP2B6,EGR1,IGFBP5,ISG15,LPL,NUPR1,PDLIM2,S100A8,S100A9,SERPINA1,SRC,TXNIP,UCP2	323 (23)
DTX1		group	Activated	3.565	bias	1.88e-09	CD83,CYP4A11,DHX58,HLA-A,ICAM1,Ifi202b,IFIH1,IL15,IRF7,IRF8,ISG15,ISG20,LCN2,Mx1,NTRK2,OAS2,RNASEL,SPP1,STAT1,TAP1,TLR2,TYMP,ZBP1	222 (15)				CG		complex	Activated	2.213	bias	2.75e-07	ACPP,ADH7,AR,BHMT,BLM,BTC,CCND2,CYP17A1,CYP26A1,DPT,EGR1,FAM110C,GAS1,GBP6,GPC1,HLA-A,HMGCR,HSD3B1,HSD3B2,Hsd3b4 (includes others),INHBA,IRS2,JUNB,LEPR,mir-21,MYCL,NR4A1,Oasl2,PHLDA1,PLAU,RGS2,SPP1,SULT2A1	252 (19)
PTGER4		kinase	Activated	3.992	bias	3.12e-09	ACKR3,ATF3,CCND1,CDH13,CYBA,CYP7B1,GBP2,GBP4,HES6,HLA-A,HSP90AA1,ICAM1,IFIT1B,IFIT2,ISG15,ITGB3,JUNB,LCN2,LIFR,Mt1,Mt2,NID1,RGS16,Saa3,SERPINE2,Slfn2,SMOC2,SPP1,SRC,TNFAIP2,VCAM1	379 (17)				CREB1		transcription regulator	Activated	2.459		3.3e-07	Abca8a,AK4,ATF3,BHLHE22,CCND1,CD9,CDH13,CPEB1,CYP46A1,EGR1,ESRRG,FGFR2,GADD45B,GLS,GRIA3,HLA-A,HMGCR,Ifi202b,INHBA,IRF7,IRS2,JUNB,LCN2,LPL,MCM5,MCM6,Meis1,MEST,mir-21,MSMO1,MYC,NR4A1,NR4A2,OCIAD2,PDGFRA,PER2,RFX4,RGS2,ROBO1,SCD,SERINC2,SFTPB,SLC19A1,TFRC	289 (20)
NKX2-3		transcription regulator	Activated	2.56		3.25e-09	ABCB1,ABCG2,ACOT11,ACSL1,ACSM5,ADA,ADD3,ADRB3,AFP,ALDH18A1,ALDH1A1,ALDH1A2,AR,ATF3,BMF,BOK,CAMK2B,CCND1,CCNE1,CDKN2A,Ces1b/Ces1c,CHMP4C,CKM,COL4A1,COL4A2,CORO1A,CSF3R,DNAJA4,DOK1,EFNA1,EGFR,EGR1,ELF4,ESRRG,EZR,FGFR1,FZD6,G0S2,GAS6,GAS7,GDF15,GLB1,GNA14,GPD1L,GPR157,GPX3,GSTP1,H19,H2AX,HDC,HSP90AA1,HSPB1,HSPH1,ICAM1,IGF2,IGF2BP2,IKBIP,INHBA,IRF7,IRF8,ISG15,JUNB,KLK3,LDHB,LIMK1,Ly6a (includes other…	486 (23)				NR1D1	2.174	ligand-dependent nuclear receptor	Inhibited	-2.621		3.42e-07	ACACA,ACLY,CRY1,EGR1,FGF21,ME1,NAMPT,NR1D1,NUPR1,RORC	36 (3)
SOX1		other	Activated	2.668	bias	6.34e-09	ACPP,CMPK2,FGL2,HDC,IFIT1B,IFIT2,IFIT3,IL15,INHBA,IRF7,IRGM,ISG15,ISG20,MARCO,STAT1,Trim12a,Vnn3					EGR1	1.937	transcription regulator	Activated	2.097	bias	3.8e-07	AR,ATF3,CASP6,CCND1,CCND2,Cdkn1c,CYP17A1,EGR1,GADD45B,GDF15,HMGCR,IGF2,JUNB,ME1,MYC,NDRG1,NR4A1,PF4,PLAU,SPP1,SQLE,VCAM1	331 (18)
STAT5B		cytokine	Activated	2.894	bias	6.99e-09	ABCG2,AKR1C4,BOK,CCND1,CMPK2,DHX58,DNAJA4,EGFR,EGR1,ERBB4,Hsd3b4 (includes others),IFI44,IFIH1,IFIT3,IGF2,IRF7,ISG15,LY6E,Meg3,MFGE8,MLKL,MME,NUPR1,OAS1,OAS2,PARP12,PDGFRA,PGRMC1,PIM1,SAMD9L,SCP2,SP110,SPP1,STAT1,USP18,XAF1	356 (21)				Ifnar		group	Activated	2.618	bias	5.27e-07	CD74,GBP2,H2-Q8,HLA-A,IFI16,IFIT1B,IRF7,ISG15,ISG20,OAS1,SPP1,TLR7,USP18,VCAM1,XAF1	223 (15)
HNF4A		G-protein coupled receptor	Activated	2.969	bias	8.99e-09	Ifi202b,Ifi27l2a/Ifi27l2b,IFI44,IFIT1B,IRF7,ISG15,Oasl2,SPRY4,STAT1					CHUK		kinase	Activated	3.006	bias	8.73e-07	ATF3,CCND1,CDH13,GADD45B,GBP2,GBP4,HES6,HLA-A,HSP90AA1,IFI16,IFIT1B,IL1RN,ISG15,JUNB,LCN2,MYC,NID1,PLAU,RGS16,SERPINE2,SPP1,SRC,VCAM1	291 (14)
USP18	1.797	transmembrane receptor	Inhibited	-2.556	bias	1.56e-08	ACTA1,CCND1,DLL1,ERBB4,FOXF1,IGF2,PDGFRA,SOX9,TNNI2,TNNT3,Tpm2	184 (6)				POU5F1		transcription regulator	Activated	2.661		1.4e-06	BMPER,CASP6,CCND1,CLDN7,CYP26A1,FOXA1,FOXA2,GBP4,GCK,H19,HOPX,INHBA,IRX3,LHX2,Meis1,MYC,Oasl2,ONECUT1,PDGFRA,PEG3,PHC1,PROM1,SERPINA1,SIRPA,SPP1,SRC,TEAD1,TEAD2,TGM1,USP18	283 (15)
SOCS3		transcription regulator	Activated	3.22	bias	2.6e-08	AP3M2,AQP11,AR,ARHGAP24,BMP7,CA2,CAMK2B,CCND1,CKM,EGR1,EVL,FMNL2,GIMAP1-GIMAP5,GRIA3,GRIN3B,HSD3B2,IFIT1B,IL2RB,ISG15,ITGA6,KLK3,LPL,NDRG1,NR4A1,NR4A2,PKHD1,PPARGC1A,PSMB9,RAPGEF4,RASA3,RGS2,RNASEL,RTP4,SCN4B,SERPINE2,SLC43A1,SMPD3,TLR2,TMPRSS2,TUBA8,USP18,VCAM1,XIST	377 (24)				IL5		cytokine	Activated	2.475	bias	1.77e-06	AK3,ASNS,CCND2,CCRL2,CD63,CD9,CISH,EGR1,GBP2,GBP4,GBP7,GPAM,HLX,HMGCR,HSPH1,IRF7,LCP2,MYC,NDRG1,PDK1,PIM1,Scd2,SDF2L1,SLC1A5,STK39,TMEM97,ZNF25	277 (17)
IL1RN	1.654	transcription regulator	Activated	2.194	bias	3.31e-08	ABCB1,ADH7,ADRB3,ALDH1A1,ALDH1A2,APCS,ARG1,BHMT,CCND1,CCNE1,CDKN2B,CFD,CSF3R,CTSC,CYP17A1,Cyp2d9 (includes others),DYNLT1,ENTPD2,FBLN1,Hamp/Hamp2,HDC,HLA-A,HSD3B2,HSP90AA1,ICAM1,IRS2,LBP,LCN2,LCP2,LEPR,NUPR1,Orm1 (includes others),PCTP,PDGFRA,PPARGC1A,PPP1R14A,RAC2,SAA1,Saa3,SERPINA1,SIM2,SPP1,SULT2A1,TRIB3,XIST	411 (22)				SOX3		transcription regulator	Inhibited	-2.309	bias	2.43e-06	BMPER,CYP26A1,GBP4,INHBA,IRX3,Oasl2,PDGFRA,PEG3,SOX9,TEAD1,TEAD2,USP18,ZBTB16
TREX1		other	Activated	3.944	bias	3.6e-08	ALPL,CMPK2,DHX58,IFIT1B,IFIT2,IFIT3,IRF7,ISG15,ISG20,OAS1,OAS2,Oasl2,PARP12,SPP1,STAT1,USP18	186 (13)				GATA1		transcription regulator	Activated	2.783		2.46e-06	ABCA2,ALAS2,CA1,CA2,CCND1,CCND2,CDKN2A,EGR1,ITGA6,JAZF1,JUNB,LEPR,LMO2,MCM5,Meis1,MGST2,MYC,NR4A2,PF4,PHC1,PIM1,SLC19A1,SRC,SRM,ST3GAL6,TFF3,TFRC	323 (22)
SPARC		cytokine	Activated	3.781	bias	4.36e-08	ADA,ARG1,C4A/C4B,CCND1,CD163,CD276,CD63,CD83,CDKN2B,CDKN2C,CLCF1,CLEC6A,CSF2RB,CTSC,EGR1,ELN,GDF15,HDC,HSPH1,ICAM1,IL15,INHBA,INPP5D,ITGB3,JUNB,LY75,LY9,MARCO,MCM6,MFSD2A,MKI67,MLH1,MME,NEK2,NR4A1,NR4A2,PDE4B,PIM1,PLD1,Saa3,SLC1A5,Slfn2,SPI1,SPP1,TIFA,TLR2,TOP2A,TRIB2,ZNF25	450 (20)				ELOVL5		enzyme	Activated	2.038	bias	2.64e-06	ACACA,ELOVL6,FGF21,GPAM,PDK4,PLTP,SCD,TRIB3	152 (9)
IKZF1		cytokine	Activated	5.227	bias	6.56e-08	CDKN2A,CDKN2B,CMPK2,DDX60,GBP2,GBP4,HLA-A,IFI44,IFIH1,IFIT2,IFIT3,IL2RB,IRF7,ISG15,ISG20,LY6E,NLGN2,NPDC1,NT5E,OAS1,OAS2,PARP12,SP110,STAT1,TAP1,THEMIS2,UBA7,USP18,VCAM1,XAF1,ZBP1	359 (21)				TRIM24		transcription regulator	Inhibited	-3.712	bias	4.06e-06	Apol9a/Apol9b,CA2,DDX60,GBP2,GBP4,Ifi27l2a/Ifi27l2b,IFI44,IFIT1B,IRF7,ISG15,Ly6a (includes others),OAS1,SPP1,TRIM6-TRIM34,USP18	142 (7)
APOA1		complex	Activated	3.037	bias	7.12e-08	ABCB1,ACPP,ACSL1,ADH7,AR,BHMT,BTC,CYP17A1,CYP26A1,DPT,EGR1,FAM110C,FGL2,G0S2,GBP6,GPC1,HLA-A,HSD3B1,HSD3B2,Hsd3b4 (includes others),ICAM1,IFIT3,INHBA,IRS2,ITGB3,JUNB,LEPR,MCM10,NR4A1,NUCB2,Oasl2,PFKFB3,PPP1R14A,RGS2,Saa3,SPP1,SULT2A1,TGFBR3,TNFRSF12A,UNG	411 (17)				PPARGC1B		transcription regulator	Inhibited	-2.763	bias	4.5e-06	ACACA,ACACB,CCND1,ESRRG,FDFT1,FDPS,GCK,GPAM,HMGCR,PDK4,SCD,SQLE	191 (14)
SOX3		cytokine	Activated	3.641	bias	7.65e-08	AR,CD83,DHX58,IFIH1,IFIT2,IRF7,ISG15,Mx1,OAS1,OAS2,SIGLEC1,STAT1,Tgtp1/Tgtp2,ZBP1	335 (19)				SOCS1		other	Inhibited	-2.875	bias	5.25e-06	CCND1,CCND2,CISH,GBP6,IFI16,Ifi202b,IFI44,IFIT1B,IL2RB,IRF7,IRS2,ISG15,ISG20,OAS1,Oasl2,USP18,VCAM1	213 (14)
TRIM24		other	Activated	3.162	bias	9.33e-08	DDX60,IFI44,IFIT3,ISG15,LY6E,OAS1,OAS2,RTP4,SIGLEC1,XAF1					SMAD3		transcription regulator	Activated	2.208		6.2e-06	ADORA1,APOA4,CCND1,CCND2,CDKN2A,CDKN2B,CES1,CYP21A2,EGR1,ELN,ESR1,FDFT1,FNDC5,GADD45B,GLS,JUNB,KLK3,Ly6a (includes others),mir-21,MYC,Orm1 (includes others),SFTPB,SLC25A4,SPP1	354 (21)
SIRT1		transcription regulator	Activated	3.854	bias	1.22e-07	ABCB1,ABHD2,ACTA1,AFP,ANO1,AP3M2,ARHGAP30,ATP2A1,CCND1,CCRL2,CD63,CDKN2A,CDKN2B,CFP,CKM,CLCF1,COMMD3-BMI1,COTL1,CPM,CYP26A1,DCT,DLL1,EGR1,ELOVL6,GSTP1,HLA-F,HNMT,ICAM1,INHBA,ITGA7,KIFAP3,KLK3,LAMA3,LPXN,MFGE8,Mt1,MYLPF,NAP1L3,OXCT1,PDE4B,PLS1,PSMB9,RAB27A,RAC2,RGS2,SERPINE2,SPP1,ST7,STAMBPL1,SYK,TAP1,TLR2,TNFAIP8,TNNC2,TNNI2,TNNT3,ZNF503	415 (21)				NFkB (complex)		complex	Activated	3.051	bias	6.63e-06	ATF3,CCND1,CCND2,CD74,CD83,CLCF1,Cyb5r3,CYP3A5,DTX3,EFNA1,EGR1,FGF1,GADD45B,GBP2,GDF15,GRK5,HLA-A,HSPB1,IL1RN,IRF7,ISG15,JUNB,LCN2,MFHAS1,mir-21,MYC,NAMPT,NLRP12,NR1D1,NTF3,PLAU,PLD1,RGS16,SAA1,SH3RF1,SLC1A2,SLC2A5,SPP1,STK10,TFRC,TNFAIP8,TPMT,TRIB3,VCAM1	333 (18)
PTCH1		transmembrane receptor	Activated	4.436	bias	1.24e-07	ACPP,ACTA1,APOBEC3B,ATF3,CD163,CERK,CMPK2,CYP3A5,EFNA1,FGL2,GBP2,HDC,HTRA1,ICAM1,IFIT1B,IFIT2,IFIT3,Igtp,IL15,IL2RB,INHBA,IRF7,IRF8,IRGM,ISG15,ISG20,LCN2,MARCO,Mx1,NLRP12,NR4A1,NR4A2,PAK1,RGS16,SPP1,STAT1,TLR2,Trim12a,VCAM1,Vnn3,Wfdc17	299 (16)				IFNA2		cytokine	Activated	3.616	bias	7.69e-06	CDKN2A,CDKN2B,CISH,DDX60,GBP2,GBP4,HLA-A,IFI16,IFI44,IL2RB,IRF7,ISG15,ISG20,LAMP3,LY6E,MYC,NLGN2,NPDC1,OAS1,UGT1A6,USP18,VCAM1,XAF1	260 (16)
PNPT1		cytokine	Activated	2.527		1.25e-07	ABCC4,AFP,ARG1,ATF3,ATP9A,BTC,CADM4,CCND1,CKM,CPM,CRY1,CYP3A5,EGR1,FMO5,GAS7,GBP2,GCA,Hamp/Hamp2,HLA-A,HLA-F,ICAM1,IL15,IRF7,ISG20,JUNB,LBP,LCN2,LIFR,MAOA,Mt2,NAMPT,OAS1,PDZK1IP1,PFKFB3,PPP3CC,PSMB9,RAB4A,RAP2A,SAA1,SERPINA1,SERPINB1,SLC7A8,SPP1,STAT1,TAP1,TAT,TLR2,TNFAIP2,TOP2A,TULP3,TYMP,VCAM1	371 (20)				HNF1A		transcription regulator	Inhibited	-2.52	bias	8.27e-06	Akr1c19,AKR1C4,APOM,CASC4,CCND1,CLIC5,CYP27A1,FOXA2,GBE1,GCK,GMDS,HMGCR,HNMT,HOPX,IGFBP1,IHH,LBP,LY6E,NR1D1,ONECUT1,PCSK9,PDK1,PKLR,SERPINA1,SLC10A2,Slco1a1,Slco1a4,SRC,TFRC,UCP2,UGT1A7 (includes others),UGT2A3,UGT2B17,UGT2B7,WNK4,ZBTB20	302 (20)
GAPDH		transcription regulator	Activated	3.193	bias	1.88e-07	CMPK2,COL4A1,DHX58,IFI44,IFIH1,IFIT2,IFIT3,IRF7,ISG15,ISG20,NAMPT,OAS1,OAS2,Oasl2,PARP12,SP110,STAT1	221 (19)				TLR9		transmembrane receptor	Activated	2.143	bias	8.81e-06	ATF3,CCND1,CD83,CERK,CISH,EGR1,GADD45B,IFI16,Ifi202b,IFIT1B,IRF7,ISG15,ISG20,LCN2,MYC,NAMPT,NR4A1,Oasl2,PHLDA1,S100A8,TLR7,USP18,ZAP70	218 (16)
Irgm1		transcription regulator	Activated	2.39	bias	1.95e-07	GBP6,IFIT1B,IFIT2,IFIT3,IRF7,ISG15,Mx1,OAS1,OAS2,Oasl2,RTP4,STAT1,USP18,ZBP1	260 (17)				ATF4		transcription regulator	Activated	2.691	bias	9.71e-06	ABCG5,ARHGAP24,ASNS,ATF3,CDKN2A,CHAC1,CYP27A1,FGF21,GDF15,GRB10,IGFBP5,IHH,NDRG1,NUPR1,PEG3,SLC1A5,SLC6A9,TRIB3	105 (4)
TAB1	1.65	other	Inhibited	-2.998		2e-07	ABCC4,ASIC5,CABYR,CFD,CIART,CIDEC,DAB1,HES1,LOXL4,MCM6,MID2,NDRG1,NIPAL1,PER2,SERPINA7,SOX9,TSKU,UBE2U,WNK4					Interferon alpha		group	Activated	3.322	bias	1.28e-05	ATF3,CCND1,CCND2,CD83,CISH,CYB561,GBP2,GBP6,GLS,HLA-A,IFI16,IFI44,IFIT1B,IL1RN,IRF7,ISG15,ISG20,LAMP3,mir-21,MYC,OAS1,Oasl2,PIM1,S100A9,SERPINB1,SLC1A5,TGM1,TLR7,TLR8,TYMP,USP18,VCAM1,WDFY1,ZNRF3	278 (16)
SOD1		enzyme	Activated	4.163	bias	2.22e-07	ACTA1,ALPL,CA2,CCND1,CCRL2,CFP,DDX60,GCA,IFIT2,IFIT3,ITGA6,ITGB3,LRRC25,LY6E,MYO9A,OAS1,OAS2,PAK1,PIM1,SAMD9L,SEMA6B,SIRPA,SP110,SPP1,STAT1,TAP1,TNFAIP2,UBA7,XAF1	345 (14)				IFN alpha/beta		group	Activated	2.391	bias	1.57e-05	CCRL2,CD83,CXCL14,GAS7,H2-Q8,HLA-A,IFI16,Ifi27l2a/Ifi27l2b,IRF7,Ly6a (includes others),LY6E,TLR7	225 (15)
FFAR3		cytokine	Activated	3.864	bias	2.28e-07	AIF1,ATP6V0D2,CA2,CCND1,CCNE1,CD83,DMPK,FERMT3,GRB10,HCK,ICAM1,IL15,IRF8,ITGB3,JUNB,LIMK1,NEK2,PIM1,PLD1,RALGDS,RGS16,SAA1,Saa3,SH3PXD2A,SLC7A7,Slfn2,SPP1,SRC,STAT1,TLR2,USP18,VCAM1	343 (19)				IRF7	1.583	transcription regulator	Activated	3.226	bias	1.88e-05	CCRL2,GBP4,IFI16,IFI44,IFIT1B,IRF7,ISG15,ISG20,Ly6a (includes others),NAMPT,OAS1,Oasl2,S100A8,TLR8,TNFAIP8,Trim30a/Trim30d,USP18,XAF1	208 (15)
RNY3		enzyme	Activated	2.956	bias	2.39e-07	IFI44,IFIT1B,IFIT2,IFIT3,IRF7,ISG15,Mx1,OAS1,USP18	155 (12)				Brd4		kinase	Activated	2.333	bias	2.22e-05	ALAS2,COL4A1,COL4A2,COL4A3,COL4A5,PLAU,SPON2,TLR8,WFDC2
Creb		other	Activated	3.869	bias	2.51e-07	ACSL1,APOBEC3B,CCRL2,CMPK2,EGR1,Gdap10,GDF15,ICAM1,IFIT1B,IFIT2,IFIT3,Igtp,IL15,IRF7,IRGM,ISG15,ISG20,MKI67,Mx1,PDE4B,TLR2,VCAM1	185 (13)				RNY3		other	Activated	2.646	bias	2.29e-05	DDX60,IFI44,ISG15,LAMP3,LY6E,OAS1,XAF1
PI3K (complex)		enzyme	Activated	3.781	bias	2.9e-07	ALPL,DLL1,IFI44,IFIH1,IFIT1B,IFIT2,IFIT3,IRF7,IRF8,ISG15,ISG20,Mx1,OAS1,SPP1,STAT1	186 (13)				STAT4		transcription regulator	Activated	2.016	bias	2.48e-05	FZD7,GBE1,HES6,Hspa1b,Ifi202b,IFIT1B,ISG15,ISG20,ITGA7,ITIH5,LTBP3,MLLT3,MYC,NDRG1,NXN,PDK1,PFN2,RGS16,RRAGD,SERPINB1,Trim30a/Trim30d	214 (17)
Tgf beta		other	Activated	3.162	bias	2.95e-07	AXL,CDKN2C,EMP2,GAS6,GLS,ITGB2,NDRG1,SH2D4A,TOP2A,TSPAN3					SOX1		transcription regulator	Inhibited	-2.111	bias	3.01e-05	BMPER,CYP26A1,GBP4,INHBA,IRX3,Oasl2,PDGFRA,PEG3,TEAD1,TEAD2,USP18
ERK1/2		group	Activated	3.35	bias	3.3e-07	ABCB1,ACKR3,Akr1c14,APOM,AQP4,ATF3,BAG2,BMP7,CA2,CDKN2A,CDKN2C,CLCF1,COL4A3,CRY1,Ctla2a/Ctla2b,CYP4A11,EFNA1,EGR1,ELN,EMP2,GRB10,GRK5,HDC,HES1,HOPX,ICAM1,IHH,INHBA,ISG20,ITGA6,LCN2,LY75,MGST2,MKI67,Mt2,NAMPT,NEK2,NLRP12,NR4A1,NR4A2,P2RY14,PDE7B,PLXNA2,RGS2,STK10,TGFBR2,TRIB2,VCAM1	413 (25)				IFN Beta		group	Activated	2.403	bias	3.02e-05	ATF3,CD74,CD83,HLA-A,IFI16,IFI44,IFIT1B,IL1RN,IRF7,ISG15,MYC,OAS1,PRKCA,SLC16A6,USP18,XAF1	276 (17)
P38 MAPK		enzyme	Activated	2.804	bias	3.51e-07	IFI44,IFIT2,IFIT3,IRF7,ISG15,OAS2,SP110,STAT1	119 (7)				DGAT2		enzyme	Inhibited	-2		4.05e-05	ACACA,GPAM,SCD,UCP2	147 (7)
TCR		complex	Activated	2.756	bias	3.56e-07	ACKR3,ADD3,Akr1c14,ATF3,CCND1,CCNE1,EGFR,EGR1,FGFR1,GBP2,GDF15,H19,HES1,IGF2,INHBA,JUNB,LBP,MCM6,MGST2,Mt1,Mt2,NAMPT,NR4A1,NR4A2,PDGFRA,PIM1,PLCG2,RGS2,Scd2,SLC7A7,SPI1,SYK,TNFRSF12A,TRIB3,UNC5B,VCAM1	416 (23)				NRG1		growth factor	Activated	2.343	bias	4.44e-05	AR,CCND1,CCND2,COL4A3,EGR1,EMP2,EZH1,FGF1,GLS,GPX3,GUCY2C,HMGCR,IGF2,JUNB,KLK3,MYC,NDRG1,NR4A1,NTRK1,PKLR,PLAU,SOX4,TSPAN3	332 (19)
IFN alpha/beta		cytokine	Activated	4.049	bias	3.85e-07	ALDOC,CCNE1,CCRL2,CD63,CD9,CSF2RB,CSF3R,CTSC,DENND11,EGR1,FGL2,GBP2,GBP4,GBP7,HSPH1,ICAM1,IL2RG,IRF7,LCP2,NDRG1,NEK2,PDE4B,PIM1,PKM,PTPRC,RAP1GAP,RASGRP2,Scd2,SLC1A5,ST7,STK39,TMEM97,ZNF25	348 (18)				SAV1		other	Inhibited	-2.4	bias	4.92e-05	CCND1,CDKN2A,COL4A1,GPC3,SOX4,SPP1
Pkc(s)		mature microRNA	Inhibited	-3.86	bias	5.12e-07	ACTA1,BCAM,CMPK2,COL4A1,COL4A5,ISG15,ITGB3,LCN2,RND1,SAMD9L,TGFBR2,TGFBR3,TMPRSS2,ZBP1,ZBTB16					FUT8	1.127	enzyme	Activated	2.449		4.92e-05	ELN,GAS1,GOLM1,PROM1,SQLE,TFRC
Pka		transcription regulator	Activated	3.075	bias	5.44e-07	ACTA1,AP3M2,AQP11,AR,ARHGAP24,BMF,CA2,CAMK2B,CCND1,CCNE1,CDKN2A,CDKN2B,CKM,CTSE,EGR1,EVL,FMNL2,GIMAP1-GIMAP5,HES6,IFIT1B,ITGA6,ITGB2,KLK3,LAMA3,MKI67,MME,NDRG1,NR4A1,PPARGC1A,RAPGEF4,RASA3,RNASEL,RTP4,SCN4B,SLC43A1,SMPD3,TGFBR2,TLR2,TMPRSS2,TUBA8,TXNIP,USP18,XIST	429 (26)				AMPK		complex	Activated	2.17		5.55e-05	AACS,ACACA,AR,BMF,CCND2,CYP2B6,EGR1,IL1RN,LDHB,OAT,PKLR,THRSP,UCP2,VCAM1	328 (23)
Rock		growth factor	Activated	3.255		6.45e-07	ABCG5,ADRB3,APOA4,APOM,AR,BOK,CA3,CCND1,CD63,CFD,COL4A1,CYBA,CYP17A1,Cyp2a12/Cyp2a22,CYP2C18,Cyp2c54 (includes others),CYP2C8,Cyp2d9 (includes others),CYP2F1,CYP3A5,CYP4A11,Cyp4a14,EGR1,ELOVL6,FGFR1,FMO5,HES1,ICAM1,IRS2,JUNB,LEPR,LIFR,LPL,NAMPT,PER2,PPARGC1A,Saa3,Scd2,SCP2,SPI1,SPP1,Tgtp1/Tgtp2,UCP2,VCAM1	367 (23)				THRB		ligand-dependent nuclear receptor	Inhibited	-2.702		5.58e-05	ACACA,APOM,CCND1,CCND2,CTSD,FDPS,FGF21,FGFR1,FZD7,LPL,ME1,NR4A1,NUDT7,PDK4,PROM1,PTGDS,SPP1,THRSP,WNT2,WNT5B	300 (21)
JAK1/2		transcription regulator	Inhibited	-2.444		8.95e-07	ALPL,CERK,CMPK2,DDX60,DHX58,GBP2,GCA,GDF15,HLA-F,LY6E,PARP12,PLD1,PSMB9,RTP4,SAMD9L,SERPINE2,SP110,STAT1,TAP1,TFF3,TNFAIP8L1,TYMP,UBA7,USP18,VCAM1,XAF1,ZNF704					OSM		cytokine	Activated	2.917		5.69e-05	ASNS,ATF3,BTC,CADM4,CCND1,CCND2,CISH,CRY1,CYP3A5,EGR1,FMO5,GAS7,GBP2,HLA-A,IRF7,ISG20,JUNB,LBP,LCN2,LDLRAD4,LY6D,MYC,NAMPT,OAS1,PLAU,PPP3CC,RAB4A,S100A8,S100A9,SAA1,SERPINA1,SERPINB1,SLC16A6,SPP1,TNNC1,TYMP,VCAM1	272 (17)
Vegf		group	Activated	4.165	bias	1.15e-06	ATF3,CD83,HLA-A,IFI44,IFIH1,IFIT1B,IFIT2,IFIT3,IL15,IRF7,ISG15,Mt2,Mx1,OAS1,OAS2,PRKCA,SPRY4,STAT1,USP18,XAF1,ZBP1	169 (14)				ATF2		transcription regulator	Activated	2.404	bias	7.15e-05	ASNS,ATF3,CCND1,CDKN2A,EGR1,FGF21,MEIS2,mir-21,NUPR1,PDGFRA,PLAU,VCAM1	332 (18)
PDGF BB		cytokine	Activated	2.427	bias	1.16e-06	DHX58,IFIH1,ISG15,OAS1,OAS2,STAT1	157 (9)				CGAS		enzyme	Activated	2.44	bias	8.64e-05	IFI44,IFIT1B,IRF7,ISG15,OAS1,USP18	154 (9)
NFkB (complex)		other	Activated	2.138	bias	1.21e-06	CMPK2,FGL2,HDC,IFIT1B,IFIT2,IFIT3,IL15,INHBA,IRF7,IRGM,ISG15,ISG20,STAT1,Vnn3					TLR3		transmembrane receptor	Activated	2.723	bias	8.94e-05	ATF3,CTSK,GADD45B,GBP2,GBP4,IFI16,Ifi202b,IFI44,IL1RN,IRF7,ISG15,ISG20,JUNB,LCN2,NR4A1,OAS1,Oasl2,PHLDA1,S100A8,TLR7,TSPAN33,USP18	191 (12)
LDL		kinase	Activated	2.918	bias	1.21e-06	BMF,HLA-A,HLA-F,ICAM1,IFIT2,IRF7,JUNB,Oasl2,Orm1 (includes others),PSMB9,SAA1,STAT1,TAP1,USP18	356 (18)				YAP1		transcription regulator	Activated	2.607	bias	9.42e-05	ACACA,ACLY,CCND1,CDKN2B,EGR1,FGF1,HMGCR,IGF2,INHBA,LPL,MCM6,MYC,NUPR1,POLA1,SOX9,VCAM1,WTIP	280 (20)
NCOR-LXR-Oxysterol-RXR-9 cis RA		transcription regulator	Activated	2.185	bias	1.21e-06	AR,COMMD3-BMI1,CREB3L2,DCT,GAS7,H19,IHH,KLK3,LBP,PRKCA,PTGDS,SMPD3,SOX9,VNN1	338 (16)				GMNN		transcription regulator	Inhibited	-2.111	bias	0.000101	BMPER,CYP26A1,GBP4,INHBA,IRX3,Oasl2,PDGFRA,PEG3,TEAD1,TEAD2,USP18
Interferon alpha		enzyme	Inhibited	-2.542	bias	1.3e-06	Ifi27l2a/Ifi27l2b,IFI44,IFIT1B,IFIT2,ISG15,Ly6a (includes others),USP18					MAVS		other	Activated	2.96	bias	0.000109	ALPL,IFIT1B,IRF7,ISG15,ISG20,OAS1,Oasl2,SPP1,TLR7,USP18	149 (13)
ERK		growth factor	Activated	3.418	bias	1.3e-06	ACTA1,ADD3,ATF3,BOK,CCND1,CCNE1,CDH13,CDKN2A,COL4A1,CYBA,CYP17A1,CYP4A11,Cyp4a14,EGFR,EGR1,GABBR1,GRK5,GSTP1,HES1,HSD3B1,HSD3B2,Hspa1b,HSPB1,ICAM1,IL15,ITGA7,ITGB3,LEPR,NAMPT,NDRG1,NR4A1,NR4A2,PPARGC1A,PPP1R3C,RGS2,SCNN1A,SOX4,SPP1,TGFBR2,TNFRSF12A,TXNIP,UCP2,VCAM1,WNK4	419 (22)				ZMPSTE24		peptidase	Inhibited	-2.722		0.000111	ATF3,CISH,CXCL14,GADD45B,IGFBP1,IGFBP5,RGS16,SIRPA	318 (14)
IL12 (complex)		transcription regulator	Inhibited	-2.673	bias	1.46e-06	BMPER,CYP26A1,DLL1,FOXF1,GBP4,INHBA,IRX3,Oasl2,PDGFRA,PEG3,SOX9,TEAD1,TEAD2,USP18,ZBTB16					SMAD1		transcription regulator	Activated	2.157	bias	0.00013	ALPL,CDKN2B,COL4A1,GADD45B,MYC,SOX9,SPP1,VCAM1	208 (14)
IFN Beta		transporter	Activated	3.225		1.49e-06	ALAD,ALAS2,Cyp2a12/Cyp2a22,CYP2B6,Cyp2c40 (includes others),Cyp2c54 (includes others),Cyp2d9 (includes others),Cyp3a25 (includes others),CYP3A5,CYP4A11,Cyp4f16/Cyp4f37					STK3		kinase	Inhibited	-2.219		0.000134	CCND1,GPC3,SFTPB,SOX4,SPP1	193 (7)
PAF1		transcription regulator	Activated	2.265		1.53e-06	ACKR3,ATP11A,AXL,BOK,CCND1,CDH13,Cdkn1c,CYBA,CYP7B1,GBP2,GPX3,GRK5,HES1,HLA-A,HOXA10,ICAM1,IFIT1B,IGF2,IL15,IRX3,ISG15,JUNB,LCN2,LIFR,LY6E,MFGE8,Mt1,Mt2,NID1,NLRP12,NR4A1,PIM1,RASA3,RGS16,Saa3,SERPINE2,Slfn2,SOX9,TLR2,TNFAIP2,TNFAIP8,VCAM1	406 (17)				IFNL1		cytokine	Activated	3.12	bias	0.000139	ATF3,CD83,CHAC1,DDX60,IFI44,ISG15,ISG20,LAMP3,OAS1,USP18,XAF1	187 (11)
IFNL3		other	Activated	2.5	bias	1.61e-06	CMPK2,FGL2,HDC,IFIT1B,IFIT2,IFIT3,IL15,INHBA,IRF7,IRGM,ISG15,ISG20,MARCO,STAT1,Trim12a,Vnn3	189 (7)				SOX4	2.588	transcription regulator	Activated	2.771	bias	0.000197	CD74,CHAC1,E130308A19Rik,EIF4E3,EVL,IGF2,Ly6a (includes others),LY6D,MGST2,PLEKHA1,PPIC,SERPINE2,SLC17A8,SORT1,TEAD1,TES,TMEM98
CLEC1B		transcription regulator	Activated	2.973	bias	1.66e-06	ALDOC,Ctla2a/Ctla2b,FYB1,GBE1,Gdap10,HES6,Hspa1b,Ifi202b,IFIH1,IFIT1B,IFIT2,ISG15,ISG20,ITGA7,MLLT3,Mt1,Mx1,NDRG1,NXN,PPP1R13L,RGS16,RRAGD,SELENBP1,SELPLG,SERPINB1,STAT1,Trim30a/Trim30d	331 (18)				Alpha catenin		group	Inhibited	-3.261	bias	0.000215	ELN,IGF2,IGFBP1,KLK3,MYC,PDGFRA,PLAU,RHOC,S100A8,S100A9,SAA1,STEAP2,VCAM1	289 (18)
BTNL2		kinase	Activated	2.912	bias	2.04e-06	ACTA1,CDH13,CYP7B1,GBP2,HLA-A,ICAM1,IFIT1B,IRF7,ISG15,JUNB,LCN2,LIFR,Mt1,Mt2,NID1,RGS16,Saa3,SERPINE2,Slfn2,TNFAIP2	363 (15)				ECSIT		transcription regulator	Activated	2.39	bias	0.000226	CD83,IL1RN,IRF7,JUNB,NR4A2,PIM1	219 (9)
DOCK8		transcription regulator	Activated	3.327	bias	2.22e-06	ABCB1,AFP,ALDOC,AQP4,AXL,CCND1,CDCP1,Cdkn1c,CDKN2A,CORO1A,CYP46A1,EGFR,ERBB4,ESRRG,GBE1,H2AX,Hamp/Hamp2,HES6,HSPB1,IGF2,IL15,IRS2,ITGB2,ITGB3,KIAA1217,LIFR,MB,NDRG1,NR4A1,NT5E,NTRK2,PFKFB3,PKM,PRKCA,PROM1,RAB11FIP4,SOX9,TLR2,TMEM19,TNFAIP2,VCAM1	411 (21)				NSD2		enzyme	Activated	2	bias	0.000237	CA2,CCND2,IFIT1B,IGF2BP2,IRF7,OAS1,PRKCA
LLGL2		transmembrane receptor	Activated	2.983	bias	2.61e-06	ATF3,CCND1,CD83,CERK,CPM,EGR1,Hamp/Hamp2,ICAM1,Ifi202b,IFIT1B,IFIT2,IFIT3,IRF7,ISG15,ISG20,LAIR1,LCN2,Mx1,NAMPT,NR4A1,OAS2,Oasl2,PFKFB3,Saa3,STAT1,USP18,Wfdc17,ZAP70	243 (13)				VEGFA		growth factor	Activated	2.532	bias	0.000249	AK4,CCND1,CCRL2,CD83,CDKN2A,CLDN7,EGR1,FGFR1,GRB10,HLX,IGFBP5,JUNB,ME2,MMP15,NR4A1,NR4A2,PIM1,PLAU,PRKCA,SFTPB,SLC25A17,UNC5B,VCAM1	312 (20)
IGF1R		transmembrane receptor	Activated	2.236	bias	3.07e-06	GBP4,IFI44,IFIH1,ISG15,Mx1,OAS1,OAS2,PSMB9,UBA7,USP18,XAF1	300 (16)				GLI1		transcription regulator	Activated	2.475	bias	0.000254	CCND1,CCND2,COMMD3-BMI1,EZR,FGF1,FOXA2,GPC3,GRIA3,IGF2,KLK3,MEST,NPDC1,PDGFRA,PDZRN3,PIM1,S100A9,SOX9,SPP1	305 (17)
SRC (family)		transcription regulator	Activated	2.754	bias	3.89e-06	ACTA1,ADCY7,ASB2,ATP2A1,CCNE1,CKM,COL4A1,EGFR,FNDC5,HES6,IFIT2,IGF2,IRX1,ITGA7,JUNB,MKI67,MYLPF,PPARGC1A,RAC2,SRC,STAT1,TEAD2,TGFBR3,TNNC2,TNNI2,TNNT3,TOP2A,UBA7	416 (23)				KMT2A		transcription regulator	Activated	2.724	bias	0.000309	ARSG,CDKN2A,EGR1,HOXA10,Meis1,MEIS2,MKX,MYC,PROM1,SLC16A6,ZIC1	228 (7)
ABCB6		enzyme	Activated	3.162	bias	4.38e-06	AXL,CDKN2C,COL4A3,EMP2,GAS6,GLS,ITGB2,NDRG1,TOP2A,TSPAN3					SH3TC2		other	Inhibited	-2.449	bias	0.000343	AACS,ACLY,EGR1,FDPS,HMGCR,SQLE
CGAS		enzyme	Activated	2.686	bias	5.69e-06	CCND1,EGFR,GBP2,GBP4,GBP6,GBP7,GDF15,H19,HES1,ICAM1,Igtp,IRGM,KLK3,RAPGEF4,STAT1,Tgtp1/Tgtp2,TMPRSS2,VCAM1	371 (18)				SFRP1		transmembrane receptor	Activated	2.121		0.00036	ACACA,ACLY,CCND1,ELOVL6,MYC,NAMPT,SCD,SOX9	312 (20)
USP22		kinase	Activated	3	bias	5.77e-06	AXL,CDKN2C,EMP2,GAS6,GLS,ITGB2,NDRG1,TOP2A,TSPAN3	76 (4)				TBK1		kinase	Inhibited	-2.059	bias	0.000371	HDC,Ifi202b,IFI44,IFIT1B,INHBA,IRF7,ISG15,ISG20,MARCO,OAS1,Oasl2	146 (13)
NSUN6		transcription regulator	Activated	2	bias	5.85e-06	C1QA,CD5L,CFP,CLEC6A,CSF3R,CTSC,CTSE,GDF15,ITGB2,LCN2,Ly6a (includes others),LY9,MARCO,MPEG1,TNFAIP2	223 (7)				IL1RN	1.94	cytokine	Inhibited	-2.871	bias	0.000405	ATF3,CHAC1,CYP3A5,IFI44,IGFBP5,IRF7,ISG20,LAMP3,NTRK1,OAS1,S100A9,SPP1,USP18	247 (18)
DDX58		transcription regulator	Activated	3.869	bias	7.48e-06	ABCB1,ABCG2,AFP,AR,CCND1,CDKN2A,CYP17A1,CYP2B6,EGR1,ELN,GDF15,GRK5,HES1,ICAM1,IFIT1B,IRF7,ISG15,JUNB,Mx1,NAMPT,NR4A1,NR4A2,OAS2,PDE4B,PKM,PLD1,PSMB9,PTGDS,SAA1,Saa3,SERPINE2,SLC2A5,SMOC2,SOX9,SPI1,TAP1,TLR2,TNFAIP2,TPMT,VCAM1	419 (19)				MACROH2A1		other	Inhibited	-2.138		0.000411	CCND2,CDKN2B,EGR1,FGF1,GCK,IRF7,KRT23,LPL,PLAU,THRSP	196 (9)
MAVS		enzyme	Activated	2.173		8.31e-06	ACTA1,AR,CFD,COL4A1,CSF3R,CTSC,GSPT2,H19,H2-T10,IFIT1B,IFIT3,IRS2,ISG15,KRT4,LCN2,MB,Orm1 (includes others),PPARGC1A,Saa3,SLC1A5,Slfn2,Tgtp1/Tgtp2,TNNT3	385 (22)				SPDEF		transcription regulator	Inhibited	-2.611	bias	0.00043	CLDN7,COL4A1,COL4A2,COL4A5,FGFR1,ITGA6,KLK3,PLAU,PRKCA	152 (7)
TMEM173		cytokine	Activated	4.264	bias	8.48e-06	ARG1,CCRL2,CLIC5,CMPK2,EGR1,FGL2,GBP5,GBP6,IFIT1B,IFIT2,IFIT3,Igtp,IL2RB,IRF7,ISG15,MKI67,OAS2,PSMB9,PTPRC,TAP1,Tgtp1/Tgtp2,USP18	338 (19)				S100A4		other	Activated	2.412	bias	0.00045	EFNA1,PF4,PLAU,S100A8,S100A9,SAA1,VCAM1	289 (18)
NSD2		cytokine	Activated	2.994	bias	8.96e-06	ARG1,CCND1,CCNE1,CD163,CPM,CYP17A1,EGR1,FCGR3A/FCGR3B,FERMT3,GDF15,GLS,IRF7,IRF8,ITGB3,JUNB,MARCO,PFKFB3,PKM,PTPRC,SIGLEC1,SLC1A5,SPI1,STAT1,TLR2,VCAM1	370 (23)				FASN		enzyme	Inhibited	-2.36		0.00048	ACACA,ACLY,ELOVL6,FGF1,GPAM,LPL,PKLR,SCD,ZIC1	285 (18)
TLR7	1.416	kinase	Activated	2.486		8.96e-06	ACTA1,AXL,CCND1,CDKN2C,EGFR,EGR1,EMP2,EZR,GAS6,GLS,IGF2,ITGB2,NDRG1,NID1,TNNT3,TOP2A,TSPAN3	449 (22)				DBI		other	Inhibited	-2		0.000501	ACSS2,ELOVL6,HMGCR,SQLE	163 (5)
ROR1		complex	Activated	4.742	bias	1.11e-05	ABCB1,ACKR3,ANXA13,ATF3,BAG2,CCND1,CD83,CLCF1,CYP3A5,DTX3,EFNA1,EGFR,EGR1,FGF1,FOXF1,G0S2,GAS6,GBP2,GDF15,GRK5,HLA-A,HLA-DMB,HLA-F,HSPB1,ICAM1,IL15,IRF7,ISG15,JUNB,LCN2,NAMPT,NLRP12,NR1D1,NTF3,PLD1,PSMB9,RGS16,SAA1,Saa3,SELPLG,SH3RF1,SLC2A5,SPP1,STK10,TAP1,TLR2,TNFAIP2,TNFAIP8,TPMT,TRIB3,VCAM1,Wfdc17	423 (16)				TRIM21		enzyme	Inhibited	-2.197	bias	0.000545	IRF7,MYC,Trim12a,Trim30a/Trim30d,TRIM6-TRIM34	79 (5)
Ifn		cytokine	Inhibited	-2.748	bias	1.12e-05	ATF3,CHAC1,CYP3A5,ICAM1,IFI44,IFIH1,IFIT3,IRF7,ISG20,LIFR,NTRK1,OAS1,OAS2,RARRES1,RTP4,SPP1,THEMIS2,USP18	370 (20)				LGR5		transmembrane receptor	Activated	2.236	bias	0.000545	LHPP,OAT,RDH16,SLC13A3,SLC1A2
IFN type 1		transcription regulator	Activated	3.23	bias	1.12e-05	ACPP,CCNE1,CD83,CMPK2,FGL2,GBP4,IFIT1B,IFIT2,IFIT3,IL15,INHBA,IRF7,IRGM,ISG15,ISG20,NGFR,NR4A1,PLD1,PPARGC1A,PTPRS,RGS2,SRC,STAT1,TLR2	393 (20)				DDX58		enzyme	Activated	2.393	bias	0.000594	ALPL,IFI44,IFIT1B,IRF7,ISG15,ISG20,LTBP3,OAS1,SPP1	140 (13)
MAC		transmembrane receptor	Activated	3.868	bias	1.18e-05	ATF3,CMPK2,CPM,DHX58,GBP2,GBP4,Hamp/Hamp2,ICAM1,Ifi202b,IFI44,IFIH1,IFIT2,IFIT3,IL15,IRF7,ISG15,ISG20,JUNB,LCN2,Mx1,NR4A1,OAS1,Oasl2,PFKFB3,PIK3CD,Saa3,STAT1,USP18	186 (12)				NFATC2		transcription regulator	Activated	2.5		0.000643	ACPP,CD83,CISH,GBP4,IFIT1B,INHBA,IRF7,ISG15,ISG20,MYC,NGFR,NR4A1,PLD1,PTPRS,RGS2,RORC,SRC	305 (17)
Ifnar		transcription regulator	Activated	2.366		1.25e-05	ACTA1,ALDOC,ATF3,ATP8A1,CALML4,CAMK2B,CCND1,CD9,CKM,COL4A1,COL4A2,COX6B2,DLL1,EGR1,EVL,FGF1,FGFR1,GAS7,GPC1,GPX3,GRK5,Hamp/Hamp2,HAP1,Hspa1b,IGF2,IL15,JUNB,LDHB,MPEG1,Mt1,Mup1 (includes others),NGFR,NR4A1,NR4A2,NTRK1,NTRK2,PCTP,PDE4B,PER2,PPARGC1A,PROM1,PSMB9,RAP1GAP,RASGRP2,RGS16,Scd2,SCN4B,SERPINA1,SIRPA,SPP1,SRM,ST3GAL2,TNNI2,TNNT3,Tpm2,VCAM1	459 (26)				SCD	-1.749	enzyme	Inhibited	-2.207		0.000672	ACACA,ACACB,ATF3,GPAM,IFIT1B,LPL,Scd2,UCP2	344 (23)
CG		transcription regulator	Inhibited	-2.887	bias	1.31e-05	BMPER,CYP26A1,FOXF1,GBP4,HES1,INHBA,IRX3,Oasl2,PDGFRA,PEG3,TEAD1,TEAD2,USP18					NOS2		enzyme	Activated	2.042		0.000701	AR,COL4A1,GSPT2,H19,H2-T10,IFIT1B,IL1RN,IRS2,ISG15,KRT4,LCN2,MCM5,Orm1 (includes others),S100A8,SLC1A5,TNNC1	315 (21)
FZD9		other	Inhibited	-2.53	bias	1.74e-05	Ifi27l2a/Ifi27l2b,IFIT1B,IFIT2,IFIT3,IRF7,MKI67,NEK2,NUPR1,OAS2,USP18	256 (10)				IKBKB		kinase	Activated	2.959	bias	0.000768	ATF3,CCND1,CDH13,CTSK,EGR1,GBP2,GRK5,HLA-A,IFI16,IFIT1B,IL1RN,ISG15,JUNB,LCN2,MYC,NID1,PLAU,RGS16,SERPINE2,Tpm2,VCAM1	294 (15)
PRKCE		growth factor	Activated	3.538	bias	1.8e-05	AR,AXL,CCND1,CCNE1,CDKN2C,COL4A3,EGR1,EMP2,EZH1,FGF1,GAS6,GLS,GPX3,GUCY2C,HES1,IGF2,ITGB2,ITGB3,JUNB,KLK3,LIFR,NDRG1,NR4A1,NTRK1,SH2D4A,SOX4,TOP2A,TSPAN3	387 (20)				IKBKG		kinase	Activated	2.933	bias	0.000771	CDH13,GBP2,HLA-A,IFI16,IFIT1B,IL1RN,IRF7,ISG15,JUNB,LCN2,NID1,RGS16,SERPINE2	290 (15)
STAT1	1.673	transcription regulator	Activated	4.041	bias	1.87e-05	CCND1,CMPK2,FGL2,GBP2,H2-L,IFI44,IFIH1,IFIT2,IFIT3,IL15,IRF7,ISG15,MAP4K4,OAS1,OAS2,PSMB9,SP110,SPI1,STAT1,TAP1,VCAM1,XAF1	324 (19)				TCL1A		transcription regulator	Activated	2.236	bias	0.000792	CTSD,CTSE,GDF15,LCN2,Ly6a (includes others),LY9,MARCO,S100A8,S100A9,TLR7	178 (7)
BAK1		cytokine	Activated	3.093	bias	2.14e-05	AP1S3,CCRL2,GBP2,GBP5,IFIH1,IFIT2,ISG15,Ly6a (includes others),USP18,ZBP1	324 (19)				ADIPOQ		other	Inhibited	-2.64		0.000848	ACACA,ACACB,ACLY,CASP6,CCND1,CDKN2A,EGR1,GCK,LEPR,LPL,mir-21,PRKAA2,SCD,UCP2,VCAM1	324 (23)
CSF1		kinase	Activated	4.067	bias	2.23e-05	AFP,ATF3,CCND1,CDH13,CYBA,CYP7B1,EGR1,GBP2,GRK5,H2AX,HLA-A,ICAM1,IFIT1B,ISG15,ITGB3,JUNB,LCN2,LIFR,Mt1,Mt2,NID1,RGS16,Saa3,SERPINE2,Slfn2,TGFBR2,TNFAIP2,Tpm2,VCAM1	338 (16)				CYP7A1		enzyme	Inhibited	-2.219		0.000853	ABCG5,ACACA,FDFT1,FDPS,HMGCR	113 (9)
PRL		kinase	Activated	2.073		2.89e-05	AR,CCND1,CCNE1,CYP17A1,EFNA1,EGFR,Hamp/Hamp2,HSPB1,IGF2,IL2RB,IP6K2,IRF8,IRS2,KLK3,LDHB,MB,OAS1,PGRMC1,PKM,PPARGC1A,PYGB,RAB4A,SERPINA1,SERPINB1,SGCB,SOX4,SRC,STAT1,TMPRSS2,TXNIP,UGT2B17,VCAM1,ZAP70	459 (21)				PIK3CG		kinase	Inhibited	-2.547		0.000866	CD74,CTSK,GBP2,GBP4,GBP6,GBP7,HLA-A,IL2RB,SOX9,TLR8,Trim30a/Trim30d	177 (7)
NR4A3		growth factor	Activated	2.334	bias	3.33e-05	ABCG2,ACKR3,AFP,ATF3,BAG2,CCND1,CDKN2A,CDKN2B,CDKN2C,CLCF1,COL4A1,CRY1,CYP17A1,CYP2B6,EGR1,EMP2,GRB10,GRK5,HES1,ICAM1,INHBA,IRF8,ISG15,ISG20,ITGA6,LCN2,LY75,MKI67,NAMPT,NEK2,NR4A1,NR4A2,PIM1,PLXNA2,RGS2,SPP1,STK10,TGFBR2,TMEM97,TNFAIP2,TRIB2,VCAM1	423 (19)				PRKCA	1.589	kinase	Activated	2.073		0.000892	APOM,CCND1,EGR1,GDF15,IGF2BP3,LPL,mir-21,MYC,PLD1,S100A8,S100A9,VCAM1	214 (17)
WNT1		transcription regulator	Activated	3.195	bias	3.62e-05	ABCC4,AR,ARHGAP24,ARHGEF6,CUX2,DOCK10,DOCK2,FMNL2,ICAM1,ITGA6,KLK3,NDRG1,NR4A2,PHACTR2,PIM1,RCAN2,SOX4,SOX9,SPP1,TGFBR2,TMPRSS2,TSC22D3,ZBTB16	333 (12)				RUNX2		transcription regulator	Activated	2.131		0.000958	ALPL,CCND1,CDHR5,FGFR2,GADD45B,HTRA1,IHH,OLIG1,PLAU,PTGDS,SOX9,SPP1	338 (22)
AGT		transcription regulator	Activated	3.081		3.93e-05	CCND1,Cdkn1c,CMPK2,CSF2RB,CSF3R,CTSE,HES1,IFI44,IFIT1B,IFIT2,IFIT3,IRF7,ISG15,ISG20,ITGB2,KLK3,LMO2,LY6E,MME,PARP12,PSMB9,PTPRC,SP110,SPI1,SPP1,TLR2,USP18	369 (23)
STAT4		other	Activated	2.449	bias	4.91e-05	ACTA1,ATP2A1,CSF2RB,Mup1 (includes others),TNNC2,TNNI2,TNNT3,Tpm2
GDF2		kinase	Activated	2.449	bias	5.26e-05	IFIH1,IFIT1B,IFIT2,IRF7,ISG20,OAS2	157 (10)
JAK1		cytokine	Activated	3.423	bias	5.74e-05	AFP,AIF1,AXL,CA2,CCND1,CD9,CYP2C18,CYP3A5,DMPK,EGFR,EGR1,ICAM1,ITGB3,JUNB,LCP2,Ly6a (includes others),NR4A1,RANGAP1,RHOC,SELPLG,SORBS3,ZBTB16	436 (22)
MAP2K1		group	Activated	2.386	bias	7.16e-05	BHMT,CCND1,CDC42EP5,CYP17A1,CYP46A1,EGR1,EZR,GRK5,H19,HLA-A,ICAM1,IRS2,ITGB3,JUNB,LEPR,NAMPT,PDGFRA,PKM,PSMB9,RHOC,Saa3,SLC12A6,SOX9,SPP1,SPRY4,TAP1,TYMP,VCAM1,VNN1	402 (20)
IL27		transcription regulator	Activated	2.112		7.62e-05	APOA4,APOC2,BMPER,CTSC,CYP2B6,CYP3A5,DPT,EGFR,FBLN1,FNDC5,GAS6,GDF15,HSD3B2,INHBA,IRS2,LDHB,LIFR,LPL,MB,MCM6,ME1,OXCT1,PODN,PPARGC1A,Saa3,SERPINA7,SERPINE2,SULT2A1,TGFBR3,TNFRSF12A,TRIB3,UCP2	419 (24)
TLR4		group	Inhibited	-2.065	bias	7.63e-05	A1BG,ALDOC,APOA4,EFNA1,Hamp/Hamp2,IKBIP,LCN2,Mup1 (includes others),Orm1 (includes others),PEX11A,PPP1R3E,PPP1R3G,RAB11FIP5,RRAGD,SAA1,SELENBP1,SERPINA7,SOX9,WWTR1
GPER1		transcription regulator	Activated	2.031	bias	7.8e-05	CCND1,CDKN2B,EGFR,EGR1,FGF1,ICAM1,IGF2,INHBA,ITGB2,LIFR,LPL,MCM6,NEK2,NUPR1,RASSF4,SOX9,TOP2A,VCAM1,WTIP,WWTR1	359 (19)
HIF1A		ligand-dependent nuclear receptor	Activated	3.216		8.11e-05	AQP4,ARG1,EGR1,GPX3,ICAM1,INHBA,JUNB,LCN2,NR4A2,NTF3,PLIN4,RAPGEF4,RGS2,SCNN1A,TNNT3,TSC22D3,TSPYL4	438 (19)
IL5		transcription regulator	Activated	2.886		8.23e-05	ABCC4,ALAS2,CA2,CCND1,CDKN2A,CDKN2C,CREG1,EGR1,FYB1,IRF8,ITGA6,ITGB3,JAZF1,JUNB,LEPR,LMO2,Meis1,MGST2,NR4A2,PHC1,PIM1,PLXNA2,SRC,SRM,ST3GAL6,TFF3,TOP2A,UNG	307 (11)
RORA		kinase	Activated	2.96	bias	8.67e-05	BMP7,CCND1,CDKN2A,EGR1,GBP2,ICAM1,LCN2,LMO2,LY6E,NR4A1,PSMB9,Rps4l,Saa3,SEMA6B,STAT1,TAP1,TRIB2,XIST	328 (19)
IKBKB		enzyme	Activated	2.75	bias	9.15e-05	EGR1,IRF7,ISG15,Ly6a (includes others),Mx1,OAS1,OAS2,SIGLEC1,USP18	149 (12)
IFNAR1		transcription regulator	Activated	2.695	bias	9.56e-05	CCND1,CDKN2A,CSF3R,HSD3B1,ICAM1,IL2RB,ISG15,LPL,Mx1,OAS1,PIM1,VCAM1	413 (24)
MTOR		complex	Activated	2.684	bias	0.000103	CD63,Ctla2a/Ctla2b,ICAM1,Ifi202b,IFIH1,IFIT1B,IFIT2,IL15,IRF8,ISG15,ISG20,ITGA6,ITGB2,Ly6a (includes others),MARCO,Mx1,PIM1,SELPLG,TGFBR2,Tgtp1/Tgtp2,TLR2,Trim30a/Trim30d	283 (15)
GLI1		transcription regulator	Activated	2.209	bias	0.000107	ABCB1,ADH7,AFP,APOM,AR,ARG1,ATF3,AXL,BCL9,CA3,CCND1,CDKN2A,CFD,CFP,CYP17A1,EGFR,EHD4,EZR,GAS6,GSTP1,HES1,ICAM1,IRS2,JUNB,LBP,MYLPF,NQO1,NR4A1,PTGDS,PXDN,SAA1,SLC10A2,SPP1,STAT1,SULF2,SULT2A1,SYK,VCAM1,ZNF385A	379 (22)
ARHGAP31		transcription regulator	Activated	2.587	bias	0.000111	ABCG2,CCND1,CEP70,CMPK2,COMMD3-BMI1,EZR,FGF1,FUCA2,GPC3,GRIA3,IGF2,KLK3,MEST,MLH1,NPDC1,PDGFRA,PDZRN3,PIM1,RAP2A,RNASEL,SOX9,SPP1	251 (7)
VEGFA		transcription regulator	Activated	2.339	bias	0.000115	ALDH1A1,ALPL,ARG1,BMPER,CCND1,CDKN2B,CLDN7,CYP26A1,DLL1,FOXF1,GBP4,HES1,HSPB1,INHBA,IRX3,Oasl2,PDGFRA,PEG3,PPL,PROM1,SERPINA1,TEAD1,TEAD2,TGM1,USP18,VCAM1	352 (12)
IFNK		complex	Inhibited	-2.819		0.000133	ACSL1,AIF1,ALAS2,CCNE1,CD83,CFP,COX6B2,CSF2RB,EGR1,FCGR3A/FCGR3B,GAS7,GBE1,HCK,ICAM1,IFIT1B,IFIT2,IFIT3,IL2RB,IL2RG,INHBA,IRF7,LCN2,LRRC32,Ly6a (includes others),MKI67,Mx1,NAMPT,NR4A1,NT5E,OAS2,PPARGC1A,RGS16,RGS2,SCP2,SIRPA,SMOX,SPI1,SPP1,TGFBR3,TLR2,TYMP,VCAM1,ZBTB16	357 (21)
CHUK		growth factor	Activated	2.933	bias	0.000138	ACSL1,ADRB3,CCND1,CCNE1,CCRL2,CD83,CDKN2A,CLDN7,DLL1,EGR1,FGFR1,GRB10,HES1,ICAM1,INPP5D,ITGB3,JUNB,ME2,MKI67,NME1,NR4A1,NR4A2,PIM1,PPARGC1A,PRKCA,SLC12A6,UNC5B,VCAM1	410 (23)
SP1		growth factor	Activated	2.141	bias	0.000142	ABCG2,Cdkn1c,EGFR,FMOD,Hamp/Hamp2,HTRA1,ICAM1,NGFR,NTF3,NTRK1,SERPINE2,SPP1,VCAM1	81 (5)
LEP		enzyme	Inhibited	-2.418	bias	0.000147	ATF3,LPL,Mt1,Mt2,PPARGC1A,Scd2	266 (12)
SPI1	1.542	complex	Activated	2.54	bias	0.000157	APOBEC3B,ATF3,AXL,CAMK2B,CCND1,CDKN2A,CYP2C8,EGR1,G0S2,GAS6,ICAM1,IFIT2,IRF7,ITGB3,MKI67,MLH1,NAMPT,NME1,NR4A1,NR4A2,SIGLEC1,TGFBR2,TGFBR3,VCAM1,VNN1	379 (23)
GATA4		kinase	Activated	2.333	bias	0.000157	ALAS2,APCS,COL4A1,COL4A2,COL4A3,COL4A5,P2RY4,SPON2,WFDC2
ROCK1		phosphatase	Inhibited	-2.433	bias	0.000178	ACTA1,ARG1,ATF3,CCND1,EGR1,ICAM1,IFIT2,IRS2,ISG20,OAS1,OAS2,PPARGC1A,TFF3	420 (19)
CAMK4		enzyme	Activated	2.449	bias	0.000182	CA2,IFIT1B,IGF2BP2,IRF7,Mx1,OAS1,PRKCA,STAT1
PRKCA	1.8	cytokine	Activated	2.401	bias	0.000186	IL15,ISG20,Mx1,RNASEL,STAT1,TLR2,USP18	266 (16)
F3		other	Inhibited	-2.4	bias	0.000199	CCND1,CDKN2A,COL4A1,GPC3,SOX4,SPP1	25 (3)
STAT2		ligand-dependent nuclear receptor	Activated	2.143		0.000204	CCNE1,CDKN2A,CDKN2B,CYP26A1,EGFR,EGR1,EZR,HOXA10,ICAM1,KLK3,Meis1,SPP1,STAT1,TGM1,UBA7,USP18	416 (21)
JUN		transcription regulator	Inhibited	-2.887	bias	0.000226	BMPER,CYP26A1,FOXF1,GBP4,INHBA,IRX3,Oasl2,PDGFRA,PEG3,TEAD1,TEAD2,USP18
CREB1		transcription regulator	Activated	2.554	bias	0.00025	ABCG2,ABCG5,ARHGAP24,ATF3,CDKN2A,CHAC1,CYP27A1,GDF15,GRB10,IHH,NDRG1,NUPR1,PEG3,SLC1A4,SLC1A5,SLC6A9,TNFRSF12A,TRIB3
CEBPB		transcription regulator	Activated	2.153	bias	0.00025	ABHD17B,ACSL1,AKR1C4,ALDH1A2,APLP1,CCND1,CDKN2A,CREB3L2,CYP2C8,DOCK10,EGFR,EVI2B,FMNL2,GLTP,IRS2,MAP4K4,ME1,PLEKHB1,PPARGC1A,PPP1R14A,PTPDC1,RALGDS,RAP2A,SORBS3,SPP1,STK39,TSPAN15,TXNDC16,UTP14C	258 (11)
PARP1		kinase	Activated	2.739	bias	0.000275	ACTA1,APOM,CCND1,CCNE1,EGR1,GDF15,HES1,ICAM1,IFIT3,IGF2BP3,LPL,MYLPF,NQO1,PLD1,VCAM1	374 (23)
POU5F1		transcription regulator	Activated	2.594	bias	0.000291	CA3,Cdkn1c,ITGA6,ITGB3,Ly6a (includes others),PBX1,SOX9
SAMSN1		kinase	Activated	2.13	bias	0.000294	ABCB1,ATF3,CCND1,CDKN2A,CDKN2B,CKM,CYP17A1,CYP46A1,HDC,ITGB3,PDGFRA,PIM1,RAP1GAP,RAP2B,RRAGD,SERPINA1,SERPINE2,SIRPA,SOX9,UNC5B	401 (22)
ETV1		kinase	Activated	2.256	bias	0.000302	ARG1,ATF3,CCND1,EGR1,GABBR1,Hspa1b,IRS2,ISG15,ISG20,OAS1,PARP12,STAT1,USP18	269 (16)
CX3CR1		kinase	Activated	2.72	bias	0.000317	AR,CCND1,ICAM1,IRF7,ISG15,MKI67,PDGFRA,PIK3CD,PKM,TRIB3,TXNIP,VCAM1	393 (22)
IFNL1		transcription regulator	Activated	2.171	bias	0.000338	ADA,ATF3,CA2,CCNE1,CDKN2A,CDKN2B,CDKN2C,CERK,CKM,CREB3L2,CTRB2,CTSE,DAB2IP,H2AX,Ifi27,LMO2,Ly6a (includes others),MKI67,NEK2,NTRK2,PLCG2,RASGRP2,RASSF4,RGS16,SAMD9L,SERPINB1,TOP2A,TOX,ZBP1	278 (18)
IL21		kinase	Inhibited	-2.236		0.000437	CCND1,GPC3,SOX4,SPP1,WWTR1	358 (15)
H2AB3 (includes others)		cytokine	Activated	2.828	bias	0.000445	CD83,IFIH1,IFIT2,ISG15,ISG20,STAT1,USP18,ZBP1	169 (10)
CXCL12		transcription regulator	Inhibited	-2.326		0.000482	ASB2,CCND1,CCNE1,Cdkn1c,CFD,CKM,CSF2RB,DLL1,EGFR,GLS,HES1,HSPH1,ICAM1,IRF8,ITGA6,Ly6a (includes others),NGFR,OAT,PTGDS,SPI1,SPP1,TFF3,TGFBR2,TGFBR3	426 (22)
APP		transmembrane receptor	Activated	2.187	bias	0.000488	ABCC4,ACSL1,ACTA1,AQP4,CD5L,COL4A1,COL4A2,EGR1,GRB10,H19,HTRA1,IGF2,INHBA,IRS2,LPL,Meg3,mir-290,NME1,NR4A1,PDLIM2,PKM,PROM1,Scd2,SCP2,Tpm2	442 (25)
NRG1		kinase	Activated	2.17	bias	0.000508	ABCB1,CCND1,CCNE1,EGFR,EGR1,IL2RB,IL2RG,JUNB,PIM1,RGS2,VCAM1	355 (22)
EGFR	-1.519	transcription regulator	Activated	2.06	bias	0.000528	ABCB1,AR,ATF3,CCND1,Cdkn1c,CYP17A1,EGFR,EGR1,GDF15,ICAM1,IGF2,JUNB,ME1,NDRG1,NR4A1,PDGFC,SPP1,TGFBR2,VCAM1	446 (22)
ADORA2A		cytokine	Activated	3.487	bias	0.00062	ATF3,AXL,CA2,CD63,CD83,CFP,CTSC,EGFR,EGR1,G0S2,HDDC2,HSP90AA1,ICAM1,IFI44,IFIT2,IFIT3,IL15,IL2RB,INHBA,ISG15,JUNB,NAMPT,PIM1,PSMB9,RGS2,SELPLG,STAT1,TAP1,TNFAIP2,TYMP,VCAM1,ZAP70	399 (19)
CSF2		mature microRNA	Inhibited	-3.226	bias	0.000638	ATF3,AXL,CCND1,DENND1C,DLL1,FAM110C,ICAM1,IKBIP,ITGB3,MCM10,PPM1H,SAMD9L,SELPLG,SLC22A17,TRAM2
CD40LG		enzyme	Inhibited	-2.57		0.00064	Ifi27l2a/Ifi27l2b,IFI44,IFIT1B,IFIT2,IFIT3,OAS1,USP18
ZBTB48		enzyme	Inhibited	-2.236	bias	0.000697	ALDOC,C1QA,CCND1,CYP2F1,EZR,FGFR1,GPX3,GSTP1,HSPB1,ICAM1,IL15,INHBA,JUNB,LIMK1,LPL,Mt1,Mt2,PRRX1,PTGR1,SLC17A8,SPP1,TGFBR2,VCAM1	427 (25)
IL17A		growth factor	Inhibited	-2.449		0.000701	CCND1,GPC3,IL15,IRF8,SOX4,SPP1	377 (19)
IFNAR2		other	Activated	2.611	bias	0.000714	C1QA,CYBA,Hamp/Hamp2,IL2RB,IL2RG,LY86,SPI1,TLR2
TNF		transcription regulator	Activated	2	bias	0.000714	ALPL,CDKN2B,COL4A1,Hamp/Hamp2,ICAM1,SOX9,SPP1,VCAM1	326 (14)
PPARGC1A	1.53	enzyme	Inhibited	-2.611	bias	0.000765	IFIT2,KLK3,OAS1,OAS2,SPP1,STAT1,TXNIP	190 (11)
KLF4		transcription regulator	Activated	2.887	bias	0.000776	APOA4,CCND1,CCNE1,CDKN2A,CDKN2B,CES1,CKM,EGR1,ELN,FNDC5,GLS,Hamp/Hamp2,IL15,INPP5D,JUNB,KLK3,Ly6a (includes others),Orm1 (includes others),PPARGC1A,PTP4A3,SLC25A4,SLC51B,SPP1	480 (28)
TGM2		complex	Activated	2.677	bias	0.000901	APOA4,CCND1,CCNE1,COMMD3-BMI1,DHX58,EGR1,GBP4,GRIA3,IFI44,IFIH1,IFIT2,IFIT3,IRF7,ISG15,ISG20,JUNB,LCP2,LDHB,NME1,NR4A1,OAS1,PIK3CD,PIM1,PTPRC,SLC1A5,SPP1,STAT1,TNFRSF12A,TSC22D3,ZAP70	323 (19)

## Sheet: S4F Table_All sex_responsive
S4F Table_All sex_responsive
Sex-biased responsive genes in MDKO												Sex-biased responsive genes in FDKO
Upstream Regulator	Expr Fold Change	Molecule Type	Predicted Activation State	Activation z-score	Flags	p-value of overlap	Target Molecules in Dataset	Mechanistic Network				Upstream Regulator	Expr Fold Change	Molecule Type	Predicted Activation State	Activation z-score	Flags	p-value of overlap	Target Molecules in Dataset	Mechanistic Network
STAT5B		transcription regulator	Inhibited	-5.175		1.02e-39	A1BG,ABCB1,Adh6-ps1,ALAS2,CA2,CCND1,CCNE1,Cdkn1c,CUX2,CYP17A1,Cyp2a12/Cyp2a22,Cyp2b13/Cyp2b9,CYP2B6,CYP2C8,Cyp2d9 (includes others),CYP3A5,CYP4A11,CYP4A22,Eci3,EGFR,ELOVL3,FAM126A,G0S2,GSTP1,Hamp/Hamp2,HAO2,HSD3B2,Hsd3b4 (includes others),Keg1,LAMA3,MB,MTMR11,Mup1 (includes others),NAT8,NIPAL1,NQO1,NT5E,PROM1,RAD51B,SLC15A5,SLC16A5,Slc22a26,Slco1a1,STAMBPL1,SULT2A1,Sult2a2,TMEM98,TOX,UGT2B28,VNN1	104 (4)				FGF19		growth factor	Activated	2.42		4.73e-25	ACACA,ACACB,AQP4,CCND1,CYP17A1,Cyp2d9 (includes others),Cyp4a14,EGR1,ELOVL3,FASN,HMGCR,HSD3B2,IL1RN,LCN2,LEPR,PROM1,PTGDS,RGS16,RGS2,SERPINA1,SQLE	86 (13)
ACOX1		enzyme	Inhibited	-2.072		4.5e-25	ACSL1,APCS,CYP26A1,Cyp2c54 (includes others),CYP2C8,Cyp2d9 (includes others),Cyp3a25 (includes others),CYP4A11,Cyp4a14,CYP4F12,CYP7B1,EGFR,ELOVL3,FAM214A,GSTP1,HSD3B1,LCN2,Mup1 (includes others),OAT,Orm1 (includes others),QPCT,RAD51B,RGS2,SELENBP1,SERPINA1,SLC22A25,TM4SF4,UCP2,Vnn3	82 (7)				ACOX1		enzyme	Inhibited	-2.357		7.29e-20	CES3,CYP26A1,Cyp2c54 (includes others),CYP2C8,Cyp2d9 (includes others),Cyp4a14,ELOVL3,FASN,GSTP1,HSD3B1,LCN2,LHPP,Mup1 (includes others),OAT,Orm1 (includes others),PDK4,QPCT,RGS2,SERPINA1,SLC22A25,UCP2	67 (7)
TNF		cytokine	Activated	3.811		4.12e-19	ABCG2,ACSL1,ACTA1,ADRB3,APCS,ARRDC3,BMPER,C4A/C4B,CA2,CCND1,CCNE1,CDKN2C,COL4A3,COTL1,CTSC,CYBA,CYP17A1,CYP2C8,CYP7B1,EGFR,EGR1,EMP2,G0S2,GBP2,GBP4,GBP6,GSTP1,Hamp/Hamp2,HCN3,HES1,HLA-A,HSD3B2,IFIT3,IL15,INPP5D,IRF8,ITGA6,ITGB2,ITGB3,LAMA3,LBP,LCN2,MFSD2A,mir-290,Mt1,Mt2,Mx1,NID1,NLRP12,NME1,NQO1,NR4A1,OAS2,Orm1 (includes others),PIK3CD,PPARGC1A,PRKCA,PSMB9,PTPRC,RCAN2,RGS16,RGS2,ROBO1,SAA1,SELPL…	153 (17)				SCAP		other	Inhibited	-2.36	bias	2.19e-17	ACACA,ACACB,ACSS2,ASNS,CSAD,CYP2B6,ELOVL6,FASN,FDFT1,Gstt3,H2-Q8,HMGCR,PDK1,RDH11,SQLE,TFF3	46 (7)
STAT1	1.673	transcription regulator	Activated	3.722	bias	2.19e-16	ALAS2,AXL,C4A/C4B,CCND1,CCNE1,CYP2C8,Cyp2d9 (includes others),CYP3A5,CYP4A11,EGR1,GBP2,GBP4,GBP6,HES1,IFIT3,Igtp,IL15,IRF8,LCN2,Ly6a (includes others),LY6E,Mx1,OAS2,Oasl2,PSMB9,RTP4,SAMD9L,Slfn2,STAT1,TAP1,Wfdc17,ZBP1	134 (14)				SREBF1		transcription regulator	Inhibited	-2.076		8.64e-14	ACACA,ACACB,ACSS2,Bhlhe41,CSAD,ELOVL6,ETHE1,FASN,FDFT1,Gstt3,H2-Q8,HMGCR,OAT,PDK1,PLTP,PTGDS,RDH11,SERPINA1,SQLE,UCP2	85 (16)
PIK3CG		kinase	Inhibited	-3.494		1.6e-13	ABCB1,ATP6V0D2,FCGR3A/FCGR3B,GBP2,GBP4,GBP6,GBP7,H2-L,HLA-A,Igtp,IRGM,ITGB3,OAS2,PIK3CD,STAT1,TAP1,ZBP1	113 (12)				ZBTB20		transcription regulator	Inhibited	-2.714		7.21e-13	ACSS2,Cyp2b13/Cyp2b9,CYP2B6,Cyp2c54 (includes others),CYP2C8,CYP2F1,CYP3A5,FASN,LEPR,PDK4,UGT2B17	51 (7)
IFNG		cytokine	Activated	3.626		4.6e-13	ABCB1,C1QA,C4A/C4B,CCND1,CD5L,CENPM,CFP,CORO1A,CTSC,CYBA,DCT,Defb1,DLL1,EGR1,FCGR3A/FCGR3B,GAS6,GBP2,GBP4,GBP6,GBP7,GSTP1,HLA-A,IFIT3,Igtp,IL15,IRF8,IRGM,ITGA6,ITGB2,ITGB3,LCN2,LIMK1,Ly6a (includes others),LY6E,MFSD2A,Mt1,Mx1,NQO1,NTRK2,OAS2,PCTP,PFKFB3,PPARGC1A,PRKCA,PSMB9,RAC2,RARRES1,RTP4,SERPINA1,Slfn2,STAT1,TAP1,THEMIS2,TRIB2,VCAM1,Wfdc17,XIST,ZBTB16	154 (21)				Gcg		other	Activated	2.111		2.25e-11	APOA4,CES1,CSAD,CYP17A1,CYP2C8,LHPP,MMD2,Mup1 (includes others),OAT,Slco1a1,SULF2
STAT6		transcription regulator	Inhibited	-2.169		6.4e-13	ACSL1,ADAM11,CA2,CYP4A11,Cyp4a14,EGR1,FAM126A,FCGR3A/FCGR3B,GBP2,GBP6,GBP7,HSD3B1,IFIT3,Igtp,IL15,Ly6a (includes others),LY75,MPEG1,Mx1,PLS1,PPARGC1A,PRKCA,RASSF4,SELENBP1,SERPINA1,SERPINB6,SYK,TFF3,VCAM1,ZBP1	157 (18)				TNF		cytokine	Activated	3.087		2.31e-10	ACACA,ADORA1,BMPER,CA2,CCND1,COL4A3,CYP17A1,CYP2C8,EGR1,EMP2,ESR1,FASN,GBP2,GBP4,GBP6,GSTP1,HCN3,HLA-A,HMGCR,HSD3B2,IFI16,IGFBP5,IL1RN,ITGA6,LBP,LCN2,NID1,NLRP12,NR4A1,Orm1 (includes others),PRKCA,RGS16,RGS2,ROBO1,SAA1,SERPINB1,SERPINE2,SLC1A2,Slco1a1,Slco1a4,SQLE,ST3GAL6,SULT2A1,UCP2,VCAM1	93 (15)
Gcg		other	Activated	2.138		9.76e-13	APOA4,CES1,CTSC,CYP17A1,CYP2C8,Hamp/Hamp2,MFSD2A,MMD2,Mup1 (includes others),OAT,RARRES1,Slco1a1,SULF2,VNN1					LEP		growth factor	Activated	2.395		5.97e-10	ACACA,APOA4,CA3,CCND1,CYP17A1,Cyp2a12/Cyp2a22,Cyp2c54 (includes others),CYP2C8,Cyp2d9 (includes others),CYP2F1,CYP3A5,Cyp4a14,EGR1,ELOVL6,ESR1,FASN,HMGCR,IL1RN,LEPR,UCP2,VCAM1	90 (19)
IFNB1		cytokine	Activated	2.868		6.1e-12	AXL,DLL1,GBP2,GBP4,GBP6,GBP7,Hamp/Hamp2,HLA-A,Ifi27l2a/Ifi27l2b,IFIT3,Igtp,IRGM,ITGB3,MCM10,MCM6,Mx1,OAS2,Oasl2,RNASEL,STAT1,Tpm2,UBA7,XIST,ZBP1	68 (10)				INSIG1		other	Activated	2.109	bias	1.62e-09	ACACA,ACACB,ACSS2,ELOVL6,FASN,FDFT1,HMGCR,LCN2,MARCO,SQLE,UCP2	45 (7)
SIRT1		transcription regulator	Inhibited	-3.244		7.24e-12	ABCB1,CCND1,CDKN2C,CORO1A,CYP2B6,GBP6,H2-Q8,HLA-A,Hsd3b4 (includes others),IFIT3,Igtp,IL2RG,IRGM,LAPTM5,LY6E,MAOA,NTRK2,OAS2,Oasl2,PPARGC1A,PSMB9,RGS16,RTP4,Slfn2,STAT1,TAP1,UBA7,UCP2	166 (20)				IFNB1		cytokine	Activated	2.594		6.57e-09	DDX3Y,Eif2s3y,GAS1,GBP2,GBP4,GBP6,GBP7,HLA-A,HMGCR,IFI16,Ifi27l2a/Ifi27l2b,MCM6,Oasl2,PDK4,SQLE,Tpm2	75 (11)
IL6		cytokine	Activated	3.584	bias	1.06e-11	ABCG2,APCS,AQP4,ATP2A1,CCND1,CCNE1,CES1,CFP,CTSC,CYP2B6,CYP2C8,CYP3A5,EGFR,EGR1,GBP2,H2-Q8,Hamp/Hamp2,HLA-A,IL15,IL2RG,ITGB3,LBP,LCN2,LY86,MKI67,Mt1,Mt2,Orm1 (includes others),PROM1,PSMB9,PTP4A3,PTPRC,SAA1,SERPINA1,Slco1a1,STAT1,TAP1,TOP2A,VCAM1	155 (16)				PPARGC1B		transcription regulator	Inhibited	-2.215		1.26e-08	ACACA,ACACB,CCND1,ESRRG,FASN,FDFT1,HMGCR,PDK4,SQLE	48 (8)
IRF7		transcription regulator	Activated	4.157	bias	4.71e-11	GBP4,Hamp/Hamp2,IFIT3,Igtp,IL15,IRF8,IRGM,Ly6a (includes others),Mx1,OAS2,Oasl2,PSMB9,RTP4,SAMD9L,STAT1,TAP1,UBA7,ZBP1	89 (14)				SREBF2		transcription regulator	Inhibited	-2.428		2.89e-08	ACACA,ACSS2,ELOVL6,FASN,FDFT1,HMGCR,RDH11,SQLE,TFF3	81 (15)
Ifnar		group	Activated	3.687	bias	6.48e-11	AXL,GBP2,H2-Q8,HLA-A,IFIT3,IL15,IRF8,Mx1,OAS2,PSMB9,STAT1,TAP1,VCAM1,ZBP1	126 (17)				DBI		other	Inhibited	-2.236		3.58e-08	ACSS2,ELOVL6,FASN,HMGCR,SQLE	21 (3)
Interferon alpha		group	Activated	4.462	bias	4.58e-10	AXL,CCND1,EGFR,GBP2,GBP6,H2-L,HLA-A,IFIT3,IL15,IRF8,Mx1,NT5E,OAS2,Oasl2,PSMB9,RNASEL,RTP4,SAMD9L,SERPINB1,SIGLEC1,Slfn2,STAT1,TAP1,TRIB2,UBA7,VCAM1,ZBP1	71 (11)				INSIG2		other	Activated	2.193	bias	1.33e-07	ACACA,ELOVL6,FASN,FDFT1,HMGCR	44 (6)
TRIM24		transcription regulator	Inhibited	-3.692	bias	5.57e-10	CA2,GBP2,GBP4,Ifi27l2a/Ifi27l2b,IFIT3,Igtp,IRGM,Ly6a (includes others),PSMB9,RTP4,SAMD9L,STAT1,TAP1,UBA7	66 (7)				FOXA2		transcription regulator	Inhibited	-2.213		5.48e-07	CA3,CCND1,CYP26A1,Cyp2a12/Cyp2a22,CYP2A6 (includes others),IGFBP5,PTGDS,SAA1,SERPINA1,Tpm2,UCP2,UGT2B17
IFN alpha/beta		group	Activated	3.383	bias	1.63e-09	AXL,GAS7,H2-Q8,HLA-A,Ifi27l2a/Ifi27l2b,IFIT3,IL15,IRF8,Ly6a (includes others),LY6E,Mx1,STAT1	135 (16)				ATP7B		transporter	Inhibited	-2.449		1.21e-06	Cyp2c40 (includes others),ELOVL6,FASN,FDFT1,HMGCR,SQLE
CG		complex	Activated	2.348	bias	3.01e-09	ABCB1,ACSL1,ADH7,CYP17A1,CYP26A1,EGR1,FAM110C,G0S2,GBP6,GPC1,HLA-A,HSD3B1,HSD3B2,Hsd3b4 (includes others),IFIT3,ITGB3,LEPR,MCM10,NR4A1,Oasl2,PFKFB3,RGS2,SULT2A1	135 (15)				IKBKB		kinase	Activated	2.353		1.56e-06	CCND1,EGR1,FASN,GBP2,HLA-A,IFI16,IL1RN,LCN2,NID1,RGS16,SERPINE2,Tpm2,VCAM1	77 (13)
ABCB6		transporter	Activated	2.476		7.82e-09	ALAS2,Cyp2a12/Cyp2a22,CYP2B6,Cyp2c40 (includes others),Cyp2c54 (includes others),Cyp2d9 (includes others),Cyp3a25 (includes others),CYP3A5,CYP4A11					CHUK		kinase	Activated	2.54		2.8e-06	CCND1,GBP2,GBP4,HLA-A,IFI16,IL1RN,LCN2,NID1,RGS16,SERPINE2,VCAM1	85 (15)
IL1B		cytokine	Activated	3.208		2.94e-08	ABCG2,APCS,AQP4,Cdkn1c,CYBA,CYP2B6,CYP3A5,EGR1,G0S2,GAS6,GBP2,GBP6,H2-L,Hamp/Hamp2,HES1,HLA-A,IFIT3,IL15,ITGB3,LAMA3,LBP,LCN2,Mt1,Mt2,NQO1,NR4A1,OAS2,PPARGC1A,PSMB9,PTGDS,RAC2,RGS16,SAA1,Slco1a1,Slfn2,STAT1,VCAM1	142 (17)				N-cor		group	Activated	2.213		3.11e-06	ACACA,ACACB,CCND1,ELOVL6,ESR1,FASN,GSTP1,LHPP	97 (17)
mir-21		microRNA	Inhibited	-2.555	bias	3.01e-08	CCND1,GBP2,GBP6,GBP7,INPP5D,IRGM,LEPR,MARCO,MKI67,NME1,OAS2,Orm1 (includes others),SIGLEC1,Slfn2,STAT1,TAP1,TOP2A,UBA7,VCAM1	139 (15)				MBTPS1		peptidase	Inhibited	-2		3.74e-06	ACACA,FASN,FDFT1,HMGCR	21 (3)
TGFB1		growth factor	Activated	3.075		9.74e-08	ABCG2,ACTA1,AP3S1,AXL,C1QA,CCND1,CCNE1,Cdkn1c,CDKN2C,COTL1,CTSC,CYBA,CYP17A1,EGR1,ELF4,FCGR3A/FCGR3B,FUT8,GAS7,GBP2,Hamp/Hamp2,HES1,HSD3B2,IFIT3,IL15,INPP5D,ITGA6,ITGB2,ITGB3,LCN2,Ly6a (includes others),MAOA,MKI67,Mx1,NME1,NR4A1,NT5E,PBX1,PIK3CD,PLEK2,PPARGC1A,PRKCA,PROM1,PTGDS,PTP4A3,PTPRC,SELENBP1,SELPLG,SERPINA1,SERPINB1,SERPINE2,ST3GAL6,STAT1,TOP2A,Tpm2,VCAM1	169 (22)				ELOVL5		enzyme	Activated	2.224		3.96e-06	ACACA,ELOVL6,FASN,PDK4,PLTP	46 (8)
HNF4A		transcription regulator	Inhibited	-3.052		1.48e-07	1810053B23Rik,A1BG,ACSL1,APCS,APOA4,C4A/C4B,C6,CAPN8,CCND1,CCNE1,Cdkn1c,CUX2,CYP26A1,Cyp2a12/Cyp2a22,Cyp2b13/Cyp2b9,CYP2B6,CYP2C8,CYP3A5,CYP7B1,EGR1,EID1,FUT8,G0S2,Hamp/Hamp2,HAO2,HLA-A,Hsd3b4 (includes others),IL15,ITGA6,LBP,LCN2,LEPR,MAOA,mir-290,Mt1,Mt2,NAT8,NIPAL1,NME1,NTRK2,PARD3B,PPARGC1A,PPL,PPP1R10,PROM1,PTGDS,SAA1,SCP2,SERPINA1,Slc22a26,SLC22A3,SLC35D1,SLC43A1,Slco1a1,STAT1,SULT2A1,Sult2…	98 (6)				NFKBIA		transcription regulator	Activated	2.259		7.93e-06	CCND1,Cdkn1c,GBP2,HLA-A,IFI16,IL1RN,LCN2,LY6E,NID1,NLRP12,NR4A1,RGS16,SERPINE2,SLC1A2,VCAM1	88 (17)
Ifn		group	Activated	2.084	bias	1.63e-07	CYP4A11,HLA-A,IL15,IRF8,LCN2,Mx1,NTRK2,OAS2,RNASEL,STAT1,TAP1,ZBP1	68 (11)				IL1B		cytokine	Activated	2.576		9.22e-06	AQP4,Cdkn1c,CYP2B6,CYP3A5,EGR1,ESR1,GBP2,GBP6,HLA-A,IFI16,IGFBP5,IL1RN,LBP,LCN2,NR4A1,PDK1,PTGDS,RGS16,SAA1,SLC1A2,Slco1a1,Slco1a4,VCAM1	78 (13)
LLGL2		other	Activated	2.646	bias	1.69e-07	AXL,CDKN2C,EMP2,GAS6,ITGB2,SH2D4A,TOP2A					LGR4		transmembrane receptor	Activated	2		2.76e-05	ESR1,LHPP,OAT,RDH16,SLC1A2
PARP1		enzyme	Activated	2.933		1.95e-07	CCND1,EGFR,GBP2,GBP4,GBP6,GBP7,HES1,Igtp,IRGM,STAT1,TMPRSS2,VCAM1	148 (21)				LGR5		transmembrane receptor	Activated	2		2.97e-05	LHPP,OAT,RDH16,SLC1A2
IRF3		transcription regulator	Activated	3.796	bias	2.06e-07	Hamp/Hamp2,Ifi27l2a/Ifi27l2b,IFIT3,Igtp,IL15,IRGM,LCN2,Mx1,OAS2,Oasl2,PLCG2,SAMD9L,STAT1,TAP1,ZBP1	83 (13)				CYP7A1		enzyme	Inhibited	-2		4.33e-05	ACACA,FASN,FDFT1,HMGCR	64 (12)
IFNAR1		transmembrane receptor	Activated	2.931	bias	2.83e-07	AXL,DLL1,GBP4,HLA-A,IFIT3,IL15,Ly6a (includes others),Mx1,OAS2,Oasl2,RTP4,STAT1,VCAM1	110 (14)				IFNG		cytokine	Activated	2.101		5.34e-05	ADORA1,ASNS,CCND1,EGR1,FASN,GBP2,GBP4,GBP6,GBP7,GSTP1,HLA-A,HMGCR,IFI16,IL1RN,ITGA6,LCN2,Ly6a (includes others),LY6E,NTRK2,PCTP,PRKCA,SERPINA1,SLC1A2,SORT1,SQLE,TSPAN33,VCAM1,ZBTB16	105 (16)
CHUK		kinase	Activated	3.327	bias	4.36e-07	CCND1,CYBA,CYP7B1,GBP2,GBP4,HLA-A,ITGB3,LCN2,Mt1,Mt2,NID1,RGS16,SERPINE2,Slfn2,VCAM1	151 (16)				PARP1		enzyme	Activated	2.389		0.000103	CCND1,FASN,GBP2,GBP4,GBP6,GBP7,VCAM1	95 (18)
PNPT1		enzyme	Inhibited	-2.828	bias	4.88e-07	GBP2,GBP4,GBP6,IFIT3,Oasl2,RTP4,SAMD9L,STAT1	104 (7)				TGFB1		growth factor	Activated	2.479		0.000271	ADORA1,ASNS,C730027H18Rik,CCND1,Cdkn1c,CYP17A1,CYP21A2,EGR1,FASN,GAS1,GAS7,GBP2,HSD3B2,IFI16,IGFBP5,IL1RN,ITGA6,LCN2,Ly6a (includes others),NR4A1,PRKCA,PROM1,PTGDS,RDH11,SERPINA1,SERPINB1,SERPINE2,SLC1A2,ST3GAL6,Tpm2,VCAM1	113 (20)
LEP		growth factor	Activated	2.51		7.41e-07	ADRB3,APOA4,CA3,CCND1,CYBA,CYP17A1,Cyp2a12/Cyp2a22,Cyp2c54 (includes others),CYP2C8,Cyp2d9 (includes others),CYP2F1,CYP3A5,CYP4A11,Cyp4a14,EGR1,ELOVL6,HES1,LEPR,PPARGC1A,SCP2,UCP2,VCAM1	191 (21)				F2R		G-protein coupled receptor	Activated	2.2		0.000286	CCND1,EGR1,ESR1,ITGA6,NR4A1,VCAM1	94 (22)
MYC		transcription regulator	Activated	2.257		1.1e-06	ACTA1,AXL,BMPER,CCND1,CCNE1,CYP26A1,EGR1,FUT8,GBP2,GBP4,GPC1,HES1,HLA-A,IFIT3,ITGA6,Ly6a (includes others),MCM6,MKI67,Mt1,Mt2,NME1,NQO1,Oasl2,OAT,PFKFB3,PPL,PRKCA,PROM1,PTPRC,RARRES1,SCPEP1,SERPINA1,SERPINE2,STAT1,TEAD1,TEAD2,VCAM1,XIST	165 (21)				NR5A1		ligand-dependent nuclear receptor	Activated	2.194		0.000296	CYP17A1,CYP21A2,HSD3B2,LEPR,SULT2A1	31 (6)
NSUN6		enzyme	Activated	2.646	bias	1.14e-06	AXL,CDKN2C,COL4A3,EMP2,GAS6,ITGB2,TOP2A					CXCL12		cytokine	Activated	2.182		0.000379	CA2,CCND1,CYP2A6 (includes others),CYP3A5,EGR1,Ly6a (includes others),NR4A1,ZBTB16	119 (23)
AGT		growth factor	Activated	2.603		1.14e-06	ACTA1,CCND1,CCNE1,CYBA,CYP17A1,CYP4A11,Cyp4a14,EGFR,EGR1,GSTP1,HES1,HSD3B1,HSD3B2,IL15,ITGB3,LEPR,NR4A1,PPARGC1A,RGS2,UCP2,VCAM1,WNK4	194 (26)				RELA		transcription regulator	Activated	2.051		0.000479	CCND1,CYP17A1,CYP2B6,EGR1,IL1RN,NR4A1,PTGDS,SAA1,SERPINE2,SLC1A2,TPMT,VCAM1	94 (20)
HIF1A		transcription regulator	Activated	2.368	bias	1.14e-06	ABCB1,AQP4,AXL,CCND1,Cdkn1c,CORO1A,EGFR,ESRRG,Hamp/Hamp2,IL15,ITGB2,ITGB3,MB,NR4A1,NT5E,NTRK2,PFKFB3,PRKCA,PROM1,TMEM19,VCAM1	163 (24)				THRB		ligand-dependent nuclear receptor	Inhibited	-2.205		0.00071	ACACA,CCND1,FASN,NR4A1,NUDT7,PDK4,PROM1,PTGDS	102 (19)
IKBKB		kinase	Activated	3.125	bias	4.12e-06	CCND1,CYBA,CYP7B1,EGR1,GBP2,HLA-A,ITGB3,LCN2,Mt1,Mt2,NID1,RGS16,SERPINE2,Slfn2,Tpm2,VCAM1	126 (14)				NR1H3		ligand-dependent nuclear receptor	Inhibited	-2.242		0.000822	ACACA,FASN,FDFT1,GBP4,GSTP1,HMGCR,IL1RN,PLTP	80 (15)
MECOM		transcription regulator	Activated	2.402	bias	4.3e-06	CA3,Cdkn1c,ITGA6,ITGB3,Ly6a (includes others),PBX1					MAPK3		kinase	Activated	2.2		0.000934	CCND1,EGR1,ESR1,NR4A1,RGS2	65 (15)
IKBKG		kinase	Activated	2.201	bias	4.67e-06	ACTA1,CYP7B1,GBP2,HLA-A,LCN2,Mt1,Mt2,NID1,RGS16,SERPINE2,Slfn2	151 (16)
OSM		cytokine	Activated	2.176		4.75e-06	CADM4,CCND1,CYP3A5,EGR1,GAS7,GBP2,Hamp/Hamp2,HLA-A,IL15,LBP,LCN2,MAOA,Mt2,PFKFB3,PSMB9,SAA1,SERPINA1,SERPINB1,SLC7A8,STAT1,TAP1,TOP2A,VCAM1	158 (18)
ROR1		kinase	Activated	2.449	bias	5.23e-06	AXL,CDKN2C,EMP2,GAS6,ITGB2,TOP2A	19 (3)
SOCS1		other	Inhibited	-2.071	bias	5.75e-06	CCND1,CCNE1,GBP6,IFIT3,IL15,IRGM,Mx1,OAS2,Oasl2,STAT1,VCAM1	74 (11)
NFKBIA		transcription regulator	Activated	2.648		5.83e-06	AXL,CCND1,Cdkn1c,CYBA,CYP7B1,GBP2,HES1,HLA-A,IL15,LCN2,LY6E,Mt1,Mt2,NID1,NLRP12,NR4A1,RGS16,SERPINE2,Slfn2,VCAM1	174 (17)
CREB3L3		transcription regulator	Activated	2.197	bias	7.33e-06	APCS,APOA4,Cyp2b13/Cyp2b9,CYP2B6,Hamp/Hamp2
miR-199a-5p (and other miRNAs w/seed CCAGUGU)		mature microRNA	Inhibited	-2.813	bias	1.02e-05	ACTA1,COL4A5,ITGB3,LCN2,SAMD9L,TMPRSS2,ZBP1,ZBTB16
JAK2		kinase	Activated	2.415	bias	1.04e-05	CCND1,EGR1,GBP2,LCN2,LY6E,NR4A1,PSMB9,STAT1,TAP1,TRIB2,XIST	144 (21)
TLR9		transmembrane receptor	Activated	2.185	bias	1.15e-05	CCND1,EGR1,Hamp/Hamp2,IFIT3,LAIR1,LCN2,Mx1,NR4A1,OAS2,Oasl2,PFKFB3,STAT1,Wfdc17,ZAP70	148 (17)
TLR4		transmembrane receptor	Activated	3.515	bias	1.22e-05	ACTA1,CYP3A5,GBP2,IFIT3,Igtp,IL15,IRF8,IRGM,LCN2,MARCO,Mx1,NLRP12,NR4A1,RGS16,STAT1,VCAM1,Vnn3,Wfdc17	134 (16)
CSF1		cytokine	Activated	2.082	bias	1.57e-05	CCND1,CCNE1,CYP17A1,EGR1,FCGR3A/FCGR3B,IRF8,ITGB3,MARCO,PFKFB3,PTPRC,SIGLEC1,STAT1,VCAM1	161 (27)
SOX3		transcription regulator	Inhibited	-2.121	bias	1.82e-05	BMPER,CYP26A1,DLL1,GBP4,Oasl2,TEAD1,TEAD2,ZBTB16
TMEM173		other	Activated	2.433	bias	2.48e-05	GAS7,Ifi27l2a/Ifi27l2b,IFIT3,LCN2,Mx1,PTPRC,RGS16	42 (5)
TGM2		enzyme	Activated	3.053		2.64e-05	ACTA1,CA2,CCND1,CFP,IFIT3,ITGA6,ITGB3,LY6E,OAS2,SAMD9L,STAT1,TAP1,UBA7	138 (16)
CXCL12		cytokine	Activated	2.642	bias	3.13e-05	AXL,CA2,CCND1,CYP3A5,DMPK,EGFR,EGR1,ITGB3,Ly6a (includes others),NR4A1,SELPLG,ZBTB16	145 (22)
VEGFA		growth factor	Activated	2.101	bias	3.19e-05	ACSL1,ADRB3,CCND1,CCNE1,DLL1,EGR1,HES1,INPP5D,ITGB3,MKI67,NME1,NR4A1,PPARGC1A,PRKCA,VCAM1	132 (20)
TNFSF11		cytokine	Activated	2.175	bias	3.4e-05	ATP6V0D2,CA2,CCND1,CCNE1,DMPK,IL15,IRF8,ITGB3,LIMK1,RGS16,SAA1,Slfn2,STAT1,VCAM1	168 (24)
RNY3		other	Activated	2.236	bias	3.52e-05	IFIT3,LY6E,OAS2,RTP4,SIGLEC1
NRG1		growth factor	Activated	2.893	bias	3.54e-05	AXL,CCND1,CCNE1,CDKN2C,COL4A3,EGR1,EMP2,GAS6,HES1,ITGB2,ITGB3,NR4A1,SH2D4A,TOP2A	156 (25)
Vegf		group	Activated	2.996	bias	4.32e-05	ABCB1,AQP4,CA2,CDKN2C,COL4A3,CYP4A11,EGR1,EMP2,HES1,ITGA6,LCN2,LY75,MKI67,Mt2,NLRP12,NR4A1,RGS2,STK10,TRIB2,VCAM1	144 (23)
IFNA2		cytokine	Activated	3.493	bias	4.67e-05	GBP2,GBP4,HLA-A,IFIT3,LY6E,NT5E,OAS2,STAT1,TAP1,THEMIS2,UBA7,VCAM1,ZBP1	86 (14)
JAK1		kinase	Activated	2.425	bias	5.58e-05	HLA-A,Oasl2,Orm1 (includes others),PSMB9,SAA1,STAT1,TAP1	155 (18)
SOX1		transcription regulator	Inhibited	-2.449	bias	8.02e-05	BMPER,CYP26A1,GBP4,HES1,Oasl2,TEAD1,TEAD2
PDGF BB		complex	Activated	2.463	bias	8.4e-05	CCND1,CCNE1,EGFR,EGR1,GBP2,HES1,LBP,MCM6,Mt1,Mt2,NR4A1,PLCG2,RGS2,SYK,VCAM1	167 (25)
SRC (family)		group	Activated	2.183	bias	9.25e-05	EGR1,ITGB3,MAOA,PROM1,STAT1,VCAM1	167 (27)
LDL		complex	Activated	2.203	bias	9.31e-05	AXL,CCND1,CYP2C8,EGR1,G0S2,GAS6,ITGB3,MKI67,NME1,NR4A1,SIGLEC1,VCAM1,VNN1	143 (23)
miR-34a-5p (and other miRNAs w/seed GGCAGUG)		mature microRNA	Inhibited	-2.183	bias	0.000123	AXL,CCND1,DENND1C,DLL1,FAM110C,ITGB3,MCM10,SAMD9L,SELPLG
KLF4		transcription regulator	Activated	2.361	bias	0.000136	BMPER,CCND1,CYP26A1,DLL1,GBP4,HES1,Oasl2,PPL,PROM1,SERPINA1,TEAD1,TEAD2,VCAM1	102 (11)
MYD88		other	Activated	2.265	bias	0.000136	ACSL1,APCS,EGR1,HLA-A,IL15,INPP5D,IRF8,MARCO,MKI67,SAA1,VCAM1,Vnn3,ZAP70	149 (18)
RELA		transcription regulator	Activated	2.471	bias	0.000196	ABCB1,ABCG2,CCND1,CYP17A1,CYP2B6,EGR1,HES1,Mx1,NR4A1,OAS2,PSMB9,PTGDS,SAA1,SERPINE2,TAP1,TPMT,VCAM1	190 (22)
CD40LG		cytokine	Activated	2.549	bias	0.000209	AXL,CA2,CFP,CTSC,EGFR,EGR1,G0S2,IFIT3,IL15,PSMB9,RGS2,SELPLG,STAT1,TAP1,VCAM1,ZAP70	150 (19)
TICAM1		other	Activated	2.345	bias	0.000225	ACSL1,EGR1,IFIT3,Igtp,IL15,IRGM,MKI67,Mx1,VCAM1	65 (9)
IFN Beta		group	Activated	2.446	bias	0.000237	HLA-A,IFIT3,IL15,Mt2,Mx1,OAS2,PRKCA,STAT1,ZBP1	69 (12)
IKZF1		transcription regulator	Inhibited	-2.898	bias	0.00028	ALAS2,AXL,CYP7B1,GAS6,HES1,IFIT3,RASSF4,RTP4,ST3GAL6,SULF2,Sult1a1,TENM3
NR4A3		ligand-dependent nuclear receptor	Activated	2.352		0.000295	CCND1,HSD3B2,MB,NQO1,PPARGC1A,UCP2	145 (15)
HGF		growth factor	Activated	2.105	bias	0.000319	ABCG2,CCND1,CDKN2C,CYP17A1,CYP2B6,EGR1,EMP2,HES1,IRF8,ITGA6,LCN2,LY75,MKI67,NR4A1,RGS2,STK10,TRIB2,VCAM1	145 (19)
SMAD3		transcription regulator	Activated	2.003	bias	0.000323	APOA4,CCND1,CCNE1,CES1,EGR1,Hamp/Hamp2,IL15,INPP5D,Ly6a (includes others),Orm1 (includes others),PPARGC1A,PTP4A3	189 (24)
IRF1		transcription regulator	Activated	2.513	bias	0.000346	CCND1,GBP2,H2-L,IFIT3,IL15,OAS2,PSMB9,STAT1,TAP1,VCAM1	158 (19)
ACKR2		G-protein coupled receptor	Inhibited	-2.236	bias	0.000348	Ifi27l2a/Ifi27l2b,IFIT3,OAS2,Oasl2,STAT1
NFkB (complex)		complex	Activated	3.603	bias	0.000375	ABCB1,CCND1,CYP3A5,EGFR,EGR1,G0S2,GAS6,GBP2,HLA-A,IL15,LCN2,NLRP12,PSMB9,RGS16,SAA1,SELPLG,STK10,TAP1,TPMT,VCAM1,Wfdc17	170 (18)
TLR3		transmembrane receptor	Activated	2.55	bias	0.000426	GBP2,GBP4,Hamp/Hamp2,IFIT3,IL15,LCN2,Mx1,NR4A1,Oasl2,PFKFB3,PIK3CD,STAT1	84 (12)
Hbb-b2		other	Activated	2	bias	0.000479	C1QA,CYBA,Hamp/Hamp2,IL2RG,LY86
Pdgf (complex)		complex	Activated	2.055	bias	0.000535	CCND1,CYBA,EGFR,EGR1,ITGB3,MCM6,VCAM1	147 (21)
EP300		transcription regulator	Activated	2.595	bias	0.000595	ACTA1,CA2,CCND1,CCNE1,EGR1,ITGA6,ITGB2,LAMA3,MKI67,NR4A1,PPARGC1A,RNASEL,RTP4,SLC43A1,TMPRSS2,XIST	131 (17)
PPARGC1A	1.53	transcription regulator	Activated	2.132		0.000605	APOA4,BMPER,CTSC,CYP2B6,CYP3A5,EGFR,GAS6,HSD3B2,MB,MCM6,PPARGC1A,SERPINE2,SULT2A1,UCP2	151 (17)
PTCH1		transmembrane receptor	Inhibited	-2		0.000719	ACTA1,CCND1,DLL1,Tpm2
APEX1		enzyme	Activated	2	bias	0.000932	ABCB1,EGR1,NR4A1,RGS2
