# Supplementary material for: Sex-biased genetic programs in liver metabolism and liver fibrosis are controlled by EZH1 and EZH2
Source: PLoS Genet. 2020 May 19;16(5):e1008796. doi: 10.1371/journal.pgen.1008796 (PMC7263639; doi:10.1371/journal.pgen.1008796)
Supplement: S6 Table — A. Sex-biased H3K27me3 sites. Shown are differential H3K27me3 sites in autosomes identified by diffReps comparison of male controls to female controls based on adjusted p-value < 0.05 and |Fold-change >2|. B. Differential H3K27me3 sites in autosomes identified by diffReps comparing E1/E2-KO males to male controls. C. Differential H3K27me3 sites in autosomes identified by diffReps comparing E1/E2-KO females to female controls. D. Differential H3K27me3 sites in autosomes identified by diffReps comparing E1/E2-KO males to E1/E2-KO females. E. H3K27ac sites showing significant differences in control male liver compared to control female liver (sex-biased H3K27ac sites). F. H3K27ac sites showing significant differences in E2-KO male liver compared to male liver controls. G. H3K27ac sites showing significant differences in E2-KO female liver compared to female liver controls. H. H3K27ac sites showing significant differences in E1/E2-KO male liver compared E1/E2-KO female liver. I. 3K4me1 sites showing significant differences in control male liver compared to control female liver (sex-biased H3K27ac sites). J. H3K4me1 sites showing significant differences in E2-KO male liver compared to male liver controls. K. H3K4me1 sites showing significant differences in E2-KO female liver compared to female liver controls. L.H3K4me1 sites showing significant differences in E2-KO male liver compared to E2-KO male liver. M. Up-regulated genes associated with differential histone marks. H3K27ac and H3K4me1 differential sites were mapped to their putative target genes using GREAT (McLean et al., 2010). H3K27me3 differential sites were mapped to their putative target genes if the region overlapped the gene body or the 3 kb genomic region surrounding the TSS (see Methods). 846 Genes up-regulated in E1/E2-KO males compared to control male liver were classified into 8 different groups based on the patterns of differential histone marks associated with each gene. (XLSX) [file pgen.1008796.s014.xlsx]

## Sheet: S6A_Sex-biased H3K27me3
S6A Table - Sex-biased H3K27me3 sites. Shown are differential H3K27me3 sites in autosomes identified by diffReps comparison of male controls to female controls based on adjusted p-value < 0.05 and |Fold-change >2|. Columns A-C show the location of the site, Columns D-E show unique peak IDs. Column F shows the length of the site, Column G shows the average normalized read counts for the male group…
Chrom	Start	End	ID	ID	Length	Male Avg	Female Avg	Event	log2FC	pval	padj	Gene Name	Transcript	Strand	TSS	TES	Feature	D2TSS
chr1	3657401	3658400	1kb_1	M_F_1	1000	14.99	5.78	Up	1.38	2.59e-05	0.000300968	Xkr4	NM_001011874	-	3204562	3661578	Genebody	3677.5
chr1	37006201	37007300	1kb_5	M_F_2	1100	13.89	5.12	Up	1.44	1.74e-05	0.00021106	0	0	0	0	0	OtherIntergenic	NA
chr1	43313601	43314600	1kb_8	M_F_3	1000	12.45	4.41	Up	1.5	4.63e-05	0.000510389	0	0	0	0	0	OtherIntergenic	NA
chr1	43321901	43323200	1kb_9	M_F_4	1300	19.59	8.63	Up	1.18	1.87e-05	0.000225401	0	0	0	0	0	OtherIntergenic	NA
chr1	61569701	61570700	1kb_14	M_F_5	1000	14.99	5.96	Up	1.33	6.59e-05	0.000702917	0	0	0	0	0	OtherIntergenic	NA
chr1	90192401	90194000	1kb_27	M_F_6	1600	39.36	17.99	Up	1.13	7.64e-06	0.000100742	0	0	0	0	0	OtherIntergenic	NA
chr1	92302801	92304100	1kb_28	M_F_7	1300	34.65	15.73	Up	1.14	1.39e-06	2.23e-05	0	0	0	0	0	OtherIntergenic	NA
chr1	137715501	137716600	1kb_30	M_F_8	1100	14.37	29.52	Down	-1.04	4.72e-05	0.000518271	Lad1	NM_133664	+	137715174	137729917	Promoter1k	876.5
chr1	164884401	164885400	1kb_43	M_F_9	1000	15.41	3.12	Up	2.31	4.18e-08	1.06e-06	Fmo3	NM_008030	-	164883930	164914621	Genebody	29720.5
chr1	171199401	171200400	1kb_52	M_F_10	1000	16.79	7.16	Up	1.23	3.79e-05	0.00042716	0	0	0	0	0	Genedesert	NA
chr1	172892201	172893200	1kb_53	M_F_11	1000	15.21	5.43	Up	1.49	2.33e-05	0.000273855	Fcgr2b	NM_001077189	-	172890688	172906201	Genebody	13500.5
chr1	173497301	173498600	1kb_54	M_F_12	1300	18.84	7.9	Up	1.25	2.57e-05	0.000298764	Cd244	NM_018729	+	173489323	173515446	Genebody	8627.5
chr1	190156301	190157300	1kb_70	M_F_13	1000	22.14	10.43	Up	1.09	2.45e-05	0.000287361	Ush2a	NM_021408	+	190086716	190788917	Genebody	70084.5
chr10	18401101	18402200	1kb_71	M_F_14	1100	15.93	6.31	Up	1.34	2.66e-05	0.000307651	D10Bwg1379e	NM_001033258	-	18307816	18463563	Genebody	61912.5
chr10	19205101	19206100	1kb_72	M_F_15	1000	16.68	7.05	Up	1.24	5.28e-05	0.000573932	0	0	0	0	0	OtherIntergenic	NA
chr10	20082501	20083500	1kb_74	M_F_16	1000	13.41	4.85	Up	1.47	4.72e-05	0.000518271	0	0	0	0	0	OtherIntergenic	NA
chr10	22472601	22473600	1kb_75	M_F_17	1000	12.75	3.37	Up	1.92	1.39e-06	2.23e-05	0	0	0	0	0	OtherIntergenic	NA
chr10	23051001	23052000	1kb_79	M_F_18	1000	13.41	4.88	Up	1.46	4.72e-05	0.000518271	Eya4	NM_010167	-	22823973	23069708	Genebody	18207.5
chr10	24838501	24839500	1kb_80	M_F_19	1000	15.7	6.13	Up	1.36	4.64e-05	0.000510908	0	0	0	0	0	OtherIntergenic	NA
chr10	33529501	33530700	1kb_88	M_F_20	1200	18.24	3.81	Up	2.26	9.38e-09	2.91e-07	0	0	0	0	0	OtherIntergenic	NA
chr10	33539101	33540100	1kb_89	M_F_21	1000	15.24	4.22	Up	1.85	6.69e-07	1.17e-05	0	0	0	0	0	OtherIntergenic	NA
chr10	33580801	33581800	1kb_90	M_F_22	1000	14.07	2.18	Up	2.69	5.58e-10	2.79e-08	Sult3a1	NM_020565	+	33577527	33599280	Genebody	3773.5
chr10	40855701	40856700	1kb_100	M_F_23	1000	14.43	5.9	Up	1.29	8.46e-05	0.000880622	0	0	0	0	0	OtherIntergenic	NA
chr10	43901201	43902200	1kb_101	M_F_24	1000	13.54	4.72	Up	1.52	1.56e-05	0.000191444	Speer5-ps1	NR_001582	+	43890252	43939390	Genebody	11448.5
chr10	44201301	44202300	1kb_102	M_F_25	1000	17.72	7.94	Up	1.16	4.96e-05	0.000543114	0	0	0	0	0	OtherIntergenic	NA
chr10	44242501	44243800	1kb_103	M_F_26	1300	25.2	11.74	Up	1.1	8.7e-06	0.000113112	0	0	0	0	0	OtherIntergenic	NA
chr10	55663201	55664200	1kb_107	M_F_27	1000	15.71	6.04	Up	1.38	3.36e-05	0.000382142	0	0	0	0	0	Genedesert	NA
chr10	67332001	67333500	1kb_110	M_F_28	1500	23.12	6.71	Up	1.78	3.25e-09	1.18e-07	0	0	0	0	0	OtherIntergenic	NA
chr10	70038401	70039400	1kb_111	M_F_29	1000	15.21	5.59	Up	1.44	8.34e-06	0.000108699	Phyhipl	NM_001162846	-	70020433	70055559	Genebody	16658.5
chr10	76452301	76453300	1kb_112	M_F_30	1000	14.43	5.77	Up	1.32	5.42e-05	0.000587281	0	0	0	0	0	OtherIntergenic	NA
chr10	85627301	85628300	1kb_113	M_F_31	1000	17.04	6.79	Up	1.33	8.74e-05	0.000904985	Syn3	NM_013722	-	85511492	85961640	Genebody	333840
chr10	86833701	86834900	1kb_117	M_F_32	1200	23.55	11.15	Up	1.08	1.7e-05	0.000207578	0	0	0	0	0	OtherIntergenic	NA
chr10	90301601	90302600	1kb_118	M_F_33	1000	13.28	4.64	Up	1.52	1.62e-05	0.000198903	Anks1b	NM_001128086	+	89336253	90436048	Genebody	965848
chr10	106452701	106453700	1kb_125	M_F_34	1000	13.71	3.84	Up	1.84	8.83e-07	1.49e-05	Acss3	NM_198636	-	106402137	106560719	Genebody	107518
chr10	106472501	106473700	1kb_129	M_F_35	1200	17.62	5.36	Up	1.72	1.19e-07	2.6e-06	Acss3	NM_198636	-	106402137	106560719	Genebody	87618.5
chr10	115755601	115756700	1kb_135	M_F_36	1100	21.65	8.96	Up	1.27	1.92e-06	2.95e-05	Ptprb	NM_029928	+	115738429	115826593	Genebody	17721.5
chr10	122970301	122971300	1kb_137	M_F_37	1000	14.96	6.2	Up	1.27	9.38e-05	0.000962587	Fam19a2	NM_182807	+	122701131	123178034	Genebody	269670
chr10	123277201	123278800	1kb_138	M_F_38	1600	22.83	7.55	Up	1.6	1.35e-07	2.9e-06	0	0	0	0	0	OtherIntergenic	NA
chr11	11901301	11902400	1kb_141	M_F_39	1100	15.48	5.36	Up	1.53	2.82e-06	4.16e-05	Grb10	NM_010345	-	11830510	11937357	Genebody	35506.5
chr11	26017601	26018600	1kb_152	M_F_40	1000	21.31	10.03	Up	1.09	3.02e-05	0.000347316	5730522E02Rik	NR_027973	-	25516846	26110575	Genebody	92474.5
chr11	35342701	35343700	1kb_178	M_F_41	1000	17.78	7.58	Up	1.23	4.87e-05	0.000534214	Slit3	NM_011412	+	34934957	35522004	Genebody	408244
chr11	49769101	49770200	1kb_180	M_F_42	1100	16.57	7.53	Up	1.14	0.000166494	0.00168622	Rasgef1c	NM_029004	+	49715336	49793724	Genebody	54314.5
chr11	49823801	49824800	1kb_181	M_F_43	1000	15.47	6.15	Up	1.33	4.64e-05	0.000510908	0	0	0	0	0	OtherIntergenic	NA
chr11	50783901	50784900	1kb_187	M_F_44	1000	14.83	5.67	Up	1.39	5.06e-05	0.000552825	Olfr1378	NM_146910	+	50782521	50783468	Promoter3k	1879.5
chr11	53914901	53915900	1kb_188	M_F_45	1000	19.37	7.92	Up	1.29	3.6e-05	0.000406937	P4ha2	NM_001136076	+	53914425	53945168	Promoter1k	975.5
chr11	54096301	54097300	1kb_189	M_F_46	1000	13.57	4.91	Up	1.47	2.3e-05	0.000271225	0	0	0	0	0	OtherIntergenic	NA
chr11	64045901	64046900	1kb_205	M_F_47	1000	12.96	4.82	Up	1.43	5.01e-05	0.000548335	0	0	0	0	0	OtherIntergenic	NA
chr11	65732601	65733600	1kb_206	M_F_48	1000	13.96	5.31	Up	1.39	5.21e-05	0.000567556	Dnahc9	NM_001099633	-	65644825	65982052	Genebody	248952
chr11	72082501	72083700	1kb_207	M_F_49	1200	21.6	9.73	Up	1.15	2.16e-05	0.000255765	Slc13a5	NM_001004148	-	72055496	72080105	Promoter3k	-2995.5
chr11	81488001	81489000	1kb_210	M_F_50	1000	16.11	6.25	Up	1.37	7.27e-05	0.00076486	Accn1	NM_001034013	-	80693666	81781897	Genebody	293396
chr11	93464701	93465700	1kb_212	M_F_51	1000	16.12	6.65	Up	1.28	5.08e-05	0.000554906	0	0	0	0	0	OtherIntergenic	NA
chr11	99445301	99446300	1kb_214	M_F_52	1000	14.62	5.78	Up	1.34	5.06e-05	0.000552825	Krtap1-4	NM_001039502	-	99443862	99444990	Promoter1k	-810.5
chr11	107891801	107892800	1kb_220	M_F_53	1000	15.93	6.4	Up	1.31	3.97e-05	0.000443614	Prkca	NM_011101	-	107794700	108205201	Genebody	312900
chr11	108345301	108346300	1kb_226	M_F_54	1000	13.29	5.06	Up	1.39	6.88e-05	0.000727912	Ccdc46	NM_029606	+	108286579	108721928	Genebody	59221.5
chr11	112672901	112673900	1kb_230	M_F_55	1000	5.15	13.95	Down	-1.44	3.99e-05	0.000444951	0	0	0	0	0	OtherIntergenic	NA
chr12	10563701	10564700	1kb_232	M_F_56	1000	14.3	5.24	Up	1.45	4.46e-05	0.000493813	0	0	0	0	0	OtherIntergenic	NA
chr12	37785801	37786800	1kb_255	M_F_57	1000	16.5	6.89	Up	1.26	6.46e-05	0.000690074	0	0	0	0	0	OtherIntergenic	NA
chr12	45691701	45692700	1kb_261	M_F_58	1000	14.22	5.51	Up	1.37	7.17e-05	0.000755353	Nrcam	NM_176930	+	45429871	45702832	Genebody	262330
chr12	78830501	78831500	1kb_278	M_F_59	1000	17.42	7.54	Up	1.21	2.66e-05	0.000307693	0	0	0	0	0	OtherIntergenic	NA
chr12	82932201	82933200	1kb_286	M_F_60	1000	13.94	5.33	Up	1.39	5.71e-05	0.000615632	0	0	0	0	0	OtherIntergenic	NA
chr12	85364501	85365500	1kb_297	M_F_61	1000	15.09	4.38	Up	1.78	4.18e-07	7.71e-06	0	0	0	0	0	OtherIntergenic	NA
chr12	118208201	118209200	1kb_303	M_F_62	1000	14.25	5.01	Up	1.51	1.5e-05	0.000184578	Ptprn2	NM_011215	+	117724192	118516638	Genebody	484508
chr12	119228501	119229700	1kb_305	M_F_63	1200	20.25	8.49	Up	1.25	3.75e-06	5.34e-05	Dnahc11	NM_010060	-	119116454	119437515	Genebody	208414
chr13	16515101	16516100	1kb_311	M_F_64	1000	12.99	4.4	Up	1.56	2.12e-05	0.000251091	0	0	0	0	0	OtherIntergenic	NA
chr13	38787701	38788700	1kb_318	M_F_65	1000	17.93	7.58	Up	1.24	7.34e-05	0.000771976	0	0	0	0	0	OtherIntergenic	NA
chr13	48668101	48669100	1kb_331	M_F_66	1000	17.54	7.73	Up	1.18	6.62e-05	0.000705147	0	0	0	0	0	OtherIntergenic	NA
chr13	54337901	54338900	1kb_332	M_F_67	1000	16.64	6.41	Up	1.38	7.34e-05	0.00077159	0	0	0	0	0	OtherIntergenic	NA
chr13	63584901	63586200	1kb_335	M_F_68	1300	17.21	6.47	Up	1.41	4.64e-06	6.46e-05	0	0	0	0	0	OtherIntergenic	NA
chr13	67503901	67505000	1kb_336	M_F_69	1100	17.68	5.6	Up	1.66	2.87e-06	4.21e-05	0	0	0	0	0	OtherIntergenic	NA
chr13	67521801	67522800	1kb_337	M_F_70	1000	19.14	7.59	Up	1.33	1.12e-05	0.000141899	Zfp459	NM_177811	-	67506657	67522353	ProximalPromoter	52.5
chr13	70868901	70869900	1kb_338	M_F_71	1000	13.23	5.07	Up	1.38	6.88e-05	0.000727912	Adamts16	NM_172053	-	70866685	70980687	Genebody	111286
chr13	71174201	71175200	1kb_339	M_F_72	1000	13.45	4.4	Up	1.61	4.87e-06	6.74e-05	0	0	0	0	0	Genedesert	NA
chr13	112081401	112082400	1kb_351	M_F_73	1000	23.39	10.2	Up	1.2	2.95e-05	0.000339944	0	0	0	0	0	OtherIntergenic	NA
chr14	13563001	13564000	1kb_359	M_F_74	1000	16.96	6.81	Up	1.32	2.01e-05	0.000240122	Cadps	NM_012061	-	13205076	13655592	Genebody	92091.5
chr14	19531101	19532400	1kb_360	M_F_75	1300	20.35	7	Up	1.54	1.24e-06	2.01e-05	Ube2e2	NM_144839	-	19406090	19726140	Genebody	194390
chr14	22532501	22533500	1kb_361	M_F_76	1000	15.98	6.61	Up	1.27	5.08e-05	0.000554906	Dupd1	NM_001013826	-	22495793	22533797	Promoter1k	796.5
chr14	30351301	30352600	1kb_366	M_F_77	1300	21.47	9.45	Up	1.18	9.06e-06	0.000117205	Cacna2d3	NM_009785	-	29718128	30535049	Genebody	183098
chr14	64249601	64250600	1kb_380	M_F_78	1000	14.79	5.55	Up	1.42	1.8e-05	0.00021725	0	0	0	0	0	OtherIntergenic	NA
chr14	64279301	64280400	1kb_381	M_F_79	1100	16.86	7.07	Up	1.25	4.56e-05	0.00050417	0	0	0	0	0	OtherIntergenic	NA
chr14	70047001	70048200	1kb_383	M_F_80	1200	17.46	7.1	Up	1.3	2.29e-05	0.000269842	Loxl2	NM_033325	+	70009282	70095639	Genebody	38318.5
chr14	78337001	78338100	1kb_384	M_F_81	1100	4.87	14.59	Down	-1.58	1.67e-05	0.000204672	Epsti1	NM_178825	+	78304045	78363982	Genebody	33505.5
chr14	106195101	106196200	1kb_389	M_F_82	1100	15.45	6.39	Up	1.27	0.000121561	0.00123377	0	0	0	0	0	OtherIntergenic	NA
chr15	11165001	11166100	1kb_401	M_F_83	1100	18.73	6.95	Up	1.43	7.65e-07	1.31e-05	Adamts12	NM_175501	+	10994544	11276621	Genebody	171006
chr15	11187801	11189000	1kb_402	M_F_84	1200	20.14	8.01	Up	1.33	1.89e-06	2.91e-05	Adamts12	NM_175501	+	10994544	11276621	Genebody	193856
chr15	54117001	54118100	1kb_419	M_F_85	1100	14.77	5.98	Up	1.3	7.17e-05	0.000755353	0	0	0	0	0	OtherIntergenic	NA
chr15	59966701	59967700	1kb_420	M_F_86	1000	13.15	4.85	Up	1.44	4.72e-05	0.000518271	0	0	0	0	0	OtherIntergenic	NA
chr15	60822901	60824200	1kb_432	M_F_87	1300	18.05	5.77	Up	1.65	3.49e-06	5.02e-05	0	0	0	0	0	Genedesert	NA
chr15	67773701	67774700	1kb_436	M_F_88	1000	14.38	4.72	Up	1.61	3.17e-06	4.61e-05	0	0	0	0	0	OtherIntergenic	NA
chr15	84407001	84408000	1kb_458	M_F_89	1000	20.38	9.58	Up	1.09	4.93e-05	0.000540607	0	0	0	0	0	OtherIntergenic	NA
chr15	90909001	90910200	1kb_460	M_F_90	1200	16.27	6.94	Up	1.23	7.04e-05	0.000743453	0	0	0	0	0	OtherIntergenic	NA
chr16	6389701	6390700	1kb_475	M_F_91	1000	14.63	5.54	Up	1.4	1.9e-05	0.00022821	A2bp1	NM_021477	+	5884885	7412571	Genebody	505316
chr16	10194101	10195100	1kb_476	M_F_92	1000	21.83	10.71	Up	1.03	6.54e-05	0.000697975	Atf7ip2	NM_029253	+	10192998	10237379	Promoter3k	1602.5
chr16	10823501	10824500	1kb_477	M_F_93	1000	17.84	7.06	Up	1.34	9.24e-05	0.000952508	0	0	0	0	0	OtherIntergenic	NA
chr16	26010501	26011700	1kb_478	M_F_94	1200	17.51	7.61	Up	1.2	4.87e-05	0.000534214	Leprel1	NM_173379	-	25960408	26105869	Genebody	94768.5
chr16	41142801	41143900	1kb_481	M_F_95	1100	14.4	3.61	Up	2	8.44e-08	1.93e-06	0	0	0	0	0	Genedesert	NA
chr16	52018201	52019200	1kb_483	M_F_96	1000	16.88	7.63	Up	1.15	9.53e-05	0.000974697	0	0	0	0	0	Genedesert	NA
chr16	56816401	56817600	1kb_485	M_F_97	1200	17.04	6.19	Up	1.46	2.22e-05	0.000261503	Tmem45a	NM_019631	-	56805273	56886275	Genebody	69274.5
chr16	76144801	76145900	1kb_498	M_F_98	1100	16.8	5.83	Up	1.53	5.8e-06	7.87e-05	0	0	0	0	0	OtherIntergenic	NA
chr16	77960101	77961100	1kb_504	M_F_99	1000	14.1	5.33	Up	1.4	4.46e-05	0.000493813	0	0	0	0	0	OtherIntergenic	NA
chr16	84650301	84651300	1kb_505	M_F_100	1000	13.64	5.29	Up	1.37	9.31e-05	0.000957517	0	0	0	0	0	Genedesert	NA
chr16	87552501	87553500	1kb_506	M_F_101	1000	15.97	6.7	Up	1.25	5.46e-05	0.000591956	ORF63	NM_144854	+	87553574	87595579	Promoter1k	-573.5
chr16	88212401	88213400	1kb_510	M_F_102	1000	14.67	5.93	Up	1.31	6.59e-05	0.000702917	Grik1	NM_010348	-	87896141	88290502	Genebody	77601.5
chr16	93350001	93351000	1kb_515	M_F_103	1000	13.34	2.83	Up	2.24	6.5e-08	1.55e-06	0	0	0	0	0	OtherIntergenic	NA
chr17	8920601	8921600	1kb_516	M_F_104	1000	14.46	5.54	Up	1.38	3.84e-05	0.000431896	0	0	0	0	0	OtherIntergenic	NA
chr17	9066001	9067000	1kb_517	M_F_105	1000	14.64	5.75	Up	1.35	8.18e-05	0.000853944	Pde10a	NM_011866	+	8994609	9179512	Genebody	71891.5
chr17	15372801	15373800	1kb_523	M_F_106	1000	19.27	8.95	Up	1.11	9.38e-05	0.000962587	0	0	0	0	0	OtherIntergenic	NA
chr17	36618501	36620700	1kb_537	M_F_107	2200	35.46	12.23	Up	1.54	6.51e-10	3.16e-08	0	0	0	0	0	OtherIntergenic	NA
chr17	45391201	45392200	1kb_544	M_F_108	1000	16.01	6.21	Up	1.37	2.66e-05	0.000307651	0	0	0	0	0	OtherIntergenic	NA
chr17	50321201	50322300	1kb_545	M_F_109	1100	14.74	5.66	Up	1.38	5.06e-05	0.000552825	Rftn1	NM_181397	-	50132631	50329821	Genebody	8070.5
chr17	51602601	51603600	1kb_546	M_F_110	1000	15.13	6.03	Up	1.33	3.49e-05	0.000395401	0	0	0	0	0	OtherIntergenic	NA
chr17	73719801	73720800	1kb_551	M_F_111	1000	14.88	6.15	Up	1.27	9.38e-05	0.000962587	Capn13	NM_001033444	-	73655803	73748635	Genebody	28334.5
chr17	80169401	80170400	1kb_552	M_F_112	1000	15.02	5.69	Up	1.4	2.59e-05	0.000300968	0	0	0	0	0	OtherIntergenic	NA
chr17	80177301	80178400	1kb_553	M_F_113	1100	16.86	5.87	Up	1.52	2.26e-05	0.000266049	0	0	0	0	0	OtherIntergenic	NA
chr17	87453101	87454100	1kb_556	M_F_114	1000	20.26	10.01	Up	1.02	9.05e-05	0.00093474	0	0	0	0	0	OtherIntergenic	NA
chr17	90856901	90857900	1kb_557	M_F_115	1000	14.45	5.79	Up	1.32	5.06e-05	0.000552825	Nrxn1	NM_177284	-	90432983	91492141	Genebody	634740
chr18	23930901	23931900	1kb_565	M_F_116	1000	17.86	7.78	Up	1.2	3.4e-05	0.000386196	Mapre2	NM_001162941	+	23912225	24052361	Genebody	19175.5
chr18	30257701	30258800	1kb_566	M_F_117	1100	14.58	5.56	Up	1.39	1.9e-05	0.00022821	0	0	0	0	0	Genedesert	NA
chr18	37324201	37325200	1kb_575	M_F_118	1000	14.84	5.32	Up	1.48	1.31e-05	0.00016367	Pcdhac2	NM_001003672	+	37303622	37347310	Genebody	21078.5
chr18	42844001	42845000	1kb_576	M_F_119	1000	20.61	9.97	Up	1.05	9.05e-05	0.00093474	Ppp2r2b	NM_027531	-	42804922	43058642	Genebody	214142
chr18	42940201	42941300	1kb_580	M_F_120	1100	19.25	5.69	Up	1.76	7.19e-07	1.24e-05	Ppp2r2b	NM_027531	-	42804922	43058642	Genebody	117892
chr18	53733001	53734000	1kb_582	M_F_121	1000	13.55	5.05	Up	1.42	6.36e-05	0.000679549	Prdm6	NM_001033281	+	53624199	53735510	Genebody	109302
chr18	62382301	62383300	1kb_589	M_F_122	1000	14.93	5.51	Up	1.44	1.8e-05	0.00021725	0	0	0	0	0	OtherIntergenic	NA
chr18	81554801	81555800	1kb_596	M_F_123	1000	16.32	5.26	Up	1.63	1.26e-06	2.03e-05	0	0	0	0	0	Genedesert	NA
chr18	85121901	85122900	1kb_597	M_F_124	1000	24.42	11.12	Up	1.13	4.39e-05	0.000487931	Fbxo15	NM_015798	+	85104416	85150783	Genebody	17984.5
chr19	7926001	7927000	1kb_601	M_F_125	1000	12.45	3.1	Up	2	7.97e-07	1.36e-05	0	0	0	0	0	OtherIntergenic	NA
chr19	11838601	11839600	1kb_602	M_F_126	1000	16.04	6.83	Up	1.23	7.04e-05	0.000743453	0	0	0	0	0	OtherIntergenic	NA
chr19	14978701	14979700	1kb_604	M_F_127	1000	15.81	5.95	Up	1.41	1.67e-05	0.000204672	0	0	0	0	0	Genedesert	NA
chr19	17575101	17576100	1kb_606	M_F_128	1000	13.05	4.45	Up	1.55	2.12e-05	0.000251091	0	0	0	0	0	OtherIntergenic	NA
chr19	20837401	20838400	1kb_610	M_F_129	1000	16.74	5.15	Up	1.7	2.77e-06	4.09e-05	0	0	0	0	0	OtherIntergenic	NA
chr19	22434601	22435600	1kb_611	M_F_130	1000	15.4	6.18	Up	1.32	4.64e-05	0.000510908	Trpm3	NM_001035243	+	22213606	23064371	Genebody	221494
chr19	31779601	31780700	1kb_620	M_F_131	1100	15.06	5.8	Up	1.38	2.41e-05	0.000282698	Prkg1	NM_001013833	-	30642040	31839522	Genebody	59371.5
chr19	32416201	32417600	1kb_625	M_F_132	1400	17.54	6.24	Up	1.49	8e-07	1.37e-05	Sgms1	NM_001168525	-	32197217	32423805	Genebody	6904.5
chr19	34132001	34133500	1kb_626	M_F_133	1500	18.92	7.55	Up	1.32	4.13e-06	5.82e-05	0	0	0	0	0	OtherIntergenic	NA
chr19	34164301	34165300	1kb_627	M_F_134	1000	14.03	4.04	Up	1.8	7.29e-06	9.64e-05	0	0	0	0	0	OtherIntergenic	NA
chr19	38129701	38130700	1kb_645	M_F_135	1000	15.98	6.71	Up	1.25	5.46e-05	0.000591956	Cep55	NM_001164362	+	38129531	38148914	Promoter1k	669.5
chr19	40052101	40053100	1kb_647	M_F_136	1000	13.28	4.73	Up	1.49	1.62e-05	0.000198903	0	0	0	0	0	OtherIntergenic	NA
chr19	40686201	40687400	1kb_648	M_F_137	1200	9.45	20.52	Down	-1.12	7.01e-05	0.000740889	Tctn3	NM_026260	-	40670935	40686704	ProximalPromoter	-96.5
chr19	43092901	43094100	1kb_649	M_F_138	1200	17.75	6.96	Up	1.35	8.52e-06	0.000110935	Hpse2	NM_001081257	-	42863084	43462800	Genebody	369300
chr2	10298601	10299600	1kb_658	M_F_139	1000	13.97	5.55	Up	1.33	7.17e-05	0.000755353	Sfmbt2	NM_177386	+	10294208	10516786	Genebody	4892.5
chr2	17205001	17206000	1kb_659	M_F_140	1000	15.8	6.42	Up	1.3	7.17e-05	0.000755353	0	0	0	0	0	OtherIntergenic	NA
chr2	17213001	17214000	1kb_660	M_F_141	1000	13.24	4.92	Up	1.43	4.72e-05	0.000518271	0	0	0	0	0	OtherIntergenic	NA
chr2	18705901	18706900	1kb_661	M_F_142	1000	14.6	5.76	Up	1.34	5.06e-05	0.000552825	0	0	0	0	0	OtherIntergenic	NA
chr2	32673001	32674000	1kb_663	M_F_143	1000	16.62	6.92	Up	1.26	5.45e-05	0.000590674	Stxbp1	NM_009295	-	32643126	32702751	Genebody	29250.5
chr2	33870301	33871300	1kb_664	M_F_144	1000	18.57	6.94	Up	1.42	1.3e-06	2.1e-05	0	0	0	0	0	OtherIntergenic	NA
chr2	46963401	46964400	1kb_669	M_F_145	1000	14.15	5.4	Up	1.39	5.84e-05	0.000628701	0	0	0	0	0	Genedesert	NA
chr2	50346401	50347400	1kb_670	M_F_146	1000	14.28	4.68	Up	1.61	1.37e-05	0.000170249	0	0	0	0	0	OtherIntergenic	NA
chr2	51889301	51890600	1kb_671	M_F_147	1300	21.1	8.04	Up	1.39	3.28e-06	4.75e-05	0	0	0	0	0	OtherIntergenic	NA
chr2	60436201	60437200	1kb_678	M_F_148	1000	17.42	6.32	Up	1.46	1.94e-05	0.000232711	Itgb6	NM_021359	-	60436349	60511749	Genebody	75048.5
chr2	60439101	60440100	1kb_679	M_F_149	1000	15.7	5.78	Up	1.44	3.33e-05	0.000379937	Itgb6	NM_021359	-	60436349	60511749	Genebody	72148.5
chr2	63700901	63702200	1kb_680	M_F_150	1300	19.35	6.98	Up	1.47	3.39e-06	4.9e-05	0	0	0	0	0	OtherIntergenic	NA
chr2	73925601	73926600	1kb_683	M_F_151	1000	14.41	5.79	Up	1.32	5.42e-05	0.000587281	0	0	0	0	0	OtherIntergenic	NA
chr2	102535201	102536200	1kb_688	M_F_152	1000	20.29	8.42	Up	1.27	2.23e-05	0.000263226	Slc1a2	NM_001077514	+	102498839	102630940	Genebody	36861.5
chr2	131641301	131642300	1kb_702	M_F_153	1000	16.56	7.08	Up	1.23	5.28e-05	0.000573932	0	0	0	0	0	OtherIntergenic	NA
chr2	135890801	135891800	1kb_703	M_F_154	1000	13.31	3.97	Up	1.74	3.39e-06	4.9e-05	6330527O06Rik	NM_029530	+	135883662	135895652	Genebody	7638.5
chr2	163042301	163043300	1kb_711	M_F_155	1000	12.75	4.46	Up	1.51	3.94e-05	0.000440602	0	0	0	0	0	OtherIntergenic	NA
chr2	163708801	163709800	1kb_712	M_F_156	1000	18.39	7.62	Up	1.27	3.51e-05	0.000397643	Rims4	NM_183023	-	163689616	163744418	Genebody	35117.5
chr2	166157701	166158700	1kb_714	M_F_157	1000	12.72	4.72	Up	1.43	6.68e-05	0.000709379	0	0	0	0	0	OtherIntergenic	NA
chr2	166904201	166905200	1kb_715	M_F_158	1000	16.07	6.4	Up	1.33	2.04e-05	0.000243528	0	0	0	0	0	OtherIntergenic	NA
chr2	172905501	172906600	1kb_716	M_F_159	1100	7.67	17.67	Down	-1.2	8.44e-05	0.000879123	0	0	0	0	0	OtherIntergenic	NA
chr3	7574601	7575600	1kb_718	M_F_160	1000	15.77	6.09	Up	1.37	1.67e-05	0.000204672	Il7	NM_008371	-	7572076	7613426	Genebody	38325.5
chr3	17946701	17947700	1kb_721	M_F_161	1000	19.32	8.27	Up	1.22	1.86e-05	0.000224426	0	0	0	0	0	OtherIntergenic	NA
chr3	25416201	25425300	1kb_723	M_F_162	9100	242.07	38.48	Up	2.65	4.95e-11	3.82e-09	Nlgn1	NM_001163387	-	25330762	26052228	Genebody	631478
chr3	50819001	50820200	1kb_728	M_F_163	1200	16.32	5.48	Up	1.58	1.83e-06	2.83e-05	0	0	0	0	0	OtherIntergenic	NA
chr3	50845401	50846600	1kb_729	M_F_164	1200	18.61	8.25	Up	1.17	3.66e-05	0.000413922	0	0	0	0	0	OtherIntergenic	NA
chr3	66171001	66172000	1kb_732	M_F_165	1000	13.85	4.72	Up	1.55	7.2e-06	9.54e-05	0	0	0	0	0	OtherIntergenic	NA
chr3	66183501	66184500	1kb_733	M_F_166	1000	15.89	6.61	Up	1.27	5.46e-05	0.000591956	0	0	0	0	0	OtherIntergenic	NA
chr3	77713001	77714400	1kb_742	M_F_167	1400	17.29	5.37	Up	1.69	2.45e-07	4.84e-06	0	0	0	0	0	Genedesert	NA
chr3	100299401	100300400	1kb_775	M_F_168	1000	14.62	5.81	Up	1.33	5.06e-05	0.000552825	0	0	0	0	0	OtherIntergenic	NA
chr3	110495801	110497000	1kb_780	M_F_169	1200	16.95	7.17	Up	1.24	2.67e-05	0.00030913	0	0	0	0	0	Genedesert	NA
chr3	129066301	129067400	1kb_785	M_F_170	1100	15.71	4.85	Up	1.7	9.15e-07	1.54e-05	0	0	0	0	0	OtherIntergenic	NA
chr3	129099201	129100200	1kb_786	M_F_171	1000	17.68	6.38	Up	1.47	2.36e-05	0.000277087	0	0	0	0	0	OtherIntergenic	NA
chr3	132225501	132226500	1kb_788	M_F_172	1000	15.32	6.24	Up	1.3	5.4e-05	0.000585441	0	0	0	0	0	OtherIntergenic	NA
chr3	141125701	141126700	1kb_789	M_F_173	1000	16.16	6.22	Up	1.38	2.27e-05	0.000267088	Unc5c	NM_009472	+	141128527	141497885	Promoter3k	-2326.5
chr3	144953701	144954700	1kb_800	M_F_174	1000	13.87	4.71	Up	1.56	7.2e-06	9.54e-05	Col24a1	NM_027770	+	144955435	145214968	Promoter3k	-1234.5
chr3	156196701	156198000	1kb_804	M_F_175	1300	17.07	6.91	Up	1.3	2.01e-05	0.000240122	0	0	0	0	0	Genedesert	NA
chr4	44650501	44651600	1kb_839	M_F_176	1100	15.45	6.48	Up	1.25	8.5e-05	0.00088448	Pax5	NM_008782	-	44544377	44723311	Genebody	72260.5
chr4	44704201	44705200	1kb_840	M_F_177	1000	18.75	8.07	Up	1.22	2.66e-05	0.000308418	Pax5	NM_008782	-	44544377	44723311	Genebody	18610.5
chr4	47935101	47936100	1kb_845	M_F_178	1000	13.25	4.62	Up	1.52	1.62e-05	0.000198903	0	0	0	0	0	OtherIntergenic	NA
chr4	48599601	48600600	1kb_848	M_F_179	1000	19.08	8.9	Up	1.1	7.44e-05	0.0007818	Tmeff1	NM_021436	+	48598064	48676002	Promoter3k	2036.5
chr4	56059101	56060200	1kb_853	M_F_180	1100	17.04	7.13	Up	1.26	4.75e-05	0.00052217	0	0	0	0	0	Genedesert	NA
chr4	57648401	57649700	1kb_857	M_F_181	1300	21.6	9.35	Up	1.21	7.1e-06	9.41e-05	Palm2	NM_172868	+	57581153	57729999	Genebody	67897.5
chr4	87395001	87396100	1kb_869	M_F_182	1100	20.11	8.67	Up	1.21	1.64e-05	0.000200991	0	0	0	0	0	OtherIntergenic	NA
chr4	100538801	100540000	1kb_871	M_F_183	1200	18.89	8.14	Up	1.21	1.86e-05	0.000224426	Cachd1	NM_198037	+	100449283	100676352	Genebody	90117.5
chr4	102168701	102169800	1kb_873	M_F_184	1100	14.6	3.7	Up	1.98	1.47e-07	3.1e-06	Pde4b	NM_019840	+	101927543	102279866	Genebody	241708
chr4	103388901	103389900	1kb_875	M_F_185	1000	13.32	5.06	Up	1.4	6.88e-05	0.000727912	0	0	0	0	0	Genedesert	NA
chr4	103977001	103978100	1kb_876	M_F_186	1100	16.05	7.08	Up	1.18	0.000159025	0.00161136	0	0	0	0	0	Genedesert	NA
chr4	108111301	108112300	1kb_878	M_F_187	1000	15.7	2.65	Up	2.57	4.06e-10	2.13e-08	0	0	0	0	0	OtherIntergenic	NA
chr4	111287401	111288400	1kb_881	M_F_188	1000	13.47	4.55	Up	1.57	1.56e-05	0.000191444	Agbl4	NM_001048189	+	110070395	111330114	Genebody	1.21751e+06
chr4	114519201	114520200	1kb_882	M_F_189	1000	22.65	10.63	Up	1.09	7.84e-05	0.000820965	0	0	0	0	0	OtherIntergenic	NA
chr4	122783601	122784600	1kb_899	M_F_190	1000	18.33	8.01	Up	1.19	4.96e-05	0.000543114	Bmp8b	NM_007559	+	122782407	122803333	Promoter3k	1693.5
chr4	123715001	123716000	1kb_900	M_F_191	1000	15.45	6.24	Up	1.31	5.9e-05	0.000633899	0	0	0	0	0	OtherIntergenic	NA
chr4	124164101	124165300	1kb_901	M_F_192	1200	16.57	6.28	Up	1.4	6.91e-06	9.18e-05	0	0	0	0	0	OtherIntergenic	NA
chr4	128632801	128633800	1kb_902	M_F_193	1000	14.09	3.76	Up	1.91	3.62e-07	6.79e-06	Adc	NM_172875	-	128609389	128639660	Genebody	6359.5
chr4	138343401	138344400	1kb_908	M_F_194	1000	16.31	6.94	Up	1.23	6.46e-05	0.000690074	0	0	0	0	0	OtherIntergenic	NA
chr4	154524701	154526100	1kb_910	M_F_195	1400	18.41	7.1	Up	1.38	3.72e-06	5.3e-05	0	0	0	0	0	OtherIntergenic	NA
chr5	5690901	5691900	1kb_911	M_F_196	1000	15.01	5.8	Up	1.37	2.59e-05	0.000300968	Steap2	NM_001103157	-	5664830	5694076	Promoter3k	2675.5
chr5	39545001	39546000	1kb_917	M_F_197	1000	17.97	7.62	Up	1.24	2.46e-05	0.000287784	0	0	0	0	0	OtherIntergenic	NA
chr5	49361601	49362600	1kb_928	M_F_198	1000	13.56	4.71	Up	1.53	1.56e-05	0.000191444	0	0	0	0	0	Genedesert	NA
chr5	99721101	99722100	1kb_937	M_F_199	1000	12.45	4.23	Up	1.56	2.71e-05	0.000313904	0	0	0	0	0	OtherIntergenic	NA
chr5	106862101	106863100	1kb_954	M_F_200	1000	16.13	6.7	Up	1.27	5.08e-05	0.000554906	0	0	0	0	0	OtherIntergenic	NA
chr5	122308601	122309600	1kb_961	M_F_201	1000	12.99	3.63	Up	1.84	1.34e-06	2.15e-05	0	0	0	0	0	OtherIntergenic	NA
chr5	127028001	127029000	1kb_984	M_F_202	1000	13.41	4.82	Up	1.47	4.72e-05	0.000518271	0	0	0	0	0	Genedesert	NA
chr5	132925701	132926700	1kb_987	M_F_203	1000	17.91	8.02	Up	1.16	8.29e-05	0.000864006	Auts2	NM_177047	-	131913551	133018212	Genebody	92011.5
chr6	12066401	12067400	1kb_993	M_F_204	1000	15.1	5.52	Up	1.45	8.8e-06	0.00011437	0	0	0	0	0	OtherIntergenic	NA
chr6	26409101	26410100	1kb_1003	M_F_205	1000	13.39	4.62	Up	1.53	1.62e-05	0.000198903	0	0	0	0	0	Genedesert	NA
chr6	29020701	29021700	1kb_1006	M_F_206	1000	14.97	5.53	Up	1.44	1.8e-05	0.00021725	Lep	NM_008493	+	29010220	29023875	Genebody	10980.5
chr6	37003501	37004500	1kb_1007	M_F_207	1000	16.4	7.12	Up	1.2	5.28e-05	0.000573932	Dgki	NM_001081206	-	36796021	37249975	Genebody	245974
chr6	37687101	37688100	1kb_1015	M_F_208	1000	13.09	3.27	Up	2	3.09e-07	5.89e-06	0	0	0	0	0	OtherIntergenic	NA
chr6	37694901	37695900	1kb_1016	M_F_209	1000	18.52	2.4	Up	2.95	1.06e-08	3.24e-07	0	0	0	0	0	OtherIntergenic	NA
chr6	37702901	37703900	1kb_1017	M_F_210	1000	14.31	2.17	Up	2.72	3.03e-10	1.67e-08	0	0	0	0	0	OtherIntergenic	NA
chr6	53028001	53029000	1kb_1030	M_F_211	1000	17.16	7.28	Up	1.24	9.02e-05	0.00093179	0	0	0	0	0	OtherIntergenic	NA
chr6	65559701	65560700	1kb_1032	M_F_212	1000	13.89	5.3	Up	1.39	4.46e-05	0.000493813	Tnip3	NM_001001495	+	65540391	65584033	Genebody	19809.5
chr6	77926201	77927200	1kb_1033	M_F_213	1000	14.98	5.75	Up	1.38	5.94e-05	0.000638547	Ctnna2	NM_001109764	-	76831630	77929660	Promoter3k	2959.5
chr6	86745501	86746500	1kb_1037	M_F_214	1000	14.79	5.93	Up	1.32	7.17e-05	0.000755353	Anxa4	NM_013471	-	86686833	86743577	Promoter3k	-2423.5
chr6	115386601	115387700	1kb_1050	M_F_215	1100	17.44	3.82	Up	2.19	2.63e-09	9.98e-08	Pparg	NM_011146	+	115372083	115440418	Genebody	15067.5
chr6	115423201	115424700	1kb_1052	M_F_216	1500	20.63	5.62	Up	1.88	1.8e-09	7.24e-08	Pparg	NM_011146	+	115372083	115440418	Genebody	51867.5
chr6	115484401	115485400	1kb_1054	M_F_217	1000	13.07	4.85	Up	1.43	5.01e-05	0.000548335	0	0	0	0	0	OtherIntergenic	NA
chr6	120569701	120570700	1kb_1055	M_F_218	1000	14.51	5.53	Up	1.39	1.9e-05	0.00022821	0	0	0	0	0	OtherIntergenic	NA
chr6	127988001	127989000	1kb_1057	M_F_219	1000	21.42	8.33	Up	1.36	2.6e-05	0.000301625	Tspan9	NM_175414	-	127911417	128093595	Genebody	105094
chr6	131358201	131359300	1kb_1059	M_F_220	1100	22.06	10.95	Up	1.01	6.79e-05	0.000720163	0	0	0	0	0	OtherIntergenic	NA
chr6	135723901	135725300	1kb_1060	M_F_221	1400	17.24	7.35	Up	1.23	2.06e-05	0.000245817	Grin2b	NM_008171	-	135679822	136123528	Genebody	398928
chr6	137156601	137157700	1kb_1061	M_F_222	1100	16.96	7.25	Up	1.23	3.89e-05	0.00043613	0	0	0	0	0	OtherIntergenic	NA
chr6	141743901	141745000	1kb_1062	M_F_223	1100	14.73	3.76	Up	1.97	1.47e-07	3.11e-06	0	0	0	0	0	OtherIntergenic	NA
chr7	26656601	26657600	1kb_1071	M_F_224	1000	14.83	4.64	Up	1.67	1.56e-06	2.47e-05	0	0	0	0	0	OtherIntergenic	NA
chr7	26708401	26709800	1kb_1075	M_F_225	1400	21	3.08	Up	2.77	4.73e-12	5.96e-10	Cyp2b10	NM_009999	+	26682682	26711642	Genebody	26418.5
chr7	26722701	26724000	1kb_1076	M_F_226	1300	20.75	3.53	Up	2.56	1.29e-11	1.28e-09	0	0	0	0	0	OtherIntergenic	NA
chr7	27205501	27206600	1kb_1089	M_F_227	1100	16.1	4.63	Up	1.8	3.74e-07	6.99e-06	0	0	0	0	0	OtherIntergenic	NA
chr7	75035801	75036800	1kb_1093	M_F_228	1000	15.53	6.09	Up	1.35	2.32e-05	0.000272625	0	0	0	0	0	OtherIntergenic	NA
chr7	99892901	99893900	1kb_1098	M_F_229	1000	14.91	5.74	Up	1.38	2.59e-05	0.000300968	Rab30	NM_029494	+	99890223	99985626	Genebody	3177.5
chr7	104446301	104447400	1kb_1103	M_F_230	1100	20.44	9.11	Up	1.17	9.62e-06	0.000123432	Gab2	NM_010248	+	104230260	104457460	Genebody	216590
chr7	106931001	106932000	1kb_1105	M_F_231	1000	14.05	5.15	Up	1.45	6.75e-05	0.00071655	0	0	0	0	0	OtherIntergenic	NA
chr7	119804101	119805600	1kb_1113	M_F_232	1500	20.5	9.25	Up	1.15	0.000400432	0.00404692	0	0	0	0	0	OtherIntergenic	NA
chr7	128941901	128942900	1kb_1124	M_F_233	1000	13.66	5.14	Up	1.41	3.23e-05	0.000368547	0	0	0	0	0	OtherIntergenic	NA
chr7	136473901	136474900	1kb_1132	M_F_234	1000	13.98	3.78	Up	1.89	4.08e-07	7.54e-06	Ppapdc1a	NM_001080963	+	136400607	136534820	Genebody	73793.5
chr7	144383701	144384700	1kb_1143	M_F_235	1000	18.04	7.75	Up	1.22	3.4e-05	0.000386196	0	0	0	0	0	OtherIntergenic	NA
chr7	147393901	147394900	1kb_1149	M_F_236	1000	14.41	5.73	Up	1.33	5.42e-05	0.000587281	0	0	0	0	0	OtherIntergenic	NA
chr7	150531501	150532500	1kb_1158	M_F_237	1000	13.39	4.42	Up	1.6	4.87e-06	6.74e-05	Kcnq1	NM_008434	+	150293158	150612946	Genebody	238842
chr8	3664201	3665300	1kb_1162	M_F_238	1100	16.94	6.42	Up	1.4	9.2e-06	0.000118794	1810033B17Rik	NM_026985	+	3665761	3668904	Promoter3k	-1010.5
chr8	11064801	11065900	1kb_1163	M_F_239	1100	16.48	4.42	Up	1.9	6.6e-08	1.56e-06	0	0	0	0	0	OtherIntergenic	NA
chr8	11071601	11072800	1kb_1164	M_F_240	1200	22.22	8.47	Up	1.39	2.47e-06	3.7e-05	0	0	0	0	0	OtherIntergenic	NA
chr8	11089901	11090900	1kb_1165	M_F_241	1000	13.51	5.28	Up	1.36	9.31e-05	0.000957517	0	0	0	0	0	OtherIntergenic	NA
chr8	11174001	11175200	1kb_1172	M_F_242	1200	17.83	7.94	Up	1.17	4.96e-05	0.000543114	0	0	0	0	0	OtherIntergenic	NA
chr8	13493101	13494100	1kb_1173	M_F_243	1000	15.56	5.93	Up	1.39	1.94e-05	0.000232161	Gas6	NM_019521	-	13465373	13494534	Promoter1k	933.5
chr8	27365501	27366500	1kb_1175	M_F_244	1000	15.44	5.28	Up	1.55	6.06e-06	8.19e-05	0	0	0	0	0	OtherIntergenic	NA
chr8	27857601	27858600	1kb_1176	M_F_245	1000	16.47	5.57	Up	1.56	2.01e-05	0.000240317	0	0	0	0	0	OtherIntergenic	NA
chr8	33211101	33212100	1kb_1177	M_F_246	1000	15.96	5.83	Up	1.45	6.55e-06	8.77e-05	0	0	0	0	0	Genedesert	NA
chr8	71045501	71046600	1kb_1181	M_F_247	1100	17.2	6.66	Up	1.37	7.25e-06	9.59e-05	Csgalnact1	NM_172753	-	70880681	71259040	Genebody	212990
chr8	94530101	94531100	1kb_1258	M_F_248	1000	13.36	3.27	Up	2.03	3.29e-07	6.25e-06	0	0	0	0	0	OtherIntergenic	NA
chr8	94638201	94639400	1kb_1264	M_F_249	1200	24.13	10.42	Up	1.21	5.74e-05	0.000617861	0	0	0	0	0	OtherIntergenic	NA
chr8	109732101	109733300	1kb_1266	M_F_250	1200	15.9	6.65	Up	1.26	5.46e-05	0.000591956	0	0	0	0	0	OtherIntergenic	NA
chr8	123426101	123427100	1kb_1268	M_F_251	1000	16.68	6.1	Up	1.45	6.42e-05	0.000685632	0	0	0	0	0	OtherIntergenic	NA
chr9	37061801	37062800	1kb_1291	M_F_252	1000	15.37	4.93	Up	1.64	1.16e-05	0.000146402	Slc37a2	NM_020258	-	37036733	37063322	Promoter3k	1021.5
chr9	49546801	49547800	1kb_1300	M_F_253	1000	16.59	6.39	Up	1.38	3.5e-05	0.0003971	Ncam1	NM_010875	-	49323243	49607173	Genebody	59872.5
chr9	49618901	49620000	1kb_1301	M_F_254	1100	19.06	8.26	Up	1.21	1.86e-05	0.000224426	0	0	0	0	0	OtherIntergenic	NA
chr9	56596101	56597100	1kb_1303	M_F_255	1000	5.08	14.29	Down	-1.49	1.94e-05	0.000232161	0	0	0	0	0	OtherIntergenic	NA
chr9	59565001	59566000	1kb_1305	M_F_256	1000	18.11	7.84	Up	1.21	3.4e-05	0.000386196	0	0	0	0	0	OtherIntergenic	NA
chr9	61136101	61137400	1kb_1307	M_F_257	1300	22.48	10.18	Up	1.14	1.11e-05	0.000140295	0	0	0	0	0	OtherIntergenic	NA
chr9	62437401	62438500	1kb_1310	M_F_258	1100	14.2	5.13	Up	1.47	1.74e-05	0.00021106	0	0	0	0	0	OtherIntergenic	NA
chr9	69820001	69821100	1kb_1311	M_F_259	1100	20.52	9.99	Up	1.04	7.93e-05	0.000828778	0	0	0	0	0	OtherIntergenic	NA
chr9	71104201	71105200	1kb_1312	M_F_260	1000	13.6	5.36	Up	1.34	9.31e-05	0.000957517	Aldh1a2	NM_009022	+	71063595	71144049	Genebody	41105.5
chr9	106815801	106816900	1kb_1328	M_F_261	1100	16.8	7.17	Up	1.23	4.56e-05	0.00050417	Dock3	NM_153413	-	106795155	107134239	Genebody	317888
chr9	107131601	107132600	1kb_1329	M_F_262	1000	20.62	9.93	Up	1.05	9.05e-05	0.00093474	Dock3	NM_153413	-	106795155	107134239	Promoter3k	2138.5
chr9	120207301	120208400	1kb_1332	M_F_263	1100	14.31	5.27	Up	1.44	2.48e-05	0.000289953	0	0	0	0	0	OtherIntergenic	NA
chr1	33812201	33814200	2kb_4	M_F_264	2000	26.73	12.12	Up	1.14	2.07e-06	2.23e-05	Bag2	NM_145392	-	33802328	33814594	Promoter3k	1393.5
chr1	62092601	62094800	2kb_9	M_F_265	2200	25.65	12.36	Up	1.05	1.64e-05	0.0001649	Pard3b	NM_001081050	+	61685397	62688857	Genebody	408304
chr1	76849201	76851400	2kb_16	M_F_266	2200	26.28	10.8	Up	1.28	9.79e-08	1.19e-06	0	0	0	0	0	Genedesert	NA
chr1	92286201	92288200	2kb_23	M_F_267	2000	25.49	11.99	Up	1.09	1.45e-05	0.000147092	0	0	0	0	0	OtherIntergenic	NA
chr1	145327601	145329600	2kb_27	M_F_268	2000	23.83	9.38	Up	1.35	3.34e-07	3.84e-06	0	0	0	0	0	Genedesert	NA
chr1	145334201	145336200	2kb_28	M_F_269	2000	23.5	9.74	Up	1.27	8.78e-07	9.74e-06	0	0	0	0	0	Genedesert	NA
chr1	164832001	164834400	2kb_41	M_F_270	2400	30.17	13.41	Up	1.17	5.25e-07	5.94e-06	0	0	0	0	0	OtherIntergenic	NA
chr1	164887201	164889200	2kb_42	M_F_271	2000	28.21	3.14	Up	3.17	4.57e-10	8.45e-09	Fmo3	NM_008030	-	164883930	164914621	Genebody	26420.5
chr1	170399001	170401000	2kb_47	M_F_272	2000	25.26	11.94	Up	1.08	4.94e-06	5.17e-05	0	0	0	0	0	Genedesert	NA
chr1	170424801	170426800	2kb_50	M_F_273	2000	27.24	12.99	Up	1.07	6.55e-06	6.8e-05	0	0	0	0	0	Genedesert	NA
chr1	183944001	183946000	2kb_53	M_F_274	2000	25.76	12.29	Up	1.07	1.18e-05	0.000120766	Enah	NM_001083121	-	183834575	183950110	Genebody	5109.5
chr10	33489401	33492200	2kb_79	M_F_275	2800	36.24	10.7	Up	1.76	4.31e-11	1.08e-09	Gm4794	NM_001101452	-	33486229	33501920	Genebody	11119.5
chr10	88043601	88045800	2kb_95	M_F_276	2200	29.63	13.77	Up	1.11	3.46e-06	3.66e-05	Mybpc1	NM_175418	-	87981028	88067896	Genebody	23195.5
chr11	59352401	59354600	2kb_152	M_F_277	2200	26.57	12.96	Up	1.04	1.26e-05	0.000127796	Nlrp3	NM_145827	+	59356187	59380457	Promoter3k	-2686.5
chr11	59438001	59440000	2kb_153	M_F_278	2000	27.25	12.75	Up	1.1	2.94e-05	0.000290756	0	0	0	0	0	OtherIntergenic	NA
chr11	66577201	66579200	2kb_166	M_F_279	2000	25.12	10.92	Up	1.2	1.55e-06	1.69e-05	0	0	0	0	0	OtherIntergenic	NA
chr11	84493001	84495600	2kb_169	M_F_280	2600	13.57	28.19	Down	-1.06	2.28e-05	0.000227631	0	0	0	0	0	OtherIntergenic	NA
chr13	24031401	24033400	2kb_259	M_F_281	2000	24.02	10.01	Up	1.26	9.82e-07	1.09e-05	0	0	0	0	0	OtherIntergenic	NA
chr13	28830601	28832600	2kb_264	M_F_282	2000	25.74	11.18	Up	1.2	1.15e-06	1.26e-05	0	0	0	0	0	OtherIntergenic	NA
chr13	32751601	32753600	2kb_268	M_F_283	2000	23.79	11.59	Up	1.04	4.56e-05	0.000443552	0	0	0	0	0	OtherIntergenic	NA
chr13	53704801	53706800	2kb_283	M_F_284	2000	23.99	11.5	Up	1.06	3.03e-05	0.000299085	0	0	0	0	0	OtherIntergenic	NA
chr14	45671801	45673800	2kb_311	M_F_285	2000	24.99	11.48	Up	1.12	2.91e-06	3.09e-05	0	0	0	0	0	OtherIntergenic	NA
chr14	58842401	58844800	2kb_327	M_F_286	2400	27.97	11.63	Up	1.27	9.65e-08	1.17e-06	0	0	0	0	0	Genedesert	NA
chr15	67895401	67897400	2kb_373	M_F_287	2000	25.67	12.73	Up	1.01	2.98e-05	0.000293917	0	0	0	0	0	OtherIntergenic	NA
chr15	81817001	81819400	2kb_378	M_F_288	2400	35.46	17.39	Up	1.03	3.19e-06	3.38e-05	0	0	0	0	0	OtherIntergenic	NA
chr15	94199201	94201200	2kb_387	M_F_289	2000	24.2	10.97	Up	1.14	4.93e-06	5.16e-05	Adamts20	NM_001164786	-	94181862	94234780	Genebody	34579.5
chr16	56868001	56870000	2kb_411	M_F_290	2000	24.96	9.66	Up	1.37	7.1e-08	8.77e-07	Tmem45a	NM_019631	-	56805273	56886275	Genebody	17274.5
chr16	93576801	93578800	2kb_433	M_F_291	2000	26.43	13.16	Up	1.01	2.64e-05	0.00026212	0	0	0	0	0	OtherIntergenic	NA
chr18	10416201	10419000	2kb_474	M_F_292	2800	32.9	8.22	Up	2	5.66e-10	1.03e-08	Greb1l	NM_001083628	+	10325176	10562938	Genebody	92424.5
chr18	38943601	38945600	2kb_486	M_F_293	2000	23.39	9.96	Up	1.23	2.82e-06	3.01e-05	0	0	0	0	0	OtherIntergenic	NA
chr18	43577001	43579000	2kb_493	M_F_294	2000	24.05	10.66	Up	1.17	2.35e-06	2.52e-05	0	0	0	0	0	OtherIntergenic	NA
chr18	46349001	46351000	2kb_494	M_F_295	2000	26.28	12.95	Up	1.02	2.96e-05	0.000291985	Trim36	NM_001170855	-	46324955	46358471	Genebody	8470.5
chr18	57890401	57892400	2kb_498	M_F_296	2000	25.72	11.93	Up	1.11	5.5e-05	0.00053057	1700011I03Rik	NM_029290	+	57693479	57890718	Genebody	197922
chr19	14315801	14318000	2kb_520	M_F_297	2200	27.07	12.32	Up	1.14	2.32e-06	2.5e-05	0	0	0	0	0	OtherIntergenic	NA
chr19	17624601	17626600	2kb_522	M_F_298	2000	23.34	11.16	Up	1.06	2.27e-05	0.00022661	0	0	0	0	0	OtherIntergenic	NA
chr19	18079801	18081800	2kb_524	M_F_299	2000	23.12	8.45	Up	1.45	8.42e-08	1.03e-06	0	0	0	0	0	OtherIntergenic	NA
chr19	25296801	25298800	2kb_529	M_F_300	2000	23.23	10.45	Up	1.15	5.75e-06	5.98e-05	0	0	0	0	0	OtherIntergenic	NA
chr19	34120401	34122800	2kb_545	M_F_301	2400	29.66	14.57	Up	1.03	7.35e-06	7.6e-05	Lipk	NM_172837	+	34082779	34122286	Genebody	38821.5
chr19	34161801	34163800	2kb_546	M_F_302	2000	27.13	12.29	Up	1.14	3.98e-05	0.000388716	0	0	0	0	0	OtherIntergenic	NA
chr2	50229801	50231800	2kb_578	M_F_303	2000	27.43	10.46	Up	1.39	9.66e-09	1.34e-07	0	0	0	0	0	OtherIntergenic	NA
chr2	59439801	59442600	2kb_582	M_F_304	2800	33.41	16.5	Up	1.02	2.23e-05	0.000222474	0	0	0	0	0	OtherIntergenic	NA
chr2	90969401	90971400	2kb_595	M_F_305	2000	23.18	11.1	Up	1.06	5.75e-05	0.000553774	Mybpc3	NM_008653	+	90958300	90976672	Genebody	12100.5
chr2	101847401	101850000	2kb_596	M_F_306	2600	34.27	16.16	Up	1.08	1.11e-06	1.22e-05	Ldlrad3	NM_178886	-	101790357	102026533	Genebody	177832
chr2	115038401	115040400	2kb_606	M_F_307	2000	24.31	11.27	Up	1.11	1.38e-05	0.000139918	0	0	0	0	0	OtherIntergenic	NA
chr2	118051001	118053200	2kb_607	M_F_308	2200	30.81	14.84	Up	1.05	2.12e-06	2.28e-05	Fsip1	NM_027759	-	118030623	118082689	Genebody	30588.5
chr2	142781601	142783800	2kb_620	M_F_309	2200	29.42	14.12	Up	1.06	5.64e-06	5.88e-05	0	0	0	0	0	OtherIntergenic	NA
chr2	151827201	151829400	2kb_626	M_F_310	2200	25.36	11.91	Up	1.09	5.74e-06	5.98e-05	2310046K01Rik	NM_001164820	+	151825601	151834992	Promoter3k	2699.5
chr3	99114601	99116600	2kb_670	M_F_311	2000	23.93	11.32	Up	1.08	1.58e-05	0.000159456	Tbx15	NM_009323	+	99057682	99158182	Genebody	57918.5
chr3	119239801	119241800	2kb_677	M_F_312	2000	24.54	7.86	Up	1.64	1.07e-07	1.3e-06	0	0	0	0	0	OtherIntergenic	NA
chr4	68585801	68588000	2kb_740	M_F_313	2200	26.43	12.74	Up	1.05	1.13e-05	0.000115241	Dbc1	NM_019967	-	68422405	68615430	Genebody	28529.5
chr4	71288401	71290400	2kb_743	M_F_314	2000	25.52	11.25	Up	1.18	2.03e-05	0.000203484	0	0	0	0	0	Genedesert	NA
chr4	102163401	102165400	2kb_752	M_F_315	2000	24.15	8.21	Up	1.56	1.35e-08	1.82e-07	Pde4b	NM_019840	+	101927543	102279866	Genebody	236858
chr4	132769801	132771800	2kb_772	M_F_316	2000	26.71	12.29	Up	1.12	3.29e-06	3.48e-05	Gpr3	NM_008154	-	132765254	132768450	Promoter3k	-2350.5
chr4	139949201	139951400	2kb_776	M_F_317	2200	29.14	14.36	Up	1.02	1.18e-05	0.000120329	0	0	0	0	0	OtherIntergenic	NA
chr4	154616001	154618000	2kb_778	M_F_318	2000	23.81	11.34	Up	1.07	2.53e-05	0.000251365	0	0	0	0	0	OtherIntergenic	NA
chr5	44201401	44203400	2kb_787	M_F_319	2000	29.71	12.33	Up	1.27	4.15e-06	4.36e-05	0	0	0	0	0	OtherIntergenic	NA
chr5	49757201	49759200	2kb_792	M_F_320	2000	26.32	12.11	Up	1.12	8.69e-05	0.000821792	0	0	0	0	0	Genedesert	NA
chr5	67018201	67020400	2kb_793	M_F_321	2200	28.63	13.86	Up	1.05	9.64e-06	9.89e-05	0	0	0	0	0	OtherIntergenic	NA
chr5	97390401	97393200	2kb_805	M_F_322	2800	36.5	17.69	Up	1.05	5.5e-06	5.73e-05	0	0	0	0	0	OtherIntergenic	NA
chr5	102860601	102863600	2kb_814	M_F_323	3000	38.23	15.98	Up	1.26	7.11e-09	1.01e-07	0	0	0	0	0	OtherIntergenic	NA
chr5	104365801	104367800	2kb_815	M_F_324	2000	26.56	13.2	Up	1.01	4.1e-05	0.00039971	0	0	0	0	0	OtherIntergenic	NA
chr5	121953401	121955400	2kb_829	M_F_325	2000	22.89	11.33	Up	1.02	7.51e-05	0.000714759	Adam1b	NM_172125	-	121950105	121952988	Promoter3k	-1412.5
chr6	17129601	17131600	2kb_855	M_F_326	2000	24.04	8.59	Up	1.48	1.09e-08	1.5e-07	0	0	0	0	0	OtherIntergenic	NA
chr6	50634801	50636800	2kb_873	M_F_327	2000	26.22	12.92	Up	1.02	1.74e-05	0.000174941	0	0	0	0	0	OtherIntergenic	NA
chr6	84464201	84466200	2kb_883	M_F_328	2000	25.58	12.68	Up	1.01	2.98e-05	0.000293917	0	0	0	0	0	OtherIntergenic	NA
chr6	93271601	93273800	2kb_886	M_F_329	2200	29.81	13.82	Up	1.11	2.48e-06	2.65e-05	0	0	0	0	0	OtherIntergenic	NA
chr6	128426601	128428800	2kb_901	M_F_330	2200	30	12.99	Up	1.21	1.98e-07	2.33e-06	Gm10069	NR_028593	+	128388774	128453297	Genebody	38926.5
chr7	26705201	26707200	2kb_913	M_F_331	2000	25.5	4.95	Up	2.37	2.57e-12	1.27e-10	Cyp2b10	NM_009999	+	26682682	26711642	Genebody	23518.5
chr7	26729401	26731400	2kb_914	M_F_332	2000	26.54	6.44	Up	2.04	3.72e-12	1.61e-10	0	0	0	0	0	OtherIntergenic	NA
chr7	119886401	119889000	2kb_955	M_F_333	2600	36.29	17.86	Up	1.02	1.66e-06	1.8e-05	Tead1	NM_001166584	+	119822833	120050316	Genebody	64867.5
chr7	142718201	142720200	2kb_977	M_F_334	2000	24.75	11.58	Up	1.1	6.7e-06	6.94e-05	Clrn3	NM_178669	-	142703138	142720336	Promoter3k	1135.5
chr8	7060001	7062000	2kb_1000	M_F_335	2000	33.37	16.54	Up	1.01	1.37e-05	0.000139503	0	0	0	0	0	Genedesert	NA
chr8	85283001	85285000	2kb_1018	M_F_336	2000	25.45	11.72	Up	1.12	3.55e-05	0.000348221	0	0	0	0	0	OtherIntergenic	NA
chr8	87228001	87230000	2kb_1019	M_F_337	2000	10.76	26.31	Down	-1.29	8.18e-05	0.000775436	Lyl1	NM_008535	+	87225355	87228614	Genebody	3645.5
chr8	91567601	91570200	2kb_1025	M_F_338	2600	35.23	16	Up	1.14	4.03e-06	4.24e-05	Sall1	NM_021390	-	91551142	91568060	Promoter1k	-840.5
chr8	111981201	111983200	2kb_1078	M_F_339	2000	24.95	11.69	Up	1.09	6.51e-06	6.75e-05	0	0	0	0	0	OtherIntergenic	NA
chr8	127592601	127594800	2kb_1083	M_F_340	2200	26.53	11.38	Up	1.22	4.59e-07	5.21e-06	Disc1	NM_174854	+	127578094	127785050	Genebody	15606.5
chr9	22801601	22803800	2kb_1086	M_F_341	2200	27.49	12.24	Up	1.17	1.64e-06	1.78e-05	0	0	0	0	0	OtherIntergenic	NA
chr9	42490401	42492400	2kb_1102	M_F_342	2000	26.58	13.13	Up	1.02	2.64e-05	0.00026212	Grik4	NM_175481	-	42328518	42752453	Genebody	261052
chr9	43256401	43259000	2kb_1109	M_F_343	2600	33.7	15.26	Up	1.14	4.14e-07	4.72e-06	0	0	0	0	0	OtherIntergenic	NA
chr9	73705401	73707600	2kb_1117	M_F_344	2200	26.08	12.43	Up	1.07	1.02e-05	0.000104151	Unc13c	NM_001081153	-	73327230	73781373	Genebody	74872.5
chr9	105983601	105985600	2kb_1127	M_F_345	2000	25.66	9.98	Up	1.36	1.95e-05	0.000195437	Dvwa	NM_026763	-	105892649	105999021	Genebody	14420.5
chr2	63694001	63699500	5kb_514	M_F_346	5500	62.14	28.84	Up	1.11	1.37e-05	0.000139856	0	0	0	0	0	OtherIntergenic	NA
chr1	81572801	81574800	2kb_22	M_F_347	2000	30.14	13.27	Up	1.18	4.11e-05	0.00040016	0	0	0	0	0	OtherIntergenic	NA
chr1	145341801	145343800	2kb_29	M_F_348	2000	26.86	6.47	Up	2.05	5.49e-09	7.97e-08	0	0	0	0	0	Genedesert	NA
chr1	145422601	145425000	2kb_35	M_F_349	2400	33.59	15	Up	1.16	1.74e-07	2.06e-06	0	0	0	0	0	Genedesert	NA
chr1	164984601	164987000	2kb_44	M_F_350	2400	32.87	8.11	Up	2.02	3.51e-10	6.67e-09	4921528O07Rik	NM_030071	-	164954432	165015800	Genebody	29999.5
chr1	164990201	164993000	2kb_45	M_F_351	2800	34.27	14.53	Up	1.24	6.92e-08	8.55e-07	4921528O07Rik	NM_030071	-	164954432	165015800	Genebody	24199.5
chr1	189801001	189803000	2kb_62	M_F_352	2000	26.39	10.03	Up	1.4	3.43e-08	4.37e-07	0	0	0	0	0	OtherIntergenic	NA
chr10	22491001	22493000	2kb_72	M_F_353	2000	25.58	10	Up	1.35	6.94e-08	8.59e-07	0	0	0	0	0	OtherIntergenic	NA
chr10	22745601	22748400	2kb_75	M_F_354	2800	31.8	15.32	Up	1.05	4.8e-06	5.03e-05	0	0	0	0	0	OtherIntergenic	NA
chr10	24847201	24850000	2kb_76	M_F_355	2800	41.42	18.24	Up	1.18	1.68e-08	2.23e-07	0	0	0	0	0	OtherIntergenic	NA
chr10	33519401	33521800	2kb_82	M_F_356	2400	25.31	6.96	Up	1.86	6.03e-11	1.44e-09	0	0	0	0	0	OtherIntergenic	NA
chr10	106464201	106466600	2kb_104	M_F_357	2400	34.51	8.69	Up	1.99	2.47e-08	3.21e-07	Acss3	NM_198636	-	106402137	106560719	Genebody	95318.5
chr10	107375201	107377400	2kb_106	M_F_358	2200	29.92	12.54	Up	1.25	2.22e-07	2.6e-06	0	0	0	0	0	OtherIntergenic	NA
chr10	123653201	123656000	2kb_109	M_F_359	2800	33.05	11.51	Up	1.52	3.94e-09	5.88e-08	0	0	0	0	0	OtherIntergenic	NA
chr11	43841201	43843200	2kb_146	M_F_360	2000	26.18	12.55	Up	1.06	1.02e-05	0.000104151	0	0	0	0	0	OtherIntergenic	NA
chr11	76995001	76997600	2kb_167	M_F_361	2600	34.64	14.71	Up	1.24	2.44e-07	2.85e-06	Efcab5	NM_176965	-	76903416	77002469	Genebody	6168.5
chr11	103917201	103919200	2kb_173	M_F_362	2000	26.82	13.03	Up	1.04	5.65e-05	0.000544755	0	0	0	0	0	OtherIntergenic	NA
chr11	108128001	108130000	2kb_179	M_F_363	2000	24.33	8.73	Up	1.48	1.66e-08	2.2e-07	Prkca	NM_011101	-	107794700	108205201	Genebody	76200.5
chr12	52045201	52047400	2kb_217	M_F_364	2200	30.97	15.3	Up	1.02	8.51e-06	8.76e-05	0	0	0	0	0	OtherIntergenic	NA
chr12	55480201	55483400	2kb_218	M_F_365	3200	34.87	14.46	Up	1.27	1.15e-08	1.57e-07	0	0	0	0	0	OtherIntergenic	NA
chr12	84222401	84224600	2kb_238	M_F_366	2200	31.71	14.98	Up	1.08	1.51e-06	1.64e-05	Rgs6	NM_015812	+	83718024	84259798	Genebody	505476
chr12	118790801	118793000	2kb_253	M_F_367	2200	29.68	12.66	Up	1.23	7.72e-07	8.6e-06	Rapgef5	NM_175930	+	118754951	118995450	Genebody	36949.5
chr13	24576601	24578600	2kb_260	M_F_368	2000	28.15	13.97	Up	1.01	1.33e-05	0.000135207	0	0	0	0	0	OtherIntergenic	NA
chr13	46445001	46447400	2kb_282	M_F_369	2400	32.9	15.55	Up	1.08	1.39e-06	1.52e-05	0	0	0	0	0	OtherIntergenic	NA
chr13	94323001	94325000	2kb_288	M_F_370	2000	26.88	12.71	Up	1.08	4.04e-05	0.00039448	0	0	0	0	0	OtherIntergenic	NA
chr13	109497801	109500400	2kb_296	M_F_371	2600	32.92	16.39	Up	1.01	8.31e-06	8.56e-05	Pde4d	NM_011056	+	109444370	110741681	Genebody	54730.5
chr13	109510801	109514600	2kb_297	M_F_372	3800	51.36	22.61	Up	1.18	1.27e-08	1.72e-07	Pde4d	NM_011056	+	109444370	110741681	Genebody	68330.5
chr14	45654801	45657400	2kb_310	M_F_373	2600	34.6	15.63	Up	1.15	1.07e-07	1.29e-06	0	0	0	0	0	OtherIntergenic	NA
chr14	51673601	51675600	2kb_315	M_F_374	2000	25.44	11.93	Up	1.09	1.45e-05	0.000147092	0	0	0	0	0	OtherIntergenic	NA
chr14	87148601	87150600	2kb_331	M_F_375	2000	30.26	12.84	Up	1.24	7.39e-05	0.000703555	Diap3	NM_019670	-	87056129	87540920	Genebody	391320
chr14	106094801	106096800	2kb_334	M_F_376	2000	28.57	14	Up	1.03	1.46e-05	0.000148024	0	0	0	0	0	OtherIntergenic	NA
chr14	106181801	106183800	2kb_335	M_F_377	2000	26.5	11.8	Up	1.17	2.36e-06	2.53e-05	0	0	0	0	0	OtherIntergenic	NA
chr15	44689601	44692000	2kb_357	M_F_378	2400	28.74	13.64	Up	1.08	1.15e-05	0.000117523	0	0	0	0	0	OtherIntergenic	NA
chr15	65906401	65908400	2kb_367	M_F_379	2000	27.64	12.27	Up	1.17	3.49e-05	0.000342658	Kcnq3	NM_152923	-	65826477	66117785	Genebody	210384
chr15	93342201	93344800	2kb_385	M_F_380	2600	39.44	18.25	Up	1.11	5.65e-08	7.05e-07	Prickle1	NM_001033217	-	93329544	93426321	Genebody	82820.5
chr16	47205401	47207600	2kb_404	M_F_381	2200	33.02	7.9	Up	2.06	1.14e-08	1.56e-07	0	0	0	0	0	Genedesert	NA
chr16	56871801	56874400	2kb_412	M_F_382	2600	36.02	14.83	Up	1.28	3.05e-08	3.92e-07	Tmem45a	NM_019631	-	56805273	56886275	Genebody	13174.5
chr16	59854001	59856600	2kb_415	M_F_383	2600	34.15	13.28	Up	1.36	7.33e-09	1.04e-07	Epha6	NM_007938	-	59653308	60605356	Genebody	750056
chr17	15434601	15436800	2kb_439	M_F_384	2200	25.98	12.27	Up	1.08	1.18e-05	0.000120766	0	0	0	0	0	OtherIntergenic	NA
chr17	15438401	15440800	2kb_440	M_F_385	2400	25.52	12.41	Up	1.04	3.47e-05	0.000340914	0	0	0	0	0	OtherIntergenic	NA
chr17	15792801	15795200	2kb_451	M_F_386	2400	27.52	12.8	Up	1.1	2.63e-06	2.81e-05	0	0	0	0	0	OtherIntergenic	NA
chr17	45280001	45282200	2kb_463	M_F_387	2200	27.18	13.18	Up	1.04	1.25e-05	0.000127106	0	0	0	0	0	OtherIntergenic	NA
chr18	12007201	12009600	2kb_477	M_F_388	2400	29.87	10.78	Up	1.47	2.05e-09	3.26e-08	Cables1	NM_001146287	+	11997782	12104135	Genebody	10618.5
chr18	12594601	12596800	2kb_478	M_F_389	2200	26.63	12.9	Up	1.05	1.74e-05	0.000174941	Lama3	NM_010680	+	12492532	12741518	Genebody	103168
chr18	32744201	32746200	2kb_484	M_F_390	2000	28.64	10.94	Up	1.39	9.54e-09	1.33e-07	0	0	0	0	0	OtherIntergenic	NA
chr18	62932201	62934200	2kb_503	M_F_391	2000	26.91	13.39	Up	1.01	2.93e-05	0.000289854	0	0	0	0	0	OtherIntergenic	NA
chr18	64242001	64244400	2kb_508	M_F_392	2400	32.03	14.62	Up	1.13	2.87e-05	0.000284095	0	0	0	0	0	OtherIntergenic	NA
chr19	18379401	18383000	2kb_525	M_F_393	3600	42.39	18.1	Up	1.23	5.04e-09	7.36e-08	0	0	0	0	0	OtherIntergenic	NA
chr19	23987001	23989200	2kb_528	M_F_394	2200	31.29	14.98	Up	1.06	2.81e-06	3e-05	Apba1	NM_177034	+	23833365	24024086	Genebody	154736
chr19	27665601	27667600	2kb_537	M_F_395	2000	25.04	7.77	Up	1.69	9.85e-10	1.68e-08	0	0	0	0	0	OtherIntergenic	NA
chr2	7176001	7178000	2kb_570	M_F_396	2000	25.56	8.15	Up	1.65	4.02e-10	7.52e-09	Cugbp2	NM_001110232	-	6460743	7317626	Genebody	140626
chr2	67552201	67554200	2kb_587	M_F_397	2000	24.88	10.66	Up	1.22	1.07e-06	1.18e-05	0	0	0	0	0	OtherIntergenic	NA
chr2	81113801	81115800	2kb_594	M_F_398	2000	32.25	15.38	Up	1.07	1.26e-05	0.000127716	0	0	0	0	0	Genedesert	NA
chr2	104895201	104897200	2kb_598	M_F_399	2000	28.49	14.16	Up	1.01	2.12e-05	0.000211772	0	0	0	0	0	OtherIntergenic	NA
chr2	106505801	106507800	2kb_602	M_F_400	2000	26.67	13.24	Up	1.01	2.64e-05	0.00026212	0	0	0	0	0	OtherIntergenic	NA
chr2	127880001	127882200	2kb_613	M_F_401	2200	30.38	15.05	Up	1.01	1.24e-05	0.000126222	Acoxl	NM_028765	+	127680363	127949625	Genebody	200738
chr2	140613001	140615000	2kb_619	M_F_402	2000	26.84	12.3	Up	1.13	2.32e-06	2.5e-05	Macrod2	NM_001013802	+	140221165	142215785	Genebody	392836
chr3	69433001	69435200	2kb_645	M_F_403	2200	26.02	9.63	Up	1.43	8.88e-09	1.24e-07	0	0	0	0	0	OtherIntergenic	NA
chr3	69438201	69440800	2kb_646	M_F_404	2600	31.8	12.52	Up	1.34	6.88e-09	9.81e-08	0	0	0	0	0	OtherIntergenic	NA
chr3	69450401	69453400	2kb_647	M_F_405	3000	41.44	17.37	Up	1.25	2.58e-08	3.34e-07	0	0	0	0	0	OtherIntergenic	NA
chr3	70200801	70203000	2kb_649	M_F_406	2200	28.88	8.78	Up	1.72	1.02e-08	1.41e-07	0	0	0	0	0	Genedesert	NA
chr3	75230201	75232400	2kb_650	M_F_407	2200	24.84	10.87	Up	1.19	7.36e-05	0.000701308	0	0	0	0	0	OtherIntergenic	NA
chr3	98710001	98712200	2kb_657	M_F_408	2200	27.84	12.42	Up	1.16	8.1e-07	9.01e-06	0	0	0	0	0	OtherIntergenic	NA
chr3	110456601	110460200	2kb_672	M_F_409	3600	61.76	29.58	Up	1.06	6.26e-05	0.000601383	0	0	0	0	0	Genedesert	NA
chr3	129059201	129061600	2kb_682	M_F_410	2400	29.37	12.98	Up	1.18	2.89e-06	3.08e-05	0	0	0	0	0	OtherIntergenic	NA
chr3	131975401	131977600	2kb_683	M_F_411	2200	27.58	12.27	Up	1.17	1.15e-06	1.26e-05	0	0	0	0	0	OtherIntergenic	NA
chr3	142640001	142642600	2kb_689	M_F_412	2600	32.05	15.34	Up	1.06	3.75e-05	0.00036729	0	0	0	0	0	Genedesert	NA
chr4	63780801	63783400	2kb_739	M_F_413	2600	31.75	15.01	Up	1.08	1.51e-06	1.64e-05	0	0	0	0	0	Genedesert	NA
chr4	71183801	71187000	2kb_741	M_F_414	3200	40.54	17.5	Up	1.21	3.74e-09	5.61e-08	0	0	0	0	0	Genedesert	NA
chr4	72710001	72713000	2kb_748	M_F_415	3000	44.51	19.48	Up	1.19	8.5e-08	1.04e-06	0	0	0	0	0	Genedesert	NA
chr4	87439401	87442000	2kb_750	M_F_416	2600	34.65	14.48	Up	1.26	2.42e-08	3.14e-07	Mllt3	NM_029931	-	87415828	87452217	Genebody	11516.5
chr4	102326601	102328600	2kb_753	M_F_417	2000	26.83	8.2	Up	1.71	2.16e-09	3.41e-08	0	0	0	0	0	OtherIntergenic	NA
chr4	105082401	105084800	2kb_755	M_F_418	2400	35.39	17.08	Up	1.05	3.62e-06	3.82e-05	0	0	0	0	0	Genedesert	NA
chr4	108120801	108123400	2kb_756	M_F_419	2600	38.55	16.43	Up	1.23	5.12e-07	5.79e-06	0	0	0	0	0	OtherIntergenic	NA
chr4	122627401	122629600	2kb_767	M_F_420	2200	31.2	12.64	Up	1.3	4.54e-08	5.71e-07	Mfsd2a	NM_029662	-	122624097	122638430	Genebody	9929.5
chr5	88825801	88828000	2kb_803	M_F_421	2200	28.87	14.31	Up	1.01	1.61e-05	0.000162528	0	0	0	0	0	OtherIntergenic	NA
chr5	99688001	99690800	2kb_808	M_F_422	2800	37.92	16.55	Up	1.2	2.32e-07	2.71e-06	0	0	0	0	0	OtherIntergenic	NA
chr5	99762401	99765200	2kb_809	M_F_423	2800	34.17	15.38	Up	1.15	1.98e-07	2.33e-06	A930011G23Rik	NR_030692	-	99726262	100158078	Genebody	394278
chr6	12445201	12447400	2kb_850	M_F_424	2200	33.62	15.9	Up	1.08	2.62e-06	2.8e-05	Thsd7a	NM_001164805	-	12261609	12699252	Genebody	252952
chr6	37626201	37629200	2kb_862	M_F_425	3000	38.73	12.95	Up	1.58	2.11e-11	5.93e-10	0	0	0	0	0	OtherIntergenic	NA
chr6	115373601	115375800	2kb_897	M_F_426	2200	27.41	6.87	Up	2	7.84e-12	2.72e-10	Pparg	NM_011146	+	115372083	115440418	Promoter3k	2617.5
chr6	115427201	115429200	2kb_898	M_F_427	2000	26.1	8.81	Up	1.57	4.58e-09	6.75e-08	Pparg	NM_011146	+	115372083	115440418	Genebody	56117.5
chr7	14822801	14826200	2kb_909	M_F_428	3400	43.7	14.02	Up	1.64	5.71e-10	1.03e-08	Gm6957	NM_001081325	-	14807825	14840181	Genebody	15680.5
chr7	26764001	26766400	2kb_915	M_F_429	2400	31.22	6.19	Up	2.33	3.23e-10	6.2e-09	0	0	0	0	0	OtherIntergenic	NA
chr7	26875201	26877600	2kb_916	M_F_430	2400	25.94	1.57	Up	4.04	4.02e-14	6.59e-11	Cyp2b13	NM_007813	+	26846513	26881214	Genebody	29887.5
chr7	26878201	26881200	2kb_917	M_F_431	3000	34.81	2.95	Up	3.56	8.38e-14	6.59e-11	Cyp2b13	NM_007813	+	26846513	26881214	Genebody	33187.5
chr7	26972401	26975200	2kb_919	M_F_432	2800	35.99	5.14	Up	2.81	1.35e-13	6.59e-11	Cyp2b9	NM_010000	+	26958427	26995678	Genebody	15373.5
chr7	26986401	26988400	2kb_920	M_F_433	2000	30.94	1.34	Up	4.53	2.53e-10	5.01e-09	Cyp2b9	NM_010000	+	26958427	26995678	Genebody	28973.5
chr7	26991801	26994200	2kb_921	M_F_434	2400	31.49	1.97	Up	4	4.8e-14	6.59e-11	Cyp2b9	NM_010000	+	26958427	26995678	Genebody	34573.5
chr7	76059401	76061600	2kb_929	M_F_435	2200	24.92	10.75	Up	1.21	1.07e-06	1.18e-05	0	0	0	0	0	Genedesert	NA
chr7	119782801	119796600	2kb_946	M_F_436	13800	255.02	115.89	Up	1.14	2.09e-10	4.21e-09	0	0	0	0	0	OtherIntergenic	NA
chr7	119798001	119801800	2kb_947	M_F_437	3800	55.64	25.09	Up	1.15	1.29e-07	1.55e-06	0	0	0	0	0	OtherIntergenic	NA
chr7	119836601	119839000	2kb_954	M_F_438	2400	33.22	15.84	Up	1.07	4.04e-06	4.25e-05	Tead1	NM_001166584	+	119822833	120050316	Genebody	14967.5
chr8	45786001	45788600	2kb_1010	M_F_439	2600	30.8	14.99	Up	1.04	1.71e-05	0.000172381	0	0	0	0	0	Genedesert	NA
chr8	91642601	91646400	2kb_1026	M_F_440	3800	51.38	13.16	Up	1.97	2.05e-12	1.11e-10	0	0	0	0	0	Genedesert	NA
chr8	94493201	94495600	2kb_1071	M_F_441	2400	29.04	12.35	Up	1.23	3.47e-07	3.99e-06	0	0	0	0	0	OtherIntergenic	NA
chr8	96695201	96697200	2kb_1076	M_F_442	2000	24.26	9.36	Up	1.37	1.63e-07	1.94e-06	Mt2	NM_008630	+	96696517	96697466	Promoter1k	-316.5
chr9	23170001	23172000	2kb_1096	M_F_443	2000	26.29	8.47	Up	1.63	2.37e-09	3.71e-08	Bmper	NM_028472	+	23027519	23289645	Genebody	143482
chr9	23184601	23187600	2kb_1097	M_F_444	3000	40.34	12.1	Up	1.74	1.26e-12	8.89e-11	Bmper	NM_028472	+	23027519	23289645	Genebody	158582
chr9	88156201	88158200	2kb_1122	M_F_445	2000	26.35	11.7	Up	1.17	2.36e-06	2.53e-05	0	0	0	0	0	OtherIntergenic	NA
chr1	4655001	4661000	5kb_2	M_F_446	6000	64.65	30.33	Up	1.09	4.36e-07	4.64e-06	0	0	0	0	0	OtherIntergenic	NA
chr1	170309501	170317500	5kb_43	M_F_447	8000	90.09	37.66	Up	1.26	5.87e-10	8.31e-09	Pbx1	NM_183355	-	170083999	170362388	Genebody	48887.5
chr1	170418001	170423000	5kb_44	M_F_448	5000	67.36	31.04	Up	1.12	5.75e-09	6.95e-08	0	0	0	0	0	Genedesert	NA
chr10	99594001	99599000	5kb_86	M_F_449	5000	53.39	24.87	Up	1.1	3.09e-08	3.44e-07	0	0	0	0	0	OtherIntergenic	NA
chr10	106456001	106461000	5kb_90	M_F_450	5000	63.76	16.83	Up	1.92	9.06e-09	1.07e-07	Acss3	NM_198636	-	106402137	106560719	Genebody	102218
chr11	29491501	29498000	5kb_117	M_F_451	6500	63.8	29.8	Up	1.1	6.59e-11	1.22e-09	0	0	0	0	0	OtherIntergenic	NA
chr11	108391001	108396000	5kb_171	M_F_452	5000	59.28	28.79	Up	1.04	1.55e-08	1.78e-07	Ccdc46	NM_029606	+	108286579	108721928	Genebody	106922
chr12	80482001	80487000	5kb_203	M_F_453	5000	54.16	26.52	Up	1.03	2.44e-07	2.61e-06	Rad51l1	NM_009014	+	80398268	80915676	Genebody	86232.5
chr13	96386001	96391500	5kb_256	M_F_454	5500	26.28	61.18	Down	-1.22	5.78e-09	6.98e-08	F2r	NM_010169	-	96371743	96388387	Promoter1k	-363.5
chr14	50984001	50990000	5kb_279	M_F_455	6000	63.85	29.9	Up	1.09	1.61e-10	2.58e-09	0	0	0	0	0	OtherIntergenic	NA
chr15	83992001	83998000	5kb_328	M_F_456	6000	82.45	39.18	Up	1.07	1.86e-08	2.11e-07	0	0	0	0	0	OtherIntergenic	NA
chr15	92653501	92659000	5kb_335	M_F_457	5500	64.91	28.04	Up	1.21	1.94e-08	2.2e-07	0	0	0	0	0	OtherIntergenic	NA
chr15	96728001	96733500	5kb_337	M_F_458	5500	63.3	27.6	Up	1.2	5.07e-10	7.26e-09	0	0	0	0	0	OtherIntergenic	NA
chr15	96760001	96765000	5kb_339	M_F_459	5000	59.06	29.18	Up	1.02	4.87e-07	5.19e-06	0	0	0	0	0	OtherIntergenic	NA
chr18	43402501	43407500	5kb_424	M_F_460	5000	65.99	30.21	Up	1.13	2.11e-09	2.72e-08	Stk32a	NM_178749	+	43367350	43477134	Genebody	37650.5
chr19	7853501	7862000	5kb_445	M_F_461	8500	106.05	14.26	Up	2.89	4.75e-12	1.97e-10	BC014805	NM_146232	-	7856472	7877156	Genebody	19405.5
chr19	14325501	14335000	5kb_446	M_F_462	9500	99.22	45.07	Up	1.14	6.3e-12	2.27e-10	0	0	0	0	0	OtherIntergenic	NA
chr19	18439001	18444000	5kb_447	M_F_463	5000	62.59	28.97	Up	1.11	1.51e-09	1.98e-08	0	0	0	0	0	OtherIntergenic	NA
chr19	40004501	40010500	5kb_468	M_F_464	6000	75.06	27.61	Up	1.44	2.64e-11	5.98e-10	0	0	0	0	0	OtherIntergenic	NA
chr2	45313501	45319500	5kb_502	M_F_465	6000	64.63	26.01	Up	1.31	1.25e-10	2.07e-09	0	0	0	0	0	Genedesert	NA
chr2	63705001	63710500	5kb_515	M_F_466	5500	62.74	29.46	Up	1.09	8.56e-08	9.31e-07	0	0	0	0	0	OtherIntergenic	NA
chr2	109333501	109338500	5kb_534	M_F_467	5000	54.85	27.26	Up	1.01	1.11e-08	1.29e-07	0	0	0	0	0	OtherIntergenic	NA
chr3	98752501	98758000	5kb_597	M_F_468	5500	63.53	23.67	Up	1.42	2.5e-12	1.6e-10	0	0	0	0	0	OtherIntergenic	NA
chr4	71302501	71307500	5kb_647	M_F_469	5000	63.05	30.33	Up	1.06	3.38e-05	0.000340828	0	0	0	0	0	Genedesert	NA
chr4	122635501	122643000	5kb_671	M_F_470	7500	118.83	44.24	Up	1.43	4.42e-08	4.88e-07	Mfsd2a	NM_029662	-	122624097	122638430	Promoter1k	-820.5
chr5	32182001	32187000	5kb_696	M_F_471	5000	68.34	27.74	Up	1.3	4.82e-10	6.94e-09	Bre	NM_144541	+	32000422	32387111	Genebody	184078
chr5	44715501	44720500	5kb_702	M_F_472	5000	61.36	28.94	Up	1.08	1.78e-09	2.31e-08	0	0	0	0	0	OtherIntergenic	NA
chr5	101273001	101278000	5kb_719	M_F_473	5000	58.7	27.52	Up	1.09	1.57e-08	1.8e-07	Agpat9	NM_172715	+	101275247	101328120	Promoter1k	253.5
chr6	15568501	15576000	5kb_763	M_F_474	7500	88.05	37.59	Up	1.23	6.5e-12	2.3e-10	0	0	0	0	0	OtherIntergenic	NA
chr6	26434501	26439500	5kb_765	M_F_475	5000	57.58	21.81	Up	1.4	2.95e-12	1.63e-10	0	0	0	0	0	Genedesert	NA
chr6	37773501	37779000	5kb_771	M_F_476	5500	64.41	13.68	Up	2.24	9.98e-13	1.6e-10	0	0	0	0	0	OtherIntergenic	NA
chr6	93277001	93282500	5kb_801	M_F_477	5500	69.45	31.66	Up	1.13	5.81e-09	7.02e-08	0	0	0	0	0	OtherIntergenic	NA
chr6	115360501	115366000	5kb_812	M_F_478	5500	61.8	20.99	Up	1.56	4.58e-11	9.12e-10	Pparg	NM_001127330	+	115311238	115440418	Genebody	52012.5
chr7	14797501	14804500	5kb_822	M_F_479	7000	82.69	34.26	Up	1.27	1.97e-09	2.54e-08	0	0	0	0	0	OtherIntergenic	NA
chr7	26641501	26646500	5kb_830	M_F_480	5000	56.61	27.09	Up	1.06	1.17e-09	1.57e-08	0	0	0	0	0	OtherIntergenic	NA
chr7	27010001	27016500	5kb_833	M_F_481	6500	72.78	12.96	Up	2.49	1.02e-12	1.6e-10	0	0	0	0	0	OtherIntergenic	NA
chr7	27165001	27172500	5kb_834	M_F_482	7500	79.34	37.48	Up	1.08	1.87e-10	2.95e-09	Nlrp9c	NM_001042612	-	27149905	27179261	Genebody	10510.5
chr7	103603001	103608500	5kb_856	M_F_483	5500	72.61	33.55	Up	1.11	1.77e-09	2.29e-08	Odz4	NM_011858	+	103359146	104057063	Genebody	246604
chr8	91811501	91818500	5kb_933	M_F_484	7000	76.2	31.29	Up	1.28	2.37e-10	3.65e-09	0	0	0	0	0	Genedesert	NA
chr9	23145501	23151000	5kb_962	M_F_485	5500	58.27	27.22	Up	1.1	1.91e-06	1.99e-05	Bmper	NM_028472	+	23027519	23289645	Genebody	120732
chr1	50739001	50749000	10kb_15	M_F_486	10000	107.09	36.41	Up	1.56	6.16e-12	6.54e-10	0	0	0	0	0	Genedesert	NA
chr1	145380001	145393000	10kb_80	M_F_487	13000	144.02	71.34	Up	1.01	1.62e-11	7.08e-10	0	0	0	0	0	Genedesert	NA
chr1	162298001	162312000	10kb_89	M_F_488	14000	156.08	64.97	Up	1.26	1.71e-11	7.15e-10	Rabgap1l	NM_013862	-	162186704	162723068	Genebody	418068
chr1	164906001	164918000	10kb_92	M_F_489	12000	112.33	20.03	Up	2.49	9.21e-12	6.54e-10	Fmo3	NM_008030	-	164883930	164914621	Promoter3k	2620.5
chr10	30005001	30015000	10kb_131	M_F_490	10000	112.48	38.59	Up	1.54	8.02e-10	8.92e-09	0	0	0	0	0	OtherIntergenic	NA
chr10	33501001	33513000	10kb_134	M_F_491	12000	123.82	31.4	Up	1.98	3.92e-12	6.54e-10	0	0	0	0	0	OtherIntergenic	NA
chr10	51953001	51964000	10kb_151	M_F_492	11000	110.25	33.01	Up	1.74	5.3e-12	6.54e-10	Dcbld1	NM_025705	+	51953424	52041182	Genebody	5076.5
chr10	100663001	100676000	10kb_184	M_F_493	13000	126.08	62.33	Up	1.02	1.51e-11	6.87e-10	0	0	0	0	0	Genedesert	NA
chr10	105255001	105268000	10kb_185	M_F_494	13000	123.78	48.71	Up	1.35	1.47e-11	6.85e-10	BC067068	NM_207522	-	105200241	105278435	Genebody	16934.5
chr10	106608001	106625000	10kb_186	M_F_495	17000	183.82	70.61	Up	1.38	8.2e-10	9.1e-09	0	0	0	0	0	OtherIntergenic	NA
chr10	123652001	123667000	10kb_192	M_F_496	15000	153.14	56.63	Up	1.44	5.9e-11	1.31e-09	0	0	0	0	0	OtherIntergenic	NA
chr11	29657001	29723000	10kb_213	M_F_497	66000	851.11	378.7	Up	1.17	8.81e-09	7.49e-08	Eml6	NM_146016	-	29643050	29926032	Genebody	236032
chr11	108119001	108130000	10kb_355	M_F_498	11000	117.4	56.82	Up	1.05	1.2e-11	6.57e-10	Prkca	NM_011101	-	107794700	108205201	Genebody	80700.5
chr12	44993001	45028000	10kb_402	M_F_499	35000	439.03	215.9	Up	1.02	9.25e-11	1.69e-09	0	0	0	0	0	Genedesert	NA
chr12	58023001	58047000	10kb_414	M_F_500	24000	301.24	134.64	Up	1.16	1.13e-10	1.93e-09	Slc25a21	NM_001167976	-	57813620	58261629	Genebody	226628
chr13	46386001	46404000	10kb_492	M_F_501	18000	175.86	66.56	Up	1.4	2.86e-11	9e-10	Gm1574	NM_001005422	+	46369089	46395483	Genebody	25911.5
chr15	44502001	44529000	10kb_639	M_F_502	27000	321.62	90.19	Up	1.83	8.62e-11	1.62e-09	5730410E15Rik	NM_178765	-	44503402	44584003	Genebody	68502.5
chr15	44572001	44601000	10kb_640	M_F_503	29000	370.96	163.36	Up	1.18	2.77e-10	3.69e-09	5730410E15Rik	NM_001032727	-	44503402	44619608	Genebody	33107.5
chr15	60719001	60764000	10kb_648	M_F_504	45000	617.09	202.01	Up	1.61	3.23e-09	2.98e-08	0	0	0	0	0	OtherIntergenic	NA
chr15	67867001	67892000	10kb_654	M_F_505	25000	293.34	144.82	Up	1.02	3.42e-10	4.42e-09	0	0	0	0	0	OtherIntergenic	NA
chr15	72976001	73016000	10kb_655	M_F_506	40000	572.73	259.92	Up	1.14	3.1e-09	2.88e-08	Eif2c2	NM_153178	-	72932054	73015376	Genebody	19375.5
chr16	56826001	56845000	10kb_741	M_F_507	19000	203.3	80.64	Up	1.33	4.86e-11	1.16e-09	Tmem45a	NM_019631	-	56805273	56886275	Genebody	50774.5
chr16	56847001	56861000	10kb_742	M_F_508	14000	148.87	63.31	Up	1.23	2.76e-11	8.92e-10	Tmem45a	NM_019631	-	56805273	56886275	Genebody	32274.5
chr16	76176001	76189000	10kb_748	M_F_509	13000	147.11	57.58	Up	1.35	1.54e-10	2.39e-09	0	0	0	0	0	OtherIntergenic	NA
chr18	10438001	10455000	10kb_837	M_F_510	17000	155.44	62.48	Up	1.31	2.32e-11	8.33e-10	Greb1l	NM_001083628	+	10325176	10562938	Genebody	121324
chr18	11992001	12010000	10kb_838	M_F_511	18000	200.26	88.74	Up	1.17	2.55e-09	2.42e-08	Cables1	NM_001146287	+	11997782	12104135	Genebody	3218.5
chr19	27727001	27737000	10kb_919	M_F_512	10000	107	52.44	Up	1.03	1.3e-11	6.64e-10	0	0	0	0	0	OtherIntergenic	NA
chr19	32390001	32409000	10kb_927	M_F_513	19000	216.09	90.67	Up	1.25	8.5e-10	9.39e-09	Sgms1	NM_001168525	-	32197217	32423805	Genebody	24304.5
chr2	7169001	7179000	10kb_991	M_F_514	10000	110.86	48.24	Up	1.2	6.66e-09	5.79e-08	Cugbp2	NM_001110232	-	6460743	7317626	Genebody	143626
chr2	60410001	60427000	10kb_1030	M_F_515	17000	166.59	69.15	Up	1.27	4.69e-11	1.14e-09	0	0	0	0	0	OtherIntergenic	NA
chr3	57098001	57113000	10kb_1172	M_F_516	15000	168.27	71.19	Up	1.24	1.17e-09	1.24e-08	Tm4sf1	NM_008536	-	57090985	57105840	Promoter1k	339.5
chr3	98675001	98707000	10kb_1196	M_F_517	32000	555.95	206.58	Up	1.43	9.5e-11	1.73e-09	Hao2	NM_019545	-	98678441	98697152	Genebody	6151.5
chr3	98709001	98751000	10kb_1197	M_F_518	42000	539.18	167.68	Up	1.69	5.12e-10	6.15e-09	0	0	0	0	0	OtherIntergenic	NA
chr3	98765001	98805000	10kb_1198	M_F_519	40000	480.47	191.56	Up	1.33	5.16e-10	6.2e-09	0	0	0	0	0	OtherIntergenic	NA
chr3	98846001	98860000	10kb_1199	M_F_520	14000	147.96	61.59	Up	1.26	2.63e-11	8.84e-10	0	0	0	0	0	OtherIntergenic	NA
chr3	142357001	142374000	10kb_1237	M_F_521	17000	177.23	53.48	Up	1.73	2.16e-11	8.03e-10	Ccbl2	NM_173763	+	142364043	142407873	Promoter3k	1457.5
chr4	22126001	22181000	10kb_1252	M_F_522	55000	667.77	316.81	Up	1.08	1.56e-10	2.41e-09	0	0	0	0	0	OtherIntergenic	NA
chr4	22849001	22888000	10kb_1255	M_F_523	39000	460.04	184.31	Up	1.32	1.02e-10	1.82e-09	0	0	0	0	0	Genedesert	NA
chr4	71268001	71278000	10kb_1291	M_F_524	10000	102.67	35.89	Up	1.52	3.36e-12	6.54e-10	0	0	0	0	0	Genedesert	NA
chr5	99664001	99681000	10kb_1452	M_F_525	17000	169.29	70.17	Up	1.27	4.14e-11	1.08e-09	Rasgef1b	NM_145839	-	99646438	99681945	Genebody	9444.5
chr5	122384001	122515000	10kb_1502	M_F_526	131000	1916.82	892.97	Up	1.1	1.44e-09	1.48e-08	Cux2	NM_007804	-	122310224	122497833	Genebody	48332.5
chr5	124203001	124217000	10kb_1504	M_F_527	14000	143.31	65.06	Up	1.14	1.07e-11	6.54e-10	Kntc1	NM_001042421	+	124199734	124271601	Genebody	10266.5
chr5	124234001	124246000	10kb_1505	M_F_528	12000	119.51	57.09	Up	1.07	6.25e-10	7.25e-09	Kntc1	NM_001042421	+	124199734	124271601	Genebody	40266.5
chr6	12950001	12963000	10kb_1547	M_F_529	13000	132.31	53.08	Up	1.32	1.43e-09	1.46e-08	0	0	0	0	0	OtherIntergenic	NA
chr6	37560001	37595000	10kb_1565	M_F_530	35000	412.96	157.57	Up	1.39	1.09e-09	1.17e-08	0	0	0	0	0	OtherIntergenic	NA
chr6	51577001	51595000	10kb_1583	M_F_531	18000	210.93	100.78	Up	1.07	5.46e-08	4.34e-07	0	0	0	0	0	OtherIntergenic	NA
chr6	84721001	84732000	10kb_1609	M_F_532	11000	118.46	58.65	Up	1.01	1.31e-10	2.12e-09	Exoc6b	NM_177077	-	84568480	85019506	Genebody	293006
chr6	115402001	115412000	10kb_1646	M_F_533	10000	107.99	34.52	Up	1.65	4.96e-12	6.54e-10	Pparg	NM_011146	+	115372083	115440418	Genebody	34917.5
chr6	115426001	115437000	10kb_1647	M_F_534	11000	119.94	41.52	Up	1.53	9.02e-12	6.54e-10	Pparg	NM_011146	+	115372083	115440418	Genebody	59417.5
chr7	26686001	26703000	10kb_1681	M_F_535	17000	201.6	53.99	Up	1.9	5.18e-11	1.21e-09	Cyp2b10	NM_009999	+	26682682	26711642	Genebody	11818.5
chr7	26885001	26900000	10kb_1682	M_F_536	15000	160.07	18.4	Up	3.12	6.33e-11	1.35e-09	0	0	0	0	0	OtherIntergenic	NA
chr7	27177001	27188000	10kb_1683	M_F_537	11000	114.26	47.36	Up	1.27	6.92e-12	6.54e-10	0	0	0	0	0	OtherIntergenic	NA
chr7	27213001	27231000	10kb_1684	M_F_538	18000	191.48	88.25	Up	1.12	7.17e-11	1.45e-09	Nlrp4a	NM_172896	+	27220131	27260476	Promoter3k	1869.5
chr7	99944001	99955000	10kb_1735	M_F_539	11000	115.82	54.67	Up	1.08	3.98e-09	3.58e-08	Rab30	NM_029494	+	99890223	99985626	Genebody	59277.5
chr7	119816001	119834000	10kb_1751	M_F_540	18000	221.18	105.22	Up	1.07	7.16e-08	5.63e-07	Tead1	NM_001166584	+	119822833	120050316	Promoter3k	2167.5
chr8	11127001	11157000	10kb_1806	M_F_541	30000	394	178.99	Up	1.14	2.2e-10	3.1e-09	0	0	0	0	0	OtherIntergenic	NA
chr8	49626001	49646000	10kb_1833	M_F_542	20000	212.48	79.55	Up	1.42	1.14e-10	1.94e-09	Odz3	NM_001145937	-	49311018	49760043	Genebody	124042
chr8	91657001	91671000	10kb_1858	M_F_543	14000	147.19	69.89	Up	1.07	3.96e-09	3.57e-08	0	0	0	0	0	Genedesert	NA
chr8	91681001	91709000	10kb_1859	M_F_544	28000	299.64	144.99	Up	1.05	1.26e-10	2.07e-09	0	0	0	0	0	Genedesert	NA
chr8	91712001	91751000	10kb_1860	M_F_545	39000	453.96	175.57	Up	1.37	3.86e-10	4.88e-09	0	0	0	0	0	Genedesert	NA
chr8	91759001	91805000	10kb_1861	M_F_546	46000	499.37	216.05	Up	1.21	9.75e-10	1.06e-08	0	0	0	0	0	Genedesert	NA
chr8	91825001	91840000	10kb_1862	M_F_547	15000	153.09	56.56	Up	1.44	2.53e-10	3.43e-09	0	0	0	0	0	Genedesert	NA
chr8	91846001	92102000	10kb_1863	M_F_548	256000	3795.15	1673.06	Up	1.18	4.76e-09	4.24e-08	0	0	0	0	0	Genedesert	NA
chr8	123006001	123016000	10kb_1884	M_F_549	10000	41.27	103.87	Down	-1.33	2.09e-09	2.03e-08	Gse1	NM_198671	+	123012765	123105280	Promoter3k	-1764.5
chr9	23095001	23143000	10kb_1910	M_F_550	48000	634.73	279.1	Up	1.19	1.86e-10	2.74e-09	Bmper	NM_028472	+	23027519	23289645	Genebody	91481.5
chr9	88211001	88262000	10kb_1979	M_F_551	51000	774.37	217.11	Up	1.83	1.22e-09	1.28e-08	Nt5e	NM_011851	+	88222446	88266926	Genebody	14054.5

## Sheet: S6B_MDKO H3K27me3 
S6B Table - Differential H3K27me3 sites in autosomes identified by diffReps comparing E1/E2-KO males to male controls. See Table S6A for details. Liver expressed genes (FPKM >1) are highlighted in green. Columns T-W show information for liver expressed genes including FPKM values in control males and females and response in the DKO Males and DKO Females compared to their sex matched controls.																			Liver expressed genes
Chrom	Start	End	ID	ID	Length	DKOM avg	Male avg	Event	log2FC	pval	padj	Gene Name	Transcript	Strand	TSS	TES	Feature	D2TSS	FPKM M	FPKM F	Response in DKOM	Response in DKOF
chr1	87934001	87952000	10Kb_82	MDKO_M_132	18000	171.24	56.88	Up	1.59	1.75e-11	1.6e-09	2810459M11Rik	NM_001144993	+	87942437	87952029	Promoter1k	563.5	21.6947	16.5054	_	Down
chr1	136124001	136136000	10Kb_130	MDKO_M_133	12000	140.09	43.51	Up	1.69	4.68e-11	1.6e-09	Adora1	NM_001008533	-	136095798	136132003	Promoter3k	2002.5	5.70101	3.89328	Up	Up
chr1	58253801	58256600	2Kb_86	MDKO_M_134	2800	28.91	11.12	Up	1.38	1.56e-07	2.47e-06	Aox3	NM_023617	+	58169979	58257295	Genebody	85221.5	243.876	78.3049	Down	_
chr1	173123301	173124300	1kb_441	MDKO_M_148	1000	19.95	9.32	Up	1.1	2.91e-05	0.000371757	Pcp4l1	NM_025557	-	173103394	173126398	Promoter3k	2597.5	3.80268	8.00632	_	Up
chr10	82797301	82798300	1kb_727	MDKO_M_284	1000	20.27	8.99	Up	1.17	5.21e-05	0.00061371	Slc41a2	NM_177388	-	82693883	82800561	Promoter3k	2760.5	4.18916	1.36054	_	_
chr11	12363001	12368000	5Kb_471	MDKO_M_390	5000	50.53	22.49	Up	1.17	9.22e-08	1.23e-06	Cobl	NM_172496	-	12136678	12364962	Promoter1k	-538.5	3.7572	2.6513	Up	Up
chr11	101233201	101234200	1kb_1356	MDKO_M_393	1000	12.26	1.66	Up	2.88	1.74e-09	6.56e-08	G6pc	NM_008061	+	101229043	101239216	Genebody	4657.5	203.534	100.356	_	Up
chr11	61184001	61196000	10Kb_406	MDKO_M_414	12000	119.23	48.06	Up	1.31	7.2e-09	8e-08	Slc47a1	NM_026183	-	61156901	61191576	Promoter3k	1575.5	35.6005	49.7542	_	Down
chr12	8776001	8784000	5Kb_798	MDKO_M_493	8000	92.05	31.03	Up	1.57	8.31e-12	1.15e-09	Sdc1	NM_011519	+	8778201	8800492	Promoter3k	1799.5	56.24	77.9452	_	_
chr13	24368001	24373500	5Kb_970	MDKO_M_589	5500	61.24	28.54	Up	1.1	6.56e-09	1.09e-07	Lrrc16a	NM_026825	-	24104352	24372658	Promoter3k	1907.5	5.50949	2.51494	_	Down
chr13	36805001	36836000	10Kb_742	MDKO_M_591	31000	454.91	171.67	Up	1.41	3.22e-09	3.8e-08	Nrn1	NM_153529	-	36817494	36826322	Genebody	5821.5	134.335	187.875	_	Down
chr15	10107001	10109000	2Kb_2047	MDKO_M_765	2000	22.78	10.53	Up	1.11	5.09e-05	0.000459734	Prlr	NM_011169	+	10106992	10266774	Promoter3k	1008.5	5.85589	25.5983	Up	_
chr15	59144501	59150000	5Kb_1311	MDKO_M_768	5500	56.81	28.32	Up	1	1.14e-08	1.79e-07	Sqle	NM_009270	+	59146646	59162747	Promoter1k	604.5	11.9955	20.4749	Up	Down
chr17	57361501	57366500	5Kb_1671	MDKO_M_922	5000	50.22	11.68	Up	2.1	6.95e-13	1.15e-09	C3	NM_009778	-	57343395	57367558	Genebody	3557.5	1018.23	1556.2	Up	Up
chr17	33045001	33058000	10Kb_1184	MDKO_M_925	13000	120.09	38.14	Up	1.65	1.15e-11	1.6e-09	Cyp4f14	NM_022434	-	33042014	33054022	Promoter3k	2521.5	90.4143	120.002	Up	_
chr17	48053001	48068000	10Kb_1211	MDKO_M_927	15000	144.78	69.95	Up	1.05	9.89e-09	1.07e-07	Foxp4	NM_028767	-	48004081	48061580	Promoter3k	1079.5	6.2022	4.60358	_	_
chr17	56259201	56261400	2Kb_2651	MDKO_M_928	2200	34.98	8.83	Up	1.99	4.99e-13	5e-10	Lrg1	NM_029796	-	56259100	56261368	Promoter3k	1067.5	201.907	104.804	_	_
chr18	12803401	12804400	1kb_3190	MDKO_M_1014	1000	12.52	2.14	Up	2.55	2.05e-08	5.79e-07	Ttc39c	NM_028341	+	12802041	12895559	Promoter3k	1859.5	176.957	54.9126	Down	Down
chr19	46199001	46221000	10Kb_1427	MDKO_M_1084	22000	294.48	143.44	Up	1.04	2.78e-08	2.82e-07	Elovl3	NM_007703	+	46206388	46210183	Genebody	3612.5	69.1299	0.793639	Down	Up
chr19	12790301	12791300	1kb_3479	MDKO_M_1089	1000	12.73	2.46	Up	2.37	7.44e-08	1.86e-06	Keg1	NM_029550	+	12770279	12794383	Genebody	20521.5	147.229	60.6314	Down	Down
chr2	34861001	34874000	10Kb_1519	MDKO_M_1230	13000	120.17	40.06	Up	1.58	5e-11	1.62e-09	Hc	NM_010406	-	34838850	34916915	Genebody	49414.5	172.845	120.602	Down	_
chr2	60220201	60223000	2Kb_3340	MDKO_M_1234	2800	32.3	14.74	Up	1.13	2.88e-07	4.32e-06	Ly75	NM_013825	-	60131816	60221287	Promoter1k	-313.5	0.398397	0.708597	Up	_
chr4	122627401	122629600	2Kb_4341	MDKO_M_1484	2200	9.16	30.18	Down	-1.72	3.77e-11	1.73e-09	Mfsd2a	NM_029662	-	122624097	122638430	Genebody	9929.5	22.7214	54.4109	Up	_
chr3	95700001	95717000	10Kb_1805	MDKO_M_1381	17000	178.68	78.25	Up	1.19	8.52e-11	1.9e-09	Car14	NM_011797	-	95701722	95708561	ProximalPromoter	60.5	17.9748	11.7807	_	Up
chr3	54559801	54561800	2Kb_3793	MDKO_M_1396	2000	21	8.88	Up	1.24	1.43e-05	0.000150203	Smad9	NM_019483	+	54559503	54605178	Promoter3k	1297.5	2.90384	1.16634	_	Up
chr4	128910001	128933000	10Kb_2007	MDKO_M_1504	23000	247.7	82.83	Up	1.58	4.02e-11	1.6e-09	C77080	NM_001033189	-	128896821	128925686	Genebody	4185.5	21.5732	15.6967	Down	_
chr4	8615001	8616000	1kb_4662	MDKO_M_1506	1000	15.71	3.76	Up	2.06	1.54e-08	4.48e-07	Chd7	NM_001081417	+	8618067	8793955	Promoter3k	-2566.5	2.43354	1.82862	Down	_
chr4	106226001	106238000	10Kb_1967	MDKO_M_1508	12000	127.16	44.2	Up	1.52	1.16e-11	1.6e-09	Dhcr24	NM_053272	+	106233642	106261717	Promoter3k	-1641.5	169.31	242.259	_	Down
chr4	107834001	107845000	10Kb_1968	MDKO_M_1509	11000	99.17	31.48	Up	1.66	7.01e-12	1.6e-09	Echdc2	NM_026728	+	107838070	107851911	Promoter3k	1430.5	115.749	92.9173	_	_
chr4	57148001	57164000	10Kb_1933	MDKO_M_1510	16000	156.5	76.8	Up	1.03	3.37e-11	1.6e-09	Epb4.1l4b	NM_019427	-	57074597	57156027	ProximalPromoter	26.5	41.3892	32.7319	Down	Down
chr4	15071501	15077000	5Kb_2540	MDKO_M_1516	5500	57.46	23.5	Up	1.29	2.61e-12	1.15e-09	Necab1	NM_178617	-	14879393	15076277	Promoter3k	2026.5	7.50999	5.40567	Up	Up
chr4	57312001	57317000	5Kb_2607	MDKO_M_1522	5000	59.46	23.64	Up	1.33	4.84e-12	1.15e-09	Ptpn3	NM_011207	-	57203712	57314708	ProximalPromoter	207.5	8.25729	6.22337	Down	Down
chr4	107887001	107895000	5Kb_2665	MDKO_M_1530	8000	90.13	29.29	Up	1.62	8.78e-11	2.57e-09	Zyg11a	NM_001167936	-	107854539	107890526	Promoter1k	-474.5	4.52921	2.40401	_	_
chr5	90888801	90891200	2Kb_4651	MDKO_M_1638	2400	24.01	3.26	Up	2.88	2.1e-10	6.76e-09	Alb	NM_009654	+	90889914	90905628	ProximalPromoter	86.5	32855.3	48059.4	Down	Down
chr5	128109501	128114500	5Kb_2989	MDKO_M_1646	5000	66.78	21.89	Up	1.61	6.19e-11	2.05e-09	Glt1d1	NM_177005	+	128112631	128187889	Promoter1k	-630.5	14.4337	21.0722	_	Down
chr5	45881801	45883800	2Kb_4579	MDKO_M_1651	2000	23.01	10.83	Up	1.09	1.92e-05	0.000195143	Lap3	NM_024434	+	45884612	45903929	Promoter3k	-1811.5	129.767	101.759	Down	Down
chr5	111843501	111851500	5Kb_2946	MDKO_M_1654	8000	92.29	33.11	Up	1.48	9.82e-10	1.94e-08	Mn1	NM_001081235	+	111847185	111886044	Promoter1k	315.5	2.77556	1.9488	_	_
chr5	73729201	73731200	2Kb_4626	MDKO_M_1655	2000	28.87	7.45	Up	1.95	5.52e-13	5e-10	Ociad2	NM_026950	-	73713437	73729877	Promoter1k	-323.5	15.5031	9.16689	Down	Down
chr5	53595001	53613000	10Kb_2127	MDKO_M_1659	18000	180.31	86.91	Up	1.05	5.75e-11	1.65e-09	Sel1l3	NM_172710	-	53498321	53604690	Promoter1k	689.5	5.55175	3.71102	_	_
chr5	89575901	89576900	1kb_5339	MDKO_M_1663	1000	12.07	3.92	Up	1.62	7.27e-05	0.000807874	Slc4a4	NM_001136260	+	89316284	89668679	Genebody	260116	8.69918	12.5186	Up	Up
chr5	93030201	93031500	1kb_5348	MDKO_M_1664	1300	18.3	8.19	Up	1.16	4.93e-05	0.000584646	Stbd1	NM_175096	+	93032076	93035604	Promoter3k	-1225.5	67.3051	45.4296	Down	_
chr6	128530401	128532400	2Kb_5224	MDKO_M_1770	2000	21.62	9.7	Up	1.16	4.61e-05	0.000421346	BC048546	NM_001001179	-	128489839	128531623	ProximalPromoter	222.5	4.33162	2.92121	Down	Down
chr6	94644001	94662000	10Kb_2376	MDKO_M_1774	18000	176.41	83.36	Up	1.08	2.79e-11	1.6e-09	Lrig1	NM_008377	-	94554522	94650138	Promoter3k	-2862.5	7.2465	5.10412	_	_
chr6	94598001	94615000	10Kb_2375	MDKO_M_1775	17000	159.06	60.68	Up	1.39	5.29e-11	1.63e-09	Lrig1	NM_008377	-	94554522	94650138	Genebody	43637.5	7.2465	5.10412	_	_
chr7	19603501	19611000	5Kb_3284	MDKO_M_1908	7500	91.5	22.91	Up	2	2.3e-09	4.19e-08	Foxa3	NM_008260	-	19598631	19608887	Promoter3k	1636.5	30.9179	21.5383	Down	_
chr7	20374101	20375200	1kb_6090	MDKO_M_1909	1100	12.28	3.63	Up	1.76	2.12e-05	0.000283295	Cblc	NM_001161844	-	20365068	20382157	Genebody	7506.5	10.6406	7.13137	_	_
chr7	20381001	20383200	1kb_6091	MDKO_M_1910	2200	35.95	7.66	Up	2.23	4.64e-11	3.08e-09	Cblc	NM_001161844	-	20365068	20382157	ProximalPromoter	56.5	10.6406	7.13137	_	_
chr7	79450801	79452100	1kb_6275	MDKO_M_1941	1300	15.17	4.4	Up	1.78	5.36e-07	1.11e-05	Mctp2	NM_001024703	-	79222715	79451480	ProximalPromoter	29.5	3.04437	2.19713	_	_
chr7	88786101	88787100	1kb_6302	MDKO_M_1947	1000	14.23	4.51	Up	1.66	9.41e-05	0.000994378	Homer2	NM_001164087	-	88745367	88837850	Genebody	51249.5	4.24829	6.34862	_	Down
chr7	133416501	133417500	1kb_6488	MDKO_M_1969	1000	15.46	4.48	Up	1.79	1.26e-05	0.000179994	Sbk1	NM_145587	+	133416132	133438512	Promoter1k	868.5	6.85959	12.309	_	_
chr7	134264801	134265900	1kb_6490	MDKO_M_1971	1100	15.08	2.33	Up	2.69	1.36e-08	4e-07	Qprt	NM_133686	-	134251283	134265542	ProximalPromoter	191.5	108.238	85.2119	_	_
chr7	148542901	148544300	1kb_6584	MDKO_M_1982	1400	17.68	6.74	Up	1.39	8.62e-06	0.0001292	Eps8l2	NM_133191	+	148524900	148548914	Genebody	18700.5	16.1125	9.21889	_	Up
chr8	97869001	97885000	10Kb_2761	MDKO_M_2078	16000	162.76	62.97	Up	1.37	4.79e-11	1.61e-09	Mmp15	NM_008609	+	97876236	97898192	Promoter1k	764.5	12.2521	8.84883	_	_
chr8	96701801	96705400	2Kb_5989	MDKO_M_2079	3600	49.82	22.71	Up	1.13	9.79e-08	1.6e-06	Mt1	NM_013602	+	96702988	96704224	Promoter1k	612.5	38.9191	195.305	Up	UP
chr8	87227501	87234000	5Kb_3663	MDKO_M_2082	6500	67.7	22.67	Up	1.58	5.59e-10	1.17e-08	Nfix	NM_001081981	-	87231497	87298267	Genebody	67516.5	18.2707	14.9031	_	_
chr8	87306001	87314000	5Kb_3664	MDKO_M_2083	8000	78.18	25.47	Up	1.62	5.87e-12	1.15e-09	Nfix	NM_001081982	-	87231497	87324238	Genebody	14237.5	18.2707	14.9031	_	_
chr8	91555001	91578000	10Kb_2729	MDKO_M_2088	23000	317.02	153.88	Up	1.04	8.31e-10	1.12e-08	Sall1	NM_021390	-	91551142	91568060	Promoter3k	1559.5	5.10602	11.2528	_	_
chr9	46035501	46042500	5Kb_3864	MDKO_M_2208	7000	73.19	22.76	Up	1.68	6.76e-10	1.39e-08	Apoa1	NM_009692	+	46036712	46038548	Promoter3k	2288.5	7193.72	4577.24	Down	_
chr10	36952001	37066000	10Kb_240	MDKO_M_169	114000	493.22	1566.49	Down	-1.67	4.66e-08	4.61e-07	0	0	0	0	0	Genedesert	NA	NA	NA	NA	NA
chr5	132731001	133034000	10Kb_2239	MDKO_M_1575	303000	2039.78	4177.56	Down	-1.03	3.46e-09	4.06e-08	Auts2	NM_177047	-	131913551	133018212	Genebody	135712	NA	NA	NA	NA
chr7	26875201	26877600	2Kb_5311	MDKO_M_1803	2400	2.72	25.09	Down	-3.21	9.34e-14	5e-10	Cyp2b13	NM_007813	+	26846513	26881214	Genebody	29887.5	NA	NA	NA	NA
chr3	98649001	98707000	10Kb_1812	MDKO_M_1358	58000	182.93	854.03	Down	-2.22	1.66e-10	2.92e-09	Hao2	NM_019545	-	98678441	98697152	Genebody	19151.5	NA	NA	NA	NA
chr1	81572801	81575400	2Kb_169	MDKO_M_1	2600	7.29	35.16	Down	-2.27	4.85e-10	1.38e-08	0	0	0	0	0	OtherIntergenic	NA	NA	NA	NA	NA
chr11	105223001	105228000	5Kb_730	MDKO_M_294	5000	38.88	79.11	Down	-1.02	8.55e-06	8.45e-05	42804	NM_172568	-	105222112	105318048	Genebody	92547.5	NA	NA	NA	NA
chr1	170418001	170423000	5Kb_231	MDKO_M_3	5000	16.6	64.95	Down	-1.97	7.97e-10	1.6e-08	0	0	0	0	0	Genedesert	NA	NA	NA	NA	NA
chr12	56441001	56471000	10Kb_621	MDKO_M_425	30000	158.91	368.4	Down	-1.21	7.63e-11	1.81e-09	1110008L16Rik	NM_025373	+	56403623	56483477	Genebody	52377.5	NA	NA	NA	NA
chr2	30651201	30653200	2Kb_3258	MDKO_M_1096	2000	17.79	36.31	Down	-1.03	7.42e-05	0.000632888	1700001O22Rik	NM_198000	-	30651090	30657226	Genebody	5025.5	NA	NA	NA	NA
chr1	145394001	145422000	10Kb_146	MDKO_M_6	28000	98.22	350.02	Down	-1.83	3.16e-10	4.82e-09	0	0	0	0	0	Genedesert	NA	NA	NA	NA	NA
chr1	138476901	138478000	1kb_336	MDKO_M_7	1100	4.27	14.44	Down	-1.76	1.02e-06	1.95e-05	0	0	0	0	0	OtherIntergenic	NA	NA	NA	NA	NA
chr1	170527601	170529800	2Kb_381	MDKO_M_8	2200	9.12	28.99	Down	-1.67	1.98e-06	2.54e-05	0	0	0	0	0	Genedesert	NA	NA	NA	NA	NA
chr1	196148201	196149300	1kb_539	MDKO_M_9	1100	4.39	13.95	Down	-1.67	5.73e-06	9.04e-05	0	0	0	0	0	Genedesert	NA	NA	NA	NA	NA
chr1	145334201	145336200	2Kb_306	MDKO_M_10	2000	7.28	22.73	Down	-1.64	1.35e-09	3.39e-08	0	0	0	0	0	Genedesert	NA	NA	NA	NA	NA
chr1	59964101	59965100	1kb_80	MDKO_M_11	1000	4.35	13.37	Down	-1.62	1.45e-05	0.000203597	0	0	0	0	0	OtherIntergenic	NA	NA	NA	NA	NA
chr1	170391501	170392500	1kb_433	MDKO_M_12	1000	5.42	16.51	Down	-1.61	1.83e-05	0.00024926	0	0	0	0	0	Genedesert	NA	NA	NA	NA	NA
chr1	50739501	50748500	5Kb_43	MDKO_M_13	9000	33.25	100.65	Down	-1.6	4.75e-12	1.15e-09	0	0	0	0	0	Genedesert	NA	NA	NA	NA	NA
chr1	170424401	170427000	2Kb_379	MDKO_M_14	2600	10.49	31.54	Down	-1.59	7.44e-11	2.86e-09	0	0	0	0	0	Genedesert	NA	NA	NA	NA	NA
chr1	91796201	91798200	2Kb_199	MDKO_M_15	2000	8	23.5	Down	-1.55	4.15e-09	9.12e-08	0	0	0	0	0	OtherIntergenic	NA	NA	NA	NA	NA
chr11	29471001	29476000	5Kb_479	MDKO_M_295	5000	20.87	52.44	Down	-1.33	5.58e-10	1.17e-08	1700034F02Rik	NM_001163521	+	29447949	29478351	Genebody	25551.5	NA	NA	NA	NA
chr1	132196201	132197500	1kb_300	MDKO_M_17	1300	6.86	19.94	Down	-1.54	1.76e-07	4.03e-06	0	0	0	0	0	OtherIntergenic	NA	NA	NA	NA	NA
chr1	18967201	18968200	1kb_16	MDKO_M_18	1000	4.92	14.3	Down	-1.54	3.81e-05	0.00046928	0	0	0	0	0	OtherIntergenic	NA	NA	NA	NA	NA
chr1	173976601	173977600	1kb_444	MDKO_M_19	1000	6.38	17.93	Down	-1.49	6.22e-06	9.71e-05	0	0	0	0	0	OtherIntergenic	NA	NA	NA	NA	NA
chr1	36187801	36188800	1kb_25	MDKO_M_20	1000	4.61	12.88	Down	-1.48	5.65e-05	0.00065499	0	0	0	0	0	OtherIntergenic	NA	NA	NA	NA	NA
chr1	81577201	81578300	1kb_177	MDKO_M_21	1100	5.84	16.05	Down	-1.46	3.06e-06	5.19e-05	0	0	0	0	0	OtherIntergenic	NA	NA	NA	NA	NA
chr1	10299601	10300600	1kb_9	MDKO_M_22	1000	5.4	14.7	Down	-1.44	4.8e-05	0.000570419	0	0	0	0	0	OtherIntergenic	NA	NA	NA	NA	NA
chr6	112158401	112160600	2Kb_5166	MDKO_M_1679	2200	11.13	26.69	Down	-1.26	1.45e-07	2.3e-06	1700054K19Rik	NR_027865	+	112160701	112162506	Promoter3k	-1200.5	NA	NA	NA	NA
chr1	189309001	189314500	5Kb_265	MDKO_M_24	5500	21.83	58.89	Down	-1.43	1.75e-12	1.15e-09	0	0	0	0	0	OtherIntergenic	NA	NA	NA	NA	NA
chr1	187368701	187369900	1kb_479	MDKO_M_25	1200	6.04	16.18	Down	-1.42	1.4e-05	0.000197859	0	0	0	0	0	OtherIntergenic	NA	NA	NA	NA	NA
chr1	76702501	76703500	1kb_147	MDKO_M_26	1000	5.17	13.52	Down	-1.39	5.5e-05	0.00064034	0	0	0	0	0	Genedesert	NA	NA	NA	NA	NA
chr1	167648001	167649000	1kb_426	MDKO_M_27	1000	6.57	17.08	Down	-1.38	1.66e-06	3.02e-05	0	0	0	0	0	OtherIntergenic	NA	NA	NA	NA	NA
chr1	76721001	76737000	10Kb_71	MDKO_M_28	16000	65.44	167.67	Down	-1.36	1.75e-10	3.04e-09	0	0	0	0	0	Genedesert	NA	NA	NA	NA	NA
chr1	64065401	64066400	1kb_97	MDKO_M_29	1000	5.33	13.65	Down	-1.36	9.79e-05	0.00102569	0	0	0	0	0	OtherIntergenic	NA	NA	NA	NA	NA
chr1	121021001	121189000	10Kb_109	MDKO_M_30	168000	934.53	2377.1	Down	-1.35	2.03e-09	2.49e-08	0	0	0	0	0	OtherIntergenic	NA	NA	NA	NA	NA
chr1	182242001	182245600	2Kb_400	MDKO_M_31	3600	20.07	51.33	Down	-1.35	4.49e-08	7.91e-07	0	0	0	0	0	OtherIntergenic	NA	NA	NA	NA	NA
chr1	145341801	145343800	2Kb_307	MDKO_M_32	2000	10.24	26	Down	-1.34	2.34e-06	2.95e-05	0	0	0	0	0	Genedesert	NA	NA	NA	NA	NA
chr1	186360401	186361400	1kb_472	MDKO_M_33	1000	6.45	16.33	Down	-1.34	2.41e-05	0.000315926	0	0	0	0	0	OtherIntergenic	NA	NA	NA	NA	NA
chr1	39915001	39973000	10Kb_30	MDKO_M_34	58000	332.51	831.57	Down	-1.32	6.66e-10	9.22e-09	0	0	0	0	0	OtherIntergenic	NA	NA	NA	NA	NA
chr1	40115101	40116200	1kb_57	MDKO_M_35	1100	7.02	17.52	Down	-1.32	3.43e-05	0.000428745	0	0	0	0	0	OtherIntergenic	NA	NA	NA	NA	NA
chr1	189381301	189382300	1kb_498	MDKO_M_36	1000	5.5	13.75	Down	-1.32	9.79e-05	0.00102569	0	0	0	0	0	OtherIntergenic	NA	NA	NA	NA	NA
chr1	145758001	145814000	10Kb_148	MDKO_M_37	56000	307.65	764.97	Down	-1.31	1.74e-10	3.04e-09	0	0	0	0	0	OtherIntergenic	NA	NA	NA	NA	NA
chr1	76849201	76851400	2Kb_153	MDKO_M_38	2200	10.24	25.42	Down	-1.31	6.49e-08	1.1e-06	0	0	0	0	0	Genedesert	NA	NA	NA	NA	NA
chr1	76890001	76951000	10Kb_73	MDKO_M_39	61000	284.02	697.35	Down	-1.3	2.6e-10	4.15e-09	0	0	0	0	0	Genedesert	NA	NA	NA	NA	NA
chr1	76739001	76759000	10Kb_72	MDKO_M_40	20000	89.41	220.05	Down	-1.3	2.45e-11	1.6e-09	0	0	0	0	0	Genedesert	NA	NA	NA	NA	NA
chr1	170399001	170401000	2Kb_376	MDKO_M_41	2000	10.06	24.44	Down	-1.28	8.29e-08	1.38e-06	0	0	0	0	0	Genedesert	NA	NA	NA	NA	NA
chr1	145380001	145392000	10Kb_145	MDKO_M_42	12000	56.44	135.75	Down	-1.27	6.58e-12	1.6e-09	0	0	0	0	0	Genedesert	NA	NA	NA	NA	NA
chr1	189324901	189325900	1kb_497	MDKO_M_43	1000	5.69	13.76	Down	-1.27	9.79e-05	0.00102569	0	0	0	0	0	OtherIntergenic	NA	NA	NA	NA	NA
chr1	158349301	158350300	1kb_387	MDKO_M_44	1000	6.84	16.24	Down	-1.25	6.26e-05	0.000714297	0	0	0	0	0	OtherIntergenic	NA	NA	NA	NA	NA
chr1	75673001	75702000	10Kb_69	MDKO_M_45	29000	136.98	322.61	Down	-1.24	7.45e-11	1.8e-09	0	0	0	0	0	Genedesert	NA	NA	NA	NA	NA
chr1	4655001	4661000	5Kb_4	MDKO_M_46	6000	26.34	62.34	Down	-1.24	3.5e-12	1.15e-09	0	0	0	0	0	OtherIntergenic	NA	NA	NA	NA	NA
chr1	39895601	39897600	2Kb_56	MDKO_M_47	2000	10.49	24.79	Down	-1.24	8.68e-07	1.19e-05	0	0	0	0	0	OtherIntergenic	NA	NA	NA	NA	NA
chr1	188732001	188785000	10Kb_198	MDKO_M_48	53000	285.26	664.86	Down	-1.22	3.75e-09	4.36e-08	0	0	0	0	0	OtherIntergenic	NA	NA	NA	NA	NA
chr1	145422601	145425000	2Kb_311	MDKO_M_49	2400	14.08	32.51	Down	-1.21	8.4e-07	1.16e-05	0	0	0	0	0	Genedesert	NA	NA	NA	NA	NA
chr1	186406201	186408200	2Kb_414	MDKO_M_50	2000	10.39	24.1	Down	-1.21	1.84e-06	2.38e-05	0	0	0	0	0	OtherIntergenic	NA	NA	NA	NA	NA
chr1	76021001	76054000	10Kb_70	MDKO_M_51	33000	166.58	376.17	Down	-1.18	6.21e-11	1.68e-09	0	0	0	0	0	Genedesert	NA	NA	NA	NA	NA
chr1	183580101	183581500	1kb_467	MDKO_M_52	1400	8.99	20.37	Down	-1.18	5.86e-05	0.000677286	0	0	0	0	0	OtherIntergenic	NA	NA	NA	NA	NA
chr1	158367001	158452000	10Kb_157	MDKO_M_53	85000	475.17	1055.6	Down	-1.15	1.81e-08	1.89e-07	0	0	0	0	0	OtherIntergenic	NA	NA	NA	NA	NA
chr1	170434001	170436400	2Kb_380	MDKO_M_54	2400	12.59	27.93	Down	-1.15	1e-06	1.37e-05	0	0	0	0	0	Genedesert	NA	NA	NA	NA	NA
chr1	145327601	145329600	2Kb_305	MDKO_M_55	2000	10.42	23.06	Down	-1.15	5.11e-06	5.97e-05	0	0	0	0	0	Genedesert	NA	NA	NA	NA	NA
chr1	69832601	69835400	2Kb_109	MDKO_M_56	2800	14.41	31.64	Down	-1.13	6.36e-07	8.97e-06	0	0	0	0	0	OtherIntergenic	NA	NA	NA	NA	NA
chr1	75922001	75924200	2Kb_141	MDKO_M_57	2200	13.59	29.76	Down	-1.13	4.85e-07	6.98e-06	0	0	0	0	0	Genedesert	NA	NA	NA	NA	NA
chr1	164832001	164834400	2Kb_358	MDKO_M_58	2400	13.38	29.19	Down	-1.13	4.7e-07	6.8e-06	0	0	0	0	0	OtherIntergenic	NA	NA	NA	NA	NA
chr1	158466001	158468600	2Kb_345	MDKO_M_59	2600	15.36	33.32	Down	-1.12	3.42e-08	6.19e-07	0	0	0	0	0	OtherIntergenic	NA	NA	NA	NA	NA
chr1	159030201	159032400	2Kb_346	MDKO_M_2	2200	14.58	29.22	Down	-1	5.27e-06	6.14e-05	1700057K13Rik	NM_028540	-	159029278	159038775	Genebody	7474.5	NA	NA	NA	NA
chr1	76830001	76835500	5Kb_86	MDKO_M_61	5500	26.22	56.19	Down	-1.1	1.03e-08	1.64e-07	0	0	0	0	0	Genedesert	NA	NA	NA	NA	NA
chr1	61459201	61461200	2Kb_91	MDKO_M_62	2000	12.88	27.4	Down	-1.09	4.36e-05	0.000400465	0	0	0	0	0	OtherIntergenic	NA	NA	NA	NA	NA
chr1	186566601	186568600	2Kb_418	MDKO_M_63	2000	12.03	25.69	Down	-1.09	4.63e-06	5.46e-05	0	0	0	0	0	OtherIntergenic	NA	NA	NA	NA	NA
chr1	66940001	66954000	10Kb_51	MDKO_M_64	14000	77.13	162.1	Down	-1.07	6.95e-08	6.71e-07	0	0	0	0	0	OtherIntergenic	NA	NA	NA	NA	NA
chr1	139174001	139185000	10Kb_143	MDKO_M_65	11000	52.96	111.12	Down	-1.07	1.06e-11	1.6e-09	0	0	0	0	0	Genedesert	NA	NA	NA	NA	NA
chr1	145820001	145868000	10Kb_149	MDKO_M_66	48000	298.57	622.17	Down	-1.06	3.24e-09	3.82e-08	0	0	0	0	0	OtherIntergenic	NA	NA	NA	NA	NA
chr1	137685201	137687200	2Kb_293	MDKO_M_67	2000	14.42	30.01	Down	-1.06	2.73e-06	3.39e-05	0	0	0	0	0	OtherIntergenic	NA	NA	NA	NA	NA
chr1	183452001	183453000	1kb_466	MDKO_M_68	1000	8.88	18.48	Down	-1.06	7.28e-05	0.000807874	0	0	0	0	0	OtherIntergenic	NA	NA	NA	NA	NA
chr1	121192001	121233000	10Kb_110	MDKO_M_69	41000	225.93	466.81	Down	-1.05	1.52e-10	2.74e-09	0	0	0	0	0	OtherIntergenic	NA	NA	NA	NA	NA
chr1	91131201	91133200	2Kb_197	MDKO_M_70	2000	14.02	29.03	Down	-1.05	1.59e-05	0.000165533	0	0	0	0	0	OtherIntergenic	NA	NA	NA	NA	NA
chr1	90912001	90914200	2Kb_192	MDKO_M_71	2200	13.73	28.25	Down	-1.04	6.97e-06	7.9e-05	0	0	0	0	0	OtherIntergenic	NA	NA	NA	NA	NA
chr1	74223601	74225600	2Kb_120	MDKO_M_72	2000	12.25	25.16	Down	-1.04	8.15e-05	0.000687433	0	0	0	0	0	OtherIntergenic	NA	NA	NA	NA	NA
chr1	90793001	90809000	10Kb_90	MDKO_M_73	16000	83.41	170.38	Down	-1.03	5.47e-10	7.74e-09	0	0	0	0	0	OtherIntergenic	NA	NA	NA	NA	NA
chr1	6373601	6376200	2Kb_7	MDKO_M_74	2600	19.24	39.36	Down	-1.03	4.22e-07	6.16e-06	0	0	0	0	0	OtherIntergenic	NA	NA	NA	NA	NA
chr1	159371001	159384000	10Kb_158	MDKO_M_75	13000	63.95	129.56	Down	-1.02	3.88e-11	1.6e-09	0	0	0	0	0	OtherIntergenic	NA	NA	NA	NA	NA
chr1	90328201	90331200	2Kb_180	MDKO_M_76	3000	17.74	35.94	Down	-1.02	8.44e-07	1.16e-05	0	0	0	0	0	OtherIntergenic	NA	NA	NA	NA	NA
chr1	170413401	170415400	2Kb_377	MDKO_M_77	2000	11.8	23.89	Down	-1.02	5.71e-05	0.00050781	0	0	0	0	0	Genedesert	NA	NA	NA	NA	NA
chr1	183781601	183784600	2Kb_411	MDKO_M_78	3000	15.91	32.12	Down	-1.01	4.15e-07	6.07e-06	0	0	0	0	0	OtherIntergenic	NA	NA	NA	NA	NA
chr1	43321001	43323600	2Kb_66	MDKO_M_79	2600	14.57	29.37	Down	-1.01	7.67e-06	8.61e-05	0	0	0	0	0	OtherIntergenic	NA	NA	NA	NA	NA
chr1	172061401	172063600	2Kb_384	MDKO_M_80	2200	14.23	28.58	Down	-1.01	6.09e-05	0.000535995	0	0	0	0	0	OtherIntergenic	NA	NA	NA	NA	NA
chr1	87829801	87832400	2Kb_172	MDKO_M_81	2600	17.8	35.59	Down	-1	2.98e-05	0.000287791	0	0	0	0	0	OtherIntergenic	NA	NA	NA	NA	NA
chr1	94595401	94597600	2Kb_207	MDKO_M_82	2200	14.83	29.67	Down	-1	3.72e-05	0.000348996	0	0	0	0	0	OtherIntergenic	NA	NA	NA	NA	NA
chr17	35993001	36012000	10Kb_1193	MDKO_M_856	19000	56.49	218.69	Down	-1.95	4.64e-11	1.6e-09	2310014H01Rik	NM_001146711	+	36002539	36012540	ProximalPromoter	-38.5	NA	NA	NA	NA
chr6	54628801	54630800	2Kb_5066	MDKO_M_1682	2000	13.92	30.58	Down	-1.13	2.41e-05	0.000239638	2410066E13Rik	NM_026629	+	54631765	54650399	Promoter3k	-1964.5	NA	NA	NA	NA
chr11	112911001	112913000	2Kb_1230	MDKO_M_296	2000	11.04	25.97	Down	-1.23	1.7e-06	2.2e-05	2610035D17Rik	NR_015556	-	112905219	113063151	Genebody	151150	NA	NA	NA	NA
chr9	65737601	65740400	2Kb_6357	MDKO_M_2107	2800	12.95	34.09	Down	-1.4	7.91e-07	1.09e-05	2810417H13Rik	NM_026515	+	65738129	65751357	Promoter1k	871.5	NA	NA	NA	NA
chr12	50507501	50508500	1kb_1583	MDKO_M_428	1000	4.86	12.86	Down	-1.4	5.65e-05	0.00065499	3110039M20Rik	NR_026733	+	50490638	50508331	Genebody	17362.5	NA	NA	NA	NA
chr10	59808601	59811600	2Kb_564	MDKO_M_165	3000	16.31	39.9	Down	-1.29	5.53e-09	1.18e-07	4632428N05Rik	NM_001159572	+	59809598	59835431	Promoter1k	502.5	NA	NA	NA	NA
chr1	164984601	164987000	2Kb_361	MDKO_M_4	2400	13.11	31.81	Down	-1.28	9.58e-08	1.57e-06	4921528O07Rik	NM_030071	-	164954432	165015800	Genebody	29999.5	NA	NA	NA	NA
chr1	164990201	164993000	2Kb_362	MDKO_M_5	2800	14.37	33.17	Down	-1.21	3.96e-07	5.82e-06	4921528O07Rik	NM_030071	-	164954432	165015800	Genebody	24199.5	NA	NA	NA	NA
chr2	157063501	157065000	1kb_4171	MDKO_M_1102	1500	6.61	17.59	Down	-1.41	2.46e-06	4.29e-05	4922505G16Rik	NM_001039557	-	157034285	157105284	Genebody	41033.5	NA	NA	NA	NA
chr7	127813201	127815200	2Kb_5569	MDKO_M_1875	2000	12.19	25.05	Down	-1.04	1.39e-05	0.000146499	4930408O21Rik	NM_001040136	-	127802809	127813856	Promoter1k	-344.5	NA	NA	NA	NA
chr14	9288501	9295000	5Kb_1132	MDKO_M_602	6500	34.79	70.25	Down	-1.01	9.32e-09	1.49e-07	4930452B06Rik	NM_028934	-	9263685	9498803	Genebody	207052	NA	NA	NA	NA
chr4	135055701	135056700	1kb_5057	MDKO_M_1408	1000	4.37	13.8	Down	-1.66	1.45e-05	0.000204051	4930555I21Rik	NM_030189	+	135051901	135093717	Genebody	4299.5	NA	NA	NA	NA
chr5	3848401	3849400	1kb_5144	MDKO_M_1537	1000	5.01	13.46	Down	-1.43	5.5e-05	0.00064034	4932412H11Rik	NM_172879	+	3845172	3866595	Genebody	3728.5	NA	NA	NA	NA
chr2	68570401	68572400	2Kb_3360	MDKO_M_1105	2000	12.59	25.15	Down	-1	9.55e-05	0.000787722	4932414N04Rik	NM_183113	+	68495940	68586521	Genebody	75460.5	NA	NA	NA	NA
chr16	50727501	50732500	5Kb_1510	MDKO_M_782	5000	26.07	60.05	Down	-1.2	7.14e-10	1.46e-08	5330426P16Rik	NR_028300	-	50726863	50732885	Promoter3k	2884.5	NA	NA	NA	NA
chr15	44502001	44528000	10Kb_952	MDKO_M_680	26000	131.86	309.43	Down	-1.23	7.48e-11	1.8e-09	5730410E15Rik	NM_178765	-	44503402	44584003	Genebody	69002.5	NA	NA	NA	NA
chr15	44618001	44619300	1kb_2437	MDKO_M_681	1300	13.52	29.59	Down	-1.13	4.49e-05	0.000539755	5730410E15Rik	NM_001032727	-	44503402	44619608	Promoter1k	957.5	NA	NA	NA	NA
chr7	147453001	147475000	10Kb_2619	MDKO_M_1896	22000	95.48	243.56	Down	-1.35	3.16e-11	1.6e-09	5830411N06Rik	NM_175533	+	147433199	147483539	Genebody	30801.5	NA	NA	NA	NA
chr9	107885401	107888600	2Kb_6488	MDKO_M_2110	3200	10.07	39.21	Down	-1.96	3.92e-13	5e-10	6230427J02Rik	NM_026597	-	107886556	107888246	Promoter3k	1245.5	NA	NA	NA	NA
chr5	150231001	150232000	1kb_5673	MDKO_M_1538	1000	7.28	16.18	Down	-1.15	6.26e-05	0.000714297	6330406I15Rik	NM_027519	+	150214380	150234277	Genebody	17120.5	NA	NA	NA	NA
chr5	138170601	138172800	2Kb_4872	MDKO_M_1540	2200	13.81	27.75	Down	-1.01	4.13e-05	0.00038287	6430598A04Rik	NM_175521	-	138172190	138181225	Genebody	9524.5	NA	NA	NA	NA
chr2	153271001	153273400	2Kb_3608	MDKO_M_1110	2400	16.52	34.76	Down	-1.07	4.9e-06	5.74e-05	8430427H17Rik	NM_001134300	-	153233197	153355706	Genebody	83505.5	NA	NA	NA	NA
chr9	40559801	40560800	1kb_7170	MDKO_M_2111	1000	5.46	14.38	Down	-1.4	6.4e-05	0.000727623	9030425E11Rik	NM_133733	+	40494046	40592128	Genebody	66254.5	NA	NA	NA	NA
chr9	40570801	40573600	2Kb_6163	MDKO_M_2112	2800	15.39	30.96	Down	-1.01	8.93e-07	1.22e-05	9030425E11Rik	NM_133733	+	40494046	40592128	Genebody	78154.5	NA	NA	NA	NA
chr9	22235801	22236800	1kb_7103	MDKO_M_2113	1000	5.35	13.41	Down	-1.33	5.5e-05	0.00064034	9530077C05Rik	NM_026739	+	22216020	22249122	Genebody	20280.5	NA	NA	NA	NA
chr16	6343001	6382000	10Kb_1061	MDKO_M_784	39000	223.35	493.88	Down	-1.14	1.6e-09	2.01e-08	A2bp1	NM_021477	+	5884885	7412571	Genebody	477616	NA	NA	NA	NA
chr16	7145401	7147800	2Kb_2301	MDKO_M_785	2400	14.4	31.28	Down	-1.12	1.94e-07	3e-06	A2bp1	NM_183188	+	7069927	7412571	Genebody	76673.5	NA	NA	NA	NA
chr2	118589001	118591800	2Kb_3481	MDKO_M_1111	2800	15.06	33.04	Down	-1.13	2.14e-07	3.28e-06	A430105I19Rik	NM_001001982	-	118579880	118588396	Promoter3k	-2004.5	NA	NA	NA	NA
chr2	25049801	25053200	2Kb_3234	MDKO_M_1112	3400	17.16	41.01	Down	-1.26	9.89e-09	2e-07	A830007P12Rik	NM_146115	-	25048239	25052132	Promoter1k	631.5	NA	NA	NA	NA
chr5	99762401	99765200	2Kb_4672	MDKO_M_1542	2800	13.3	33.05	Down	-1.31	1.61e-08	3.11e-07	A930011G23Rik	NR_030692	-	99726262	100158078	Genebody	394278	NA	NA	NA	NA
chr7	127493501	127494700	1kb_6454	MDKO_M_1871	1200	6.22	16.2	Down	-1.38	1.16e-05	0.000167778	Abca15	NM_177213	+	127472197	127551200	Genebody	21903.5	NA	NA	NA	NA
chr7	127613001	127627000	10Kb_2573	MDKO_M_1872	14000	67.22	134.91	Down	-1	1.89e-10	3.22e-09	Abca16	NR_024051	+	127565214	127688324	Genebody	54786.5	NA	NA	NA	NA
chr14	119051501	119084000	5Kb_1254	MDKO_M_607	32500	173.46	511.09	Down	-1.56	2.26e-09	4.13e-08	Abcc4	NM_001163675	-	118881913	119076152	Genebody	8401.5	NA	NA	NA	NA
chr14	119087001	119124000	5Kb_1255	MDKO_M_608	37000	227.19	510.23	Down	-1.17	3.66e-10	8.15e-09	Abcc4	NM_001163676	-	118881913	119105440	ProximalPromoter	-60.5	NA	NA	NA	NA
chr16	20425001	20427000	2Kb_2326	MDKO_M_788	2000	5.62	25.61	Down	-2.19	1.15e-11	8.89e-10	Abcc5	NM_176839	-	20400833	20426466	Promoter1k	465.5	NA	NA	NA	NA
chr17	31189001	31204000	10Kb_1179	MDKO_M_863	15000	43.35	124.49	Down	-1.52	1.19e-11	1.6e-09	Abcg1	NM_009593	+	31194638	31254925	Promoter3k	1862.5	NA	NA	NA	NA
chr1	60464501	60472000	5Kb_52	MDKO_M_16	7500	27.83	71.01	Down	-1.35	2.97e-12	1.15e-09	Abi2	NM_198127	+	60466641	60538001	Promoter3k	1609.5	NA	NA	NA	NA
chr10	106452701	106453700	1kb_802	MDKO_M_178	1000	2.52	13.24	Down	-2.4	1.32e-08	3.9e-07	Acss3	NM_198636	-	106402137	106560719	Genebody	107518	NA	NA	NA	NA
chr10	106464201	106466600	2Kb_702	MDKO_M_179	2400	7.41	33.4	Down	-2.17	2.21e-08	4.17e-07	Acss3	NM_198636	-	106402137	106560719	Genebody	95318.5	NA	NA	NA	NA
chr10	106472501	106473700	1kb_806	MDKO_M_180	1200	5.45	17.01	Down	-1.64	4.87e-07	1.01e-05	Acss3	NM_198636	-	106402137	106560719	Genebody	87618.5	NA	NA	NA	NA
chr10	106456001	106461000	5Kb_422	MDKO_M_181	5000	24.36	61.47	Down	-1.34	2.42e-08	3.59e-07	Acss3	NM_198636	-	106402137	106560719	Genebody	102218	NA	NA	NA	NA
chr7	141240001	141245500	5Kb_3499	MDKO_M_1889	5500	27.64	65.5	Down	-1.24	3.03e-08	4.42e-07	Adam12	NM_007400	-	141074882	141416779	Genebody	174028	NA	NA	NA	NA
chr11	45861001	45881000	10Kb_381	MDKO_M_302	20000	108.32	218.18	Down	-1.01	3.43e-11	1.6e-09	Adam19	NM_009616	+	45869488	45960843	Promoter3k	1512.5	NA	NA	NA	NA
chr3	97960401	97963200	2Kb_3888	MDKO_M_1278	2800	15.39	36.24	Down	-1.24	5.4e-07	7.69e-06	Adam30	NM_027665	+	97964734	97967095	Promoter3k	-2933.5	NA	NA	NA	NA
chr16	85802001	85808000	5Kb_1535	MDKO_M_792	6000	32.15	65.89	Down	-1.04	3.89e-10	8.56e-09	Adamts1	NM_009621	-	85794072	85803359	Promoter3k	-1641.5	NA	NA	NA	NA
chr15	11100001	11102800	2Kb_2057	MDKO_M_685	2800	8.66	30.42	Down	-1.81	1.01e-11	8.38e-10	Adamts12	NM_175501	+	10994544	11276621	Genebody	106856	NA	NA	NA	NA
chr15	11099001	11149000	10Kb_938	MDKO_M_686	50000	227.65	642.57	Down	-1.5	7.35e-09	8.16e-08	Adamts12	NM_175501	+	10994544	11276621	Genebody	129456	NA	NA	NA	NA
chr15	11095001	11097400	2Kb_2056	MDKO_M_687	2400	11.79	29.43	Down	-1.32	2.15e-06	2.72e-05	Adamts12	NM_175501	+	10994544	11276621	Genebody	101656	NA	NA	NA	NA
chr15	11161001	11181000	10Kb_939	MDKO_M_688	20000	85.13	211.15	Down	-1.31	1.34e-10	2.5e-09	Adamts12	NM_175501	+	10994544	11276621	Genebody	176456	NA	NA	NA	NA
chr1	166379001	166396000	10Kb_164	MDKO_M_135	17000	150.66	58.51	Up	1.36	1.46e-11	1.6e-09	Atp1b1	NM_009721	-	166367397	166388485	Promoter1k	984.5	NA	NA	NA	NA
chr1	166112601	166114800	2Kb_364	MDKO_M_136	2200	24.48	9.69	Up	1.34	5.89e-07	8.35e-06	F5	NM_007976	+	166081989	166150404	Genebody	31711.5	NA	NA	NA	NA
chr1	166147701	166149000	1kb_421	MDKO_M_137	1300	17.66	4.76	Up	1.89	2.98e-06	5.08e-05	F5	NM_007976	+	166081989	166150404	Genebody	66361.5	NA	NA	NA	NA
chr1	71697001	71704000	5Kb_61	MDKO_M_138	7000	65.3	21.37	Up	1.61	2.52e-12	1.15e-09	Fn1	NM_010233	-	71632096	71699744	Promoter1k	-756.5	NA	NA	NA	NA
chr1	59540301	59541300	1kb_79	MDKO_M_139	1000	13.2	3.43	Up	1.94	8.3e-07	1.63e-05	Fzd7	NM_008057	+	59538990	59543798	Promoter3k	1810.5	NA	NA	NA	NA
chr1	135206801	135207800	1kb_312	MDKO_M_140	1000	11.96	3.02	Up	1.98	3.77e-06	6.25e-05	Golt1a	NM_026680	+	135206399	135219602	Promoter1k	901.5	NA	NA	NA	NA
chr1	138156301	138157500	1kb_335	MDKO_M_141	1200	29.05	12.53	Up	1.21	4.42e-05	0.000533385	Gpr25	NM_001101516	-	138155491	138157449	Promoter1k	548.5	NA	NA	NA	NA
chr1	72869501	72876000	5Kb_63	MDKO_M_142	6500	79.92	34.39	Up	1.22	1.48e-08	2.27e-07	Igfbp2	NM_008342	+	72871076	72899044	Promoter3k	1674.5	NA	NA	NA	NA
chr1	194971001	194997000	10Kb_213	MDKO_M_143	26000	251.17	118.85	Up	1.08	3.62e-11	1.6e-09	Irf6	NM_016851	+	194979305	194998228	Genebody	4695.5	NA	NA	NA	NA
chr1	72257201	72259400	2Kb_112	MDKO_M_144	2200	31.81	11.84	Up	1.43	1.44e-07	2.28e-06	Mreg	NM_001005423	-	72205807	72258880	Promoter1k	579.5	NA	NA	NA	NA
chr1	89396001	89417000	10Kb_85	MDKO_M_145	21000	227.46	88.68	Up	1.36	9.18e-11	1.98e-09	Ngef	NM_019867	-	89373403	89406936	Promoter1k	435.5	NA	NA	NA	NA
chr1	89458801	89459800	1kb_188	MDKO_M_146	1000	12.02	4.23	Up	1.51	9.04e-05	0.000960417	Ngef	NM_001111314	-	89373403	89470444	Genebody	11143.5	NA	NA	NA	NA
chr1	138840001	138858000	10Kb_142	MDKO_M_147	18000	193.76	55.93	Up	1.79	4.49e-11	1.6e-09	Nr5a2	NM_001159769	-	138740160	138850206	Promoter3k	1205.5	NA	NA	NA	NA
chr1	133693801	133695800	2Kb_271	MDKO_M_149	2000	28.87	6.87	Up	2.07	3.05e-08	5.58e-07	Pm20d1	NM_178079	+	133693971	133714691	Promoter1k	829.5	NA	NA	NA	NA
chr1	191985001	192008000	10Kb_206	MDKO_M_150	23000	254.28	78.36	Up	1.7	1.89e-10	3.22e-09	Prox1	NM_008937	-	191945657	191994558	Promoter3k	-1942.5	NA	NA	NA	NA
chr1	92863301	92864300	1kb_223	MDKO_M_151	1000	12.45	3.64	Up	1.77	1.08e-05	0.000158363	Rab17	NM_001159725	-	92854710	92864243	Promoter1k	442.5	NA	NA	NA	NA
chr1	107251001	107256000	5Kb_121	MDKO_M_152	5000	57.1	18.9	Up	1.6	1.54e-12	1.15e-09	Rnf152	NM_001160368	-	107173495	107253286	ProximalPromoter	-214.5	NA	NA	NA	NA
chr1	187275501	187280500	5Kb_258	MDKO_M_153	5000	60.35	17.57	Up	1.78	1.3e-09	2.5e-08	Slc30a10	NM_001033286	+	187278726	187292639	Promoter1k	-725.5	NA	NA	NA	NA
chr1	184885001	184890000	5Kb_250	MDKO_M_154	5000	55.28	24.68	Up	1.16	4.14e-05	0.00035424	Tlr5	NM_016928	+	184884918	184906174	Promoter3k	2582.5	NA	NA	NA	NA
chr1	72331801	72335400	2Kb_113	MDKO_M_155	3600	42.38	13.49	Up	1.65	8.66e-13	5e-10	Tmem169	NM_175564	+	72330946	72349568	Promoter3k	2654.5	NA	NA	NA	NA
chr1	135077101	135078300	1kb_311	MDKO_M_156	1200	18.59	7.07	Up	1.4	3.82e-05	0.000470673	0	0	0	0	0	OtherIntergenic	NA	NA	NA	NA	NA
chr1	44254401	44255400	1kb_64	MDKO_M_157	1000	12.49	4	Up	1.64	5.27e-05	0.000619916	0	0	0	0	0	OtherIntergenic	NA	NA	NA	NA	NA
chr1	133020101	133021500	1kb_302	MDKO_M_158	1400	18.85	5.75	Up	1.71	4.81e-08	1.25e-06	0	0	0	0	0	OtherIntergenic	NA	NA	NA	NA	NA
chr10	33529501	33530600	1kb_599	MDKO_M_159	1100	2.6	17.63	Down	-2.76	2.66e-09	9.48e-08	0	0	0	0	0	OtherIntergenic	NA	NA	NA	NA	NA
chr10	37116901	37118000	1kb_630	MDKO_M_160	1100	2.66	17.04	Down	-2.68	1.86e-09	6.95e-08	0	0	0	0	0	Genedesert	NA	NA	NA	NA	NA
chr10	123653201	123656000	2Kb_730	MDKO_M_161	2800	5.98	31.98	Down	-2.42	2.87e-10	8.81e-09	0	0	0	0	0	OtherIntergenic	NA	NA	NA	NA	NA
chr10	123277201	123278800	1kb_834	MDKO_M_162	1600	4.78	22.03	Down	-2.2	8.66e-10	3.62e-08	0	0	0	0	0	OtherIntergenic	NA	NA	NA	NA	NA
chr10	33539101	33540200	1kb_600	MDKO_M_163	1100	3.55	15.17	Down	-2.1	3.14e-07	6.83e-06	0	0	0	0	0	OtherIntergenic	NA	NA	NA	NA	NA
chr10	110468301	110469300	1kb_817	MDKO_M_164	1000	3.54	13.32	Down	-1.91	3.29e-06	5.53e-05	0	0	0	0	0	OtherIntergenic	NA	NA	NA	NA	NA
chr15	11229501	11234500	5Kb_1283	MDKO_M_689	5000	21.33	50	Down	-1.23	2.15e-11	1.24e-09	Adamts12	NM_175501	+	10994544	11276621	Genebody	237456	NA	NA	NA	NA
chr10	33501001	33513000	10Kb_234	MDKO_M_166	12000	33.95	120.49	Down	-1.83	3.47e-12	1.6e-09	0	0	0	0	0	OtherIntergenic	NA	NA	NA	NA	NA
chr10	100505601	100506900	1kb_796	MDKO_M_167	1300	5.78	19.58	Down	-1.76	4.87e-07	1.02e-05	0	0	0	0	0	Genedesert	NA	NA	NA	NA	NA
chr10	33519401	33521800	2Kb_521	MDKO_M_168	2400	7.46	24.49	Down	-1.71	3.42e-10	1.02e-08	0	0	0	0	0	OtherIntergenic	NA	NA	NA	NA	NA
chr10	86824001	86841000	10Kb_294	MDKO_M_170	17000	50.46	159.04	Down	-1.66	3.83e-11	1.6e-09	0	0	0	0	0	OtherIntergenic	NA	NA	NA	NA	NA
chr10	23383801	23385300	1kb_570	MDKO_M_171	1500	5.62	17.77	Down	-1.66	9.36e-08	2.28e-06	0	0	0	0	0	OtherIntergenic	NA	NA	NA	NA	NA
chr10	123652001	123667000	10Kb_323	MDKO_M_172	15000	47.4	148.99	Down	-1.65	1.64e-11	1.6e-09	0	0	0	0	0	OtherIntergenic	NA	NA	NA	NA	NA
chr10	99607001	99609400	2Kb_691	MDKO_M_173	2400	10.05	31.21	Down	-1.64	4.11e-11	1.84e-09	0	0	0	0	0	OtherIntergenic	NA	NA	NA	NA	NA
chr10	19222601	19224800	2Kb_482	MDKO_M_174	2200	8.63	26.81	Down	-1.64	2.29e-10	7.25e-09	0	0	0	0	0	OtherIntergenic	NA	NA	NA	NA	NA
chr10	78094001	78095200	1kb_697	MDKO_M_175	1200	6.02	18.32	Down	-1.61	2.71e-07	5.97e-06	0	0	0	0	0	OtherIntergenic	NA	NA	NA	NA	NA
chr10	30005001	30015000	10Kb_231	MDKO_M_176	10000	37.15	109.45	Down	-1.56	2.83e-09	3.38e-08	0	0	0	0	0	OtherIntergenic	NA	NA	NA	NA	NA
chr10	25077001	25085000	5Kb_304	MDKO_M_177	8000	27.69	81.79	Down	-1.56	2.1e-12	1.15e-09	0	0	0	0	0	OtherIntergenic	NA	NA	NA	NA	NA
chr15	11177601	11179600	2Kb_2065	MDKO_M_690	2000	10.09	22.68	Down	-1.17	2.1e-06	2.67e-05	Adamts12	NM_175501	+	10994544	11276621	Genebody	184056	NA	NA	NA	NA
chr15	11193001	11227000	10Kb_940	MDKO_M_691	34000	166.03	363.26	Down	-1.13	1.24e-10	2.38e-09	Adamts12	NM_175501	+	10994544	11276621	Genebody	215456	NA	NA	NA	NA
chr11	50442001	50494000	10Kb_383	MDKO_M_305	52000	288.94	610.38	Down	-1.08	5.14e-10	7.33e-09	Adamts2	NM_175643	+	50415586	50617550	Genebody	52414.5	NA	NA	NA	NA
chr5	90152801	90154000	1kb_5342	MDKO_M_1548	1200	6.19	18.26	Down	-1.56	3.13e-06	5.29e-05	Adamts3	NM_001081401	-	90105945	90312430	Genebody	159030	NA	NA	NA	NA
chr10	106608001	106625000	10Kb_314	MDKO_M_182	17000	63.78	178.85	Down	-1.49	7.04e-10	9.65e-09	0	0	0	0	0	OtherIntergenic	NA	NA	NA	NA	NA
chr10	24847201	24850000	2Kb_506	MDKO_M_183	2800	14.3	40.06	Down	-1.49	3.95e-10	1.15e-08	0	0	0	0	0	OtherIntergenic	NA	NA	NA	NA	NA
chr10	67332001	67333000	1kb_677	MDKO_M_184	1000	6.32	17.71	Down	-1.49	2.45e-05	0.000321257	0	0	0	0	0	OtherIntergenic	NA	NA	NA	NA	NA
chr10	39377601	39378600	1kb_632	MDKO_M_185	1000	4.99	13.99	Down	-1.49	3.51e-05	0.00043704	0	0	0	0	0	OtherIntergenic	NA	NA	NA	NA	NA
chr10	25111001	25130000	10Kb_228	MDKO_M_186	19000	70.47	188.81	Down	-1.42	7.81e-11	1.82e-09	0	0	0	0	0	OtherIntergenic	NA	NA	NA	NA	NA
chr10	77563301	77564300	1kb_687	MDKO_M_187	1000	5.07	13.57	Down	-1.42	2.78e-05	0.000357096	0	0	0	0	0	OtherIntergenic	NA	NA	NA	NA	NA
chr10	80384501	80385500	1kb_712	MDKO_M_188	1000	5.64	14.91	Down	-1.4	2.19e-05	0.000291354	0	0	0	0	0	OtherIntergenic	NA	NA	NA	NA	NA
chr10	86779001	86816000	10Kb_293	MDKO_M_189	37000	192.7	504.18	Down	-1.39	1.11e-10	2.21e-09	0	0	0	0	0	OtherIntergenic	NA	NA	NA	NA	NA
chr10	44717201	44720000	2Kb_553	MDKO_M_190	2800	12.96	34.05	Down	-1.39	3.83e-08	6.87e-07	0	0	0	0	0	OtherIntergenic	NA	NA	NA	NA	NA
chr10	10113701	10114700	1kb_543	MDKO_M_191	1000	5.83	15.24	Down	-1.39	7.48e-06	0.000114181	0	0	0	0	0	OtherIntergenic	NA	NA	NA	NA	NA
chr10	86845201	86846200	1kb_749	MDKO_M_192	1000	5.02	13.05	Down	-1.38	4.46e-05	0.000536931	0	0	0	0	0	OtherIntergenic	NA	NA	NA	NA	NA
chr5	90150201	90151200	1kb_5341	MDKO_M_1549	1000	4.88	13.07	Down	-1.42	1.87e-05	0.000254266	Adamts3	NM_001081401	-	90105945	90312430	Genebody	161730	NA	NA	NA	NA
chr10	90762001	90763400	1kb_763	MDKO_M_194	1400	7.59	19.61	Down	-1.37	4.29e-07	9.05e-06	0	0	0	0	0	OtherIntergenic	NA	NA	NA	NA	NA
chr10	93901001	93973000	10Kb_303	MDKO_M_195	72000	335.72	859.77	Down	-1.36	1.19e-09	1.54e-08	0	0	0	0	0	OtherIntergenic	NA	NA	NA	NA	NA
chr10	107375201	107377400	2Kb_705	MDKO_M_196	2200	11.25	28.95	Down	-1.36	4.67e-08	8.2e-07	0	0	0	0	0	OtherIntergenic	NA	NA	NA	NA	NA
chr10	40717201	40718200	1kb_635	MDKO_M_197	1000	5.69	14.64	Down	-1.36	1.79e-05	0.000245629	0	0	0	0	0	OtherIntergenic	NA	NA	NA	NA	NA
chr10	98204501	98210000	5Kb_412	MDKO_M_198	5500	23.68	59.66	Down	-1.33	2.5e-12	1.15e-09	0	0	0	0	0	Genedesert	NA	NA	NA	NA	NA
chr5	90155001	90166000	10Kb_2163	MDKO_M_1551	11000	55.28	123.57	Down	-1.16	1.51e-08	1.59e-07	Adamts3	NM_001081401	-	90105945	90312430	Genebody	151930	NA	NA	NA	NA
chr1	173180201	173182600	2Kb_386	MDKO_M_23	2400	12.92	35.2	Down	-1.45	2.11e-07	3.24e-06	Adamts4	NM_172845	+	173180552	173190052	Promoter1k	848.5	NA	NA	NA	NA
chr5	139757001	139759200	2Kb_4876	MDKO_M_1553	2200	16.64	33.18	Down	-1	2.63e-05	0.000257562	Adap1	NM_172723	-	139747829	139801417	Genebody	43316.5	NA	NA	NA	NA
chr12	4189401	4190400	1kb_1477	MDKO_M_438	1000	2.56	13.48	Down	-2.4	5.78e-09	1.87e-07	Adcy3	NM_138305	+	4134152	4213523	Genebody	55748.5	NA	NA	NA	NA
chr10	87070801	87071800	1kb_753	MDKO_M_203	1000	6.24	15.41	Down	-1.3	6.75e-05	0.000760191	0	0	0	0	0	OtherIntergenic	NA	NA	NA	NA	NA
chr10	25859401	25860500	1kb_586	MDKO_M_204	1100	6.05	14.76	Down	-1.29	6.14e-05	0.00070413	0	0	0	0	0	OtherIntergenic	NA	NA	NA	NA	NA
chr10	120181401	120183400	2Kb_724	MDKO_M_205	2000	10.1	24.45	Down	-1.28	2.57e-07	3.87e-06	0	0	0	0	0	OtherIntergenic	NA	NA	NA	NA	NA
chr16	35159101	35160100	1kb_2767	MDKO_M_795	1000	9.36	20.39	Down	-1.12	3.69e-05	0.000457039	Adcy5	NM_001012765	+	35155721	35304634	Genebody	3879.5	NA	NA	NA	NA
chr10	37062401	37065400	2Kb_532	MDKO_M_207	3000	15.21	36.73	Down	-1.27	3.92e-10	1.15e-08	0	0	0	0	0	Genedesert	NA	NA	NA	NA	NA
chr18	61940601	61942600	2Kb_2868	MDKO_M_947	2000	15.67	31.96	Down	-1.03	1.79e-05	0.000183055	Afap1l1	NM_178928	-	61889915	61946315	Genebody	4714.5	NA	NA	NA	NA
chr10	83908601	83909800	1kb_728	MDKO_M_209	1200	7.39	17.74	Down	-1.26	2.5e-05	0.000325884	0	0	0	0	0	OtherIntergenic	NA	NA	NA	NA	NA
chr10	53581101	53582100	1kb_658	MDKO_M_210	1000	5.98	14.34	Down	-1.26	7.52e-05	0.000829996	0	0	0	0	0	OtherIntergenic	NA	NA	NA	NA	NA
chr10	55663201	55664200	1kb_662	MDKO_M_211	1000	6.37	15.16	Down	-1.25	6.22e-05	0.000711763	0	0	0	0	0	Genedesert	NA	NA	NA	NA	NA
chr10	55639001	55660000	10Kb_253	MDKO_M_212	21000	97.66	230.76	Down	-1.24	4.36e-11	1.6e-09	0	0	0	0	0	Genedesert	NA	NA	NA	NA	NA
chr10	37076001	37086000	10Kb_241	MDKO_M_213	10000	42.66	100.88	Down	-1.24	1.07e-11	1.6e-09	0	0	0	0	0	Genedesert	NA	NA	NA	NA	NA
chr19	57018201	57020200	2Kb_3166	MDKO_M_1026	2000	9.95	24.04	Down	-1.27	3.87e-07	5.7e-06	Afap1l2	NM_146102	-	56986848	57082666	Genebody	63465.5	NA	NA	NA	NA
chr10	19165401	19166800	1kb_548	MDKO_M_215	1400	7.5	17.57	Down	-1.23	1.35e-05	0.000192335	0	0	0	0	0	OtherIntergenic	NA	NA	NA	NA	NA
chr10	100663001	100676000	10Kb_310	MDKO_M_216	13000	52.49	122.66	Down	-1.22	9.93e-12	1.6e-09	0	0	0	0	0	Genedesert	NA	NA	NA	NA	NA
chr10	117540201	117542200	2Kb_720	MDKO_M_217	2000	10.35	24.12	Down	-1.22	3.66e-06	4.43e-05	0	0	0	0	0	OtherIntergenic	NA	NA	NA	NA	NA
chr10	107475001	107481000	5Kb_425	MDKO_M_218	6000	30.78	71.29	Down	-1.21	7.21e-10	1.47e-08	0	0	0	0	0	OtherIntergenic	NA	NA	NA	NA	NA
chr10	23390001	23425000	10Kb_226	MDKO_M_219	35000	187.47	431.15	Down	-1.2	5.72e-10	8.04e-09	0	0	0	0	0	OtherIntergenic	NA	NA	NA	NA	NA
chr10	97993001	98009000	10Kb_306	MDKO_M_220	16000	68.52	157.4	Down	-1.2	1.29e-11	1.6e-09	0	0	0	0	0	Genedesert	NA	NA	NA	NA	NA
chr10	20557801	20560200	2Kb_489	MDKO_M_221	2400	12.63	29.07	Down	-1.2	1.07e-05	0.00011628	0	0	0	0	0	OtherIntergenic	NA	NA	NA	NA	NA
chr8	54595201	54596400	1kb_6767	MDKO_M_2007	1200	6.28	15.89	Down	-1.34	1.71e-05	0.000235259	Aga	NM_001005847	+	54597079	54608775	Promoter3k	-1278.5	NA	NA	NA	NA
chr10	92891001	92898000	5Kb_399	MDKO_M_223	7000	33.57	75.89	Down	-1.18	1.34e-10	3.56e-09	0	0	0	0	0	OtherIntergenic	NA	NA	NA	NA	NA
chr10	94550401	94552400	2Kb_681	MDKO_M_224	2000	10.77	24.45	Down	-1.18	1.84e-06	2.38e-05	0	0	0	0	0	OtherIntergenic	NA	NA	NA	NA	NA
chr10	51749901	51750900	1kb_654	MDKO_M_225	1000	6.9	15.59	Down	-1.18	6.75e-05	0.000760191	0	0	0	0	0	OtherIntergenic	NA	NA	NA	NA	NA
chr19	7457901	7458900	1kb_3463	MDKO_M_1027	1000	4.08	14.57	Down	-1.84	1.07e-05	0.000157037	AI846148	NM_001167831	-	7447712	7457515	Promoter1k	-885.5	NA	NA	NA	NA
chr10	110448001	110453000	5Kb_429	MDKO_M_227	5000	29.48	65.29	Down	-1.15	5.28e-08	7.38e-07	0	0	0	0	0	OtherIntergenic	NA	NA	NA	NA	NA
chr10	13559001	13565000	5Kb_286	MDKO_M_193	6000	24.96	62.48	Down	-1.32	2.06e-09	3.79e-08	Aig1	NM_025446	-	13372514	13588635	Genebody	26634.5	NA	NA	NA	NA
chr10	98295001	98312000	10Kb_307	MDKO_M_229	17000	78.32	168.19	Down	-1.1	2.14e-11	1.6e-09	0	0	0	0	0	Genedesert	NA	NA	NA	NA	NA
chr10	107851001	107864000	10Kb_315	MDKO_M_230	13000	63.11	135.52	Down	-1.1	1.95e-09	2.4e-08	0	0	0	0	0	OtherIntergenic	NA	NA	NA	NA	NA
chr11	71848901	71849900	1kb_1166	MDKO_M_307	1000	7.93	17.78	Down	-1.16	2.89e-05	0.000369508	Aipl1	NM_053245	-	71842223	71851010	Promoter3k	1609.5	NA	NA	NA	NA
chr10	23433501	23438500	5Kb_302	MDKO_M_232	5000	25.08	53.79	Down	-1.1	1.02e-10	2.88e-09	0	0	0	0	0	OtherIntergenic	NA	NA	NA	NA	NA
chr10	120971301	120972300	1kb_827	MDKO_M_233	1000	9.89	21.25	Down	-1.1	4.53e-05	0.000544129	0	0	0	0	0	OtherIntergenic	NA	NA	NA	NA	NA
chr10	13284201	13287000	2Kb_474	MDKO_M_234	2800	16.68	35.42	Down	-1.09	2.63e-06	3.28e-05	0	0	0	0	0	OtherIntergenic	NA	NA	NA	NA	NA
chr10	18839601	18841600	2Kb_477	MDKO_M_235	2000	12.05	25.21	Down	-1.07	2.01e-06	2.56e-05	0	0	0	0	0	OtherIntergenic	NA	NA	NA	NA	NA
chr10	22542601	22543700	1kb_566	MDKO_M_236	1100	8.86	18.56	Down	-1.07	0.000142897	0.00148239	0	0	0	0	0	OtherIntergenic	NA	NA	NA	NA	NA
chr10	24037401	24040400	2Kb_504	MDKO_M_237	3000	19.58	40.66	Down	-1.05	5.93e-08	1.02e-06	0	0	0	0	0	OtherIntergenic	NA	NA	NA	NA	NA
chr10	22674201	22676200	2Kb_496	MDKO_M_238	2000	11.48	23.74	Down	-1.05	9.99e-06	0.000109105	0	0	0	0	0	OtherIntergenic	NA	NA	NA	NA	NA
chr10	91153401	91155400	2Kb_661	MDKO_M_239	2000	12.42	25.57	Down	-1.04	1.13e-05	0.000121675	0	0	0	0	0	OtherIntergenic	NA	NA	NA	NA	NA
chr10	125766401	125768600	2Kb_733	MDKO_M_240	2200	13.59	27.84	Down	-1.03	7.15e-06	8.08e-05	0	0	0	0	0	OtherIntergenic	NA	NA	NA	NA	NA
chr10	96213001	96215200	2Kb_682	MDKO_M_241	2200	13.28	27.14	Down	-1.03	4.02e-06	4.8e-05	0	0	0	0	0	OtherIntergenic	NA	NA	NA	NA	NA
chr10	99608001	99624000	10Kb_309	MDKO_M_242	16000	77.07	156.82	Down	-1.02	1.66e-11	1.6e-09	0	0	0	0	0	OtherIntergenic	NA	NA	NA	NA	NA
chr10	66274601	66277000	2Kb_574	MDKO_M_243	2400	16.68	33.25	Down	-1	3.54e-05	0.000334643	0	0	0	0	0	Genedesert	NA	NA	NA	NA	NA
chr10	44471801	44474000	2Kb_551	MDKO_M_244	2200	14.76	29.58	Down	-1	4.16e-06	4.96e-05	0	0	0	0	0	OtherIntergenic	NA	NA	NA	NA	NA
chr4	57893001	57899500	5Kb_2611	MDKO_M_1427	6500	29.88	75.55	Down	-1.34	4e-12	1.15e-09	Akap2	NM_009649	+	57867031	57909855	Genebody	29219.5	NA	NA	NA	NA
chr10	19411401	19413400	2Kb_483	MDKO_M_246	2000	13.16	26.25	Down	-1	1.64e-05	0.000169647	0	0	0	0	0	OtherIntergenic	NA	NA	NA	NA	NA
chr19	40661001	40663000	2Kb_3086	MDKO_M_1028	2000	10.19	22.65	Down	-1.15	1.61e-05	0.000167249	Aldh18a1	NM_153554	-	40624747	40662952	Promoter1k	951.5	NA	NA	NA	NA
chr11	61027001	61108000	10Kb_404	MDKO_M_308	81000	464.94	1009.05	Down	-1.12	4.93e-10	7.08e-09	Aldh3a2	NM_007437	-	61058256	61080628	Genebody	13127.5	NA	NA	NA	NA
chr5	150080701	150081700	1kb_5671	MDKO_M_1559	1000	5.83	14.74	Down	-1.34	6.06e-05	0.000696398	Alox5ap	NM_009663	+	150076633	150099622	Genebody	4567.5	NA	NA	NA	NA
chr3	127397101	127398100	1kb_4561	MDKO_M_1292	1000	6.06	16	Down	-1.4	2.73e-05	0.000353043	Alpk1	NM_027808	-	127373227	127483444	Genebody	85843.5	NA	NA	NA	NA
chr3	127408001	127409000	1kb_4562	MDKO_M_1293	1000	5.5	13.94	Down	-1.34	5.48e-05	0.000639309	Alpk1	NM_027808	-	127373227	127483444	Genebody	74943.5	NA	NA	NA	NA
chr19	4281201	4283400	2Kb_2952	MDKO_M_1030	2200	7.67	30.17	Down	-1.98	2.95e-09	6.69e-08	Ankrd13d	NM_026720	-	4270179	4283136	Promoter1k	835.5	NA	NA	NA	NA
chr9	22191201	22194000	2Kb_6109	MDKO_M_2126	2800	11.84	32.69	Down	-1.47	1.25e-10	4.37e-09	Anln	NM_028390	-	22135657	22193649	Promoter3k	1048.5	NA	NA	NA	NA
chr10	88562001	88564000	2Kb_657	MDKO_M_199	2000	9.15	28.34	Down	-1.63	8.37e-09	1.71e-07	Ano4	NM_178773	-	88411738	88720534	Genebody	157534	NA	NA	NA	NA
chr10	88558001	88568000	10Kb_297	MDKO_M_200	10000	36.28	105.81	Down	-1.54	1.4e-09	1.79e-08	Ano4	NM_178773	-	88411738	88720534	Genebody	157534	NA	NA	NA	NA
chr10	88531201	88533200	2Kb_656	MDKO_M_201	2000	11.12	25.93	Down	-1.22	2.44e-06	3.06e-05	Ano4	NM_178773	-	88411738	88720534	Genebody	188334	NA	NA	NA	NA
chr10	88519001	88521800	2Kb_655	MDKO_M_202	2800	13.37	30	Down	-1.17	6.29e-07	8.87e-06	Ano4	NM_178773	-	88411738	88720534	Genebody	200134	NA	NA	NA	NA
chr15	95622001	95627000	5Kb_1400	MDKO_M_700	5000	25.6	55.05	Down	-1.1	4.23e-10	9.18e-09	Ano6	NM_175344	+	95621273	95805181	Genebody	3227.5	NA	NA	NA	NA
chr9	69298501	69306500	5Kb_3964	MDKO_M_2127	8000	29.65	104.21	Down	-1.81	1.45e-09	2.75e-08	Anxa2	NM_007585	+	69301489	69339591	Promoter3k	1011.5	NA	NA	NA	NA
chr19	23890401	23892400	2Kb_3015	MDKO_M_1032	2000	14.05	28.42	Down	-1.02	2.51e-05	0.00024755	Apba1	NM_177034	+	23833365	24024086	Genebody	58035.5	NA	NA	NA	NA
chr9	66642101	66643100	1kb_7402	MDKO_M_2129	1000	5.37	15.73	Down	-1.55	5.42e-05	0.000633226	Aph1b	NM_177583	-	66623293	66643229	Promoter1k	628.5	NA	NA	NA	NA
chr4	148503001	148508000	5Kb_2785	MDKO_M_1432	5000	22.2	57.06	Down	-1.36	4.9e-10	1.05e-08	Apitd1	NM_027263	-	148502457	148511708	Genebody	6207.5	NA	NA	NA	NA
chr8	79951001	79952100	1kb_6821	MDKO_M_2017	1100	7	19.68	Down	-1.49	4.79e-06	7.71e-05	Arhgap10	NM_030113	-	79774264	80041805	Genebody	90254.5	NA	NA	NA	NA
chr6	87460601	87462600	2Kb_5110	MDKO_M_1701	2000	10.92	24.55	Down	-1.17	1.18e-06	1.58e-05	Arhgap25	NM_001037727	-	87409378	87483228	Genebody	21627.5	NA	NA	NA	NA
chr16	38642801	38644800	2Kb_2375	MDKO_M_803	2000	11.51	23.99	Down	-1.06	9.99e-06	0.000109105	Arhgap31	NM_020260	-	38598455	38713147	Genebody	69346.5	NA	NA	NA	NA
chr3	88414001	88435000	10Kb_1794	MDKO_M_1298	21000	98.32	245.16	Down	-1.32	9.71e-11	2.04e-09	Arhgef2	NM_008487	+	88425027	88451973	Promoter1k	-526.5	NA	NA	NA	NA
chr3	69025601	69028400	2Kb_3810	MDKO_M_1299	2800	15.69	36.96	Down	-1.24	1.62e-07	2.55e-06	Arl14	NM_027843	+	69026340	69027537	Promoter1k	660.5	NA	NA	NA	NA
chr10	41653001	41658500	5Kb_326	MDKO_M_206	5500	25.12	54.76	Down	-1.12	9.41e-11	2.72e-09	Armc2	NM_001034858	-	41634796	41738187	Genebody	82436.5	NA	NA	NA	NA
chr10	41722201	41724200	2Kb_541	MDKO_M_208	2000	11.7	23.5	Down	-1.01	6.77e-05	0.000586041	Armc2	NM_001034858	-	41634796	41738187	Genebody	14986.5	NA	NA	NA	NA
chr10	39738001	39751000	10Kb_243	MDKO_M_270	13000	119.51	55.55	Up	1.11	1.41e-10	2.58e-09	AI317395	NM_144821	-	39721385	39745073	Promoter1k	572.5	NA	NA	NA	NA
chr10	92997001	93002000	5Kb_400	MDKO_M_271	5000	53.47	20.41	Up	1.39	2.7e-12	1.15e-09	Amdhd1	NM_027908	-	92986082	93002777	Genebody	3276.5	NA	NA	NA	NA
chr10	69385501	69393000	5Kb_352	MDKO_M_272	7500	71.02	18.89	Up	1.91	4.1e-12	1.15e-09	Ank3	NM_170687	+	69388279	69490183	Promoter1k	971.5	NA	NA	NA	NA
chr10	80554301	80555400	1kb_714	MDKO_M_273	1100	13.43	3.26	Up	2.04	2.56e-07	5.68e-06	Creb3l3	NM_145365	-	80547077	80561616	Genebody	6765.5	NA	NA	NA	NA
chr10	128014001	128035000	10Kb_329	MDKO_M_274	21000	217.44	74.78	Up	1.54	2.13e-10	3.53e-09	Erbb3	NM_010153	-	128006423	128026556	Promoter3k	2055.5	NA	NA	NA	NA
chr10	128066501	128074500	5Kb_452	MDKO_M_275	8000	80.05	36.47	Up	1.13	7.7e-08	1.05e-06	Ikzf4	NM_011772	-	128069470	128083048	Genebody	12547.5	NA	NA	NA	NA
chr10	126787501	126795000	5Kb_449	MDKO_M_276	7500	79.89	20.61	Up	1.95	3.12e-11	1.4e-09	Inhbe	NM_008382	-	126786457	126788827	Promoter3k	-2423.5	NA	NA	NA	NA
chr10	106708601	106710800	2Kb_704	MDKO_M_277	2200	26.41	8.38	Up	1.66	2.34e-09	5.45e-08	Lin7a	NM_001039354	+	106708886	106862198	Promoter1k	814.5	NA	NA	NA	NA
chr10	127057001	127058100	1kb_851	MDKO_M_278	1100	17.21	5.43	Up	1.66	7e-06	0.000108019	Lrp1	NM_008512	-	126975213	127058203	Promoter1k	652.5	NA	NA	NA	NA
chr10	19861001	19879000	10Kb_222	MDKO_M_279	18000	171.24	73.97	Up	1.21	1.52e-10	2.73e-09	Mtap7	NM_008635	+	19868725	20001395	Promoter3k	1275.5	NA	NA	NA	NA
chr10	19888001	19895000	5Kb_295	MDKO_M_280	7000	65.05	24.9	Up	1.39	4.58e-12	1.15e-09	Mtap7	NM_008635	+	19868725	20001395	Genebody	22775.5	NA	NA	NA	NA
chr10	110944601	110945600	1kb_818	MDKO_M_281	1000	13.35	4.76	Up	1.49	7.25e-05	0.00080704	Phlda1	NM_009344	+	110943341	110945704	Promoter3k	1759.5	NA	NA	NA	NA
chr10	115629001	115631000	2Kb_715	MDKO_M_282	2000	23.81	11.1	Up	1.1	2.45e-05	0.000242817	Ptprr	NM_001161838	+	115614406	115711984	Genebody	15594.5	NA	NA	NA	NA
chr10	79787001	79809000	10Kb_275	MDKO_M_283	22000	264.96	123.44	Up	1.1	2.28e-09	2.78e-08	Reep6	NM_139292	+	79792914	79799185	Genebody	5086.5	NA	NA	NA	NA
chr10	128105201	128107400	2Kb_748	MDKO_M_285	2200	27.31	9.82	Up	1.48	1.1e-07	1.79e-06	Suox	NM_173733	-	128106942	128110973	Genebody	4672.5	NA	NA	NA	NA
chr10	79897601	79900000	2Kb_612	MDKO_M_286	2400	26.94	7.49	Up	1.85	1.72e-11	1.09e-09	Tcf3	NM_011548	-	79871909	79896397	Promoter3k	-2403.5	NA	NA	NA	NA
chr10	80738001	80754000	10Kb_279	MDKO_M_287	16000	173.04	50.77	Up	1.77	1.06e-09	1.39e-08	Tjp3	NM_013769	-	80735944	80754011	Genebody	8010.5	NA	NA	NA	NA
chr10	81039001	81041000	2Kb_626	MDKO_M_288	2000	24.75	11.74	Up	1.08	1.79e-05	0.000182981	Tle2	NM_019725	+	81038276	81053589	Promoter3k	1724.5	NA	NA	NA	NA
chr10	80334801	80336800	2Kb_615	MDKO_M_289	2000	23.52	9.7	Up	1.28	1.74e-06	2.25e-05	0	0	0	0	0	OtherIntergenic	NA	NA	NA	NA	NA
chr10	79058201	79060200	2Kb_599	MDKO_M_290	2000	25.13	10.17	Up	1.31	4.89e-07	7.02e-06	0	0	0	0	0	OtherIntergenic	NA	NA	NA	NA	NA
chr10	42431001	42442000	10Kb_247	MDKO_M_291	11000	106.64	41.04	Up	1.38	5.67e-12	1.6e-09	0	0	0	0	0	OtherIntergenic	NA	NA	NA	NA	NA
chr10	79814701	79815700	1kb_708	MDKO_M_292	1000	13.86	5.16	Up	1.43	8.8e-05	0.000940393	0	0	0	0	0	OtherIntergenic	NA	NA	NA	NA	NA
chr10	7558001	7560400	2Kb_470	MDKO_M_293	2400	26.18	9.63	Up	1.44	9.67e-08	1.58e-06	Zc3h12d	NM_172785	+	7552267	7590193	Genebody	6933.5	NA	NA	NA	NA
chr7	106681001	106692000	10Kb_2549	MDKO_M_1853	11000	40.08	117.68	Down	-1.55	8.69e-12	1.6e-09	Arrb1	NM_178220	+	106683995	106755280	Promoter3k	2505.5	NA	NA	NA	NA
chr7	106704101	106705100	1kb_6385	MDKO_M_1854	1000	5.28	14.2	Down	-1.43	1.91e-05	0.000258257	Arrb1	NM_178220	+	106683995	106755280	Genebody	20605.5	NA	NA	NA	NA
chr8	12747001	12927000	10Kb_2652	MDKO_M_2023	180000	1334.23	2943.02	Down	-1.14	3.45e-09	4.05e-08	Atp11a	NM_015804	+	12757015	12868727	Genebody	79985.5	NA	NA	NA	NA
chr11	17360901	17361900	1kb_904	MDKO_M_297	1000	4.08	13.08	Down	-1.68	1.69e-06	3.07e-05	0	0	0	0	0	OtherIntergenic	NA	NA	NA	NA	NA
chr11	117800801	117803800	2Kb_1261	MDKO_M_298	3000	11.12	34.12	Down	-1.62	8.38e-11	3.14e-09	0	0	0	0	0	OtherIntergenic	NA	NA	NA	NA	NA
chr11	77453901	77455100	1kb_1197	MDKO_M_299	1200	5.36	15.89	Down	-1.57	4.88e-06	7.82e-05	0	0	0	0	0	OtherIntergenic	NA	NA	NA	NA	NA
chr11	120960701	120961900	1kb_1469	MDKO_M_300	1200	5.68	16.67	Down	-1.55	3.59e-05	0.00044545	0	0	0	0	0	OtherIntergenic	NA	NA	NA	NA	NA
chr11	24444001	24463000	10Kb_352	MDKO_M_301	19000	71.6	201.7	Down	-1.49	6.54e-11	1.72e-09	0	0	0	0	0	Genedesert	NA	NA	NA	NA	NA
chr13	91024701	91025900	1kb_2025	MDKO_M_526	1200	8.61	21.71	Down	-1.33	1.74e-06	3.15e-05	Atp6ap1l	NM_001145879	-	91023054	91044959	Genebody	19658.5	NA	NA	NA	NA
chr11	29491501	29498000	5Kb_480	MDKO_M_303	6500	22.42	61.51	Down	-1.46	1.64e-12	1.15e-09	0	0	0	0	0	OtherIntergenic	NA	NA	NA	NA	NA
chr11	113101601	113102800	1kb_1427	MDKO_M_304	1200	5.38	14.74	Down	-1.46	9.63e-06	0.000142191	0	0	0	0	0	OtherIntergenic	NA	NA	NA	NA	NA
chr5	68221601	68222600	1kb_5292	MDKO_M_1570	1000	4	12.31	Down	-1.62	2.24e-05	0.000297529	Atp8a1	NM_009727	-	68009379	68238669	Genebody	16568.5	NA	NA	NA	NA
chr11	24465001	24483000	10Kb_353	MDKO_M_306	18000	71.92	195.44	Down	-1.44	1.62e-11	1.6e-09	0	0	0	0	0	Genedesert	NA	NA	NA	NA	NA
chr5	68199101	68200100	1kb_5288	MDKO_M_1571	1000	4.35	13.08	Down	-1.59	2.44e-06	4.26e-05	Atp8a1	NM_009727	-	68009379	68238669	Genebody	39068.5	NA	NA	NA	NA
chr5	68193401	68195400	2Kb_4604	MDKO_M_1572	2000	10.28	22.49	Down	-1.13	1.51e-05	0.000157999	Atp8a1	NM_009727	-	68009379	68238669	Genebody	44268.5	NA	NA	NA	NA
chr11	44281001	44337000	10Kb_377	MDKO_M_309	56000	307.79	772.03	Down	-1.33	4.79e-10	6.92e-09	0	0	0	0	0	OtherIntergenic	NA	NA	NA	NA	NA
chr11	37886001	37891000	5Kb_504	MDKO_M_310	5000	21.06	52.7	Down	-1.32	5.62e-12	1.15e-09	0	0	0	0	0	Genedesert	NA	NA	NA	NA	NA
chr11	98788401	98791000	2Kb_1137	MDKO_M_311	2600	15.52	38.05	Down	-1.29	2.9e-07	4.34e-06	0	0	0	0	0	OtherIntergenic	NA	NA	NA	NA	NA
chr11	106226601	106227600	1kb_1394	MDKO_M_312	1000	7.39	18.08	Down	-1.29	6.26e-05	0.000714849	0	0	0	0	0	OtherIntergenic	NA	NA	NA	NA	NA
chr11	117807001	117814000	5Kb_778	MDKO_M_313	7000	29.83	72.37	Down	-1.28	3.04e-12	1.15e-09	0	0	0	0	0	OtherIntergenic	NA	NA	NA	NA	NA
chr11	29499001	29547000	10Kb_355	MDKO_M_314	48000	264.78	629.02	Down	-1.25	2.61e-09	3.14e-08	0	0	0	0	0	OtherIntergenic	NA	NA	NA	NA	NA
chr11	12063001	12166000	10Kb_347	MDKO_M_315	103000	564.07	1323.82	Down	-1.23	2.71e-08	2.76e-07	0	0	0	0	0	OtherIntergenic	NA	NA	NA	NA	NA
chr11	113490601	113492800	2Kb_1231	MDKO_M_316	2200	12.6	28.89	Down	-1.2	5.4e-07	7.69e-06	0	0	0	0	0	OtherIntergenic	NA	NA	NA	NA	NA
chr11	40740901	40741900	1kb_970	MDKO_M_317	1000	8.4	19.33	Down	-1.2	1.62e-05	0.000225227	0	0	0	0	0	Genedesert	NA	NA	NA	NA	NA
chr10	80000701	80001700	1kb_711	MDKO_M_214	1000	5.52	16.24	Down	-1.56	3.86e-06	6.37e-05	Atp8b3	NM_026094	-	79982329	80001868	Promoter1k	667.5	NA	NA	NA	NA
chr11	24485201	24486400	1kb_914	MDKO_M_319	1200	7.16	16.33	Down	-1.19	7.26e-05	0.00080704	0	0	0	0	0	Genedesert	NA	NA	NA	NA	NA
chr11	59351001	59354400	2Kb_909	MDKO_M_320	3400	17.18	39.02	Down	-1.18	1.46e-09	3.62e-08	0	0	0	0	0	OtherIntergenic	NA	NA	NA	NA	NA
chr11	43579801	43582000	2Kb_846	MDKO_M_321	2200	11.08	25.16	Down	-1.18	1.14e-06	1.54e-05	0	0	0	0	0	OtherIntergenic	NA	NA	NA	NA	NA
chr11	94789001	94790000	1kb_1279	MDKO_M_322	1000	9.71	22.05	Down	-1.18	6e-05	0.000692055	0	0	0	0	0	OtherIntergenic	NA	NA	NA	NA	NA
chr11	70150001	70151000	1kb_1164	MDKO_M_323	1000	7.6	17.07	Down	-1.17	8.61e-05	0.000924456	0	0	0	0	0	OtherIntergenic	NA	NA	NA	NA	NA
chr11	101089001	101100000	10Kb_520	MDKO_M_324	11000	48.8	107.29	Down	-1.14	9.15e-12	1.6e-09	0	0	0	0	0	OtherIntergenic	NA	NA	NA	NA	NA
chr5	132591001	132594400	2Kb_4820	MDKO_M_1574	3400	17.89	38.68	Down	-1.11	6.99e-08	1.18e-06	Auts2	NM_177047	-	131913551	133018212	Genebody	425512	NA	NA	NA	NA
chr11	88668601	88669600	1kb_1264	MDKO_M_327	1000	7.35	15.86	Down	-1.11	8.88e-05	0.00094652	0	0	0	0	0	OtherIntergenic	NA	NA	NA	NA	NA
chr11	62720001	62785000	10Kb_411	MDKO_M_328	65000	419.44	900.74	Down	-1.1	5.69e-10	8.01e-09	0	0	0	0	0	OtherIntergenic	NA	NA	NA	NA	NA
chr11	59438001	59440400	2Kb_910	MDKO_M_329	2400	14.91	31.79	Down	-1.09	8.78e-06	9.73e-05	0	0	0	0	0	OtherIntergenic	NA	NA	NA	NA	NA
chr11	110733001	110743000	10Kb_555	MDKO_M_330	10000	48.41	102.43	Down	-1.08	4.65e-12	1.6e-09	0	0	0	0	0	OtherIntergenic	NA	NA	NA	NA	NA
chr11	64018001	64021600	2Kb_965	MDKO_M_331	3600	22.16	46.75	Down	-1.08	8.07e-09	1.65e-07	0	0	0	0	0	OtherIntergenic	NA	NA	NA	NA	NA
chr19	5036201	5038600	2Kb_2958	MDKO_M_1040	2400	16.44	33.6	Down	-1.03	1.23e-05	0.000131786	B3gnt1	NM_175383	+	5038825	5041133	Promoter3k	-1424.5	NA	NA	NA	NA
chr11	102761801	102762800	1kb_1373	MDKO_M_333	1000	8.28	17.54	Down	-1.08	9.67e-05	0.00101616	0	0	0	0	0	OtherIntergenic	NA	NA	NA	NA	NA
chr11	89552801	89554800	2Kb_1084	MDKO_M_334	2000	11.83	24.8	Down	-1.07	4.48e-05	0.000410944	0	0	0	0	0	OtherIntergenic	NA	NA	NA	NA	NA
chr11	111511401	111513400	2Kb_1224	MDKO_M_335	2000	11.63	24.46	Down	-1.07	1.82e-05	0.000185612	0	0	0	0	0	Genedesert	NA	NA	NA	NA	NA
chr19	7853501	7862000	5Kb_1875	MDKO_M_1042	8500	30.11	102.25	Down	-1.76	1.54e-10	4e-09	BC014805	NM_146232	-	7856472	7877156	Genebody	19405.5	NA	NA	NA	NA
chr11	44235501	44236900	1kb_984	MDKO_M_337	1400	10.92	22.34	Down	-1.03	3.07e-05	0.000390631	0	0	0	0	0	OtherIntergenic	NA	NA	NA	NA	NA
chr11	99024201	99026200	2Kb_1139	MDKO_M_338	2000	12.04	24.44	Down	-1.02	3.87e-05	0.000361337	0	0	0	0	0	OtherIntergenic	NA	NA	NA	NA	NA
chr11	50368201	50370200	2Kb_867	MDKO_M_339	2000	11.6	23.34	Down	-1.01	5.22e-05	0.000470075	0	0	0	0	0	OtherIntergenic	NA	NA	NA	NA	NA
chr11	117344301	117345700	1kb_1449	MDKO_M_340	1400	15.44	30.9	Down	-1	4.21e-05	0.000510635	0	0	0	0	0	OtherIntergenic	NA	NA	NA	NA	NA
chr15	3967001	3987000	10Kb_929	MDKO_M_705	20000	108.89	229.7	Down	-1.08	3.49e-11	1.6e-09	BC037032	NR_028266	-	3970110	3977405	Promoter1k	404.5	NA	NA	NA	NA
chr10	105255001	105268000	10Kb_313	MDKO_M_222	13000	54.1	120.45	Down	-1.15	9.08e-12	1.6e-09	BC067068	NM_207522	-	105200241	105278435	Genebody	16934.5	NA	NA	NA	NA
chr11	85568001	85615000	10Kb_469	MDKO_M_318	47000	287.77	589.09	Down	-1.03	2.15e-10	3.54e-09	Bcas3	NM_001166642	+	85166665	85639558	Genebody	424836	NA	NA	NA	NA
chr3	145583401	145586600	2Kb_4017	MDKO_M_1309	3200	17.18	36.95	Down	-1.1	2.17e-08	4.09e-07	Bcl10	NM_009740	+	145587341	145597246	Promoter3k	-2340.5	NA	NA	NA	NA
chr5	99289501	99290500	1kb_5357	MDKO_M_1582	1000	6.64	16.3	Down	-1.3	7.26e-05	0.00080704	Bmp3	NM_173404	+	99283457	99309978	Genebody	6543.5	NA	NA	NA	NA
chr9	23194401	23195500	1kb_7121	MDKO_M_2138	1100	4.78	15.18	Down	-1.67	9.11e-06	0.000135781	Bmper	NM_028472	+	23027519	23289645	Genebody	167432	NA	NA	NA	NA
chr9	23165001	23166000	1kb_7119	MDKO_M_2139	1000	5.07	15.96	Down	-1.65	3.86e-06	6.37e-05	Bmper	NM_028472	+	23027519	23289645	Genebody	137982	NA	NA	NA	NA
chr9	23095001	23143000	10Kb_2821	MDKO_M_2140	48000	212.49	617.61	Down	-1.54	1.39e-10	2.56e-09	Bmper	NM_028472	+	23027519	23289645	Genebody	91481.5	NA	NA	NA	NA
chr9	23184601	23187600	2Kb_6124	MDKO_M_2141	3000	14.9	39.01	Down	-1.39	7.29e-12	7.24e-10	Bmper	NM_028472	+	23027519	23289645	Genebody	158582	NA	NA	NA	NA
chr9	23170001	23172000	2Kb_6123	MDKO_M_2143	2000	10.31	25.43	Down	-1.3	9.19e-08	1.51e-06	Bmper	NM_028472	+	23027519	23289645	Genebody	143482	NA	NA	NA	NA
chr9	23145501	23151000	5Kb_3811	MDKO_M_2144	5500	25.02	56.18	Down	-1.17	3.85e-08	5.51e-07	Bmper	NM_028472	+	23027519	23289645	Genebody	120732	NA	NA	NA	NA
chr5	32182001	32187000	5Kb_2838	MDKO_M_1583	5000	21.82	65.9	Down	-1.59	2.61e-10	6.13e-09	Bre	NM_144541	+	32000422	32387111	Genebody	184078	NA	NA	NA	NA
chr4	62138601	62140800	2Kb_4187	MDKO_M_1447	2200	13.42	30	Down	-1.16	1.69e-06	2.19e-05	Bspry	NM_138653	+	62141100	62158331	Promoter3k	-1399.5	NA	NA	NA	NA
chr10	85087501	85088500	1kb_731	MDKO_M_226	1000	9.26	19.57	Down	-1.08	5.53e-05	0.000643593	Btbd11	NM_001017525	+	85061155	85123036	Genebody	26845.5	NA	NA	NA	NA
chr19	45533201	45534200	1kb_3627	MDKO_M_1046	1000	5.03	13.35	Down	-1.41	3.9e-05	0.000478771	Btrc	NM_009771	+	45438223	45607832	Genebody	95477.5	NA	NA	NA	NA
chr2	127655201	127658600	2Kb_3505	MDKO_M_1149	3400	18.13	39.62	Down	-1.13	1.43e-06	1.89e-05	Bub1	NM_009772	-	127625935	127657594	Promoter1k	693.5	NA	NA	NA	NA
chr10	75129601	75131600	2Kb_589	MDKO_M_228	2000	6.36	26.61	Down	-2.06	4.57e-12	6.12e-10	Cabin1	NM_172549	-	75108854	75227101	Genebody	96500.5	NA	NA	NA	NA
chr18	12007201	12009600	2Kb_2740	MDKO_M_965	2400	12.67	28.9	Down	-1.19	1.96e-07	3.03e-06	Cables1	NM_001146287	+	11997782	12104135	Genebody	10618.5	NA	NA	NA	NA
chr18	11992001	12010000	10Kb_1258	MDKO_M_966	18000	92.22	194.84	Down	-1.08	2.24e-08	2.31e-07	Cables1	NM_001146287	+	11997782	12104135	Genebody	3218.5	NA	NA	NA	NA
chr14	30998001	31000400	2Kb_1851	MDKO_M_630	2400	12.64	28.56	Down	-1.18	1.2e-06	1.61e-05	Cacna1d	NM_001083616	-	30853124	31166671	Genebody	167470	NA	NA	NA	NA
chr11	97872601	97874600	2Kb_1127	MDKO_M_325	2000	12.76	27.71	Down	-1.12	5.19e-06	6.04e-05	Cacnb1	NM_001159320	-	97866239	97879685	Genebody	6084.5	NA	NA	NA	NA
chr11	107565801	107566800	1kb_1400	MDKO_M_326	1000	6.08	15.56	Down	-1.36	4.57e-05	0.000548514	Cacng1	NM_007582	-	107564531	107577789	Genebody	11488.5	NA	NA	NA	NA
chr14	13222601	13223700	1kb_2126	MDKO_M_632	1100	6.17	16.66	Down	-1.43	1.15e-06	2.19e-05	Cadps	NM_012061	-	13205076	13655592	Genebody	432442	NA	NA	NA	NA
chr14	13539001	13566000	10Kb_834	MDKO_M_633	27000	113.13	300.06	Down	-1.41	7.75e-11	1.82e-09	Cadps	NM_012061	-	13205076	13655592	Genebody	103092	NA	NA	NA	NA
chr4	15807201	15808200	1kb_4683	MDKO_M_1451	1000	8.63	19.32	Down	-1.16	4.88e-05	0.000579525	Calb1	NM_009788	+	15808410	15833855	Promoter1k	-709.5	NA	NA	NA	NA
chr19	47212001	47214000	2Kb_3126	MDKO_M_1051	2000	10.14	24.21	Down	-1.26	6.54e-07	9.2e-06	Calhm2	NM_133746	-	47206721	47212783	ProximalPromoter	-217.5	NA	NA	NA	NA
chr4	150856701	150857800	1kb_5125	MDKO_M_1454	1100	4.84	17.86	Down	-1.88	1.41e-06	2.61e-05	Camta1	NM_001166021	-	150433632	151235865	Genebody	378614	NA	NA	NA	NA
chr6	115723201	115726800	2Kb_5183	MDKO_M_1713	3600	17.77	44.4	Down	-1.32	4.64e-11	2e-09	Cand2	NM_025958	+	115724574	115755572	Promoter1k	426.5	NA	NA	NA	NA
chr1	184449401	184450400	1kb_469	MDKO_M_60	1000	4.29	15.03	Down	-1.81	1.35e-06	2.52e-05	Capn2	NM_009794	-	184397389	184447613	Promoter3k	-2287.5	NA	NA	NA	NA
chr6	148843501	148844500	1kb_6052	MDKO_M_1714	1000	5.12	13.66	Down	-1.41	9.79e-05	0.00102569	Caprin2	NM_181541	-	148791033	148844647	Promoter1k	646.5	NA	NA	NA	NA
chr3	14641001	14642600	1kb_4305	MDKO_M_1317	1600	3.89	19.38	Down	-2.32	3.88e-11	2.68e-09	Car13	NM_024495	+	14641726	14663001	ProximalPromoter	74.5	NA	NA	NA	NA
chr10	78179801	78182000	2Kb_596	MDKO_M_231	2200	11.15	26.47	Down	-1.25	3.6e-07	5.32e-06	Casp14	NM_009809	-	78174741	78180986	ProximalPromoter	85.5	NA	NA	NA	NA
chr19	56468401	56470400	2Kb_3147	MDKO_M_1052	2000	13.57	27.18	Down	-1	8.53e-05	0.000715676	Casp7	NM_007611	+	56471618	56516832	Promoter3k	-2217.5	NA	NA	NA	NA
chr3	142357001	142374000	10Kb_1863	MDKO_M_1319	17000	78.25	172.42	Down	-1.14	3.42e-11	1.6e-09	Ccbl2	NM_173763	+	142364043	142407873	Promoter3k	1457.5	NA	NA	NA	NA
chr8	47020801	47022000	1kb_6762	MDKO_M_2037	1200	7.88	22.41	Down	-1.51	5.77e-07	1.18e-05	Ccdc110	NM_001033246	+	47020002	47029498	Promoter3k	1398.5	NA	NA	NA	NA
chr11	108385001	108395000	10Kb_551	MDKO_M_332	10000	36.75	98.37	Down	-1.42	6.43e-12	1.6e-09	Ccdc46	NM_029606	+	108286579	108721928	Genebody	103422	NA	NA	NA	NA
chr9	110959801	110961000	1kb_7599	MDKO_M_2152	1200	4.51	18.87	Down	-2.07	2.29e-09	8.3e-08	Ccrl2	NM_017466	-	110957338	110959773	Promoter1k	-627.5	NA	NA	NA	NA
chr5	44267501	44268500	1kb_5254	MDKO_M_1592	1000	4.46	13.81	Down	-1.63	1.75e-05	0.000241297	Cd38	NM_007646	+	44260065	44303612	Genebody	7935.5	NA	NA	NA	NA
chr5	44259001	44261800	2Kb_4570	MDKO_M_1593	2800	18.15	36.97	Down	-1.03	2.36e-07	3.58e-06	Cd38	NM_007646	+	44260065	44303612	Promoter1k	335.5	NA	NA	NA	NA
chr2	102740901	102741900	1kb_3972	MDKO_M_1162	1000	7.42	17.68	Down	-1.25	9.57e-05	0.0010096	Cd44	NM_009851	-	102651299	102741821	Promoter1k	420.5	NA	NA	NA	NA
chr16	38474201	38476200	2Kb_2373	MDKO_M_815	2000	9.8	24.88	Down	-1.34	7.32e-07	1.02e-05	Cd80	NM_009855	+	38459012	38487013	Genebody	16188.5	NA	NA	NA	NA
chr8	86261001	86273000	10Kb_2714	MDKO_M_2042	12000	68.36	137.33	Down	-1.01	2.23e-11	1.6e-09	Cd97	NM_001163029	-	86247149	86265209	Promoter3k	-1791.5	NA	NA	NA	NA
chr3	116124801	116126800	2Kb_3941	MDKO_M_1331	2000	7.21	30.74	Down	-2.09	6.47e-10	1.78e-08	Cdc14a	NM_001080818	-	115975471	116126949	Promoter3k	1148.5	NA	NA	NA	NA
chr3	116101001	116123000	10Kb_1835	MDKO_M_1332	22000	100.59	247.42	Down	-1.3	5.3e-11	1.63e-09	Cdc14a	NM_001080818	-	115975471	116126949	Genebody	14948.5	NA	NA	NA	NA
chr11	83552001	83567000	10Kb_462	MDKO_M_385	15000	151.11	47.17	Up	1.68	1.09e-11	1.6e-09	1100001G20Rik	NM_183249	+	83560441	83566147	Promoter1k	-940.5	NA	NA	NA	NA
chr11	102973501	102974500	1kb_1378	MDKO_M_386	1000	15.28	5.24	Up	1.54	1.77e-06	3.19e-05	Acbd4	NM_025988	+	102963001	102973512	Genebody	10999.5	NA	NA	NA	NA
chr11	43586001	43593500	5Kb_509	MDKO_M_387	7500	72.29	31.96	Up	1.18	9.67e-12	1.15e-09	Adra1b	NM_007416	-	43588107	43649833	Genebody	60082.5	NA	NA	NA	NA
chr11	43648201	43651000	2Kb_848	MDKO_M_388	2800	32.38	11.36	Up	1.51	6e-09	1.27e-07	Adra1b	NM_007416	-	43588107	43649833	ProximalPromoter	232.5	NA	NA	NA	NA
chr11	69911201	69913200	2Kb_987	MDKO_M_389	2000	22.57	6.03	Up	1.9	1.17e-09	3e-08	Asgr2	NM_007493	+	69906145	69919687	Genebody	6055.5	NA	NA	NA	NA
chr11	101051001	101067000	10Kb_519	MDKO_M_391	16000	152.07	62.4	Up	1.29	1.34e-11	1.6e-09	Ezh1	NM_007970	-	101052429	101087763	Genebody	28762.5	NA	NA	NA	NA
chr11	115156501	115161500	5Kb_762	MDKO_M_392	5000	55.34	24.92	Up	1.15	8.3e-12	1.15e-09	Fads6	NM_178035	-	115144680	115158859	ProximalPromoter	-141.5	NA	NA	NA	NA
chr11	120384001	120401000	10Kb_583	MDKO_M_394	17000	165.27	46.46	Up	1.83	9.97e-12	1.6e-09	Gcgr	NM_008101	+	120392040	120400297	Promoter1k	460.5	NA	NA	NA	NA
chr11	98304001	98323000	10Kb_513	MDKO_M_395	19000	244.65	116.88	Up	1.07	1.74e-09	2.16e-08	Grb7	NM_010346	+	98308147	98316686	Genebody	5353.5	NA	NA	NA	NA
chr11	90240001	90257000	10Kb_489	MDKO_M_396	17000	185.55	75.5	Up	1.3	3.78e-11	1.6e-09	Hlf	NM_172563	-	90197848	90252230	Genebody	3729.5	NA	NA	NA	NA
chr11	83703201	83705200	2Kb_1046	MDKO_M_397	2000	22.76	10.06	Up	1.18	3.12e-05	0.000299588	Hnf1b	NM_009330	+	83664370	83719316	Genebody	39830.5	NA	NA	NA	NA
chr11	83655001	83677000	10Kb_464	MDKO_M_398	22000	275.18	118.37	Up	1.22	4.61e-10	6.7e-09	Hnf1b	NM_009330	+	83664370	83719316	Promoter3k	1630.5	NA	NA	NA	NA
chr11	83677601	83679600	2Kb_1045	MDKO_M_399	2000	23	7.27	Up	1.66	1.57e-08	3.06e-07	Hnf1b	NM_009330	+	83664370	83719316	Genebody	14230.5	NA	NA	NA	NA
chr11	100053701	100054700	1kb_1345	MDKO_M_400	1000	16.58	7.26	Up	1.19	4.63e-05	0.00055368	Krt9	NM_201255	-	100048094	100054559	Promoter1k	358.5	NA	NA	NA	NA
chr11	79524601	79527000	2Kb_1027	MDKO_M_401	2400	30.11	7.61	Up	1.98	4.24e-13	5e-10	Mir193	NR_029579	+	79525470	79525535	Promoter1k	330.5	NA	NA	NA	NA
chr11	102003001	102014000	10Kb_525	MDKO_M_402	11000	126.95	40.18	Up	1.66	6.74e-10	9.31e-09	Nags	NM_178053	+	102007679	102010789	Promoter1k	821.5	NA	NA	NA	NA
chr11	4772801	4775400	2Kb_760	MDKO_M_403	2600	32.78	7.2	Up	2.19	4.5e-13	5e-10	Nipsnap1	NM_008698	+	4774005	4794202	ProximalPromoter	95.5	NA	NA	NA	NA
chr11	87469001	87486000	10Kb_474	MDKO_M_404	17000	151.13	74.81	Up	1.01	9.64e-08	9.16e-07	Rnf43	NM_172448	+	87476588	87549040	Promoter1k	912.5	NA	NA	NA	NA
chr11	87517001	87531000	10Kb_475	MDKO_M_405	14000	129.97	52.42	Up	1.31	1.3e-11	1.6e-09	Rnf43	NM_172448	+	87476588	87549040	Genebody	47412.5	NA	NA	NA	NA
chr11	87542001	87549000	5Kb_643	MDKO_M_406	7000	75.7	30.61	Up	1.31	1.19e-11	1.17e-09	Rnf43	NM_172448	+	87476588	87549040	Genebody	68912.5	NA	NA	NA	NA
chr11	75047801	75049800	2Kb_1006	MDKO_M_407	2000	24.97	12.41	Up	1.01	2.12e-05	0.000213192	Rtn4rl1	NM_177708	+	75007494	75081263	Genebody	41306.5	NA	NA	NA	NA
chr11	75001001	75016000	10Kb_441	MDKO_M_408	15000	138.41	65.36	Up	1.08	2.62e-10	4.17e-09	Rtn4rl1	NM_177708	+	75007494	75081263	Promoter3k	1006.5	NA	NA	NA	NA
chr11	102248001	102269000	10Kb_526	MDKO_M_409	21000	235.85	117.5	Up	1.01	6.87e-10	9.45e-09	Rundc3a	NM_016759	+	102254748	102263866	Genebody	3752.5	NA	NA	NA	NA
chr11	4002001	4004000	2Kb_757	MDKO_M_410	2000	22.44	6.24	Up	1.85	5.77e-10	1.62e-08	Sec14l2	NM_144520	-	3997042	4018731	Genebody	15730.5	NA	NA	NA	NA
chr11	4009001	4027000	10Kb_337	MDKO_M_411	18000	190.59	51.78	Up	1.88	1.71e-09	2.13e-08	Sec14l2	NM_144520	-	3997042	4018731	Promoter1k	730.5	NA	NA	NA	NA
chr11	53267001	53289000	10Kb_391	MDKO_M_412	22000	293.46	120.56	Up	1.28	1.93e-10	3.28e-09	Shroom1	NM_027917	+	53270706	53281256	Genebody	7294.5	NA	NA	NA	NA
chr11	78226001	78237000	10Kb_451	MDKO_M_413	11000	121.67	52.18	Up	1.22	1.24e-08	1.32e-07	Slc13a2	NM_022411	-	78210777	78235686	Genebody	4185.5	NA	NA	NA	NA
chr11	98451201	98453400	2Kb_1136	MDKO_M_415	2200	25.18	11.09	Up	1.18	6.69e-06	7.61e-05	0	0	0	0	0	OtherIntergenic	NA	NA	NA	NA	NA
chr11	94002001	94017000	10Kb_492	MDKO_M_416	15000	137.3	60.04	Up	1.19	3.95e-10	5.87e-09	0	0	0	0	0	OtherIntergenic	NA	NA	NA	NA	NA
chr11	90278201	90280200	2Kb_1090	MDKO_M_417	2000	30.54	13	Up	1.23	2.34e-05	0.000232973	0	0	0	0	0	OtherIntergenic	NA	NA	NA	NA	NA
chr11	117479001	117480300	1kb_1451	MDKO_M_418	1300	22.34	8.81	Up	1.34	6.67e-07	1.34e-05	0	0	0	0	0	OtherIntergenic	NA	NA	NA	NA	NA
chr11	72756801	72757800	1kb_1171	MDKO_M_419	1000	18.01	6.95	Up	1.37	8.33e-06	0.000125461	0	0	0	0	0	OtherIntergenic	NA	NA	NA	NA	NA
chr11	120360501	120366500	5Kb_787	MDKO_M_420	6000	62.36	23.49	Up	1.41	3.7e-12	1.15e-09	0	0	0	0	0	OtherIntergenic	NA	NA	NA	NA	NA
chr11	31766501	31767500	1kb_949	MDKO_M_421	1000	13.72	4.89	Up	1.49	9.08e-05	0.000963704	0	0	0	0	0	OtherIntergenic	NA	NA	NA	NA	NA
chr11	69886801	69888300	1kb_1158	MDKO_M_422	1500	19.45	6.34	Up	1.62	5.2e-07	1.07e-05	0	0	0	0	0	OtherIntergenic	NA	NA	NA	NA	NA
chr11	102613401	102614400	1kb_1371	MDKO_M_423	1000	13.25	4.04	Up	1.71	7.42e-06	0.000113628	0	0	0	0	0	OtherIntergenic	NA	NA	NA	NA	NA
chr11	53262401	53265800	2Kb_884	MDKO_M_424	3400	36.36	9.58	Up	1.92	7.17e-13	5e-10	0	0	0	0	0	OtherIntergenic	NA	NA	NA	NA	NA
chr5	107390001	107397500	5Kb_2934	MDKO_M_1595	7500	46.09	92.98	Down	-1.01	1.71e-11	1.2e-09	Cdc7	NM_009863	+	107393340	107413449	Promoter1k	410.5	NA	NA	NA	NA
chr12	86827601	86828800	1kb_1701	MDKO_M_426	1200	4.73	20.29	Down	-2.1	1.34e-10	7.45e-09	0	0	0	0	0	OtherIntergenic	NA	NA	NA	NA	NA
chr12	102002301	102003300	1kb_1716	MDKO_M_427	1000	3.53	14.59	Down	-2.05	7.81e-08	1.94e-06	0	0	0	0	0	OtherIntergenic	NA	NA	NA	NA	NA
chr5	4868001	4904000	10Kb_2074	MDKO_M_1598	36000	162.51	408.71	Down	-1.33	9.36e-11	2.01e-09	Cdk14	NM_011074	-	4803384	5380250	Genebody	494250	NA	NA	NA	NA
chr12	104944801	104948200	2Kb_1493	MDKO_M_429	3400	14.74	53	Down	-1.85	4.45e-08	7.84e-07	0	0	0	0	0	OtherIntergenic	NA	NA	NA	NA	NA
chr12	44993001	45028000	10Kb_614	MDKO_M_430	35000	128.89	427.2	Down	-1.73	1.05e-10	2.14e-09	0	0	0	0	0	Genedesert	NA	NA	NA	NA	NA
chr12	14019401	14021400	2Kb_1307	MDKO_M_431	2000	6.74	22.17	Down	-1.72	4.62e-10	1.33e-08	0	0	0	0	0	OtherIntergenic	NA	NA	NA	NA	NA
chr12	104901001	104948000	10Kb_690	MDKO_M_432	47000	186.44	580.18	Down	-1.64	5.49e-09	6.21e-08	0	0	0	0	0	OtherIntergenic	NA	NA	NA	NA	NA
chr12	79098301	79099300	1kb_1663	MDKO_M_433	1000	5.25	15.23	Down	-1.54	3.7e-05	0.000457278	0	0	0	0	0	OtherIntergenic	NA	NA	NA	NA	NA
chr12	10563701	10564700	1kb_1484	MDKO_M_434	1000	4.83	13.81	Down	-1.52	2.19e-05	0.000291327	0	0	0	0	0	OtherIntergenic	NA	NA	NA	NA	NA
chr12	31112201	31113300	1kb_1525	MDKO_M_435	1100	6.95	19.27	Down	-1.47	3.79e-06	6.29e-05	0	0	0	0	0	OtherIntergenic	NA	NA	NA	NA	NA
chr12	13672001	13698000	10Kb_595	MDKO_M_436	26000	111.32	305.58	Down	-1.46	4.55e-10	6.63e-09	0	0	0	0	0	OtherIntergenic	NA	NA	NA	NA	NA
chr12	31878801	31880100	1kb_1526	MDKO_M_437	1300	6.16	16.65	Down	-1.43	8.44e-06	0.000126977	0	0	0	0	0	OtherIntergenic	NA	NA	NA	NA	NA
chr5	4867001	4870600	2Kb_4490	MDKO_M_1599	3600	17.01	42.12	Down	-1.31	2.22e-11	1.25e-09	Cdk14	NM_011074	-	4803384	5380250	Genebody	511450	NA	NA	NA	NA
chr12	86797301	86798400	1kb_1699	MDKO_M_439	1100	5.86	15.46	Down	-1.4	1.17e-05	0.000169124	0	0	0	0	0	OtherIntergenic	NA	NA	NA	NA	NA
chr12	57564901	57565900	1kb_1612	MDKO_M_440	1000	5.62	14.47	Down	-1.36	8.47e-05	0.0009129	0	0	0	0	0	OtherIntergenic	NA	NA	NA	NA	NA
chr12	86720401	86722400	2Kb_1465	MDKO_M_441	2000	9.46	23.52	Down	-1.31	6.04e-07	8.55e-06	0	0	0	0	0	OtherIntergenic	NA	NA	NA	NA	NA
chr12	13848501	13853500	5Kb_814	MDKO_M_442	5000	22.24	54.66	Down	-1.3	3.12e-12	1.15e-09	0	0	0	0	0	OtherIntergenic	NA	NA	NA	NA	NA
chr12	110003001	110006400	2Kb_1501	MDKO_M_443	3400	17.47	42.53	Down	-1.28	8.09e-10	2.17e-08	0	0	0	0	0	OtherIntergenic	NA	NA	NA	NA	NA
chr12	55480201	55483400	2Kb_1367	MDKO_M_444	3200	13.91	33.73	Down	-1.28	2.1e-09	4.99e-08	0	0	0	0	0	OtherIntergenic	NA	NA	NA	NA	NA
chr12	96106801	96108800	2Kb_1477	MDKO_M_445	2000	10.09	24.48	Down	-1.28	2.57e-07	3.87e-06	0	0	0	0	0	Genedesert	NA	NA	NA	NA	NA
chr12	79032001	79066000	10Kb_655	MDKO_M_446	34000	171.29	406.92	Down	-1.25	1.62e-10	2.86e-09	0	0	0	0	0	OtherIntergenic	NA	NA	NA	NA	NA
chr12	55471001	55483000	10Kb_619	MDKO_M_447	12000	54.78	129.07	Down	-1.24	1.84e-11	1.6e-09	0	0	0	0	0	OtherIntergenic	NA	NA	NA	NA	NA
chr12	55562401	55564400	2Kb_1372	MDKO_M_448	2000	9.71	22.9	Down	-1.24	1.32e-06	1.75e-05	0	0	0	0	0	OtherIntergenic	NA	NA	NA	NA	NA
chr12	103274001	103281500	5Kb_927	MDKO_M_449	7500	35.45	82.63	Down	-1.22	4.87e-12	1.15e-09	0	0	0	0	0	OtherIntergenic	NA	NA	NA	NA	NA
chr12	13639601	13642600	2Kb_1304	MDKO_M_450	3000	17.55	41.01	Down	-1.22	2.19e-05	0.000219722	0	0	0	0	0	OtherIntergenic	NA	NA	NA	NA	NA
chr12	70545001	70556000	10Kb_632	MDKO_M_451	11000	47.92	107.63	Down	-1.17	1.89e-11	1.6e-09	0	0	0	0	0	OtherIntergenic	NA	NA	NA	NA	NA
chr12	25417001	25422500	5Kb_818	MDKO_M_452	5500	29.05	64.94	Down	-1.16	1.35e-11	1.17e-09	0	0	0	0	0	OtherIntergenic	NA	NA	NA	NA	NA
chr12	37785701	37786800	1kb_1568	MDKO_M_453	1100	7.38	16.39	Down	-1.15	7.26e-05	0.00080704	0	0	0	0	0	OtherIntergenic	NA	NA	NA	NA	NA
chr12	37670001	37678000	5Kb_836	MDKO_M_454	8000	39.71	87.56	Down	-1.14	1.78e-09	3.31e-08	0	0	0	0	0	OtherIntergenic	NA	NA	NA	NA	NA
chr12	55485401	55487400	2Kb_1368	MDKO_M_455	2000	11.65	25.54	Down	-1.13	5.27e-05	0.000474498	0	0	0	0	0	OtherIntergenic	NA	NA	NA	NA	NA
chr12	10566001	10609000	10Kb_590	MDKO_M_456	43000	260.22	567.26	Down	-1.12	1.08e-10	2.17e-09	0	0	0	0	0	OtherIntergenic	NA	NA	NA	NA	NA
chr12	111613301	111614600	1kb_1743	MDKO_M_457	1300	14.35	30.73	Down	-1.1	9.55e-06	0.000141456	0	0	0	0	0	OtherIntergenic	NA	NA	NA	NA	NA
chr12	57495001	57550000	10Kb_624	MDKO_M_458	55000	370.9	766.82	Down	-1.05	2.15e-10	3.55e-09	0	0	0	0	0	OtherIntergenic	NA	NA	NA	NA	NA
chr12	13611001	13650000	10Kb_594	MDKO_M_459	39000	198.53	411.73	Down	-1.05	5.85e-10	8.21e-09	0	0	0	0	0	OtherIntergenic	NA	NA	NA	NA	NA
chr12	78783201	78785600	2Kb_1425	MDKO_M_460	2400	15.12	31.38	Down	-1.05	3.12e-06	3.83e-05	0	0	0	0	0	OtherIntergenic	NA	NA	NA	NA	NA
chr12	11202001	11204200	2Kb_1298	MDKO_M_461	2200	14.08	28.88	Down	-1.04	4.43e-05	0.000406319	0	0	0	0	0	OtherIntergenic	NA	NA	NA	NA	NA
chr12	79091001	79096500	5Kb_890	MDKO_M_462	5500	28.33	56.87	Down	-1.01	6.82e-10	1.4e-08	0	0	0	0	0	OtherIntergenic	NA	NA	NA	NA	NA
chr12	74512201	74514200	2Kb_1410	MDKO_M_463	2000	12.1	24.13	Down	-1	6.82e-05	0.000589399	0	0	0	0	0	OtherIntergenic	NA	NA	NA	NA	NA
chr12	31810601	31812600	2Kb_1326	MDKO_M_464	2000	11.32	22.63	Down	-1	3e-05	0.00028928	0	0	0	0	0	OtherIntergenic	NA	NA	NA	NA	NA
chr5	4979001	4981200	2Kb_4495	MDKO_M_1600	2200	11.56	23.57	Down	-1.03	2.22e-05	0.000221958	Cdk14	NM_011074	-	4803384	5380250	Genebody	400150	NA	NA	NA	NA
chr11	80291001	80293000	2Kb_1031	MDKO_M_336	2000	16.35	33.64	Down	-1.04	1.46e-05	0.000153423	Cdk5r1	NM_009871	+	80290547	80294680	Promoter3k	1453.5	NA	NA	NA	NA
chr14	47380601	47381900	1kb_2187	MDKO_M_639	1300	8.21	23.93	Down	-1.54	5.46e-07	1.12e-05	Cdkn3	NM_028222	+	47380215	47391198	Promoter3k	1035.5	NA	NA	NA	NA
chr7	20561401	20563400	2Kb_5298	MDKO_M_1792	2000	12.71	25.83	Down	-1.02	1.04e-05	0.000113184	Ceacam20	NM_027839	+	20550760	20576459	Genebody	11640.5	NA	NA	NA	NA
chr19	38129701	38131100	1kb_3579	MDKO_M_1056	1400	6.06	19.68	Down	-1.7	3.22e-08	8.65e-07	Cep55	NM_001164362	+	38129531	38148914	Promoter1k	869.5	NA	NA	NA	NA
chr15	86010001	86020500	5Kb_1385	MDKO_M_719	10500	27.17	148.07	Down	-2.45	1.76e-11	1.2e-09	Cerk	NM_145475	-	85969532	86016570	Promoter3k	1319.5	NA	NA	NA	NA
chr15	85989801	85991100	1kb_2587	MDKO_M_720	1300	3.98	20.67	Down	-2.38	1.67e-11	1.38e-09	Cerk	NM_145475	-	85969532	86016570	Genebody	26119.5	NA	NA	NA	NA
chr15	85999501	86008500	5Kb_1384	MDKO_M_721	9000	31.97	94.76	Down	-1.57	3.64e-12	1.15e-09	Cerk	NM_145475	-	85969532	86016570	Genebody	12569.5	NA	NA	NA	NA
chr3	37210001	37211100	1kb_4332	MDKO_M_1333	1100	5.48	17.28	Down	-1.66	9.28e-06	0.00013794	Cetn4	NM_145825	-	37207548	37211367	Promoter1k	816.5	NA	NA	NA	NA
chr4	34827001	34853000	10Kb_1896	MDKO_M_1465	26000	140.37	287.44	Down	-1.03	6.19e-11	1.68e-09	Cga	NM_009889	+	34841027	34854622	Promoter3k	-1026.5	NA	NA	NA	NA
chr7	139468001	139490000	10Kb_2591	MDKO_M_1884	22000	103.61	229.81	Down	-1.15	5.79e-11	1.65e-09	Chst15	NM_029935	-	139427937	139508837	Genebody	29836.5	NA	NA	NA	NA
chr9	54405801	54407800	2Kb_6278	MDKO_M_2154	2000	15.19	30.37	Down	-1	3.39e-05	0.000322664	Cib2	NM_019686	-	54393158	54407885	Promoter3k	1084.5	NA	NA	NA	NA
chr9	65114001	65115000	1kb_7396	MDKO_M_2155	1000	4.05	13.44	Down	-1.73	1.67e-05	0.000230932	Cilp	NM_173385	+	65112986	65128411	Promoter3k	1514.5	NA	NA	NA	NA
chr5	116426001	116431000	5Kb_2960	MDKO_M_1606	5000	20.65	51.72	Down	-1.32	1.23e-10	3.33e-09	Cit	NM_007708	+	116295664	116456349	Genebody	132836	NA	NA	NA	NA
chr5	135026201	135028200	2Kb_4847	MDKO_M_1608	2000	8.41	30.51	Down	-1.86	1.39e-09	3.48e-08	Clip2	NM_009990	-	134965255	135028303	Promoter3k	1102.5	NA	NA	NA	NA
chr9	97930601	97931600	1kb_7552	MDKO_M_2158	1000	5.57	14.67	Down	-1.4	2.77e-05	0.00035626	Clstn2	NM_022319	-	97344813	97933585	Promoter3k	2484.5	NA	NA	NA	NA
chr8	106858001	106873000	10Kb_2764	MDKO_M_2045	15000	63.29	153.43	Down	-1.28	1.48e-09	1.88e-08	Cmtm3	NM_024217	+	106864493	106871571	Promoter3k	1007.5	NA	NA	NA	NA
chr9	114682001	114698000	10Kb_2981	MDKO_M_2159	16000	64.16	171.55	Down	-1.42	1.01e-11	1.6e-09	Cmtm7	NM_133978	-	114665953	114690946	Promoter1k	945.5	NA	NA	NA	NA
chr12	77422501	77429500	5Kb_882	MDKO_M_483	7000	65.97	28.57	Up	1.21	3.63e-12	1.15e-09	Akap5	NM_001101471	+	77425877	77435137	ProximalPromoter	123.5	NA	NA	NA	NA
chr12	113958001	113965000	5Kb_949	MDKO_M_484	7000	85	24.05	Up	1.82	1.62e-11	1.19e-09	AW555464	NM_001024602	+	113960384	113984801	Promoter3k	1116.5	NA	NA	NA	NA
chr12	25363001	25371500	5Kb_817	MDKO_M_485	8500	103.62	29.53	Up	1.81	7e-11	2.21e-09	Cys1	NM_138686	-	25350702	25366659	Promoter1k	-591.5	NA	NA	NA	NA
chr12	55303601	55305600	2Kb_1366	MDKO_M_486	2000	26.89	11.45	Up	1.23	3.56e-05	0.000336408	Egln3	NM_028133	-	55279968	55304860	Promoter1k	259.5	NA	NA	NA	NA
chr12	55296701	55297900	1kb_1585	MDKO_M_487	1200	13.72	5.08	Up	1.43	6.9e-05	0.000774478	Egln3	NM_028133	-	55279968	55304860	Genebody	7559.5	NA	NA	NA	NA
chr12	86630601	86631900	1kb_1697	MDKO_M_488	1300	24.14	7.46	Up	1.69	1.54e-07	3.58e-06	Fam164c	NM_172414	+	86629540	86640307	Promoter3k	1710.5	NA	NA	NA	NA
chr12	58627001	58658000	10Kb_629	MDKO_M_489	31000	470.72	203.86	Up	1.21	1.59e-09	2e-08	Foxa1	NM_008259	-	58641618	58647107	Genebody	4606.5	NA	NA	NA	NA
chr12	113825701	113826800	1kb_1749	MDKO_M_490	1100	13.6	3.21	Up	2.08	9.08e-08	2.22e-06	Inf2	NM_198411	+	113826994	113853767	Promoter1k	-743.5	NA	NA	NA	NA
chr12	87086801	87088800	2Kb_1470	MDKO_M_491	2000	25.33	9.11	Up	1.47	5.52e-06	6.4e-05	Mfsd7c	NM_145447	+	87087488	87154534	Promoter1k	312.5	NA	NA	NA	NA
chr12	104770001	104772600	2Kb_1489	MDKO_M_492	2600	37.76	16.6	Up	1.19	7.4e-07	1.03e-05	Ppp4r4	NM_028980	+	104770774	104852041	Promoter1k	526.5	NA	NA	NA	NA
chr12	82121001	82135000	10Kb_661	MDKO_M_494	14000	141.57	61.09	Up	1.21	2.17e-11	1.6e-09	Smoc1	NM_022316	+	82127794	82287399	ProximalPromoter	206.5	NA	NA	NA	NA
chr12	46166001	46181000	10Kb_615	MDKO_M_495	15000	148.77	70.66	Up	1.07	2.02e-11	1.6e-09	Stxbp6	NM_144552	-	45953472	46175469	Promoter3k	1968.5	NA	NA	NA	NA
chr12	26904401	26906600	2Kb_1321	MDKO_M_496	2200	25.77	12.59	Up	1.03	4.58e-05	0.000419113	0	0	0	0	0	Genedesert	NA	NA	NA	NA	NA
chr12	81853401	81854400	1kb_1669	MDKO_M_497	1000	14.97	6.09	Up	1.3	5.36e-05	0.000629115	0	0	0	0	0	OtherIntergenic	NA	NA	NA	NA	NA
chr12	74637001	74657000	10Kb_646	MDKO_M_498	20000	257.3	81.98	Up	1.65	1.81e-10	3.13e-09	Tmem30b	NM_178715	-	74644100	74647381	Promoter1k	380.5	NA	NA	NA	NA
chr12	112682001	112687500	5Kb_943	MDKO_M_499	5500	58.35	28.67	Up	1.03	1.35e-07	1.76e-06	Tnfaip2	NM_009396	+	112680871	112693228	Genebody	3879.5	NA	NA	NA	NA
chr12	83231101	83232200	1kb_1673	MDKO_M_500	1100	14.91	4.94	Up	1.59	1.36e-05	0.000192864	0	0	0	0	0	OtherIntergenic	NA	NA	NA	NA	NA
chr12	110213001	110243000	10Kb_695	MDKO_M_501	30000	334.05	158.78	Up	1.07	4.86e-10	7e-09	Wdr25	NM_177602	+	110132481	110266659	Genebody	95519.5	NA	NA	NA	NA
chr13	45100501	45101500	1kb_1898	MDKO_M_502	1000	2.54	12.56	Down	-2.3	3.45e-07	7.44e-06	0	0	0	0	0	OtherIntergenic	NA	NA	NA	NA	NA
chr13	89792801	89793800	1kb_2023	MDKO_M_503	1000	4.13	13.72	Down	-1.73	6.26e-06	9.77e-05	0	0	0	0	0	OtherIntergenic	NA	NA	NA	NA	NA
chr13	111756701	111757900	1kb_2089	MDKO_M_504	1200	4.88	15.48	Down	-1.67	7.47e-06	0.000114181	0	0	0	0	0	OtherIntergenic	NA	NA	NA	NA	NA
chr13	113229601	113230600	1kb_2096	MDKO_M_505	1000	5.13	14.77	Down	-1.53	4.73e-06	7.61e-05	0	0	0	0	0	OtherIntergenic	NA	NA	NA	NA	NA
chr13	93297001	93319000	10Kb_803	MDKO_M_506	22000	88.91	251.04	Down	-1.5	4.02e-11	1.6e-09	0	0	0	0	0	OtherIntergenic	NA	NA	NA	NA	NA
chr13	94806001	94808400	2Kb_1765	MDKO_M_507	2400	12.5	35.07	Down	-1.49	2.68e-09	6.15e-08	0	0	0	0	0	OtherIntergenic	NA	NA	NA	NA	NA
chr13	29241401	29242500	1kb_1817	MDKO_M_508	1100	5.94	16.06	Down	-1.43	1.4e-05	0.000197859	0	0	0	0	0	OtherIntergenic	NA	NA	NA	NA	NA
chr13	118280501	118281700	1kb_2105	MDKO_M_509	1200	6.13	16.4	Down	-1.42	1.99e-06	3.55e-05	0	0	0	0	0	OtherIntergenic	NA	NA	NA	NA	NA
chr13	28724001	28726000	2Kb_1564	MDKO_M_510	2000	9.88	26.24	Down	-1.41	5e-08	8.7e-07	0	0	0	0	0	OtherIntergenic	NA	NA	NA	NA	NA
chr13	28871601	28872600	1kb_1810	MDKO_M_511	1000	5.59	14.83	Down	-1.41	8.79e-05	0.000939663	0	0	0	0	0	OtherIntergenic	NA	NA	NA	NA	NA
chr13	44746601	44747700	1kb_1896	MDKO_M_512	1100	5.54	14.68	Down	-1.41	1.79e-05	0.000245629	0	0	0	0	0	OtherIntergenic	NA	NA	NA	NA	NA
chr13	5584401	5586400	2Kb_1535	MDKO_M_513	2000	10.83	28.49	Down	-1.4	2.73e-07	4.1e-06	0	0	0	0	0	Genedesert	NA	NA	NA	NA	NA
chr13	32751601	32753600	2Kb_1589	MDKO_M_514	2000	8.69	23.01	Down	-1.4	1.29e-07	2.07e-06	0	0	0	0	0	OtherIntergenic	NA	NA	NA	NA	NA
chr13	28624801	28627200	2Kb_1563	MDKO_M_515	2400	11.44	29.64	Down	-1.37	5.57e-10	1.57e-08	0	0	0	0	0	OtherIntergenic	NA	NA	NA	NA	NA
chr13	69596801	69597800	1kb_2003	MDKO_M_516	1000	5.79	14.82	Down	-1.36	2.77e-05	0.00035626	0	0	0	0	0	OtherIntergenic	NA	NA	NA	NA	NA
chr13	42562801	42563800	1kb_1879	MDKO_M_517	1000	6.09	15.48	Down	-1.35	3.42e-05	0.000427717	0	0	0	0	0	OtherIntergenic	NA	NA	NA	NA	NA
chr13	29148601	29150600	2Kb_1577	MDKO_M_518	2000	10.34	26.22	Down	-1.34	1.79e-07	2.79e-06	0	0	0	0	0	OtherIntergenic	NA	NA	NA	NA	NA
chr13	15894001	15896000	2Kb_1541	MDKO_M_519	2000	10.66	26.8	Down	-1.33	1.91e-06	2.45e-05	0	0	0	0	0	OtherIntergenic	NA	NA	NA	NA	NA
chr13	103455401	103456400	1kb_2076	MDKO_M_520	1000	5.85	14.68	Down	-1.33	2.77e-05	0.00035626	0	0	0	0	0	OtherIntergenic	NA	NA	NA	NA	NA
chr13	28605001	28628000	10Kb_723	MDKO_M_521	23000	99.46	247.09	Down	-1.31	4.96e-11	1.61e-09	0	0	0	0	0	OtherIntergenic	NA	NA	NA	NA	NA
chr13	57412101	57413200	1kb_1985	MDKO_M_522	1100	6.9	17.1	Down	-1.31	1.85e-05	0.000251421	0	0	0	0	0	OtherIntergenic	NA	NA	NA	NA	NA
chr13	6047001	6071000	10Kb_709	MDKO_M_523	24000	97.69	240.14	Down	-1.3	2.87e-11	1.6e-09	0	0	0	0	0	OtherIntergenic	NA	NA	NA	NA	NA
chr13	5589701	5590700	1kb_1771	MDKO_M_524	1000	5.86	14.37	Down	-1.3	7.52e-05	0.000829996	0	0	0	0	0	Genedesert	NA	NA	NA	NA	NA
chr13	35538001	35574000	10Kb_740	MDKO_M_525	36000	187.11	454.16	Down	-1.28	1.5e-10	2.71e-09	0	0	0	0	0	OtherIntergenic	NA	NA	NA	NA	NA
chr10	79448001	79456500	5Kb_363	MDKO_M_245	8500	26.62	94.2	Down	-1.82	3.05e-11	1.39e-09	Cnn2	NM_007725	+	79451344	79458144	Promoter1k	906.5	NA	NA	NA	NA
chr13	24014001	24019000	5Kb_969	MDKO_M_527	5000	25.49	56.88	Down	-1.16	3.16e-09	5.58e-08	0	0	0	0	0	OtherIntergenic	NA	NA	NA	NA	NA
chr13	31317001	31319200	2Kb_1582	MDKO_M_528	2200	14.48	31.93	Down	-1.14	2.28e-06	2.88e-05	0	0	0	0	0	OtherIntergenic	NA	NA	NA	NA	NA
chr13	35525801	35527800	2Kb_1598	MDKO_M_529	2000	11.52	25.15	Down	-1.13	1.41e-06	1.87e-05	0	0	0	0	0	OtherIntergenic	NA	NA	NA	NA	NA
chr13	22007901	22009000	1kb_1785	MDKO_M_530	1100	11.46	25	Down	-1.13	1.45e-05	0.000204561	0	0	0	0	0	OtherIntergenic	NA	NA	NA	NA	NA
chr13	109275501	109280500	5Kb_1123	MDKO_M_531	5000	24.96	53.71	Down	-1.11	3.09e-08	4.5e-07	0	0	0	0	0	OtherIntergenic	NA	NA	NA	NA	NA
chr13	31493201	31495600	2Kb_1586	MDKO_M_532	2400	14.16	30.61	Down	-1.11	2.19e-06	2.77e-05	0	0	0	0	0	OtherIntergenic	NA	NA	NA	NA	NA
chr13	31312201	31314200	2Kb_1581	MDKO_M_533	2000	10.66	23.02	Down	-1.11	2e-05	0.00020198	0	0	0	0	0	OtherIntergenic	NA	NA	NA	NA	NA
chr13	41941001	41989000	10Kb_749	MDKO_M_534	48000	240.84	517.77	Down	-1.1	1.57e-10	2.8e-09	0	0	0	0	0	OtherIntergenic	NA	NA	NA	NA	NA
chr13	28736001	28766000	10Kb_724	MDKO_M_535	30000	160.28	344.33	Down	-1.1	6.67e-11	1.72e-09	0	0	0	0	0	OtherIntergenic	NA	NA	NA	NA	NA
chr13	94363001	94384000	10Kb_806	MDKO_M_536	21000	110.78	238.28	Down	-1.1	6.57e-11	1.72e-09	0	0	0	0	0	OtherIntergenic	NA	NA	NA	NA	NA
chr13	99265801	99267800	2Kb_1779	MDKO_M_537	2000	14.11	29.55	Down	-1.07	1.25e-05	0.000133197	0	0	0	0	0	OtherIntergenic	NA	NA	NA	NA	NA
chr13	28769001	28793000	10Kb_725	MDKO_M_538	24000	125.65	262.3	Down	-1.06	6.27e-11	1.68e-09	0	0	0	0	0	OtherIntergenic	NA	NA	NA	NA	NA
chr13	58644601	58647200	2Kb_1720	MDKO_M_539	2600	18.66	38.9	Down	-1.06	7.48e-06	8.42e-05	0	0	0	0	0	OtherIntergenic	NA	NA	NA	NA	NA
chr13	44323001	44325600	2Kb_1637	MDKO_M_540	2600	14.26	29.76	Down	-1.06	7.61e-07	1.06e-05	0	0	0	0	0	OtherIntergenic	NA	NA	NA	NA	NA
chr13	63784001	63802000	10Kb_792	MDKO_M_541	18000	92.9	190.73	Down	-1.04	8.25e-11	1.88e-09	0	0	0	0	0	OtherIntergenic	NA	NA	NA	NA	NA
chr13	28762401	28764400	2Kb_1567	MDKO_M_542	2000	12.93	26.51	Down	-1.04	4.21e-06	5.01e-05	0	0	0	0	0	OtherIntergenic	NA	NA	NA	NA	NA
chr13	29290001	29309000	10Kb_728	MDKO_M_543	19000	102.94	210.54	Down	-1.03	5.47e-11	1.63e-09	0	0	0	0	0	OtherIntergenic	NA	NA	NA	NA	NA
chr13	55948701	55949700	1kb_1979	MDKO_M_544	1000	15.42	31.51	Down	-1.03	6.3e-05	0.000718166	0	0	0	0	0	OtherIntergenic	NA	NA	NA	NA	NA
chr13	29018001	29020400	2Kb_1573	MDKO_M_545	2400	15.26	31	Down	-1.02	2.53e-06	3.17e-05	0	0	0	0	0	OtherIntergenic	NA	NA	NA	NA	NA
chr13	29138201	29140400	2Kb_1576	MDKO_M_546	2200	14.6	29.56	Down	-1.02	9.32e-06	0.000102493	0	0	0	0	0	OtherIntergenic	NA	NA	NA	NA	NA
chr13	28830601	28832600	2Kb_1570	MDKO_M_547	2000	12.29	24.9	Down	-1.02	2.66e-05	0.000259738	0	0	0	0	0	OtherIntergenic	NA	NA	NA	NA	NA
chr13	43963201	43965200	2Kb_1636	MDKO_M_548	2000	12.07	24.42	Down	-1.02	1.38e-05	0.0001458	0	0	0	0	0	OtherIntergenic	NA	NA	NA	NA	NA
chr13	53105601	53108200	2Kb_1691	MDKO_M_549	2600	17.6	35.34	Down	-1.01	4.96e-06	5.81e-05	0	0	0	0	0	OtherIntergenic	NA	NA	NA	NA	NA
chr13	112075001	112099000	10Kb_825	MDKO_M_550	24000	134.35	268.73	Down	-1	6.43e-11	1.71e-09	0	0	0	0	0	OtherIntergenic	NA	NA	NA	NA	NA
chr13	42621401	42623600	2Kb_1623	MDKO_M_551	2200	15.8	31.62	Down	-1	2.85e-05	0.000275601	0	0	0	0	0	OtherIntergenic	NA	NA	NA	NA	NA
chr8	115304801	115306000	1kb_7031	MDKO_M_2046	1200	6.75	16.07	Down	-1.25	5.96e-05	0.000687771	Cntnap4	NM_130457	+	115093942	115406606	Genebody	211458	NA	NA	NA	NA
chr15	55138101	55139600	1kb_2451	MDKO_M_725	1500	21.12	46.69	Down	-1.14	0.000131696	0.00136855	Col14a1	NM_181277	+	55139304	55352356	Promoter1k	-453.5	NA	NA	NA	NA
chr3	130036801	130039000	2Kb_3975	MDKO_M_1339	2200	9.94	24.49	Down	-1.3	8.28e-08	1.38e-06	Col25a1	NM_029838	+	129883795	130298049	Genebody	154106	NA	NA	NA	NA
chr8	122359001	122364000	5Kb_3754	MDKO_M_2047	5000	13.44	64.77	Down	-2.27	7.28e-13	1.15e-09	Cotl1	NM_028071	-	122333113	122364478	Promoter3k	2977.5	NA	NA	NA	NA
chr1	10304001	10330000	10Kb_5	MDKO_M_83	26000	135.28	305.71	Down	-1.18	6.76e-11	1.74e-09	Cpa6	NM_177834	-	10314807	10710023	Genebody	393022	NA	NA	NA	NA
chr8	97055401	97058000	2Kb_5991	MDKO_M_2048	2600	15.62	31.24	Down	-1	1.56e-05	0.000162095	Cpne2	NM_153507	+	97056927	97094428	ProximalPromoter	-226.5	NA	NA	NA	NA
chr12	114388401	114393400	2Kb_1518	MDKO_M_465	5000	24.67	86.1	Down	-1.8	6.71e-12	7.07e-10	Crip1	NM_007763	+	114390222	114392089	Promoter1k	678.5	NA	NA	NA	NA
chr14	57902001	57903000	1kb_2208	MDKO_M_645	1000	4.2	14.06	Down	-1.74	6.17e-07	1.26e-05	Cryl1	NM_030004	-	57893870	58017319	Genebody	114818	NA	NA	NA	NA
chr14	58019001	58021000	2Kb_1902	MDKO_M_646	2000	11.52	24.17	Down	-1.07	1.24e-05	0.000132434	Cryl1	NM_030004	-	57893870	58017319	Promoter3k	-2681.5	NA	NA	NA	NA
chr14	57984001	58003000	10Kb_870	MDKO_M_647	19000	94.74	193.13	Down	-1.03	2.72e-11	1.6e-09	Cryl1	NM_030004	-	57893870	58017319	Genebody	23818.5	NA	NA	NA	NA
chr6	131313001	131345000	10Kb_2424	MDKO_M_1724	32000	152.88	384.23	Down	-1.33	1.09e-10	2.19e-09	Csda	NM_011733	-	131314875	131338467	Genebody	9466.5	NA	NA	NA	NA
chr2	30448801	30451000	2Kb_3254	MDKO_M_1171	2200	12.27	27.94	Down	-1.19	4.51e-07	6.54e-06	Cstad	NM_030137	+	30450563	30464464	Promoter1k	-662.5	NA	NA	NA	NA
chr7	140200001	140210000	10Kb_2595	MDKO_M_1886	10000	51.1	107.82	Down	-1.08	4.38e-08	4.34e-07	Ctbp2	NM_001170744	-	140178693	140206929	Promoter3k	1928.5	NA	NA	NA	NA
chr7	140239201	140241400	2Kb_5626	MDKO_M_1887	2200	12.63	25.21	Down	-1	3.38e-05	0.000322196	Ctbp2	NM_009980	-	140178693	140315165	Genebody	74864.5	NA	NA	NA	NA
chr6	77926101	77927100	1kb_5866	MDKO_M_1725	1000	6.05	14.71	Down	-1.28	6.06e-05	0.000696398	Ctnna2	NM_001109764	-	76831630	77929660	Genebody	3059.5	NA	NA	NA	NA
chr3	104834201	104839800	2Kb_3925	MDKO_M_1340	5600	25.24	83.2	Down	-1.72	3.26e-12	5.51e-10	Cttnbp2nl	NM_001163333	-	104804834	104855870	Genebody	18869.5	NA	NA	NA	NA
chr2	7169001	7179000	10Kb_1464	MDKO_M_1172	10000	43.7	107.88	Down	-1.3	2.57e-09	3.09e-08	Cugbp2	NM_001110232	-	6460743	7317626	Genebody	143626	NA	NA	NA	NA
chr2	7176001	7178000	2Kb_3198	MDKO_M_1173	2000	11.49	24.73	Down	-1.11	1.54e-05	0.000159854	Cugbp2	NM_001110232	-	6460743	7317626	Genebody	140626	NA	NA	NA	NA
chr5	122434001	122518000	10Kb_2228	MDKO_M_1609	84000	603.58	1304.26	Down	-1.11	4.11e-10	6.07e-09	Cux2	NM_007804	-	122310224	122497833	Genebody	21832.5	NA	NA	NA	NA
chr8	124953401	124955800	2Kb_6057	MDKO_M_2049	2400	9.51	29.4	Down	-1.63	1.64e-10	5.46e-09	Cyba	NM_007806	-	124948670	124956839	Promoter3k	2238.5	NA	NA	NA	NA
chr7	26686001	26703000	10Kb_2460	MDKO_M_1797	17000	74.38	196.12	Down	-1.4	1.35e-10	2.51e-09	Cyp2b10	NM_009999	+	26682682	26711642	Genebody	11818.5	NA	NA	NA	NA
chr7	26705201	26707200	2Kb_5308	MDKO_M_1798	2000	8.05	24.66	Down	-1.62	2.74e-09	6.25e-08	Cyp2b10	NM_009999	+	26682682	26711642	Genebody	23518.5	NA	NA	NA	NA
chr7	26708401	26709800	1kb_6105	MDKO_M_1799	1400	7.19	20.28	Down	-1.5	1.31e-06	2.45e-05	Cyp2b10	NM_009999	+	26682682	26711642	Genebody	26418.5	NA	NA	NA	NA
chr7	26878201	26881200	2Kb_5312	MDKO_M_1804	3000	8.16	33.68	Down	-2.05	8.61e-13	5e-10	Cyp2b13	NM_007813	+	26846513	26881214	Genebody	33187.5	NA	NA	NA	NA
chr7	27547001	27565000	10Kb_2464	MDKO_M_1814	18000	58.25	173.92	Down	-1.58	2.26e-11	1.6e-09	Cyp2b19	NM_007814	+	27542205	27557648	Genebody	13795.5	NA	NA	NA	NA
chr13	56539501	56544500	5Kb_1064	MDKO_M_578	5000	57.42	17.11	Up	1.75	2.01e-12	1.15e-09	AU042651	NM_177809	+	56539715	56573723	Promoter3k	2285.5	NA	NA	NA	NA
chr13	56558801	56560000	1kb_1983	MDKO_M_579	1200	15.94	4.32	Up	1.88	3.67e-06	6.1e-05	AU042651	NM_177809	+	56539715	56573723	Genebody	19685.5	NA	NA	NA	NA
chr13	94440501	94445500	5Kb_1099	MDKO_M_580	5000	55.26	15.6	Up	1.82	6.38e-10	1.32e-08	Bhmt2	NM_022884	-	94426051	94444256	Promoter3k	1255.5	NA	NA	NA	NA
chr13	38231001	38254000	10Kb_744	MDKO_M_581	23000	281.07	140.17	Up	1	4.66e-11	1.6e-09	Dsp	NM_023842	+	38243162	38290445	Promoter1k	-661.5	NA	NA	NA	NA
chr13	41279001	41307000	10Kb_748	MDKO_M_582	28000	271.74	82.55	Up	1.72	5.15e-11	1.63e-09	Elovl2	NM_019423	-	41277750	41315771	Genebody	22770.5	NA	NA	NA	NA
chr13	41313501	41314800	1kb_1866	MDKO_M_583	1300	17.19	3.16	Up	2.45	1.52e-09	5.83e-08	Elovl2	NM_019423	-	41277750	41315771	Promoter3k	1620.5	NA	NA	NA	NA
chr13	62985001	62992500	5Kb_1072	MDKO_M_584	7500	70.4	22.54	Up	1.64	3.09e-12	1.15e-09	Fbp1	NM_019395	-	62966112	62989595	Promoter1k	844.5	NA	NA	NA	NA
chr13	55250001	55259000	5Kb_1057	MDKO_M_585	9000	101.39	39.14	Up	1.37	1.05e-09	2.05e-08	Fgfr4	NM_008011	+	55254178	55270119	Promoter1k	322.5	NA	NA	NA	NA
chr13	41010501	41017000	5Kb_1004	MDKO_M_586	6500	65.25	29.79	Up	1.13	2.5e-10	5.92e-09	Gcnt2	NM_133219	+	41013002	41056260	Promoter1k	748.5	NA	NA	NA	NA
chr13	40971801	40973800	2Kb_1609	MDKO_M_587	2000	21.47	7.83	Up	1.46	7.9e-07	1.09e-05	Gcnt2	NM_023887	+	40955500	41056260	Genebody	17300.5	NA	NA	NA	NA
chr13	40973001	40992000	10Kb_747	MDKO_M_588	19000	203.29	70.8	Up	1.52	2.5e-11	1.6e-09	Gcnt2	NM_023887	+	40955500	41056260	Genebody	27000.5	NA	NA	NA	NA
chr13	53070001	53082000	10Kb_777	MDKO_M_590	12000	132.2	65.83	Up	1.01	9.71e-10	1.28e-08	Nfil3	NM_017373	-	53062577	53076407	Promoter1k	406.5	NA	NA	NA	NA
chr13	101314001	101331000	10Kb_822	MDKO_M_592	17000	168.34	67.09	Up	1.33	3.61e-11	1.6e-09	Ocln	NM_008756	-	101267321	101322452	ProximalPromoter	-48.5	NA	NA	NA	NA
chr13	55512001	55523000	10Kb_785	MDKO_M_593	11000	125.93	62.61	Up	1.01	3.97e-10	5.89e-09	Pfn3	NM_029303	-	55516048	55516592	Promoter1k	-908.5	NA	NA	NA	NA
chr13	23936901	23937900	1kb_1794	MDKO_M_594	1000	11.67	3.06	Up	1.93	4.93e-06	7.89e-05	Slc17a3	NM_134069	+	23931302	23952582	Genebody	6098.5	NA	NA	NA	NA
chr13	34428001	34446000	10Kb_735	MDKO_M_595	18000	171.21	81.69	Up	1.07	2.27e-09	2.77e-08	Slc22a23	NM_001033167	-	34271026	34437050	ProximalPromoter	49.5	NA	NA	NA	NA
chr13	97752001	97762000	10Kb_815	MDKO_M_596	10000	96.39	45.99	Up	1.07	6.1e-12	1.6e-09	0	0	0	0	0	OtherIntergenic	NA	NA	NA	NA	NA
chr13	34870001	34872000	2Kb_1593	MDKO_M_597	2000	25.47	11.18	Up	1.19	6.78e-05	0.000586984	0	0	0	0	0	OtherIntergenic	NA	NA	NA	NA	NA
chr13	73539901	73540900	1kb_2011	MDKO_M_598	1000	15.97	6.71	Up	1.25	5.42e-05	0.000633003	0	0	0	0	0	OtherIntergenic	NA	NA	NA	NA	NA
chr13	21973401	21975600	2Kb_1547	MDKO_M_599	2200	30.88	12.69	Up	1.28	1.36e-05	0.000143816	0	0	0	0	0	OtherIntergenic	NA	NA	NA	NA	NA
chr13	21417401	21418400	1kb_1781	MDKO_M_600	1000	12.35	4.19	Up	1.56	6.84e-05	0.000768003	0	0	0	0	0	OtherIntergenic	NA	NA	NA	NA	NA
chr13	41331501	41337000	5Kb_1007	MDKO_M_601	5500	56.19	18.32	Up	1.62	2.93e-11	1.38e-09	0	0	0	0	0	OtherIntergenic	NA	NA	NA	NA	NA
chr7	26972401	26975200	2Kb_5314	MDKO_M_1806	2800	6.67	34.81	Down	-2.38	2.35e-13	5e-10	Cyp2b9	NM_010000	+	26958427	26995678	Genebody	15373.5	NA	NA	NA	NA
chr14	119153801	119157800	2Kb_2024	MDKO_M_603	4000	17.63	58.86	Down	-1.74	1.94e-09	4.65e-08	0	0	0	0	0	OtherIntergenic	NA	NA	NA	NA	NA
chr14	24090901	24091900	1kb_2148	MDKO_M_604	1000	3.93	13.16	Down	-1.74	7.02e-06	0.000108226	0	0	0	0	0	OtherIntergenic	NA	NA	NA	NA	NA
chr14	48949601	48950900	1kb_2191	MDKO_M_605	1300	5.59	18.5	Down	-1.73	2.81e-08	7.68e-07	0	0	0	0	0	OtherIntergenic	NA	NA	NA	NA	NA
chr14	45640201	45645800	2Kb_1877	MDKO_M_606	5600	24.6	74.2	Down	-1.59	1.84e-12	5e-10	0	0	0	0	0	OtherIntergenic	NA	NA	NA	NA	NA
chr7	26986401	26988400	2Kb_5315	MDKO_M_1807	2000	3.48	29.91	Down	-3.1	4.43e-10	1.28e-08	Cyp2b9	NM_010000	+	26958427	26995678	Genebody	28973.5	NA	NA	NA	NA
chr7	26991801	26994200	2Kb_5316	MDKO_M_1808	2400	7.19	30.46	Down	-2.08	1.69e-11	1.08e-09	Cyp2b9	NM_010000	+	26958427	26995678	Genebody	34573.5	NA	NA	NA	NA
chr14	62864601	62865600	1kb_2235	MDKO_M_609	1000	4.95	14.46	Down	-1.55	3.3e-05	0.000415421	0	0	0	0	0	OtherIntergenic	NA	NA	NA	NA	NA
chr14	50984001	50990000	5Kb_1176	MDKO_M_610	6000	21.16	61.56	Down	-1.54	1.08e-12	1.15e-09	0	0	0	0	0	OtherIntergenic	NA	NA	NA	NA	NA
chr14	62682101	62683100	1kb_2234	MDKO_M_611	1000	4.87	13.38	Down	-1.46	5.5e-05	0.00064034	0	0	0	0	0	OtherIntergenic	NA	NA	NA	NA	NA
chr14	59192401	59193500	1kb_2227	MDKO_M_612	1100	6.29	17.24	Down	-1.45	3.13e-05	0.00039779	0	0	0	0	0	Genedesert	NA	NA	NA	NA	NA
chr14	49009301	49010300	1kb_2192	MDKO_M_613	1000	5.03	13.52	Down	-1.43	2.33e-05	0.00030661	0	0	0	0	0	OtherIntergenic	NA	NA	NA	NA	NA
chr14	106178001	106183000	5Kb_1242	MDKO_M_614	5000	19.9	51.79	Down	-1.38	2.39e-08	3.55e-07	0	0	0	0	0	OtherIntergenic	NA	NA	NA	NA	NA
chr14	58939501	58940500	1kb_2226	MDKO_M_615	1000	5.3	13.67	Down	-1.37	6.72e-05	0.000758138	0	0	0	0	0	Genedesert	NA	NA	NA	NA	NA
chr14	101149001	101152000	2Kb_1979	MDKO_M_616	3000	12.71	32.32	Down	-1.35	1.04e-09	2.69e-08	0	0	0	0	0	Genedesert	NA	NA	NA	NA	NA
chr14	64249501	64250500	1kb_2243	MDKO_M_617	1000	6.41	15.89	Down	-1.31	8.78e-05	0.000939663	0	0	0	0	0	OtherIntergenic	NA	NA	NA	NA	NA
chr14	99969001	100007000	10Kb_903	MDKO_M_618	38000	195.21	462.96	Down	-1.25	8.73e-11	1.92e-09	0	0	0	0	0	OtherIntergenic	NA	NA	NA	NA	NA
chr14	62475801	62477800	2Kb_1916	MDKO_M_619	2000	11.02	25.89	Down	-1.23	1.82e-05	0.000185969	0	0	0	0	0	OtherIntergenic	NA	NA	NA	NA	NA
chr14	102342401	102343500	1kb_2296	MDKO_M_620	1100	7.74	18.02	Down	-1.22	9.06e-05	0.000962187	0	0	0	0	0	OtherIntergenic	NA	NA	NA	NA	NA
chr14	119134401	119142600	2Kb_2022	MDKO_M_621	8200	47.65	110.02	Down	-1.21	2.83e-11	1.45e-09	0	0	0	0	0	OtherIntergenic	NA	NA	NA	NA	NA
chr14	26195501	26200500	5Kb_1147	MDKO_M_622	5000	25.04	58.09	Down	-1.21	6.17e-09	1.03e-07	0	0	0	0	0	OtherIntergenic	NA	NA	NA	NA	NA
chr14	99964201	99966600	2Kb_1975	MDKO_M_623	2400	13.1	30.27	Down	-1.21	2.28e-08	4.29e-07	0	0	0	0	0	OtherIntergenic	NA	NA	NA	NA	NA
chr14	68084401	68085800	1kb_2255	MDKO_M_624	1400	8.14	18.84	Down	-1.21	9.12e-06	0.000135959	0	0	0	0	0	OtherIntergenic	NA	NA	NA	NA	NA
chr14	106332001	106344000	10Kb_914	MDKO_M_625	12000	46.93	106.74	Down	-1.19	2.64e-08	2.69e-07	0	0	0	0	0	OtherIntergenic	NA	NA	NA	NA	NA
chr14	69944601	69946800	2Kb_1938	MDKO_M_626	2200	17.96	40.69	Down	-1.18	1.55e-05	0.000161672	0	0	0	0	0	OtherIntergenic	NA	NA	NA	NA	NA
chr14	27842001	27844000	2Kb_1837	MDKO_M_627	2000	11.92	27.04	Down	-1.18	1.48e-05	0.00015509	0	0	0	0	0	OtherIntergenic	NA	NA	NA	NA	NA
chr14	17566001	17567000	1kb_2135	MDKO_M_628	1000	6.68	15.06	Down	-1.17	8.99e-05	0.00095584	0	0	0	0	0	Genedesert	NA	NA	NA	NA	NA
chr14	8894401	8895500	1kb_2109	MDKO_M_629	1100	7.32	16.28	Down	-1.15	3.53e-05	0.000439163	0	0	0	0	0	OtherIntergenic	NA	NA	NA	NA	NA
chr5	146218001	146220400	2Kb_4893	MDKO_M_1610	2400	5.65	40.89	Down	-2.86	4.47e-11	1.95e-09	Cyp3a16	NM_007820	-	146197177	146230591	Genebody	11390.5	NA	NA	NA	NA
chr14	45654801	45657400	2Kb_1878	MDKO_M_631	2600	15.19	33.46	Down	-1.14	2.45e-08	4.59e-07	0	0	0	0	0	OtherIntergenic	NA	NA	NA	NA	NA
chr5	146210001	146220000	10Kb_2261	MDKO_M_1611	10000	19.91	104.82	Down	-2.4	1.82e-12	1.6e-09	Cyp3a16	NM_007820	-	146197177	146230591	Genebody	15590.5	NA	NA	NA	NA
chr5	146210401	146213800	2Kb_4892	MDKO_M_1612	3400	10.01	43.81	Down	-2.13	2.46e-13	5e-10	Cyp3a16	NM_007820	-	146197177	146230591	Genebody	18490.5	NA	NA	NA	NA
chr14	9247001	9262000	10Kb_829	MDKO_M_634	15000	75.23	160.99	Down	-1.1	3.32e-10	5.05e-09	0	0	0	0	0	OtherIntergenic	NA	NA	NA	NA	NA
chr14	45669001	45674000	5Kb_1172	MDKO_M_635	5000	25.42	54.56	Down	-1.1	1.41e-10	3.72e-09	0	0	0	0	0	OtherIntergenic	NA	NA	NA	NA	NA
chr14	55815201	55817200	2Kb_1890	MDKO_M_636	2000	10.9	23.24	Down	-1.09	1.69e-05	0.000174278	0	0	0	0	0	OtherIntergenic	NA	NA	NA	NA	NA
chr14	55146001	55148600	2Kb_1886	MDKO_M_637	2600	23.74	49.22	Down	-1.05	4.23e-07	6.17e-06	0	0	0	0	0	OtherIntergenic	NA	NA	NA	NA	NA
chr14	67570601	67572600	2Kb_1933	MDKO_M_638	2000	11.94	24.73	Down	-1.05	3.3e-06	4.02e-05	0	0	0	0	0	OtherIntergenic	NA	NA	NA	NA	NA
chr5	146149901	146151300	1kb_5633	MDKO_M_1613	1400	5.68	17.11	Down	-1.59	2.43e-07	5.43e-06	Cyp3a57	NM_001100180	+	146106138	146151380	Genebody	44462.5	NA	NA	NA	NA
chr14	26059001	26061000	2Kb_1835	MDKO_M_640	2000	11.83	24.21	Down	-1.03	2.98e-05	0.000287839	0	0	0	0	0	OtherIntergenic	NA	NA	NA	NA	NA
chr14	63860001	63901000	10Kb_879	MDKO_M_641	41000	360.38	729.03	Down	-1.02	2.29e-09	2.8e-08	0	0	0	0	0	OtherIntergenic	NA	NA	NA	NA	NA
chr14	119161001	119171000	5Kb_1256	MDKO_M_642	10000	61.51	124.68	Down	-1.02	1.37e-11	1.17e-09	0	0	0	0	0	OtherIntergenic	NA	NA	NA	NA	NA
chr14	64278801	64280800	2Kb_1923	MDKO_M_643	2000	12.56	25.41	Down	-1.02	1.02e-05	0.000111647	0	0	0	0	0	OtherIntergenic	NA	NA	NA	NA	NA
chr14	25080801	25082000	1kb_2150	MDKO_M_644	1200	10.16	20.27	Down	-1	6.1e-05	0.000700221	0	0	0	0	0	OtherIntergenic	NA	NA	NA	NA	NA
chr12	109568801	109570800	2Kb_1499	MDKO_M_466	2000	12.08	24.32	Down	-1.01	6.82e-05	0.000589399	Cyp46a1	NM_010010	+	109572590	109600443	Promoter3k	-2789.5	NA	NA	NA	NA
chr3	145314201	145316800	2Kb_4012	MDKO_M_1341	2600	16.5	35.75	Down	-1.12	8.18e-07	1.13e-05	Cyr61	NM_010516	-	145309934	145312948	Promoter3k	-2552.5	NA	NA	NA	NA
chr11	61892701	61893700	1kb_1093	MDKO_M_341	1000	11.01	22.69	Down	-1.04	3.75e-05	0.0004635	Cytsb	NM_001029936	+	61890598	62036514	Promoter3k	2602.5	NA	NA	NA	NA
chr15	6335501	6341000	5Kb_1266	MDKO_M_726	5500	28.03	56.67	Down	-1.02	6.18e-10	1.28e-08	Dab2	NM_001102400	+	6336747	6390708	Promoter3k	1503.5	NA	NA	NA	NA
chr3	137642601	137644600	2Kb_3981	MDKO_M_1342	2000	6.14	26.98	Down	-2.13	2.5e-12	5.29e-10	Dapp1	NM_011932	-	137593969	137644512	Promoter1k	911.5	NA	NA	NA	NA
chr3	137615501	137621500	5Kb_2498	MDKO_M_1343	6000	26.15	60.19	Down	-1.2	2.52e-08	3.72e-07	Dapp1	NM_011932	-	137593969	137644512	Genebody	26011.5	NA	NA	NA	NA
chr4	68585801	68588000	2Kb_4204	MDKO_M_1472	2200	10.65	25.57	Down	-1.26	5.18e-08	8.99e-07	Dbc1	NM_019967	-	68422405	68615430	Genebody	28529.5	NA	NA	NA	NA
chr10	51953001	51964000	10Kb_252	MDKO_M_247	11000	39.97	107.26	Down	-1.42	8.69e-12	1.6e-09	Dcbld1	NM_025705	+	51953424	52041182	Genebody	5076.5	NA	NA	NA	NA
chr3	86593001	86598000	5Kb_2406	MDKO_M_1344	5000	26.3	56.73	Down	-1.11	1.6e-10	4.11e-09	Dclk2	NM_027539	-	86590072	86724802	Genebody	129302	NA	NA	NA	NA
chr3	86647801	86650200	2Kb_3837	MDKO_M_1345	2400	14.54	30.51	Down	-1.07	6.11e-07	8.63e-06	Dclk2	NM_027539	-	86590072	86724802	Genebody	75801.5	NA	NA	NA	NA
chr6	39487801	39488900	1kb_5754	MDKO_M_1726	1100	4.57	13.79	Down	-1.6	6.25e-06	9.75e-05	Dennd2a	NM_172477	-	39412376	39507832	Genebody	19481.5	NA	NA	NA	NA
chr13	109106501	109107600	1kb_2081	MDKO_M_552	1100	7.39	17.06	Down	-1.21	5.57e-05	0.0006475	Depdc1b	NM_178683	+	109106530	109179750	Promoter1k	520.5	NA	NA	NA	NA
chr12	38846801	38849200	2Kb_1354	MDKO_M_467	2400	12.44	26.38	Down	-1.08	1.38e-06	1.83e-05	Dgkb	NM_178681	+	38607291	39359996	Genebody	240710	NA	NA	NA	NA
chr14	87148601	87150600	2Kb_1971	MDKO_M_648	2000	9.81	29.28	Down	-1.58	3.96e-08	7.08e-07	Diap3	NM_019670	-	87056129	87540920	Genebody	391320	NA	NA	NA	NA
chr8	127658601	127660600	2Kb_6070	MDKO_M_2050	2000	10.73	25.4	Down	-1.24	4.05e-07	5.93e-06	Disc1	NM_174854	+	127578094	127785050	Genebody	81506.5	NA	NA	NA	NA
chr3	131750701	131751700	1kb_4578	MDKO_M_1346	1000	6.78	15.23	Down	-1.17	8.46e-05	0.000912579	Dkk2	NM_020265	+	131748255	131843265	Promoter3k	2945.5	NA	NA	NA	NA
chr7	98578301	98579300	1kb_6338	MDKO_M_1845	1000	4.97	13.93	Down	-1.49	2.31e-05	0.000304571	Dlg2	NM_011807	+	98239295	99597598	Genebody	339506	NA	NA	NA	NA
chr12	119190001	119215000	10Kb_706	MDKO_M_468	25000	125.75	269.5	Down	-1.1	5.56e-09	6.28e-08	Dnahc11	NM_010060	-	119116454	119437515	Genebody	235014	NA	NA	NA	NA
chr17	31010401	31012400	2Kb_2568	MDKO_M_889	2000	12.83	25.96	Down	-1.02	4.65e-05	0.000424957	Dnahc8	NM_013811	+	30763880	31012208	Genebody	247520	NA	NA	NA	NA
chr12	84708001	84739000	10Kb_672	MDKO_M_469	31000	161.65	418.59	Down	-1.37	1.04e-09	1.36e-08	Dpf3	NM_058212	-	84370184	84828657	Genebody	105156	NA	NA	NA	NA
chr14	67477001	67495000	10Kb_888	MDKO_M_649	18000	79.05	170.06	Down	-1.11	6.8e-11	1.74e-09	Dpysl2	NM_009955	-	67421700	67487436	Promoter3k	1435.5	NA	NA	NA	NA
chr9	49156801	49158800	2Kb_6217	MDKO_M_2160	2000	9.97	23.4	Down	-1.23	3.4e-06	4.13e-05	Drd2	NM_010077	+	49148766	49215318	Genebody	9034.5	NA	NA	NA	NA
chr16	97228301	97229300	1kb_2905	MDKO_M_820	1000	5.48	14.69	Down	-1.42	2.77e-05	0.00035626	Dscam	NM_031174	-	96813686	97392341	Genebody	163540	NA	NA	NA	NA
chr14	8831601	8833600	2Kb_1809	MDKO_M_668	2000	22.95	9.3	Up	1.3	3.88e-05	0.000362872	Abhd6	NM_025341	+	8835415	8889068	Promoter3k	-2814.5	NA	NA	NA	NA
chr14	70883001	70946000	10Kb_895	MDKO_M_669	63000	762.81	342.96	Up	1.15	2.49e-09	3.01e-08	Bmp1	NM_009755	-	70874361	70920066	Genebody	5565.5	NA	NA	NA	NA
chr14	65703001	65713000	10Kb_883	MDKO_M_670	10000	98.84	46.55	Up	1.09	1.49e-10	2.7e-09	Extl3	NM_018788	-	65670896	65716942	Genebody	8941.5	NA	NA	NA	NA
chr14	57716001	57735000	10Kb_868	MDKO_M_671	19000	217.48	105.33	Up	1.05	9.29e-11	2e-09	Gjb2	NM_008125	-	57717438	57723538	Promoter3k	-1962.5	NA	NA	NA	NA
chr14	30817001	30827000	10Kb_844	MDKO_M_672	10000	100.23	39.72	Up	1.34	5.48e-12	1.6e-09	Il17rb	NM_019583	-	30809353	30822081	ProximalPromoter	80.5	NA	NA	NA	NA
chr14	55190001	55195500	5Kb_1177	MDKO_M_673	5500	56.53	26.11	Up	1.11	3.81e-10	8.42e-09	Jub	NM_010590	-	55186308	55196252	Genebody	3501.5	NA	NA	NA	NA
chr14	66896001	66902500	5Kb_1202	MDKO_M_674	6500	79.02	35.82	Up	1.14	3.89e-11	1.55e-09	Ptk2b	NM_172498	-	66772093	66899888	Promoter1k	637.5	NA	NA	NA	NA
chr14	48377401	48379400	2Kb_1881	MDKO_M_675	2000	26.88	12.38	Up	1.12	4.77e-06	5.61e-05	0	0	0	0	0	OtherIntergenic	NA	NA	NA	NA	NA
chr14	18488001	18500000	10Kb_835	MDKO_M_676	12000	106.16	38.8	Up	1.45	6.1e-12	1.6e-09	Thrb	NM_001113417	+	18493473	18870601	Promoter1k	527.5	NA	NA	NA	NA
chr14	56078001	56092000	10Kb_864	MDKO_M_677	14000	134.37	52.61	Up	1.35	1.24e-11	1.6e-09	0	0	0	0	0	OtherIntergenic	NA	NA	NA	NA	NA
chr14	29318001	29320000	2Kb_1845	MDKO_M_678	2000	27.99	13.26	Up	1.08	7.06e-05	0.000606508	Wnt5a	NM_009524	+	29318658	29338619	Promoter1k	342.5	NA	NA	NA	NA
chr15	60828901	60829900	1kb_2472	MDKO_M_679	1000	3	12.57	Down	-2.07	6.52e-07	1.31e-05	0	0	0	0	0	Genedesert	NA	NA	NA	NA	NA
chr10	33918001	33935000	10Kb_236	MDKO_M_248	17000	73.81	156.99	Down	-1.09	7.72e-10	1.05e-08	Dse	NM_172508	-	33871198	33927356	Promoter1k	855.5	NA	NA	NA	NA
chr13	45097901	45098900	1kb_1897	MDKO_M_553	1000	7.33	16.9	Down	-1.21	8.37e-05	0.000905746	Dtnbp1	NM_025772	-	45017448	45097464	Promoter1k	-936.5	NA	NA	NA	NA
chr15	60822801	60823900	1kb_2471	MDKO_M_682	1100	5.18	16.05	Down	-1.63	1.5e-05	0.000209843	0	0	0	0	0	Genedesert	NA	NA	NA	NA	NA
chr15	98830601	98833000	2Kb_2245	MDKO_M_683	2400	10.07	29.74	Down	-1.56	1.36e-09	3.4e-08	0	0	0	0	0	OtherIntergenic	NA	NA	NA	NA	NA
chr15	58953801	58954800	1kb_2458	MDKO_M_684	1000	5.48	16	Down	-1.55	4.88e-06	7.82e-05	0	0	0	0	0	OtherIntergenic	NA	NA	NA	NA	NA
chr19	53601001	53607600	2Kb_3138	MDKO_M_1060	6600	35.64	108.38	Down	-1.6	7.79e-11	2.96e-09	Dusp5	NM_001085390	+	53603807	53615811	Promoter1k	493.5	NA	NA	NA	NA
chr18	75343801	75344800	1kb_3397	MDKO_M_979	1000	5.12	14.03	Down	-1.45	3.51e-05	0.00043704	Dym	NM_027727	+	75178425	75446619	Genebody	165876	NA	NA	NA	NA
chr18	75326001	75338000	10Kb_1328	MDKO_M_980	12000	64.11	132.63	Down	-1.05	3.46e-10	5.24e-09	Dym	NM_027727	+	75178425	75446619	Genebody	153576	NA	NA	NA	NA
chr6	84009501	84010500	1kb_5874	MDKO_M_1727	1000	4.46	15.04	Down	-1.75	8.44e-06	0.000126977	Dysf	NM_021469	+	83969382	84161035	Genebody	40618.5	NA	NA	NA	NA
chr6	84088601	84089600	1kb_5876	MDKO_M_1728	1000	5.17	14.26	Down	-1.46	1.91e-05	0.000258257	Dysf	NM_021469	+	83969382	84161035	Genebody	119718	NA	NA	NA	NA
chr6	84028301	84029300	1kb_5875	MDKO_M_1729	1000	4.87	13.05	Down	-1.42	6.84e-05	0.000768003	Dysf	NM_021469	+	83969382	84161035	Genebody	59418.5	NA	NA	NA	NA
chr14	119310201	119311200	1kb_2359	MDKO_M_650	1000	5.73	14.64	Down	-1.35	7.52e-05	0.000829996	Dzip1	NM_025943	-	119274741	119322388	Genebody	11687.5	NA	NA	NA	NA
chr15	38273601	38275600	2Kb_2085	MDKO_M_692	2000	8.61	23.27	Down	-1.43	1.57e-07	2.47e-06	0	0	0	0	0	OtherIntergenic	NA	NA	NA	NA	NA
chr15	67852001	67866000	10Kb_964	MDKO_M_693	14000	52.19	139.31	Down	-1.42	4.87e-11	1.61e-09	0	0	0	0	0	OtherIntergenic	NA	NA	NA	NA	NA
chr15	90909001	90910500	1kb_2596	MDKO_M_694	1500	5.98	16	Down	-1.42	1.14e-05	0.000165685	0	0	0	0	0	OtherIntergenic	NA	NA	NA	NA	NA
chr15	67843701	67844700	1kb_2478	MDKO_M_695	1000	5.16	13.86	Down	-1.42	2.31e-05	0.000304571	0	0	0	0	0	OtherIntergenic	NA	NA	NA	NA	NA
chr15	60720001	60764000	10Kb_961	MDKO_M_696	44000	222.88	589.86	Down	-1.4	8.41e-10	1.13e-08	0	0	0	0	0	OtherIntergenic	NA	NA	NA	NA	NA
chr15	57003801	57004900	1kb_2454	MDKO_M_697	1100	6.05	15.31	Down	-1.34	1.17e-05	0.000169124	0	0	0	0	0	OtherIntergenic	NA	NA	NA	NA	NA
chr15	67867001	67892000	10Kb_965	MDKO_M_698	25000	114.55	285.41	Down	-1.32	2.19e-10	3.6e-09	0	0	0	0	0	OtherIntergenic	NA	NA	NA	NA	NA
chr15	83946001	83981000	10Kb_1008	MDKO_M_699	35000	186.19	460.76	Down	-1.31	1.34e-09	1.71e-08	0	0	0	0	0	OtherIntergenic	NA	NA	NA	NA	NA
chr11	44571001	44572100	1kb_997	MDKO_M_342	1100	5.6	15.44	Down	-1.46	5.3e-05	0.000622598	Ebf1	NM_007897	+	44431635	44818673	Genebody	139916	NA	NA	NA	NA
chr15	44628001	44638000	10Kb_954	MDKO_M_701	10000	47.81	117.04	Down	-1.29	1.12e-09	1.46e-08	0	0	0	0	0	OtherIntergenic	NA	NA	NA	NA	NA
chr15	96760001	96765000	5Kb_1402	MDKO_M_702	5000	23.56	56.94	Down	-1.27	1.87e-11	1.22e-09	0	0	0	0	0	OtherIntergenic	NA	NA	NA	NA	NA
chr15	60569001	60587000	10Kb_960	MDKO_M_703	18000	81.97	193.49	Down	-1.24	2.84e-08	2.88e-07	0	0	0	0	0	OtherIntergenic	NA	NA	NA	NA	NA
chr15	79284601	79286000	1kb_2539	MDKO_M_704	1400	7.87	18.41	Down	-1.23	3.83e-05	0.000470673	0	0	0	0	0	OtherIntergenic	NA	NA	NA	NA	NA
chr14	67888901	67889900	1kb_2254	MDKO_M_651	1000	5.08	13.6	Down	-1.42	9.79e-05	0.00102569	Ebf2	NM_010095	+	67852128	68048603	Genebody	37272.5	NA	NA	NA	NA
chr15	92653501	92659000	5Kb_1396	MDKO_M_706	5500	27.37	62.59	Down	-1.19	2.56e-08	3.78e-07	0	0	0	0	0	OtherIntergenic	NA	NA	NA	NA	NA
chr15	37744601	37745600	1kb_2419	MDKO_M_707	1000	7.32	16.54	Down	-1.18	8.37e-05	0.000905746	0	0	0	0	0	OtherIntergenic	NA	NA	NA	NA	NA
chr15	44688801	44692000	2Kb_2101	MDKO_M_708	3200	16.46	37.12	Down	-1.17	2.02e-08	3.83e-07	0	0	0	0	0	OtherIntergenic	NA	NA	NA	NA	NA
chr15	11996001	11998800	2Kb_2071	MDKO_M_709	2800	15.49	33.77	Down	-1.12	1.81e-08	3.47e-07	0	0	0	0	0	OtherIntergenic	NA	NA	NA	NA	NA
chr15	56165001	56167400	2Kb_2108	MDKO_M_710	2400	14.93	32.32	Down	-1.11	3.86e-06	4.63e-05	0	0	0	0	0	OtherIntergenic	NA	NA	NA	NA	NA
chr15	90922001	90939000	10Kb_1021	MDKO_M_711	17000	84.84	180.15	Down	-1.09	2.74e-07	2.45e-06	0	0	0	0	0	OtherIntergenic	NA	NA	NA	NA	NA
chr15	81796201	81798400	2Kb_2185	MDKO_M_712	2200	12.55	26.73	Down	-1.09	1.44e-05	0.000151672	0	0	0	0	0	OtherIntergenic	NA	NA	NA	NA	NA
chr15	60933001	60940000	5Kb_1316	MDKO_M_713	7000	41.1	86.61	Down	-1.08	4.77e-09	8.16e-08	0	0	0	0	0	Genedesert	NA	NA	NA	NA	NA
chr15	51045001	51051000	5Kb_1309	MDKO_M_714	6000	28.19	59.56	Down	-1.08	3.81e-11	1.54e-09	0	0	0	0	0	OtherIntergenic	NA	NA	NA	NA	NA
chr15	38312001	38319000	5Kb_1297	MDKO_M_715	7000	34.38	72.05	Down	-1.07	1.49e-07	1.93e-06	0	0	0	0	0	OtherIntergenic	NA	NA	NA	NA	NA
chr15	88010001	88012400	2Kb_2211	MDKO_M_716	2400	15.31	31.94	Down	-1.06	3.65e-06	4.41e-05	0	0	0	0	0	OtherIntergenic	NA	NA	NA	NA	NA
chr15	97403801	97405800	2Kb_2230	MDKO_M_717	2000	13.27	27.7	Down	-1.06	1.88e-06	2.43e-05	0	0	0	0	0	OtherIntergenic	NA	NA	NA	NA	NA
chr15	88010001	88042000	10Kb_1017	MDKO_M_718	32000	166.25	338.75	Down	-1.03	1.03e-10	2.11e-09	0	0	0	0	0	OtherIntergenic	NA	NA	NA	NA	NA
chr7	148644501	148653000	5Kb_3531	MDKO_M_1899	8500	34.18	99.93	Down	-1.55	1.95e-11	1.22e-09	Efcab4a	NM_001025103	+	148646992	148652500	Promoter3k	1758.5	NA	NA	NA	NA
chr17	63202001	63203000	1kb_3081	MDKO_M_890	1000	5.95	14.82	Down	-1.32	8.93e-05	0.000951129	Efna5	NM_010109	-	62952305	63230665	Genebody	28164.5	NA	NA	NA	NA
chr2	26439401	26441400	2Kb_3241	MDKO_M_1174	2000	10.12	24.73	Down	-1.29	7.56e-07	1.05e-05	Egfl7	NM_198724	+	26439383	26448200	Promoter3k	1017.5	NA	NA	NA	NA
chr15	28100401	28102400	2Kb_2078	MDKO_M_722	2000	13.6	27.15	Down	-1	1.8e-05	0.000184391	0	0	0	0	0	OtherIntergenic	NA	NA	NA	NA	NA
chr15	7041801	7044000	2Kb_2041	MDKO_M_723	2200	12.21	24.35	Down	-1	3.87e-05	0.000361337	0	0	0	0	0	OtherIntergenic	NA	NA	NA	NA	NA
chr15	67908401	67910600	2Kb_2129	MDKO_M_724	2200	12.16	24.29	Down	-1	1.65e-05	0.00017083	0	0	0	0	0	OtherIntergenic	NA	NA	NA	NA	NA
chr15	7194601	7197000	2Kb_2042	MDKO_M_727	2400	16.59	34.29	Down	-1.05	3.95e-07	5.81e-06	Egflam	NM_178748	-	7156119	7348303	Genebody	152502	NA	NA	NA	NA
chr8	127436001	127446000	10Kb_2794	MDKO_M_2051	10000	38.08	111.76	Down	-1.55	5e-12	1.6e-09	Egln1	NM_053207	-	127432486	127473153	Genebody	32152.5	NA	NA	NA	NA
chr8	127447001	127461000	10Kb_2795	MDKO_M_2052	14000	52.51	125.66	Down	-1.26	1.74e-11	1.6e-09	Egln1	NM_053207	-	127432486	127473153	Genebody	19152.5	NA	NA	NA	NA
chr15	72976001	73016000	10Kb_967	MDKO_M_728	40000	142.96	557.21	Down	-1.96	2.32e-09	2.83e-08	Eif2c2	NM_153178	-	72932054	73015376	Genebody	19375.5	NA	NA	NA	NA
chr10	92722601	92725200	2Kb_662	MDKO_M_249	2600	6.47	30.58	Down	-2.24	3.71e-13	5e-10	Elk3	NM_013508	-	92710160	92773903	Genebody	50002.5	NA	NA	NA	NA
chr10	92738201	92741000	2Kb_663	MDKO_M_250	2800	13.46	36.34	Down	-1.43	5.59e-11	2.28e-09	Elk3	NM_013508	-	92710160	92773903	Genebody	34302.5	NA	NA	NA	NA
chr11	29657001	29723000	10Kb_357	MDKO_M_343	66000	291.25	828.13	Down	-1.51	1.05e-09	1.38e-08	Eml6	NM_146016	-	29643050	29926032	Genebody	236032	NA	NA	NA	NA
chr7	53174501	53180500	5Kb_3344	MDKO_M_1824	6000	30.53	69.56	Down	-1.19	1.01e-11	1.17e-09	Emp3	NM_010129	-	53173392	53176795	Promoter1k	-705.5	NA	NA	NA	NA
chr19	40753301	40754400	1kb_3585	MDKO_M_1061	1100	6.46	16.78	Down	-1.38	1.58e-05	0.000218913	Entpd1	NM_009848	+	40734283	40816091	Genebody	19567.5	NA	NA	NA	NA
chr17	88034201	88035200	1kb_3169	MDKO_M_891	1000	8.51	19.44	Down	-1.19	9.95e-05	0.00103887	Epcam	NM_008532	+	88035318	88050466	Promoter1k	-617.5	NA	NA	NA	NA
chr16	59854001	59856600	2Kb_2407	MDKO_M_821	2600	12.91	33.04	Down	-1.36	1.25e-09	3.16e-08	Epha6	NM_007938	-	59653308	60605356	Genebody	750056	NA	NA	NA	NA
chr9	21762401	21770000	2Kb_6106	MDKO_M_2161	7600	50.34	159.68	Down	-1.67	4.32e-11	1.9e-09	Epor	NM_010149	-	21763342	21768019	Promoter3k	1818.5	NA	NA	NA	NA
chr14	28975601	28978400	2Kb_1841	MDKO_M_652	2800	16.87	35.46	Down	-1.07	2.07e-06	2.64e-05	Erc2	NM_177814	+	28435627	29291722	Genebody	541374	NA	NA	NA	NA
chr1	189937001	189949000	10Kb_205	MDKO_M_84	12000	57.13	126.68	Down	-1.15	1.34e-09	1.72e-08	Esrrg	NM_011935	+	189821737	190038762	Genebody	121264	NA	NA	NA	NA
chr6	84641401	84663400	2Kb_5100	MDKO_M_1730	22000	96.1	424.48	Down	-2.14	3.06e-10	9.31e-09	Exoc6b	NM_177077	-	84568480	85019506	Genebody	367106	NA	NA	NA	NA
chr6	84721001	84732000	10Kb_2357	MDKO_M_1731	11000	44.49	115.24	Down	-1.37	2.15e-11	1.6e-09	Exoc6b	NM_177077	-	84568480	85019506	Genebody	293006	NA	NA	NA	NA
chr6	84575001	84610000	10Kb_2355	MDKO_M_1732	35000	192.83	452.83	Down	-1.23	1.28e-09	1.65e-08	Exoc6b	NM_177077	-	84568480	85019506	Genebody	427006	NA	NA	NA	NA
chr6	84638401	84641000	2Kb_5099	MDKO_M_1733	2600	15.43	35.13	Down	-1.19	6.86e-09	1.43e-07	Exoc6b	NM_177077	-	84568480	85019506	Genebody	379806	NA	NA	NA	NA
chr6	84671001	84696000	10Kb_2356	MDKO_M_1734	25000	121.65	266.93	Down	-1.13	2.36e-10	3.83e-09	Exoc6b	NM_177077	-	84568480	85019506	Genebody	336006	NA	NA	NA	NA
chr6	84618001	84620000	2Kb_5098	MDKO_M_1735	2000	11.62	23.69	Down	-1.03	5.71e-05	0.00050781	Exoc6b	NM_177077	-	84568480	85019506	Genebody	400506	NA	NA	NA	NA
chr19	10107001	10126000	10Kb_1359	MDKO_M_1062	19000	92.16	203.88	Down	-1.15	3.61e-11	1.6e-09	Fads3	NM_021890	+	10116037	10134160	Promoter1k	463.5	NA	NA	NA	NA
chr3	108827001	108837000	10Kb_1830	MDKO_M_1347	10000	41.72	107.61	Down	-1.37	7.8e-11	1.82e-09	Fam102b	NM_001163567	-	108773915	108830524	Promoter3k	-1476.5	NA	NA	NA	NA
chr15	82170601	82172600	2Kb_2188	MDKO_M_729	2000	8.69	23.74	Down	-1.45	2.28e-07	3.47e-06	Fam109b	NM_177391	+	82171608	82176139	ProximalPromoter	-7.5	NA	NA	NA	NA
chr2	33590001	33592200	2Kb_3281	MDKO_M_1175	2200	11.82	27.84	Down	-1.24	3.52e-05	0.000333474	Fam125b	NM_175184	-	33585475	33743465	Genebody	152364	NA	NA	NA	NA
chr2	33739001	33745500	5Kb_2058	MDKO_M_1176	6500	29.05	65.99	Down	-1.18	6.71e-12	1.15e-09	Fam125b	NM_175184	-	33585475	33743465	Promoter3k	1214.5	NA	NA	NA	NA
chr3	7502201	7505800	2Kb_3727	MDKO_M_1348	3600	15.9	43.46	Down	-1.45	4.05e-11	1.82e-09	Fam164a	NM_173181	+	7503425	7553847	Promoter1k	575.5	NA	NA	NA	NA
chr4	129252001	129258500	5Kb_2717	MDKO_M_1473	6500	29.42	65.3	Down	-1.15	8.57e-12	1.15e-09	Fam167b	NM_182783	-	129254058	129255823	Promoter1k	572.5	NA	NA	NA	NA
chr13	78265801	78267800	2Kb_1745	MDKO_M_554	2000	7.01	23.9	Down	-1.77	1.28e-09	3.24e-08	Fam172a	NM_138312	+	77847950	78305498	Genebody	418850	NA	NA	NA	NA
chr15	78965201	78967400	2Kb_2173	MDKO_M_753	2200	26.01	11.39	Up	1.19	1.59e-06	2.08e-05	1700088E04Rik	NM_138581	-	78965084	78971680	Genebody	5379.5	NA	NA	NA	NA
chr15	75945001	75955000	10Kb_982	MDKO_M_754	10000	95.43	32.53	Up	1.55	1.07e-11	1.6e-09	BC024139	NM_001142968	-	75949949	75956985	Genebody	6984.5	NA	NA	NA	NA
chr15	91881101	91882500	1kb_2599	MDKO_M_755	1400	34.86	16.71	Up	1.06	7.2e-06	0.000110548	Cntn1	NM_001159648	+	91881595	92172397	ProximalPromoter	205.5	NA	NA	NA	NA
chr15	39686501	39692500	5Kb_1298	MDKO_M_756	6000	59.14	19.95	Up	1.57	1.54e-11	1.19e-09	Dpys	NM_001164466	-	39614243	39689015	Promoter1k	-485.5	NA	NA	NA	NA
chr15	75816001	75847000	10Kb_980	MDKO_M_757	31000	478.37	197.72	Up	1.27	1.81e-08	1.89e-07	Fam83h	NM_001168253	-	75831522	75839927	Genebody	8426.5	NA	NA	NA	NA
chr15	38837501	38838700	1kb_2423	MDKO_M_758	1200	17.41	6.85	Up	1.35	1.9e-05	0.000257272	Fzd6	NM_008056	+	38837878	38869733	ProximalPromoter	222.5	NA	NA	NA	NA
chr15	79008901	79009900	1kb_2538	MDKO_M_759	1000	14.34	4.2	Up	1.77	1.44e-05	0.000202753	Gm10863	NR_029470	+	78996495	79046830	Genebody	12905.5	NA	NA	NA	NA
chr15	101854001	101867000	10Kb_1045	MDKO_M_760	13000	136.1	42.32	Up	1.69	1.47e-11	1.6e-09	Krt18	NM_010664	+	101858646	101862456	Promoter3k	1854.5	NA	NA	NA	NA
chr15	54401601	54403600	2Kb_2106	MDKO_M_761	2000	22.49	7.59	Up	1.57	2.34e-08	4.4e-07	Mal2	NM_178920	+	54402920	54434400	Promoter1k	-319.5	NA	NA	NA	NA
chr15	75911001	75932000	10Kb_981	MDKO_M_762	21000	246.81	107.52	Up	1.2	2.27e-10	3.7e-09	Nrbp2	NM_144847	-	75916023	75920442	Promoter3k	-1058.5	NA	NA	NA	NA
chr15	89207501	89213500	5Kb_1390	MDKO_M_763	6000	76.06	28.7	Up	1.41	9.58e-10	1.89e-08	Odf3b	NM_001013022	-	89207879	89209684	Promoter1k	-816.5	NA	NA	NA	NA
chr15	85558001	85568000	10Kb_1015	MDKO_M_764	10000	107.78	35.94	Up	1.58	3.65e-10	5.47e-09	Ppara	NM_001113418	+	85565993	85637280	Promoter3k	-2992.5	NA	NA	NA	NA
chr15	98502501	98510500	5Kb_1410	MDKO_M_766	8000	79.64	35.1	Up	1.18	6.48e-09	1.08e-07	Rnd1	NM_172612	-	98499635	98507891	Promoter3k	1390.5	NA	NA	NA	NA
chr15	55737601	55738600	1kb_2452	MDKO_M_767	1000	12.55	2.84	Up	2.14	4.52e-07	9.48e-06	Sntb1	NM_016667	-	55470708	55738503	Promoter1k	402.5	NA	NA	NA	NA
chr15	79941701	79942700	1kb_2545	MDKO_M_769	1000	14.9	4.76	Up	1.65	7.57e-05	0.000835192	Syngr1	NM_009303	+	79921763	79943869	Genebody	20437.5	NA	NA	NA	NA
chr15	101830001	101846000	10Kb_1044	MDKO_M_770	16000	168.05	78.78	Up	1.09	3.89e-11	1.6e-09	0	0	0	0	0	OtherIntergenic	NA	NA	NA	NA	NA
chr15	84298801	84299800	1kb_2575	MDKO_M_771	1000	16.54	6.88	Up	1.27	8.99e-05	0.000955865	0	0	0	0	0	OtherIntergenic	NA	NA	NA	NA	NA
chr15	55096001	55099000	2Kb_2107	MDKO_M_772	3000	35.68	11.82	Up	1.59	2.35e-12	5.28e-10	0	0	0	0	0	OtherIntergenic	NA	NA	NA	NA	NA
chr15	28000201	28001200	1kb_2411	MDKO_M_773	1000	12.48	4.03	Up	1.63	2.76e-05	0.000355496	0	0	0	0	0	OtherIntergenic	NA	NA	NA	NA	NA
chr15	78853001	78858000	5Kb_1354	MDKO_M_774	5000	52.76	15.84	Up	1.74	1.32e-12	1.15e-09	0	0	0	0	0	OtherIntergenic	NA	NA	NA	NA	NA
chr16	41142801	41143900	1kb_2784	MDKO_M_775	1100	2.83	13.9	Down	-2.3	7.52e-09	2.35e-07	0	0	0	0	0	Genedesert	NA	NA	NA	NA	NA
chr16	86318901	86319900	1kb_2853	MDKO_M_776	1000	2.88	13.28	Down	-2.21	8.43e-08	2.08e-06	0	0	0	0	0	Genedesert	NA	NA	NA	NA	NA
chr16	25546101	25547300	1kb_2730	MDKO_M_777	1200	3.95	15.76	Down	-2	1.56e-07	3.62e-06	0	0	0	0	0	OtherIntergenic	NA	NA	NA	NA	NA
chr16	86370801	86373800	2Kb_2436	MDKO_M_778	3000	10.66	37.24	Down	-1.81	1.31e-12	5e-10	0	0	0	0	0	Genedesert	NA	NA	NA	NA	NA
chr16	84949201	84950500	1kb_2849	MDKO_M_779	1300	4.59	16.04	Down	-1.81	1.45e-07	3.39e-06	0	0	0	0	0	OtherIntergenic	NA	NA	NA	NA	NA
chr16	15547201	15548500	1kb_2712	MDKO_M_780	1300	5.36	18.45	Down	-1.78	1.17e-06	2.22e-05	0	0	0	0	0	OtherIntergenic	NA	NA	NA	NA	NA
chr16	95951001	95952000	1kb_2901	MDKO_M_781	1000	4.81	16.49	Down	-1.78	9.3e-06	0.000138134	0	0	0	0	0	OtherIntergenic	NA	NA	NA	NA	NA
chr13	78239201	78241200	2Kb_1744	MDKO_M_555	2000	10.14	24.83	Down	-1.29	2.07e-07	3.19e-06	Fam172a	NM_138312	+	77847950	78305498	Genebody	392250	NA	NA	NA	NA
chr16	76132801	76135200	2Kb_2421	MDKO_M_783	2400	8.68	29.31	Down	-1.76	5.44e-09	1.16e-07	0	0	0	0	0	OtherIntergenic	NA	NA	NA	NA	NA
chr4	125822501	125831000	5Kb_2702	MDKO_M_1474	8500	29.11	89.99	Down	-1.63	4.97e-12	1.15e-09	Fam176b	NM_172145	+	125825246	125827117	Promoter3k	1504.5	NA	NA	NA	NA
chr3	58440101	58441100	1kb_4362	MDKO_M_1349	1000	8.52	19.67	Down	-1.21	4.4e-05	0.00053181	Fam194a	NM_001081262	-	58420221	58441128	Promoter1k	527.5	NA	NA	NA	NA
chr16	76143001	76170000	10Kb_1118	MDKO_M_786	27000	110.33	330.23	Down	-1.58	3.57e-10	5.35e-09	0	0	0	0	0	OtherIntergenic	NA	NA	NA	NA	NA
chr16	86377601	86378900	1kb_2855	MDKO_M_787	1300	6.51	19.34	Down	-1.57	3.88e-06	6.39e-05	0	0	0	0	0	Genedesert	NA	NA	NA	NA	NA
chr10	122970001	122971400	1kb_833	MDKO_M_251	1400	4.84	17.46	Down	-1.85	3.91e-08	1.04e-06	Fam19a2	NM_182807	+	122701131	123178034	Genebody	269570	NA	NA	NA	NA
chr16	64127601	64128700	1kb_2817	MDKO_M_789	1100	5.44	15.62	Down	-1.52	1.42e-05	0.000200442	0	0	0	0	0	OtherIntergenic	NA	NA	NA	NA	NA
chr16	47205401	47207600	2Kb_2384	MDKO_M_790	2200	11.19	31.96	Down	-1.51	3.13e-08	5.7e-07	0	0	0	0	0	Genedesert	NA	NA	NA	NA	NA
chr16	50752501	50753500	1kb_2792	MDKO_M_791	1000	4.48	12.54	Down	-1.49	2.84e-05	0.000364337	0	0	0	0	0	Genedesert	NA	NA	NA	NA	NA
chr8	125074001	125075000	1kb_7055	MDKO_M_2053	1000	3.98	13.72	Down	-1.78	4.37e-06	7.11e-05	Fam38a	NM_001037298	-	125005598	125075228	Promoter1k	727.5	NA	NA	NA	NA
chr16	39119401	39120400	1kb_2783	MDKO_M_793	1000	5.11	13.76	Down	-1.43	9.79e-05	0.00102569	0	0	0	0	0	Genedesert	NA	NA	NA	NA	NA
chr16	76747001	76764000	10Kb_1120	MDKO_M_794	17000	67.61	181.26	Down	-1.42	3.17e-11	1.6e-09	0	0	0	0	0	OtherIntergenic	NA	NA	NA	NA	NA
chr3	100274401	100276600	2Kb_3911	MDKO_M_1350	2200	10.8	26.3	Down	-1.28	8.26e-08	1.37e-06	Fam46c	NM_001142952	-	100275460	100293114	Genebody	17613.5	NA	NA	NA	NA
chr16	76176001	76189000	10Kb_1119	MDKO_M_796	13000	53.69	143.12	Down	-1.41	1.26e-11	1.6e-09	0	0	0	0	0	OtherIntergenic	NA	NA	NA	NA	NA
chr16	31549401	31551600	2Kb_2354	MDKO_M_797	2200	10.49	27.54	Down	-1.39	8.16e-09	1.67e-07	0	0	0	0	0	OtherIntergenic	NA	NA	NA	NA	NA
chr16	94024301	94025300	1kb_2895	MDKO_M_798	1000	5.23	13.41	Down	-1.36	8.21e-05	0.000892623	0	0	0	0	0	OtherIntergenic	NA	NA	NA	NA	NA
chr16	72603701	72604800	1kb_2818	MDKO_M_799	1100	6.16	15.72	Down	-1.35	2.03e-05	0.000272056	0	0	0	0	0	Genedesert	NA	NA	NA	NA	NA
chr16	52017001	52020200	2Kb_2389	MDKO_M_800	3200	16.67	41.74	Down	-1.32	2.64e-08	4.91e-07	0	0	0	0	0	Genedesert	NA	NA	NA	NA	NA
chr16	90291701	90292900	1kb_2864	MDKO_M_801	1200	7.8	19.29	Down	-1.31	7.09e-06	0.00010911	0	0	0	0	0	OtherIntergenic	NA	NA	NA	NA	NA
chr16	73615001	73643000	10Kb_1116	MDKO_M_802	28000	124.9	304.8	Down	-1.29	3.28e-11	1.6e-09	0	0	0	0	0	OtherIntergenic	NA	NA	NA	NA	NA
chr15	63891001	63893800	2Kb_2120	MDKO_M_730	2800	13.23	35.17	Down	-1.41	6.2e-09	1.3e-07	Fam49b	NM_144846	-	63760649	63892009	Promoter1k	-391.5	NA	NA	NA	NA
chr16	57230001	57255000	10Kb_1110	MDKO_M_804	25000	130.55	313.15	Down	-1.26	4.13e-10	6.1e-09	0	0	0	0	0	OtherIntergenic	NA	NA	NA	NA	NA
chr16	50736801	50739800	2Kb_2387	MDKO_M_805	3000	15.88	37.44	Down	-1.24	1.91e-08	3.65e-07	0	0	0	0	0	OtherIntergenic	NA	NA	NA	NA	NA
chr16	87817201	87819200	2Kb_2442	MDKO_M_806	2000	11.31	26.19	Down	-1.21	2.19e-07	3.34e-06	0	0	0	0	0	OtherIntergenic	NA	NA	NA	NA	NA
chr16	88406001	88418000	10Kb_1128	MDKO_M_807	12000	58.05	131.92	Down	-1.18	2.1e-09	2.57e-08	0	0	0	0	0	OtherIntergenic	NA	NA	NA	NA	NA
chr16	84644001	84656000	10Kb_1122	MDKO_M_808	12000	49.41	111.06	Down	-1.17	1.31e-11	1.6e-09	0	0	0	0	0	Genedesert	NA	NA	NA	NA	NA
chr16	92967201	92969200	2Kb_2469	MDKO_M_809	2000	11.79	26.53	Down	-1.17	4.79e-06	5.63e-05	0	0	0	0	0	OtherIntergenic	NA	NA	NA	NA	NA
chr16	94044901	94045900	1kb_2896	MDKO_M_810	1000	7.78	17.51	Down	-1.17	8.61e-05	0.000924456	0	0	0	0	0	OtherIntergenic	NA	NA	NA	NA	NA
chr16	30759001	30764500	5Kb_1481	MDKO_M_811	5500	28.26	60.13	Down	-1.09	3.57e-10	7.98e-09	0	0	0	0	0	OtherIntergenic	NA	NA	NA	NA	NA
chr16	97427601	97430400	2Kb_2490	MDKO_M_812	2800	15.48	32.85	Down	-1.09	1.13e-07	1.82e-06	0	0	0	0	0	OtherIntergenic	NA	NA	NA	NA	NA
chr16	76773001	76775000	2Kb_2427	MDKO_M_813	2000	10.69	22.76	Down	-1.09	1.34e-05	0.000142255	0	0	0	0	0	OtherIntergenic	NA	NA	NA	NA	NA
chr16	92018801	92021400	2Kb_2458	MDKO_M_814	2600	14.85	31.2	Down	-1.07	1.12e-06	1.51e-05	0	0	0	0	0	OtherIntergenic	NA	NA	NA	NA	NA
chr16	55890001	55898500	5Kb_1513	MDKO_M_822	8500	37.03	89.82	Down	-1.28	5.33e-12	1.15e-09	Fam55c	NM_001134494	-	55843293	55895397	Promoter3k	1146.5	NA	NA	NA	NA
chr16	7650001	7652200	2Kb_2302	MDKO_M_816	2200	12.37	25.44	Down	-1.04	1.99e-05	0.000201091	0	0	0	0	0	OtherIntergenic	NA	NA	NA	NA	NA
chr16	22357801	22360400	2Kb_2331	MDKO_M_817	2600	16.53	33.36	Down	-1.01	1.2e-06	1.61e-05	0	0	0	0	0	OtherIntergenic	NA	NA	NA	NA	NA
chr16	84558801	84559800	1kb_2847	MDKO_M_818	1000	10.08	20.36	Down	-1.01	6.75e-05	0.000760191	0	0	0	0	0	Genedesert	NA	NA	NA	NA	NA
chr16	93416001	93418000	2Kb_2479	MDKO_M_819	2000	11.22	22.47	Down	-1	8.36e-05	0.000703372	0	0	0	0	0	OtherIntergenic	NA	NA	NA	NA	NA
chr5	30434801	30436800	2Kb_4538	MDKO_M_1614	2000	17.42	34.87	Down	-1	6.24e-05	0.000547371	Fam59b	NM_001167879	+	30431735	30444919	Genebody	4065.5	NA	NA	NA	NA
chr7	120634001	120690000	10Kb_2565	MDKO_M_1864	56000	295.46	753.08	Down	-1.35	2.86e-10	4.5e-09	Far1	NM_026143	+	120657375	120713971	Genebody	4625.5	NA	NA	NA	NA
chr9	16019001	16042000	10Kb_2813	MDKO_M_2162	23000	132.38	286.96	Down	-1.12	2.36e-09	2.87e-08	Fat3	NM_001080814	-	15714636	16182674	Genebody	152174	NA	NA	NA	NA
chr9	15971201	15973200	2Kb_6094	MDKO_M_2163	2000	11.05	23.47	Down	-1.09	1.69e-05	0.000174278	Fat3	NM_001080814	-	15714636	16182674	Genebody	210474	NA	NA	NA	NA
chr15	85051401	85053400	2Kb_2203	MDKO_M_731	2000	12.3	25.46	Down	-1.05	6.89e-05	0.000593856	Fbln1	NM_010180	+	85036437	85116723	Genebody	15963.5	NA	NA	NA	NA
chr18	58303401	58305400	2Kb_2846	MDKO_M_981	2000	11.43	24.21	Down	-1.08	2.7e-05	0.000263315	Fbn2	NM_010181	-	58168276	58369579	Genebody	65178.5	NA	NA	NA	NA
chr18	58239401	58241400	2Kb_2845	MDKO_M_982	2000	12.03	24.4	Down	-1.02	3.87e-05	0.000361337	Fbn2	NM_010181	-	58168276	58369579	Genebody	129178	NA	NA	NA	NA
chr4	45095001	45098400	2Kb_4112	MDKO_M_1475	3400	19.45	45.08	Down	-1.21	1.46e-08	2.85e-07	Fbxo10	NM_001024142	-	45047120	45097475	Promoter1k	774.5	NA	NA	NA	NA
chr11	16851601	16853600	2Kb_786	MDKO_M_344	2000	9.41	25.57	Down	-1.44	5.89e-08	1.01e-06	Fbxo48	NM_176982	+	16851412	16854774	Promoter3k	1188.5	NA	NA	NA	NA
chr1	172901801	172902800	1kb_440	MDKO_M_85	1000	3.49	14.03	Down	-2.01	1.7e-07	3.91e-06	Fcgr2b	NM_001077189	-	172890688	172906201	Genebody	3900.5	NA	NA	NA	NA
chr1	172892101	172893200	1kb_439	MDKO_M_86	1100	5.81	14.69	Down	-1.34	2.77e-05	0.00035626	Fcgr2b	NM_001077189	-	172890688	172906201	Genebody	13550.5	NA	NA	NA	NA
chr7	137406101	137407200	1kb_6498	MDKO_M_1880	1100	6.33	15.98	Down	-1.33	3.03e-05	0.000386466	Fgfr2	NM_010207	-	137305964	137410321	Genebody	3670.5	NA	NA	NA	NA
chr14	10406001	10452000	10Kb_830	MDKO_M_653	46000	207.64	502.06	Down	-1.27	1.61e-10	2.86e-09	Fhit	NM_010210	-	10382607	11994545	Genebody	1.56554e+06	NA	NA	NA	NA
chr14	10469001	10482000	10Kb_831	MDKO_M_654	13000	58.48	129.77	Down	-1.15	1.05e-11	1.6e-09	Fhit	NM_010210	-	10382607	11994545	Genebody	1.51904e+06	NA	NA	NA	NA
chr4	124376801	124380200	2Kb_4350	MDKO_M_1476	3400	10.89	43	Down	-1.98	3.57e-13	5e-10	Fhl3	NM_010213	+	124377942	124385853	Promoter1k	558.5	NA	NA	NA	NA
chr2	52713501	52719500	5Kb_2086	MDKO_M_1177	6000	35.56	71.8	Down	-1.01	1.17e-07	1.54e-06	Fmnl2	NM_172409	+	52716901	52993235	Promoter1k	-400.5	NA	NA	NA	NA
chr15	99190001	99210000	10Kb_1034	MDKO_M_732	20000	109.22	232.13	Down	-1.09	7.78e-11	1.82e-09	Fmnl3	NM_011711	-	99147653	99200896	Promoter1k	895.5	NA	NA	NA	NA
chr1	164887201	164889200	2Kb_359	MDKO_M_87	2000	5.76	27.29	Down	-2.24	1.19e-09	3.02e-08	Fmo3	NM_008030	-	164883930	164914621	Genebody	26420.5	NA	NA	NA	NA
chr1	164906001	164918000	10Kb_162	MDKO_M_88	12000	32.15	109.28	Down	-1.77	1.08e-11	1.6e-09	Fmo3	NM_008030	-	164883930	164914621	Promoter3k	2620.5	NA	NA	NA	NA
chr1	164884401	164885400	1kb_414	MDKO_M_89	1000	4.9	14.88	Down	-1.6	2.19e-05	0.000291687	Fmo3	NM_008030	-	164883930	164914621	Genebody	29720.5	NA	NA	NA	NA
chr3	27497001	27515000	10Kb_1746	MDKO_M_1351	18000	57.23	190.96	Down	-1.74	7.56e-11	1.8e-09	Fndc3b	NM_173182	-	27315083	27609360	Genebody	103360	NA	NA	NA	NA
chr12	86815201	86817800	2Kb_1466	MDKO_M_470	2600	16.01	35.32	Down	-1.14	1.48e-06	1.95e-05	Fos	NM_010234	+	86814850	86818218	Promoter3k	1650.5	NA	NA	NA	NA
chr17	56124901	56126000	1kb_3070	MDKO_M_892	1100	7.83	18.07	Down	-1.21	3.33e-05	0.000418345	Fsd1	NM_183178	+	56125933	56136303	Promoter1k	-482.5	NA	NA	NA	NA
chr15	6573401	6576400	2Kb_2039	MDKO_M_733	3000	12.38	31.2	Down	-1.33	2.19e-08	4.13e-07	Fyb	NM_011815	+	6529870	6613311	Genebody	45030.5	NA	NA	NA	NA
chr7	104229001	104234000	5Kb_3416	MDKO_M_1850	5000	18.01	57.48	Down	-1.67	9.39e-13	1.15e-09	Gab2	NM_010248	+	104230260	104457460	Promoter3k	1240.5	NA	NA	NA	NA
chr16	30386001	30391000	5Kb_1479	MDKO_M_845	5000	51.47	14.66	Up	1.81	1.03e-12	1.15e-09	Atp13a3	NM_001128096	-	30312509	30388615	ProximalPromoter	114.5	NA	NA	NA	NA
chr16	31422001	31437000	10Kb_1084	MDKO_M_846	15000	145.67	55.53	Up	1.39	5.85e-11	1.65e-09	Bdh1	NM_001122683	+	31428838	31458986	Promoter1k	662.5	NA	NA	NA	NA
chr16	20725001	20743000	10Kb_1074	MDKO_M_847	18000	220.25	91.9	Up	1.26	2.59e-10	4.14e-09	Chrd	NM_009893	+	20733199	20742456	Promoter1k	801.5	NA	NA	NA	NA
chr16	20714801	20715800	1kb_2723	MDKO_M_848	1000	12.89	1.72	Up	2.9	1.79e-10	9.47e-09	Clcn2	NM_009900	-	20703038	20716708	Promoter3k	1407.5	NA	NA	NA	NA
chr16	78295001	78307000	10Kb_1121	MDKO_M_849	12000	120.49	44.69	Up	1.43	1.72e-11	1.6e-09	Cxadr	NM_001025192	+	78301935	78340995	Promoter1k	-934.5	NA	NA	NA	NA
chr16	38896001	38916000	10Kb_1101	MDKO_M_850	20000	211.53	94.14	Up	1.17	5.39e-11	1.63e-09	Igsf11	NM_170599	+	38902457	39027269	Genebody	3543.5	NA	NA	NA	NA
chr16	16211001	16218500	5Kb_1462	MDKO_M_851	7500	79.17	30.11	Up	1.39	7.94e-12	1.15e-09	Pkp2	NM_026163	+	16213437	16272804	Promoter3k	1313.5	NA	NA	NA	NA
chr16	97977001	97994000	10Kb_1144	MDKO_M_852	17000	164.92	73.16	Up	1.17	1.32e-10	2.49e-09	Ripk4	NM_023663	-	97963548	97985361	ProximalPromoter	-139.5	NA	NA	NA	NA
chr16	34091001	34098500	5Kb_1486	MDKO_M_853	7500	76.69	32.08	Up	1.26	7.25e-12	1.15e-09	0	0	0	0	0	OtherIntergenic	NA	NA	NA	NA	NA
chr16	11258101	11259100	1kb_2700	MDKO_M_854	1000	12.83	3.98	Up	1.69	1.84e-05	0.000250311	0	0	0	0	0	OtherIntergenic	NA	NA	NA	NA	NA
chr17	42892601	42893600	1kb_3022	MDKO_M_855	1000	1.67	13.76	Down	-3.04	1.18e-08	3.53e-07	0	0	0	0	0	OtherIntergenic	NA	NA	NA	NA	NA
chr7	104445601	104448200	2Kb_5492	MDKO_M_1851	2600	15.62	31.27	Down	-1	1.38e-06	1.83e-05	Gab2	NM_010248	+	104230260	104457460	Genebody	216640	NA	NA	NA	NA
chr17	76192301	76193800	1kb_3113	MDKO_M_857	1500	5.41	21.02	Down	-1.96	2.67e-08	7.34e-07	0	0	0	0	0	OtherIntergenic	NA	NA	NA	NA	NA
chr17	76179301	76180300	1kb_3112	MDKO_M_858	1000	3.79	14.22	Down	-1.91	4.24e-07	8.97e-06	0	0	0	0	0	OtherIntergenic	NA	NA	NA	NA	NA
chr17	36618501	36620700	1kb_3014	MDKO_M_859	2200	9.39	34.22	Down	-1.87	1.11e-10	6.32e-09	0	0	0	0	0	OtherIntergenic	NA	NA	NA	NA	NA
chr17	42886801	42888800	2Kb_2601	MDKO_M_860	2000	8.24	29.85	Down	-1.86	2.14e-10	6.87e-09	0	0	0	0	0	OtherIntergenic	NA	NA	NA	NA	NA
chr17	76171201	76174000	2Kb_2687	MDKO_M_861	2800	10.39	33.47	Down	-1.69	3.73e-12	5.79e-10	0	0	0	0	0	OtherIntergenic	NA	NA	NA	NA	NA
chr17	36389201	36390300	1kb_3012	MDKO_M_862	1100	5.44	16.18	Down	-1.57	4.52e-06	7.33e-05	0	0	0	0	0	OtherIntergenic	NA	NA	NA	NA	NA
chr11	41813001	41814100	1kb_971	MDKO_M_345	1100	5.88	14.38	Down	-1.29	7.52e-05	0.000829996	Gabrg2	NM_008073	-	41725358	41814179	Promoter1k	628.5	NA	NA	NA	NA
chr17	81414101	81415100	1kb_3129	MDKO_M_864	1000	5.22	14.65	Down	-1.49	2.87e-05	0.000368093	0	0	0	0	0	OtherIntergenic	NA	NA	NA	NA	NA
chr17	64211601	64212700	1kb_3082	MDKO_M_865	1100	5.94	16.02	Down	-1.43	1.99e-06	3.54e-05	0	0	0	0	0	OtherIntergenic	NA	NA	NA	NA	NA
chr17	57409501	57415000	5Kb_1672	MDKO_M_866	5500	25.26	67.04	Down	-1.41	2.62e-10	6.15e-09	0	0	0	0	0	OtherIntergenic	NA	NA	NA	NA	NA
chr17	12831901	12833000	1kb_2925	MDKO_M_867	1100	6.73	17.76	Down	-1.4	7.7e-06	0.000117137	0	0	0	0	0	OtherIntergenic	NA	NA	NA	NA	NA
chr17	15792801	15795200	2Kb_2531	MDKO_M_868	2400	10.53	26.61	Down	-1.34	1.2e-08	2.38e-07	0	0	0	0	0	OtherIntergenic	NA	NA	NA	NA	NA
chr17	87927501	87935000	5Kb_1718	MDKO_M_869	7500	29.44	73.7	Down	-1.32	6.4e-11	2.09e-09	0	0	0	0	0	OtherIntergenic	NA	NA	NA	NA	NA
chr17	36452101	36453100	1kb_3013	MDKO_M_870	1000	6.51	15.74	Down	-1.27	5.37e-05	0.000629335	0	0	0	0	0	OtherIntergenic	NA	NA	NA	NA	NA
chr17	76105001	76107400	2Kb_2686	MDKO_M_871	2400	13.09	31.05	Down	-1.25	2.49e-07	3.77e-06	0	0	0	0	0	OtherIntergenic	NA	NA	NA	NA	NA
chr17	45280001	45282800	2Kb_2630	MDKO_M_872	2800	13.77	32.24	Down	-1.23	1.05e-08	2.1e-07	0	0	0	0	0	OtherIntergenic	NA	NA	NA	NA	NA
chr17	29492601	29495000	2Kb_2562	MDKO_M_873	2400	13.51	31.76	Down	-1.23	2.22e-07	3.39e-06	0	0	0	0	0	OtherIntergenic	NA	NA	NA	NA	NA
chr17	76208401	76210600	2Kb_2689	MDKO_M_874	2200	12.33	28.54	Down	-1.21	7.01e-08	1.18e-06	0	0	0	0	0	OtherIntergenic	NA	NA	NA	NA	NA
chr17	84261401	84263600	2Kb_2707	MDKO_M_875	2200	12.41	28.34	Down	-1.19	4.76e-07	6.87e-06	0	0	0	0	0	OtherIntergenic	NA	NA	NA	NA	NA
chr17	76255001	76298000	10Kb_1230	MDKO_M_876	43000	257.54	581.57	Down	-1.18	5.45e-10	7.71e-09	0	0	0	0	0	OtherIntergenic	NA	NA	NA	NA	NA
chr17	43465001	43470000	5Kb_1640	MDKO_M_877	5000	23.28	52.12	Down	-1.16	6.95e-11	2.21e-09	0	0	0	0	0	OtherIntergenic	NA	NA	NA	NA	NA
chr17	56692601	56694800	2Kb_2655	MDKO_M_878	2200	14.83	32.55	Down	-1.13	2.73e-06	3.4e-05	0	0	0	0	0	OtherIntergenic	NA	NA	NA	NA	NA
chr17	42839001	42840000	1kb_3020	MDKO_M_879	1000	7.11	15.59	Down	-1.13	7.76e-05	0.000851519	0	0	0	0	0	OtherIntergenic	NA	NA	NA	NA	NA
chr17	8555801	8556800	1kb_2914	MDKO_M_880	1000	8.8	19.05	Down	-1.12	7.6e-05	0.000838015	0	0	0	0	0	OtherIntergenic	NA	NA	NA	NA	NA
chr17	15445001	15512000	10Kb_1157	MDKO_M_881	67000	480.76	1037.86	Down	-1.11	1.24e-08	1.33e-07						OtherIntergenic	NA	NA	NA	NA	NA
chr17	43327001	43329400	2Kb_2604	MDKO_M_882	2400	16.4	35.06	Down	-1.1	2.53e-07	3.82e-06	0	0	0	0	0	OtherIntergenic	NA	NA	NA	NA	NA
chr17	81564001	81586000	10Kb_1236	MDKO_M_883	22000	104.82	220.96	Down	-1.08	3.78e-11	1.6e-09	0	0	0	0	0	OtherIntergenic	NA	NA	NA	NA	NA
chr17	87334801	87337200	2Kb_2722	MDKO_M_884	2400	14.96	31.62	Down	-1.08	1.87e-05	0.000190851	0	0	0	0	0	OtherIntergenic	NA	NA	NA	NA	NA
chr17	15672301	15673600	1kb_2952	MDKO_M_885	1300	13.88	29.35	Down	-1.08	1.54e-05	0.000215116	0	0	0	0	0	OtherIntergenic	NA	NA	NA	NA	NA
chr17	15785801	15787800	2Kb_2530	MDKO_M_886	2000	11.41	23.45	Down	-1.04	2.22e-05	0.000221958	0	0	0	0	0	OtherIntergenic	NA	NA	NA	NA	NA
chr17	54202601	54204600	2Kb_2649	MDKO_M_887	2000	13.02	26.33	Down	-1.02	4.15e-05	0.000383893	0	0	0	0	0	OtherIntergenic	NA	NA	NA	NA	NA
chr17	42882201	42884200	2Kb_2600	MDKO_M_888	2000	12.51	25.28	Down	-1.02	9.48e-05	0.000782441	0	0	0	0	0	OtherIntergenic	NA	NA	NA	NA	NA
chr2	54398001	54421000	10Kb_1537	MDKO_M_1178	23000	80.59	269.55	Down	-1.74	1.05e-10	2.14e-09	Galnt13	NM_173030	+	54288797	54970154	Genebody	120704	NA	NA	NA	NA
chr2	54380001	54395000	10Kb_1536	MDKO_M_1179	15000	60.57	149.45	Down	-1.3	2.38e-10	3.84e-09	Galnt13	NM_173030	+	54288797	54970154	Genebody	98703.5	NA	NA	NA	NA
chr3	142272001	142307000	10Kb_1862	MDKO_M_1352	35000	190.14	383.35	Down	-1.01	1.01e-10	2.09e-09	Gbp2	NM_010260	+	142283626	142300971	Genebody	5874.5	NA	NA	NA	NA
chr3	142221001	142235000	10Kb_1861	MDKO_M_1353	14000	52.54	146.64	Down	-1.48	2.25e-11	1.6e-09	Gbp3	NM_018734	+	142223015	142236175	Genebody	4985.5	NA	NA	NA	NA
chr3	142151501	142175500	5Kb_2503	MDKO_M_1354	24000	125.14	357.92	Down	-1.52	1.47e-10	3.83e-09	Gbp5	NM_153564	+	142159897	142185307	Genebody	3603.5	NA	NA	NA	NA
chr3	142212601	142214600	2Kb_3998	MDKO_M_1355	2000	10.02	26.26	Down	-1.39	4.18e-06	4.98e-05	Gbp6	NM_145545	+	142193305	142213046	Genebody	20295.5	NA	NA	NA	NA
chr10	75052401	75053500	1kb_685	MDKO_M_252	1100	5.53	14.61	Down	-1.4	1.4e-05	0.000197859	Ggt5	NM_011820	+	75052125	75079712	Promoter1k	825.5	NA	NA	NA	NA
chr2	35299101	35300400	1kb_3820	MDKO_M_1180	1300	6.35	16.5	Down	-1.38	2.3e-05	0.000304348	Ggta1	NM_010283	-	35255699	35316944	Genebody	17193.5	NA	NA	NA	NA
chr8	86182001	86195000	10Kb_2713	MDKO_M_2054	13000	57.46	136.93	Down	-1.25	1.42e-11	1.6e-09	Gipc1	NM_018771	+	86176576	86188687	Genebody	11924.5	NA	NA	NA	NA
chr9	96007001	96056000	10Kb_2951	MDKO_M_2164	49000	287.36	648.51	Down	-1.17	3.58e-09	4.18e-08	Gk5	NM_177352	+	96019847	96083371	Genebody	11653.5	NA	NA	NA	NA
chr9	96065001	96086000	10Kb_2952	MDKO_M_2165	21000	107.05	217.44	Down	-1.02	7.83e-11	1.82e-09	Gk5	NM_177352	+	96019847	96083371	Genebody	55653.5	NA	NA	NA	NA
chr1	120831501	120832600	1kb_239	MDKO_M_90	1100	4.73	16.04	Down	-1.76	3.75e-07	8.04e-06	Gli2	NM_001081125	-	120730637	120950195	Genebody	118144	NA	NA	NA	NA
chr1	120892601	120894800	2Kb_221	MDKO_M_91	2200	12.35	25.39	Down	-1.04	6.3e-06	7.21e-05	Gli2	NM_001081125	-	120730637	120950195	Genebody	56494.5	NA	NA	NA	NA
chr16	4585001	4604000	10Kb_1056	MDKO_M_823	19000	89.09	205.72	Down	-1.21	3.27e-11	1.6e-09	Glis2	NM_031184	+	4594712	4615956	ProximalPromoter	-211.5	NA	NA	NA	NA
chr19	28584001	28608000	10Kb_1384	MDKO_M_1063	24000	126.82	289.4	Down	-1.19	7.33e-11	1.8e-09	Glis3	NM_175459	-	28336937	28754566	Genebody	158566	NA	NA	NA	NA
chr1	52284501	52292500	5Kb_45	MDKO_M_92	8000	33.85	91.95	Down	-1.44	4.47e-12	1.15e-09	Gls	NM_001113383	-	52242124	52290075	Promoter3k	1574.5	NA	NA	NA	NA
chr1	52226001	52229800	2Kb_76	MDKO_M_93	3800	21.19	46.66	Down	-1.14	2.69e-10	8.31e-09	Gls	NM_001081081	-	52220293	52290075	Genebody	62174.5	NA	NA	NA	NA
chr6	128426601	128428800	2Kb_5223	MDKO_M_1736	2200	13.37	29.02	Down	-1.12	4.7e-07	6.79e-06	Gm10069	NR_028593	+	128388774	128453297	Genebody	38926.5	NA	NA	NA	NA
chr2	128203001	128220000	10Kb_1628	MDKO_M_1181	17000	79.48	184.04	Down	-1.21	1.58e-08	1.66e-07	Gm14005	NR_028591	-	128197845	128255086	Genebody	43585.5	NA	NA	NA	NA
chr11	88821001	88839000	10Kb_485	MDKO_M_346	18000	54.03	176.98	Down	-1.71	2.41e-11	1.6e-09	Gm15698	NR_003564	-	88825980	88828230	Promoter3k	-1770.5	NA	NA	NA	NA
chr10	33489401	33492200	2Kb_518	MDKO_M_253	2800	12.73	35.06	Down	-1.46	2.62e-10	8.16e-09	Gm4794	NM_001101452	-	33486229	33501920	Genebody	11119.5	NA	NA	NA	NA
chr3	137715201	137716200	1kb_4586	MDKO_M_1356	1000	6.41	14.83	Down	-1.21	8.79e-05	0.000939663	Gm5105	NM_177860	-	137711724	137730351	Genebody	14650.5	NA	NA	NA	NA
chr4	155106001	155111000	5Kb_2801	MDKO_M_1477	5000	15.9	57.29	Down	-1.85	1.05e-12	1.15e-09	Gm5151	NM_001101506	+	155108912	155114672	Promoter1k	-411.5	NA	NA	NA	NA
chr16	26985401	26986500	1kb_2739	MDKO_M_824	1100	4.35	13.54	Down	-1.64	4.37e-06	7.11e-05	Gm606	NM_001013761	-	26957320	26990059	Genebody	4108.5	NA	NA	NA	NA
chr16	26967701	26968800	1kb_2738	MDKO_M_825	1100	9.43	21.47	Down	-1.19	7.66e-06	0.000116695	Gm606	NM_001013761	-	26957320	26990059	Genebody	21808.5	NA	NA	NA	NA
chr7	14822801	14826200	2Kb_5275	MDKO_M_1789	3400	9.6	42.27	Down	-2.14	3.98e-13	5e-10	Gm6957	NM_001081325	-	14807825	14840181	Genebody	15680.5	NA	NA	NA	NA
chr12	77518801	77519800	1kb_1645	MDKO_M_471	1000	11.5	23.65	Down	-1.04	3.86e-05	0.00047453	Gm70	NM_001163103	+	77518585	77540477	Promoter1k	715.5	NA	NA	NA	NA
chr11	106610001	106624000	10Kb_544	MDKO_M_347	14000	52.73	166.1	Down	-1.66	1.06e-10	2.16e-09	Gm885	NM_001033435	+	106612581	106628881	Genebody	4419.5	NA	NA	NA	NA
chr10	80980001	80990000	10Kb_282	MDKO_M_254	10000	52.85	106.77	Down	-1.01	1.19e-11	1.6e-09	Gna15	NM_010304	-	80965058	80986969	Promoter3k	1968.5	NA	NA	NA	NA
chr14	20796101	20797100	1kb_2138	MDKO_M_655	1000	9.19	18.87	Down	-1.04	6.62e-05	0.000748685	Gng2	NM_010315	-	20691780	20796470	ProximalPromoter	-130.5	NA	NA	NA	NA
chr17	24959001	24977000	10Kb_1165	MDKO_M_919	18000	171.83	79.57	Up	1.11	5.02e-10	7.18e-09	4930528F23Rik	NM_029197	+	24941326	24976731	Genebody	26674.5	NA	NA	NA	NA
chr17	85067001	85078000	10Kb_1240	MDKO_M_920	11000	112.08	46.92	Up	1.26	2.22e-11	1.6e-09	Abcg5	NM_031884	-	85057573	85082262	Genebody	9761.5	NA	NA	NA	NA
chr17	85090401	85091400	1kb_3145	MDKO_M_921	1000	12.22	2.59	Up	2.24	1.05e-07	2.52e-06	Abcg8	NM_026180	+	85082470	85099672	Genebody	8430.5	NA	NA	NA	NA
chr17	31771801	31774200	2Kb_2574	MDKO_M_923	2400	41.32	12.54	Up	1.72	8.32e-13	5e-10	Cbs	NM_178224	-	31749588	31774075	Promoter3k	1074.5	NA	NA	NA	NA
chr17	57198001	57206000	5Kb_1669	MDKO_M_924	8000	91.7	33.36	Up	1.46	8.55e-09	1.39e-07	Crb3	NM_177638	+	57201699	57205336	Promoter1k	301.5	NA	NA	NA	NA
chr17	15530201	15532800	2Kb_2528	MDKO_M_926	2600	29.11	6.26	Up	2.22	7.08e-12	7.14e-10	Fam120b	NM_024203	+	15533209	15570544	Promoter3k	-1708.5	NA	NA	NA	NA
chr17	24338001	24354000	10Kb_1162	MDKO_M_929	16000	173.91	60.34	Up	1.53	7.95e-09	8.76e-08	Ntn3	NM_010947	-	24340790	24346331	Promoter1k	330.5	NA	NA	NA	NA
chr17	31569801	31571800	2Kb_2573	MDKO_M_930	2000	24.59	12.07	Up	1.03	3.5e-05	0.000332047	Pde9a	NM_001163748	+	31523178	31613253	Genebody	47622.5	NA	NA	NA	NA
chr17	31520001	31528000	5Kb_1616	MDKO_M_931	8000	91.06	30.43	Up	1.58	5.57e-11	1.93e-09	Pde9a	NM_001163748	+	31523178	31613253	Promoter1k	822.5	NA	NA	NA	NA
chr17	56255701	56257100	1kb_3071	MDKO_M_932	1400	22.97	4.97	Up	2.21	7.18e-13	4.44e-10	Plin5	NM_001077348	-	56251023	56256720	Promoter1k	319.5	NA	NA	NA	NA
chr17	12853701	12854800	1kb_2926	MDKO_M_933	1100	13.28	3.88	Up	1.77	3.72e-06	6.19e-05	Slc22a1	NM_009202	-	12841740	12868703	Genebody	14452.5	NA	NA	NA	NA
chr17	28825001	28827400	2Kb_2556	MDKO_M_934	2400	29.08	11.8	Up	1.3	1.34e-06	1.78e-05	Slc26a8	NM_146076	-	28786610	28826931	Promoter1k	730.5	NA	NA	NA	NA
chr17	26805501	26810500	5Kb_1600	MDKO_M_935	5000	52.43	25.1	Up	1.06	4.91e-09	8.38e-08	0	0	0	0	0	OtherIntergenic	NA	NA	NA	NA	NA
chr17	46003001	46019000	10Kb_1206	MDKO_M_936	16000	156.32	72.7	Up	1.1	3.32e-11	1.6e-09	0	0	0	0	0	OtherIntergenic	NA	NA	NA	NA	NA
chr17	25507801	25509800	2Kb_2540	MDKO_M_937	2000	25.63	12.35	Up	1.05	4.58e-05	0.000419113	Tpsg1	NM_012034	+	25507497	25511384	Promoter3k	1303.5	NA	NA	NA	NA
chr17	88341501	88342500	1kb_3170	MDKO_M_938	1000	12.74	4.55	Up	1.49	8.21e-05	0.000892623	0	0	0	0	0	OtherIntergenic	NA	NA	NA	NA	NA
chr17	46563001	46606000	10Kb_1208	MDKO_M_939	43000	521.11	250.02	Up	1.06	1.16e-09	1.51e-08	Ttbk1	NM_001162864	-	46579396	46624623	Genebody	40122.5	NA	NA	NA	NA
chr17	85271001	85281000	10Kb_1241	MDKO_M_940	10000	94.67	26.84	Up	1.82	4.72e-12	1.6e-09	0	0	0	0	0	OtherIntergenic	NA	NA	NA	NA	NA
chr18	58439401	58444400	2Kb_2852	MDKO_M_941	5000	17.01	60.1	Down	-1.82	2.65e-12	5.34e-10	0	0	0	0	0	OtherIntergenic	NA	NA	NA	NA	NA
chr18	58482401	58486000	2Kb_2857	MDKO_M_942	3600	13.05	41.45	Down	-1.67	3.47e-11	1.65e-09	0	0	0	0	0	OtherIntergenic	NA	NA	NA	NA	NA
chr18	58447001	58472000	10Kb_1302	MDKO_M_943	25000	92.02	290.79	Down	-1.66	5.84e-11	1.65e-09	0	0	0	0	0	OtherIntergenic	NA	NA	NA	NA	NA
chr18	58474401	58477400	2Kb_2856	MDKO_M_944	3000	13.17	41.43	Down	-1.65	3.97e-09	8.77e-08	0	0	0	0	0	OtherIntergenic	NA	NA	NA	NA	NA
chr18	61340401	61341500	1kb_3328	MDKO_M_945	1100	5.65	16.24	Down	-1.52	9.51e-07	1.84e-05	0	0	0	0	0	OtherIntergenic	NA	NA	NA	NA	NA
chr18	61255601	61259000	2Kb_2864	MDKO_M_946	3400	16.67	44.31	Down	-1.41	3.79e-12	5.79e-10	0	0	0	0	0	OtherIntergenic	NA	NA	NA	NA	NA
chr13	59773001	59780000	5Kb_1069	MDKO_M_556	7000	26.99	63.04	Down	-1.22	4.59e-12	1.15e-09	Golm1	NM_027307	-	59736356	59777144	Promoter1k	643.5	NA	NA	NA	NA
chr18	58424001	58429000	5Kb_1793	MDKO_M_948	5000	19.72	50.45	Down	-1.36	3.05e-12	1.15e-09	0	0	0	0	0	OtherIntergenic	NA	NA	NA	NA	NA
chr18	30940001	30941000	1kb_3211	MDKO_M_949	1000	5.7	14.55	Down	-1.35	5.08e-05	0.000599802	0	0	0	0	0	OtherIntergenic	NA	NA	NA	NA	NA
chr18	47619601	47621600	2Kb_2821	MDKO_M_950	2000	9.51	23.84	Down	-1.33	1.03e-07	1.68e-06	0	0	0	0	0	OtherIntergenic	NA	NA	NA	NA	NA
chr18	47623001	47677000	10Kb_1295	MDKO_M_951	54000	265.52	660.95	Down	-1.32	2.97e-10	4.63e-09	0	0	0	0	0	OtherIntergenic	NA	NA	NA	NA	NA
chr18	76992101	76993600	1kb_3401	MDKO_M_952	1500	7.63	19.04	Down	-1.32	2.81e-06	4.84e-05	0	0	0	0	0	OtherIntergenic	NA	NA	NA	NA	NA
chr18	11648401	11649700	1kb_3180	MDKO_M_953	1300	6.66	16.65	Down	-1.32	1.58e-05	0.000218913	0	0	0	0	0	OtherIntergenic	NA	NA	NA	NA	NA
chr18	47578001	47614000	10Kb_1294	MDKO_M_954	36000	194.28	478.3	Down	-1.3	1.84e-09	2.28e-08	0	0	0	0	0	OtherIntergenic	NA	NA	NA	NA	NA
chr18	81354301	81355300	1kb_3424	MDKO_M_955	1000	5.97	14.6	Down	-1.29	6.06e-05	0.000696398	0	0	0	0	0	Genedesert	NA	NA	NA	NA	NA
chr18	32744201	32746200	2Kb_2760	MDKO_M_956	2000	11.39	27.7	Down	-1.28	3.52e-08	6.36e-07	0	0	0	0	0	OtherIntergenic	NA	NA	NA	NA	NA
chr18	11650801	11652800	2Kb_2737	MDKO_M_957	2000	9.48	22.98	Down	-1.28	2.33e-07	3.54e-06	0	0	0	0	0	OtherIntergenic	NA	NA	NA	NA	NA
chr18	11952001	11957500	5Kb_1727	MDKO_M_958	5500	24.64	58.96	Down	-1.26	3.34e-10	7.52e-09	0	0	0	0	0	OtherIntergenic	NA	NA	NA	NA	NA
chr18	58990401	58991600	1kb_3322	MDKO_M_959	1200	6.68	15.87	Down	-1.25	2.03e-05	0.000272056	0	0	0	0	0	OtherIntergenic	NA	NA	NA	NA	NA
chr18	73989001	74033000	10Kb_1324	MDKO_M_960	44000	262.2	620.54	Down	-1.24	2.19e-10	3.6e-09	0	0	0	0	0	OtherIntergenic	NA	NA	NA	NA	NA
chr18	58492001	58520000	10Kb_1303	MDKO_M_961	28000	133.79	314.58	Down	-1.23	6.1e-11	1.67e-09	0	0	0	0	0	OtherIntergenic	NA	NA	NA	NA	NA
chr18	47564601	47566600	2Kb_2815	MDKO_M_962	2000	10.99	25.45	Down	-1.21	1.09e-05	0.000117855	0	0	0	0	0	OtherIntergenic	NA	NA	NA	NA	NA
chr18	28861001	28872000	10Kb_1266	MDKO_M_963	11000	46.68	107.37	Down	-1.2	3.99e-12	1.6e-09	0	0	0	0	0	Genedesert	NA	NA	NA	NA	NA
chr18	64202001	64204000	2Kb_2880	MDKO_M_964	2000	10.99	24.42	Down	-1.15	4.91e-06	5.74e-05	0	0	0	0	0	OtherIntergenic	NA	NA	NA	NA	NA
chr14	118338801	118340200	1kb_2325	MDKO_M_656	1400	6.14	19.64	Down	-1.68	3.22e-08	8.66e-07	Gpc6	NM_011821	+	117324536	118378750	Genebody	1.01496e+06	NA	NA	NA	NA
chr14	118342801	118345000	2Kb_2008	MDKO_M_657	2200	11.57	29.52	Down	-1.35	1.72e-07	2.69e-06	Gpc6	NM_011821	+	117324536	118378750	Genebody	1.01936e+06	NA	NA	NA	NA
chr18	47765601	47767600	2Kb_2828	MDKO_M_967	2000	11.09	24.5	Down	-1.14	1.09e-05	0.000118204	0	0	0	0	0	OtherIntergenic	NA	NA	NA	NA	NA
chr18	24282801	24285000	2Kb_2753	MDKO_M_968	2200	12.73	27.85	Down	-1.13	3.41e-05	0.000324029	0	0	0	0	0	OtherIntergenic	NA	NA	NA	NA	NA
chr18	30901001	30936000	10Kb_1268	MDKO_M_969	35000	201.63	436.71	Down	-1.11	8.5e-11	1.9e-09	0	0	0	0	0	OtherIntergenic	NA	NA	NA	NA	NA
chr18	55295801	55298400	2Kb_2840	MDKO_M_970	2600	15.83	34.27	Down	-1.11	2.27e-07	3.46e-06	0	0	0	0	0	Genedesert	NA	NA	NA	NA	NA
chr18	54611201	54613800	2Kb_2837	MDKO_M_971	2600	15.48	32.22	Down	-1.06	6.03e-06	6.94e-05	0	0	0	0	0	OtherIntergenic	NA	NA	NA	NA	NA
chr18	68632401	68635000	2Kb_2893	MDKO_M_972	2600	13.17	27.5	Down	-1.06	8.07e-05	0.000681489	0	0	0	0	0	OtherIntergenic	NA	NA	NA	NA	NA
chr18	47715401	47717600	2Kb_2827	MDKO_M_973	2200	14.15	28.84	Down	-1.03	5.01e-05	0.000454028	0	0	0	0	0	OtherIntergenic	NA	NA	NA	NA	NA
chr18	64157201	64159200	2Kb_2878	MDKO_M_974	2000	11.86	24.26	Down	-1.03	2.41e-05	0.000239559	0	0	0	0	0	OtherIntergenic	NA	NA	NA	NA	NA
chr18	37443601	37445800	2Kb_2777	MDKO_M_975	2200	12.35	25.01	Down	-1.02	9.25e-06	0.000101834	0	0	0	0	0	OtherIntergenic	NA	NA	NA	NA	NA
chr18	57906601	57908600	2Kb_2844	MDKO_M_976	2000	11.47	23.34	Down	-1.02	6.23e-05	0.00054655	0	0	0	0	0	OtherIntergenic	NA	NA	NA	NA	NA
chr18	62365001	62375000	10Kb_1311	MDKO_M_977	10000	55.69	112.33	Down	-1.01	8.12e-09	8.93e-08	0	0	0	0	0	OtherIntergenic	NA	NA	NA	NA	NA
chr18	80147201	80149600	2Kb_2934	MDKO_M_978	2400	13.67	27.26	Down	-1	5.25e-05	0.000472681	0	0	0	0	0	OtherIntergenic	NA	NA	NA	NA	NA
chr17	42878001	42880200	2Kb_2599	MDKO_M_893	2200	11.01	27.46	Down	-1.32	1.75e-08	3.37e-07	Gpr111	NM_001033493	-	42845885	42879127	ProximalPromoter	26.5	NA	NA	NA	NA
chr16	37943201	37945200	2Kb_2372	MDKO_M_826	2000	12.52	26.29	Down	-1.07	6.13e-06	7.03e-05	Gpr156	NM_153394	+	37916581	38007614	Genebody	27619.5	NA	NA	NA	NA
chr16	37936501	37941500	5Kb_1500	MDKO_M_827	5000	26.49	53	Down	-1	3.85e-08	5.51e-07	Gpr156	NM_153394	+	37916581	38007614	Genebody	22419.5	NA	NA	NA	NA
chr3	30755401	30757400	2Kb_3758	MDKO_M_1357	2000	11.99	26.63	Down	-1.15	5.06e-06	5.91e-05	Gpr160	NM_027965	+	30754871	30796113	Promoter3k	1529.5	NA	NA	NA	NA
chr15	101044001	101067000	10Kb_1040	MDKO_M_734	23000	152.88	311.42	Down	-1.03	6.81e-11	1.74e-09	Grasp	NM_019518	+	101054637	101063186	Promoter1k	863.5	NA	NA	NA	NA
chr18	10416801	10418800	2Kb_2733	MDKO_M_983	2000	11.53	26.38	Down	-1.19	1.21e-05	0.000129184	Greb1l	NM_001083628	+	10325176	10562938	Genebody	92624.5	NA	NA	NA	NA
chr18	10438001	10455000	10Kb_1255	MDKO_M_984	17000	74.41	151.24	Down	-1.02	1.21e-11	1.6e-09	Greb1l	NM_001083628	+	10325176	10562938	Genebody	121324	NA	NA	NA	NA
chr6	63495001	63507000	10Kb_2342	MDKO_M_1737	12000	36.56	124.09	Down	-1.76	1.34e-11	1.6e-09	Grid2	NM_008167	+	63206850	64616272	Genebody	294150	NA	NA	NA	NA
chr16	88247201	88249200	2Kb_2443	MDKO_M_828	2000	10.03	22.44	Down	-1.16	1.59e-06	2.08e-05	Grik1	NM_010348	-	87896141	88290502	Genebody	42301.5	NA	NA	NA	NA
chr9	42507801	42510000	2Kb_6184	MDKO_M_2166	2200	13.83	28.16	Down	-1.03	5.85e-05	0.000517805	Grik4	NM_175481	-	42328518	42752453	Genebody	243552	NA	NA	NA	NA
chr16	9921701	9923000	1kb_2695	MDKO_M_829	1300	6.23	19.72	Down	-1.66	2.52e-07	5.61e-06	Grin2a	NM_008170	-	9577802	9992625	Genebody	70274.5	NA	NA	NA	NA
chr6	135724301	135725300	1kb_6021	MDKO_M_1738	1000	4.62	13.14	Down	-1.51	1.13e-05	0.000163887	Grin2b	NM_008171	-	135679822	136123528	Genebody	398728	NA	NA	NA	NA
chr6	135734201	135737400	2Kb_5237	MDKO_M_1739	3200	16.66	40.27	Down	-1.27	4.84e-11	2.05e-09	Grin2b	NM_008171	-	135679822	136123528	Genebody	387728	NA	NA	NA	NA
chr9	71334901	71336000	1kb_7427	MDKO_M_2167	1100	9.07	19.98	Down	-1.14	4.1e-05	0.000498713	Grinl1a	NM_178602	-	71326244	71333789	Promoter3k	-1661.5	NA	NA	NA	NA
chr19	60966401	60968800	2Kb_3185	MDKO_M_1064	2400	13.77	29.63	Down	-1.11	6.07e-07	8.58e-06	Grk5	NM_018869	+	60965651	61168457	Promoter3k	1949.5	NA	NA	NA	NA
chr6	110819201	110820600	1kb_5950	MDKO_M_1740	1400	5.91	18.25	Down	-1.63	9.88e-08	2.4e-06	Grm7	NM_177328	+	110595591	111517223	Genebody	224310	NA	NA	NA	NA
chr19	55281601	55282600	1kb_3662	MDKO_M_1065	1000	6.72	17.2	Down	-1.36	3.9e-05	0.000478771	Gucy2g	NM_001081076	-	55272590	55315725	Genebody	33624.5	NA	NA	NA	NA
chr11	107403501	107410000	5Kb_739	MDKO_M_348	6500	33.42	68.9	Down	-1.04	4.11e-11	1.61e-09	Helz	NM_198298	+	107409273	107548256	Promoter3k	-2522.5	NA	NA	NA	NA
chr11	74971001	74994000	10Kb_440	MDKO_M_349	23000	111.51	329.56	Down	-1.56	1.6e-10	2.84e-09	Hic1	NM_010430	-	74978066	74983756	Promoter3k	1255.5	NA	NA	NA	NA
chr13	21810001	21813600	2Kb_1544	MDKO_M_557	3600	20.06	51.98	Down	-1.37	1.39e-07	2.21e-06	Hist1h2bm	NM_178200	+	21813966	21814346	Promoter3k	-2165.5	NA	NA	NA	NA
chr13	21872001	21887000	10Kb_715	MDKO_M_558	15000	70.42	154.81	Down	-1.14	1.4e-11	1.6e-09	Hist1h2bp	NM_178202	+	21879356	21881081	ProximalPromoter	144.5	NA	NA	NA	NA
chr8	59988601	59990100	1kb_6770	MDKO_M_2055	1500	4.42	18.77	Down	-2.09	1.4e-09	5.43e-08	Hmgb2	NM_008252	+	59990639	59994795	Promoter3k	-1288.5	NA	NA	NA	NA
chr9	75966401	75969200	2Kb_6389	MDKO_M_2168	2800	13.83	33.28	Down	-1.27	6.07e-09	1.28e-07	Hmgcll1	NM_173731	+	75862783	75984156	Genebody	105018	NA	NA	NA	NA
chr9	75973201	75975600	2Kb_6390	MDKO_M_2169	2400	12.42	28.07	Down	-1.18	5.29e-06	6.15e-05	Hmgcll1	NM_173731	+	75862783	75984156	Genebody	111618	NA	NA	NA	NA
chr18	61691501	61697000	5Kb_1799	MDKO_M_1004	5500	59.82	21.76	Up	1.46	3.11e-12	1.15e-09	4933429F08Rik	NM_177828	-	61653447	61696189	Promoter3k	1938.5	NA	NA	NA	NA
chr18	62060301	62061400	1kb_3331	MDKO_M_1005	1100	12.63	3.07	Up	2.04	4.92e-07	1.02e-05	Ablim3	NM_198649	-	61959048	62071477	Genebody	10626.5	NA	NA	NA	NA
chr18	61128001	61129100	1kb_3324	MDKO_M_1006	1100	14.45	4.58	Up	1.66	1.1e-05	0.000160243	Camk2a	NM_009792	+	61123207	61147805	Genebody	5343.5	NA	NA	NA	NA
chr18	16964501	16971000	5Kb_1733	MDKO_M_1007	6500	68.93	21.65	Up	1.67	2.74e-10	6.4e-09	Cdh2	NM_007664	-	16747385	16967557	ProximalPromoter	-193.5	NA	NA	NA	NA
chr18	20712001	20719500	5Kb_1734	MDKO_M_1008	7500	71.95	28.4	Up	1.34	4.53e-12	1.15e-09	Dsg2	NM_007883	+	20716616	20763026	Promoter1k	-865.5	NA	NA	NA	NA
chr18	45718001	45724000	5Kb_1775	MDKO_M_1009	6000	64.57	21.37	Up	1.6	1.08e-10	3.03e-09	Kcnn2	NM_080465	+	45719807	45845536	Promoter3k	1193.5	NA	NA	NA	NA
chr18	75112001	75126000	10Kb_1327	MDKO_M_1010	14000	133.81	64.01	Up	1.06	5.09e-11	1.63e-09	Lipg	NM_010720	-	75098975	75120916	Promoter3k	1915.5	NA	NA	NA	NA
chr18	64482001	64515000	10Kb_1314	MDKO_M_1011	33000	472.19	141.62	Up	1.74	2.82e-09	3.38e-08	Onecut2	NM_194268	+	64500017	64558141	Promoter3k	-1516.5	NA	NA	NA	NA
chr18	32292401	32293800	1kb_3212	MDKO_M_1012	1400	16.92	5.6	Up	1.6	7.03e-07	1.4e-05	Proc	NM_001042768	-	32282779	32297858	Genebody	4757.5	NA	NA	NA	NA
chr18	51276601	51277700	1kb_3291	MDKO_M_1013	1100	13.93	2.73	Up	2.35	4.27e-09	1.43e-07	Prr16	NM_001081224	+	51277551	51464294	Promoter1k	-400.5	NA	NA	NA	NA
chr18	75041101	75042300	1kb_3392	MDKO_M_1015	1200	13.59	2.39	Up	2.51	8.01e-09	2.49e-07	0	0	0	0	0	OtherIntergenic	NA	NA	NA	NA	NA
chr19	40004501	40010500	5Kb_1937	MDKO_M_1016	6000	15.93	72.37	Down	-2.18	1.55e-12	1.15e-09	0	0	0	0	0	OtherIntergenic	NA	NA	NA	NA	NA
chr19	40016501	40024000	5Kb_1938	MDKO_M_1017	7500	18.52	77.8	Down	-2.07	9.29e-12	1.15e-09	0	0	0	0	0	OtherIntergenic	NA	NA	NA	NA	NA
chr19	40026601	40029600	2Kb_3085	MDKO_M_1018	3000	10.38	40.12	Down	-1.95	6.73e-10	1.84e-08	0	0	0	0	0	OtherIntergenic	NA	NA	NA	NA	NA
chr19	18079801	18081800	2Kb_3010	MDKO_M_1019	2000	6.39	22.36	Down	-1.81	8.47e-10	2.25e-08	0	0	0	0	0	OtherIntergenic	NA	NA	NA	NA	NA
chr19	26540301	26541400	1kb_3514	MDKO_M_1020	1100	4.5	15.05	Down	-1.74	3.84e-06	6.34e-05	0	0	0	0	0	OtherIntergenic	NA	NA	NA	NA	NA
chr19	57493201	57495400	2Kb_3169	MDKO_M_1021	2200	10.42	32.66	Down	-1.65	6.2e-10	1.72e-08	0	0	0	0	0	OtherIntergenic	NA	NA	NA	NA	NA
chr19	5925401	5926400	1kb_3451	MDKO_M_1022	1000	6.76	19.15	Down	-1.5	6.73e-06	0.00010424	0	0	0	0	0	OtherIntergenic	NA	NA	NA	NA	NA
chr19	58232201	58233200	1kb_3690	MDKO_M_1023	1000	6.69	18.31	Down	-1.45	5.01e-05	0.000593114	0	0	0	0	0	OtherIntergenic	NA	NA	NA	NA	NA
chr19	18379401	18383000	2Kb_3011	MDKO_M_1024	3600	15.12	41.02	Down	-1.44	1.49e-07	2.35e-06	0	0	0	0	0	OtherIntergenic	NA	NA	NA	NA	NA
chr19	36891901	36893200	1kb_3572	MDKO_M_1025	1300	6.4	17.27	Down	-1.43	2.02e-06	3.59e-05	0	0	0	0	0	OtherIntergenic	NA	NA	NA	NA	NA
chr10	79473001	79491000	10Kb_273	MDKO_M_255	18000	89.78	202	Down	-1.17	1.68e-09	2.09e-08	Hmha1	NM_001142701	+	79479416	79494215	Promoter3k	2584.5	NA	NA	NA	NA
chr3	98616501	98623500	5Kb_2447	MDKO_M_1359	7000	22.09	68.01	Down	-1.62	1.25e-12	1.15e-09	Hsd3b6	NM_013821	-	98609426	98618365	Promoter3k	-1635.5	NA	NA	NA	NA
chr8	26146501	26147600	1kb_6704	MDKO_M_2056	1100	10.75	23.83	Down	-1.15	7.25e-05	0.00080704	Htra4	NM_001081187	-	26135399	26149433	Promoter3k	2382.5	NA	NA	NA	NA
chr19	34132001	34133300	1kb_3554	MDKO_M_1029	1300	6.68	17.17	Down	-1.36	4.58e-06	7.41e-05	0	0	0	0	0	OtherIntergenic	NA	NA	NA	NA	NA
chr9	20835001	20839200	2Kb_6100	MDKO_M_2170	4200	35.95	81.25	Down	-1.18	1.67e-05	0.000172202	Icam5	NM_008319	+	20836481	20843479	Promoter1k	619.5	NA	NA	NA	NA
chr19	27199801	27200900	1kb_3515	MDKO_M_1031	1100	6.02	15.14	Down	-1.33	2.19e-05	0.000291354	0	0	0	0	0	OtherIntergenic	NA	NA	NA	NA	NA
chr17	35954501	35960000	5Kb_1633	MDKO_M_894	5500	25.37	56.34	Down	-1.15	1.12e-10	3.12e-09	Ier3	NM_133662	+	35958657	35959855	Promoter3k	-1406.5	NA	NA	NA	NA
chr19	25296801	25298800	2Kb_3021	MDKO_M_1033	2000	9.09	22.47	Down	-1.3	3.56e-07	5.28e-06	0	0	0	0	0	OtherIntergenic	NA	NA	NA	NA	NA
chr19	17940001	17961000	10Kb_1368	MDKO_M_1034	21000	96.1	234.69	Down	-1.29	3.93e-11	1.6e-09	0	0	0	0	0	OtherIntergenic	NA	NA	NA	NA	NA
chr19	45612101	45613100	1kb_3628	MDKO_M_1035	1000	5.8	14.2	Down	-1.29	6.4e-05	0.000727623	0	0	0	0	0	OtherIntergenic	NA	NA	NA	NA	NA
chr19	44312001	44398000	10Kb_1415	MDKO_M_1036	86000	600.9	1459.35	Down	-1.28	1.13e-07	1.07e-06	0	0	0	0	0	OtherIntergenic	NA	NA	NA	NA	NA
chr19	18439001	18444000	5Kb_1893	MDKO_M_1037	5000	24.84	60.34	Down	-1.28	8.27e-10	1.65e-08	0	0	0	0	0	OtherIntergenic	NA	NA	NA	NA	NA
chr19	14836801	14838800	2Kb_2995	MDKO_M_1038	2000	9.74	23.35	Down	-1.26	5.63e-06	6.52e-05	0	0	0	0	0	Genedesert	NA	NA	NA	NA	NA
chr19	34161001	34163800	2Kb_3056	MDKO_M_1039	2800	14.45	34.09	Down	-1.24	3.87e-09	8.59e-08	0	0	0	0	0	OtherIntergenic	NA	NA	NA	NA	NA
chr6	49040001	49059000	10Kb_2316	MDKO_M_1741	19000	84.57	202.07	Down	-1.26	3.7e-11	1.6e-09	Igf2bp3	NM_023670	-	49035217	49164952	Genebody	115452	NA	NA	NA	NA
chr19	27729001	27737000	5Kb_1905	MDKO_M_1041	8000	36.22	83.25	Down	-1.2	6.12e-12	1.15e-09	0	0	0	0	0	OtherIntergenic	NA	NA	NA	NA	NA
chr1	40500201	40501200	1kb_60	MDKO_M_94	1000	5.49	16.2	Down	-1.56	1.57e-06	2.87e-05	Il1rl1	NM_010743	+	40496493	40505206	Genebody	4207.5	NA	NA	NA	NA
chr19	53129001	53190000	10Kb_1431	MDKO_M_1043	61000	345.22	772.49	Down	-1.16	8.15e-09	8.95e-08	0	0	0	0	0	OtherIntergenic	NA	NA	NA	NA	NA
chr19	47242201	47243600	1kb_3640	MDKO_M_1044	1400	9.73	21.76	Down	-1.16	3.83e-05	0.000470673	0	0	0	0	0	OtherIntergenic	NA	NA	NA	NA	NA
chr19	53193001	53223000	10Kb_1432	MDKO_M_1045	30000	168.59	374.57	Down	-1.15	4.45e-10	6.51e-09	0	0	0	0	0	OtherIntergenic	NA	NA	NA	NA	NA
chr19	29996501	30004500	5Kb_1911	MDKO_M_1066	8000	38.76	81.9	Down	-1.08	7.38e-12	1.15e-09	Il33	NM_133775	+	29999603	30035204	Promoter1k	897.5	NA	NA	NA	NA
chr19	17624601	17627000	2Kb_3005	MDKO_M_1047	2400	12.32	27.29	Down	-1.15	1.59e-06	2.08e-05	0	0	0	0	0	OtherIntergenic	NA	NA	NA	NA	NA
chr19	14777001	14812000	10Kb_1364	MDKO_M_1048	35000	174.79	386.19	Down	-1.14	5.03e-11	1.62e-09	0	0	0	0	0	Genedesert	NA	NA	NA	NA	NA
chr19	14325501	14335000	5Kb_1880	MDKO_M_1049	9500	43.27	95.66	Down	-1.14	6.57e-12	1.15e-09	0	0	0	0	0	OtherIntergenic	NA	NA	NA	NA	NA
chr19	16126001	16128000	2Kb_3001	MDKO_M_1050	2000	10.66	23.31	Down	-1.13	8.91e-06	9.87e-05	0	0	0	0	0	OtherIntergenic	NA	NA	NA	NA	NA
chr3	7569001	7580000	10Kb_1737	MDKO_M_1360	11000	51.27	107.11	Down	-1.06	6.95e-09	7.75e-08	Il7	NM_008371	-	7572076	7613426	Genebody	38925.5	NA	NA	NA	NA
chr6	29160201	29167800	2Kb_4968	MDKO_M_1742	7600	33.61	131.76	Down	-1.97	1.4e-11	9.77e-10	Impdh1	NM_011829	-	29150439	29162270	Promoter3k	-1730.5	NA	NA	NA	NA
chr19	17934801	17937000	2Kb_3007	MDKO_M_1053	2200	12.65	27.05	Down	-1.1	2.38e-06	2.99e-05	0	0	0	0	0	OtherIntergenic	NA	NA	NA	NA	NA
chr19	18549501	18557000	5Kb_1894	MDKO_M_1054	7500	38.82	80.32	Down	-1.05	6.48e-11	2.11e-09	0	0	0	0	0	OtherIntergenic	NA	NA	NA	NA	NA
chr19	27243001	27258000	10Kb_1377	MDKO_M_1055	15000	80.44	164.39	Down	-1.03	3.16e-09	3.73e-08	0	0	0	0	0	OtherIntergenic	NA	NA	NA	NA	NA
chr1	89567001	89569000	2Kb_178	MDKO_M_95	2000	9.98	22.12	Down	-1.15	9.18e-06	0.000101286	Inpp5d	NM_001110192	+	89516886	89617082	Genebody	51114.5	NA	NA	NA	NA
chr19	45106601	45108600	2Kb_3112	MDKO_M_1057	2000	14.43	29.08	Down	-1.01	5.33e-05	0.000479579	0	0	0	0	0	OtherIntergenic	NA	NA	NA	NA	NA
chr19	56718001	56787000	10Kb_1443	MDKO_M_1058	69000	522.94	1045.93	Down	-1	2.96e-09	3.54e-08	0	0	0	0	0	OtherIntergenic	NA	NA	NA	NA	NA
chr19	3752101	3753200	1kb_3435	MDKO_M_1059	1100	11.05	22.08	Down	-1	0.000112413	0.00117002	0	0	0	0	0	OtherIntergenic	NA	NA	NA	NA	NA
chr9	106525001	106527600	2Kb_6473	MDKO_M_2171	2600	16.12	33.52	Down	-1.06	1.41e-06	1.86e-05	Iqcf6	NM_001101628	+	106528912	106529942	Promoter3k	-2611.5	NA	NA	NA	NA
chr13	115645001	115647000	2Kb_1805	MDKO_M_559	2000	7.24	23.07	Down	-1.67	8.4e-10	2.24e-08	Itga2	NM_008396	-	115626119	115722248	Genebody	76247.5	NA	NA	NA	NA
chr2	60436201	60437600	1kb_3882	MDKO_M_1182	1400	9.85	23.7	Down	-1.27	6.06e-06	9.49e-05	Itgb6	NM_021359	-	60436349	60511749	Genebody	74848.5	NA	NA	NA	NA
chr2	60490201	60492800	2Kb_3343	MDKO_M_1183	2600	13.81	29.4	Down	-1.09	8.54e-07	1.17e-05	Itgb6	NM_021359	-	60436349	60511749	Genebody	20248.5	NA	NA	NA	NA
chr1	182253001	182272000	10Kb_183	MDKO_M_96	19000	90.07	206.7	Down	-1.2	4.71e-11	1.6e-09	Itpkb	NM_001081175	+	182260606	182353789	Promoter3k	1894.5	NA	NA	NA	NA
chr16	91882401	91884800	2Kb_2456	MDKO_M_830	2400	13.99	31.27	Down	-1.16	9.54e-08	1.57e-06	Itsn1	NM_010587	+	91729615	91920823	Genebody	153986	NA	NA	NA	NA
chr2	163207701	163208700	1kb_4187	MDKO_M_1184	1000	6.29	15.11	Down	-1.26	8.46e-05	0.000912579	Jph2	NM_021566	-	163163508	163223685	Genebody	15484.5	NA	NA	NA	NA
chr16	34371901	34373100	1kb_2762	MDKO_M_831	1200	6.65	17.78	Down	-1.42	1.58e-06	2.89e-05	Kalrn	NM_001164268	-	34152110	34514112	Genebody	141612	NA	NA	NA	NA
chr16	34302301	34303600	1kb_2761	MDKO_M_832	1300	6.97	17.39	Down	-1.32	6.91e-06	0.000106689	Kalrn	NM_001164268	-	34152110	34514112	Genebody	211162	NA	NA	NA	NA
chr17	33946001	33952500	5Kb_1621	MDKO_M_895	6500	38.81	80.88	Down	-1.06	2.09e-08	3.13e-07	Kank3	NM_030697	+	33947467	33959858	Promoter3k	1783.5	NA	NA	NA	NA
chr4	98456401	98458800	2Kb_4252	MDKO_M_1478	2400	15.15	30.6	Down	-1.01	1.11e-06	1.5e-05	Kank4	NM_172872	-	98421582	98484227	Genebody	26626.5	NA	NA	NA	NA
chr19	5612301	5613300	1kb_3448	MDKO_M_1067	1000	5.06	14.07	Down	-1.48	7.42e-06	0.000113628	Kat5	NM_178637	-	5603417	5610028	Promoter3k	-2772.5	NA	NA	NA	NA
chr1	194187001	194240000	10Kb_211	MDKO_M_97	53000	376.1	755.85	Down	-1.01	4.61e-10	6.7e-09	Kcnh1	NM_010600	+	194014753	194334039	Genebody	198748	NA	NA	NA	NA
chr11	105886601	105888800	2Kb_1200	MDKO_M_350	2200	15.95	31.94	Down	-1	1.5e-05	0.000156664	Kcnh6	NM_001037712	+	105869516	105895377	Genebody	18184.5	NA	NA	NA	NA
chr7	25169101	25170100	1kb_6093	MDKO_M_1794	1000	9.76	21.21	Down	-1.12	4.71e-05	0.000562156	Kcnn4	NM_008433	+	25155281	25170229	Genebody	14319.5	NA	NA	NA	NA
chr7	150548001	150550000	2Kb_5691	MDKO_M_1900	2000	10.92	24.89	Down	-1.19	3.43e-06	4.17e-05	Kcnq1	NM_008434	+	150293158	150612946	Genebody	255842	NA	NA	NA	NA
chr15	65899701	65900700	1kb_2475	MDKO_M_735	1000	4.41	13.16	Down	-1.58	4.46e-05	0.000536931	Kcnq3	NM_152923	-	65826477	66117785	Genebody	217584	NA	NA	NA	NA
chr15	65906401	65908400	2Kb_2121	MDKO_M_736	2000	11.67	26.75	Down	-1.2	1.03e-05	0.000112259	Kcnq3	NM_152923	-	65826477	66117785	Genebody	210384	NA	NA	NA	NA
chr1	21442001	21444000	2Kb_19	MDKO_M_98	2000	11.23	25.12	Down	-1.16	5.11e-06	5.97e-05	Kcnq5	NM_023872	-	21388488	21952022	Genebody	509022	NA	NA	NA	NA
chr19	27378001	27421000	10Kb_1380	MDKO_M_1068	43000	236.53	534.67	Down	-1.18	1.35e-10	2.51e-09	Kcnv2	NM_183179	+	27397108	27411668	Promoter3k	2392.5	NA	NA	NA	NA
chr13	47026201	47029400	2Kb_1680	MDKO_M_560	3200	18.36	42.42	Down	-1.21	1.14e-07	1.85e-06	Kif13a	NM_010617	-	46844456	47025086	Promoter3k	-2714.5	NA	NA	NA	NA
chr19	43902501	43907500	5Kb_1946	MDKO_M_1081	5000	49.03	10.17	Up	2.27	5.61e-13	1.15e-09	Abcc2	NM_013806	+	43856797	43912707	Genebody	48203.5	NA	NA	NA	NA
chr19	57270401	57272600	2Kb_3167	MDKO_M_1082	2200	24.62	7.18	Up	1.78	4.99e-10	1.42e-08	Ablim1	NM_001103177	-	57107753	57271981	Promoter1k	480.5	NA	NA	NA	NA
chr19	44056001	44067000	10Kb_1413	MDKO_M_1083	11000	108.94	37.72	Up	1.53	3.53e-09	4.12e-08	Cpn1	NM_030703	-	44030799	44061009	Promoter1k	-491.5	NA	NA	NA	NA
chr19	58518001	58541000	10Kb_1451	MDKO_M_1085	23000	264.92	106.4	Up	1.32	3.55e-10	5.34e-09	Gfra1	NM_010279	-	58311181	58528955	Promoter1k	-545.5	NA	NA	NA	NA
chr19	12672201	12674200	2Kb_2985	MDKO_M_1086	2000	21.71	5.5	Up	1.98	4.1e-09	9.01e-08	Gm4952	NM_001167907	+	12674473	12702104	Promoter3k	-1272.5	NA	NA	NA	NA
chr19	10312801	10316200	2Kb_2979	MDKO_M_1087	3400	41.62	14.32	Up	1.54	4.19e-09	9.18e-08	Gm98	NM_001033481	-	10282761	10315237	Promoter1k	736.5	NA	NA	NA	NA
chr19	56365401	56367600	2Kb_3144	MDKO_M_1088	2200	23.98	7.82	Up	1.62	1.75e-08	3.37e-07	Habp2	NM_146101	+	56362427	56394578	Genebody	4073.5	NA	NA	NA	NA
chr19	38195001	38203000	5Kb_1936	MDKO_M_1090	8000	79.06	25.02	Up	1.66	5.56e-12	1.15e-09	Rbp4	NM_011255	-	38191109	38199300	Promoter1k	299.5	NA	NA	NA	NA
chr19	45060501	45067500	5Kb_1957	MDKO_M_1091	7000	74.71	22.07	Up	1.76	7.53e-12	1.15e-09	Sema4g	NM_011976	+	45063833	45077884	ProximalPromoter	167.5	NA	NA	NA	NA
chr19	26673001	26678000	5Kb_1899	MDKO_M_1092	5000	52.29	26.22	Up	1	6.76e-08	9.28e-07	0	0	0	0	0	OtherIntergenic	NA	NA	NA	NA	NA
chr19	24298701	24300100	1kb_3513	MDKO_M_1093	1400	18.12	2.18	Up	3.06	1.85e-11	1.49e-09	Tjp2	NM_011597	-	24168991	24299443	ProximalPromoter	42.5	NA	NA	NA	NA
chr19	32828201	32829200	1kb_3553	MDKO_M_1094	1000	13.44	4.07	Up	1.72	3.72e-06	6.19e-05	0	0	0	0	0	OtherIntergenic	NA	NA	NA	NA	NA
chr19	10707001	10725000	10Kb_1361	MDKO_M_1095	18000	194.17	69.86	Up	1.47	8.23e-11	1.88e-09	Vwce	NM_027913	+	10708722	10739699	Genebody	7278.5	NA	NA	NA	NA
chr11	102785401	102786400	1kb_1374	MDKO_M_351	1000	5.74	16.33	Down	-1.51	8.47e-05	0.00091286	Kif18b	NM_197959	-	102766832	102786437	Promoter1k	536.5	NA	NA	NA	NA
chr2	63700901	63702100	1kb_3887	MDKO_M_1097	1200	4.58	18.46	Down	-2.01	2.44e-08	6.76e-07	0	0	0	0	0	OtherIntergenic	NA	NA	NA	NA	NA
chr2	114252201	114254200	2Kb_3465	MDKO_M_1098	2000	5.91	23.16	Down	-1.97	3.97e-11	1.79e-09	0	0	0	0	0	OtherIntergenic	NA	NA	NA	NA	NA
chr2	71705601	71706600	1kb_3910	MDKO_M_1099	1000	3.51	13.76	Down	-1.97	4.93e-07	1.03e-05	0	0	0	0	0	OtherIntergenic	NA	NA	NA	NA	NA
chr2	81102001	81117000	10Kb_1565	MDKO_M_1100	15000	43.14	162.75	Down	-1.92	5.47e-11	1.63e-09	0	0	0	0	0	Genedesert	NA	NA	NA	NA	NA
chr2	30566901	30568000	1kb_3781	MDKO_M_1101	1100	3.78	14.17	Down	-1.9	3.21e-07	6.96e-06	0	0	0	0	0	OtherIntergenic	NA	NA	NA	NA	NA
chr4	41360101	41361100	1kb_4731	MDKO_M_1479	1000	4.09	13.93	Down	-1.77	2.26e-07	5.06e-06	Kif24	NM_024241	-	41337780	41411880	Genebody	51279.5	NA	NA	NA	NA
chr2	43076701	43077700	1kb_3834	MDKO_M_1103	1000	3.8	13.42	Down	-1.82	3.29e-06	5.53e-05	0	0	0	0	0	OtherIntergenic	NA	NA	NA	NA	NA
chr2	147349001	147351800	2Kb_3584	MDKO_M_1104	2800	8.74	30.4	Down	-1.8	3.42e-12	5.53e-10	0	0	0	0	0	OtherIntergenic	NA	NA	NA	NA	NA
chr2	49539101	49540400	1kb_3851	MDKO_M_1185	1300	8.25	18.83	Down	-1.19	1.55e-05	0.000215904	Kif5c	NM_008449	+	49474833	49630297	Genebody	64917.5	NA	NA	NA	NA
chr2	109333501	109338500	5Kb_2167	MDKO_M_1106	5000	16.24	52.88	Down	-1.7	8.43e-13	1.15e-09	0	0	0	0	0	OtherIntergenic	NA	NA	NA	NA	NA
chr2	120454601	120458000	2Kb_3491	MDKO_M_1107	3400	12.67	40.62	Down	-1.68	1.44e-12	5e-10	0	0	0	0	0	OtherIntergenic	NA	NA	NA	NA	NA
chr2	148414201	148415200	1kb_4145	MDKO_M_1108	1000	3.94	12.59	Down	-1.68	1.8e-05	0.00024638	0	0	0	0	0	OtherIntergenic	NA	NA	NA	NA	NA
chr2	67552201	67554200	2Kb_3351	MDKO_M_1109	2000	7.62	24.06	Down	-1.66	2.05e-09	4.89e-08	0	0	0	0	0	OtherIntergenic	NA	NA	NA	NA	NA
chr12	70339001	70347500	5Kb_864	MDKO_M_472	8500	39.77	89.19	Down	-1.17	4.61e-12	1.15e-09	Klhdc1	NM_178253	+	70342818	70384947	Promoter1k	432.5	NA	NA	NA	NA
chr18	21809001	21810000	1kb_3196	MDKO_M_985	1000	11.23	23.07	Down	-1.04	3.75e-05	0.0004635	Klhl14	NM_001081403	-	21708877	21810868	Promoter3k	1367.5	NA	NA	NA	NA
chr16	19959401	19961400	2Kb_2325	MDKO_M_833	2000	10.35	22.74	Down	-1.14	6.27e-06	7.18e-05	Klhl6	NM_183390	-	19946585	19983121	Genebody	22720.5	NA	NA	NA	NA
chr2	25023001	25024000	1kb_3757	MDKO_M_1113	1000	5.35	15.81	Down	-1.56	1.42e-05	0.000200442	0	0	0	0	0	OtherIntergenic	NA	NA	NA	NA	NA
chr2	92617601	92618600	1kb_3950	MDKO_M_1114	1000	5.35	15.48	Down	-1.53	7.54e-06	0.000114984	0	0	0	0	0	OtherIntergenic	NA	NA	NA	NA	NA
chr2	119983201	119984200	1kb_4033	MDKO_M_1115	1000	4.99	14.42	Down	-1.53	2.5e-05	0.000326671	0	0	0	0	0	OtherIntergenic	NA	NA	NA	NA	NA
chr2	11471001	11478500	5Kb_2003	MDKO_M_1116	7500	25.97	74.64	Down	-1.52	2.45e-12	1.15e-09	0	0	0	0	0	OtherIntergenic	NA	NA	NA	NA	NA
chr2	54050401	54053200	2Kb_3330	MDKO_M_1117	2800	12.96	36.57	Down	-1.5	2.12e-11	1.21e-09	0	0	0	0	0	OtherIntergenic	NA	NA	NA	NA	NA
chr2	167076201	167077200	1kb_4201	MDKO_M_1118	1000	4.9	13.85	Down	-1.5	5.7e-05	0.00066058	0	0	0	0	0	OtherIntergenic	NA	NA	NA	NA	NA
chr2	170028501	170034500	5Kb_2313	MDKO_M_1119	6000	23.62	65.7	Down	-1.48	2.63e-12	1.15e-09	0	0	0	0	0	OtherIntergenic	NA	NA	NA	NA	NA
chr2	127443001	127445200	2Kb_3504	MDKO_M_1120	2200	11.68	32.24	Down	-1.47	1.3e-09	3.29e-08	0	0	0	0	0	OtherIntergenic	NA	NA	NA	NA	NA
chr2	170038001	170055000	10Kb_1710	MDKO_M_1121	17000	64.51	176.98	Down	-1.46	7.01e-11	1.76e-09	0	0	0	0	0	OtherIntergenic	NA	NA	NA	NA	NA
chr2	60410001	60427000	10Kb_1540	MDKO_M_1122	17000	60.34	162.1	Down	-1.43	5.14e-11	1.63e-09	0	0	0	0	0	OtherIntergenic	NA	NA	NA	NA	NA
chr2	29673501	29679000	5Kb_2034	MDKO_M_1123	5500	22.75	60.81	Down	-1.42	3.03e-10	6.97e-09	0	0	0	0	0	OtherIntergenic	NA	NA	NA	NA	NA
chr2	5651001	5652200	1kb_3717	MDKO_M_1124	1200	7.4	19.78	Down	-1.42	3.91e-06	6.44e-05	0	0	0	0	0	OtherIntergenic	NA	NA	NA	NA	NA
chr2	63539601	63541100	1kb_3885	MDKO_M_1125	1500	9.44	25.02	Down	-1.41	6.49e-07	1.31e-05	0	0	0	0	0	OtherIntergenic	NA	NA	NA	NA	NA
chr2	127673401	127674400	1kb_4047	MDKO_M_1126	1000	7.71	20.45	Down	-1.41	8.28e-05	0.00089862	0	0	0	0	0	OtherIntergenic	NA	NA	NA	NA	NA
chr2	45682001	45701000	10Kb_1530	MDKO_M_1127	19000	75.56	197.43	Down	-1.39	1.35e-11	1.6e-09	0	0	0	0	0	Genedesert	NA	NA	NA	NA	NA
chr2	18554601	18557800	2Kb_3212	MDKO_M_1128	3200	14.63	37.75	Down	-1.37	3.06e-08	5.59e-07	0	0	0	0	0	OtherIntergenic	NA	NA	NA	NA	NA
chr2	133574201	133577000	2Kb_3558	MDKO_M_1129	2800	12.27	31.65	Down	-1.37	2.7e-10	8.33e-09	0	0	0	0	0	OtherIntergenic	NA	NA	NA	NA	NA
chr2	106794501	106800500	5Kb_2166	MDKO_M_1130	6000	27.18	69.76	Down	-1.36	2.61e-12	1.15e-09	0	0	0	0	0	OtherIntergenic	NA	NA	NA	NA	NA
chr2	34494401	34495400	1kb_3810	MDKO_M_1131	1000	6.01	15.43	Down	-1.36	6.75e-05	0.000760191	0	0	0	0	0	OtherIntergenic	NA	NA	NA	NA	NA
chr2	54030001	54053000	10Kb_1535	MDKO_M_1132	23000	94.14	240.1	Down	-1.35	4.41e-11	1.6e-09	0	0	0	0	0	OtherIntergenic	NA	NA	NA	NA	NA
chr2	133317501	133322500	5Kb_2221	MDKO_M_1133	5000	21.39	54.61	Down	-1.35	7.32e-11	2.27e-09	0	0	0	0	0	OtherIntergenic	NA	NA	NA	NA	NA
chr2	51889301	51890300	1kb_3853	MDKO_M_1134	1000	5.92	14.97	Down	-1.34	3.3e-05	0.000415421	0	0	0	0	0	OtherIntergenic	NA	NA	NA	NA	NA
chr2	179019201	179020600	1kb_4263	MDKO_M_1135	1400	8.07	20.09	Down	-1.32	1.73e-06	3.13e-05	0	0	0	0	0	OtherIntergenic	NA	NA	NA	NA	NA
chr2	59367301	59368700	1kb_3876	MDKO_M_1136	1400	8.06	20.01	Down	-1.31	3.2e-06	5.39e-05	0	0	0	0	0	OtherIntergenic	NA	NA	NA	NA	NA
chr2	3289601	3290700	1kb_3715	MDKO_M_1137	1100	7.21	17.58	Down	-1.29	3.73e-05	0.000461088	0	0	0	0	0	OtherIntergenic	NA	NA	NA	NA	NA
chr2	17205001	17206000	1kb_3733	MDKO_M_1138	1000	6.26	15.26	Down	-1.29	7.18e-05	0.000801194	0	0	0	0	0	OtherIntergenic	NA	NA	NA	NA	NA
chr2	169766001	169778000	10Kb_1707	MDKO_M_1139	12000	45.84	111.32	Down	-1.28	8.28e-12	1.6e-09	0	0	0	0	0	OtherIntergenic	NA	NA	NA	NA	NA
chr2	130412901	130414000	1kb_4066	MDKO_M_1140	1100	7.33	17.74	Down	-1.28	8.2e-06	0.000123754	0	0	0	0	0	OtherIntergenic	NA	NA	NA	NA	NA
chr2	114196001	114225000	10Kb_1604	MDKO_M_1141	29000	138.99	335.97	Down	-1.27	2.98e-10	4.63e-09	0	0	0	0	0	OtherIntergenic	NA	NA	NA	NA	NA
chr2	133505001	133507400	2Kb_3555	MDKO_M_1142	2400	12.47	29.65	Down	-1.25	2.61e-08	4.86e-07	0	0	0	0	0	OtherIntergenic	NA	NA	NA	NA	NA
chr2	128113901	128114900	1kb_4058	MDKO_M_1143	1000	7.27	17.21	Down	-1.24	3.9e-05	0.000478771	0	0	0	0	0	OtherIntergenic	NA	NA	NA	NA	NA
chr2	10707201	10708200	1kb_3727	MDKO_M_1144	1000	6.67	15.68	Down	-1.23	8.26e-05	0.000897121	0	0	0	0	0	OtherIntergenic	NA	NA	NA	NA	NA
chr2	93719501	93720500	1kb_3955	MDKO_M_1145	1000	7.39	16.99	Down	-1.2	7.64e-05	0.000840948	0	0	0	0	0	OtherIntergenic	NA	NA	NA	NA	NA
chr2	60431901	60433100	1kb_3881	MDKO_M_1146	1200	8.71	19.67	Down	-1.17	8.1e-05	0.00088332	0	0	0	0	0	OtherIntergenic	NA	NA	NA	NA	NA
chr2	106480001	106504000	10Kb_1597	MDKO_M_1147	24000	121.12	270.81	Down	-1.16	2.57e-10	4.12e-09	0	0	0	0	0	OtherIntergenic	NA	NA	NA	NA	NA
chr2	48318001	48334000	10Kb_1532	MDKO_M_1148	16000	71.33	158.69	Down	-1.15	1.95e-11	1.6e-09	0	0	0	0	0	Genedesert	NA	NA	NA	NA	NA
chr6	128766001	128790000	10Kb_2423	MDKO_M_1743	24000	137.87	298.64	Down	-1.12	4.54e-11	1.6e-09	Klrb1b	NM_030599	-	128763723	128776332	Promoter3k	-1668.5	NA	NA	NA	NA
chr2	148704401	148706400	2Kb_3596	MDKO_M_1150	2000	10.54	23.21	Down	-1.14	1.51e-05	0.000157528	0	0	0	0	0	OtherIntergenic	NA	NA	NA	NA	NA
chr2	45313501	45319500	5Kb_2081	MDKO_M_1151	6000	28.53	62.3	Down	-1.13	4.81e-10	1.03e-08	0	0	0	0	0	Genedesert	NA	NA	NA	NA	NA
chr2	178308801	178310800	2Kb_3707	MDKO_M_1152	2000	10.76	23.53	Down	-1.13	6.61e-06	7.53e-05	0	0	0	0	0	OtherIntergenic	NA	NA	NA	NA	NA
chr2	10221601	10223800	2Kb_3200	MDKO_M_1153	2200	16.22	35.11	Down	-1.11	3.68e-07	5.44e-06	0	0	0	0	0	OtherIntergenic	NA	NA	NA	NA	NA
chr2	44831001	44838000	5Kb_2077	MDKO_M_1154	7000	35.66	76.32	Down	-1.1	9.5e-11	2.73e-09	0	0	0	0	0	OtherIntergenic	NA	NA	NA	NA	NA
chr2	148680801	148683000	2Kb_3595	MDKO_M_1155	2200	14.22	30.46	Down	-1.1	2.43e-07	3.68e-06	0	0	0	0	0	OtherIntergenic	NA	NA	NA	NA	NA
chr2	116792001	116808000	10Kb_1609	MDKO_M_1156	16000	72.51	154.26	Down	-1.09	8.48e-11	1.9e-09	0	0	0	0	0	OtherIntergenic	NA	NA	NA	NA	NA
chr2	138240001	138252000	10Kb_1646	MDKO_M_1157	12000	56.02	117.61	Down	-1.07	6.28e-11	1.68e-09	0	0	0	0	0	Genedesert	NA	NA	NA	NA	NA
chr2	133616501	133621500	5Kb_2229	MDKO_M_1158	5000	26.47	55.44	Down	-1.07	1.13e-07	1.49e-06	0	0	0	0	0	OtherIntergenic	NA	NA	NA	NA	NA
chr2	110047001	110064000	10Kb_1600	MDKO_M_1159	17000	76.33	159.03	Down	-1.06	3.11e-10	4.77e-09	0	0	0	0	0	OtherIntergenic	NA	NA	NA	NA	NA
chr2	106505201	106508000	2Kb_3444	MDKO_M_1160	2800	16.29	33.9	Down	-1.06	2.5e-05	0.000246952	0	0	0	0	0	OtherIntergenic	NA	NA	NA	NA	NA
chr2	116748001	116750000	2Kb_3473	MDKO_M_1161	2000	12.2	25.51	Down	-1.06	1.51e-05	0.000157327	0	0	0	0	0	OtherIntergenic	NA	NA	NA	NA	NA
chr5	124203001	124217000	10Kb_2229	MDKO_M_1615	14000	47.29	139.43	Down	-1.56	9.67e-12	1.6e-09	Kntc1	NM_001042421	+	124199734	124271601	Genebody	10266.5	NA	NA	NA	NA
chr2	10590001	10597000	5Kb_2002	MDKO_M_1163	7000	35.1	72.5	Down	-1.05	5.4e-11	1.89e-09	0	0	0	0	0	OtherIntergenic	NA	NA	NA	NA	NA
chr2	136495201	136497200	2Kb_3563	MDKO_M_1164	2000	12.64	26.2	Down	-1.05	1.38e-06	1.83e-05	0	0	0	0	0	OtherIntergenic	NA	NA	NA	NA	NA
chr2	147681001	147683000	2Kb_3589	MDKO_M_1165	2000	11.52	23.75	Down	-1.04	2.45e-05	0.000242365	0	0	0	0	0	OtherIntergenic	NA	NA	NA	NA	NA
chr2	131426801	131428800	2Kb_3535	MDKO_M_1166	2000	11.15	22.99	Down	-1.04	3.34e-05	0.000318231	0	0	0	0	0	OtherIntergenic	NA	NA	NA	NA	NA
chr2	78489001	78491800	2Kb_3385	MDKO_M_1167	2800	14.54	29.61	Down	-1.03	6.49e-06	7.41e-05	0	0	0	0	0	OtherIntergenic	NA	NA	NA	NA	NA
chr2	178361001	178375000	10Kb_1722	MDKO_M_1168	14000	74.48	149.82	Down	-1.01	1.29e-11	1.6e-09	0	0	0	0	0	OtherIntergenic	NA	NA	NA	NA	NA
chr2	63691501	63699500	5Kb_2096	MDKO_M_1169	8000	39.25	79.06	Down	-1.01	5.29e-08	7.38e-07	0	0	0	0	0	OtherIntergenic	NA	NA	NA	NA	NA
chr2	124591401	124593400	2Kb_3501	MDKO_M_1170	2000	12.19	24.36	Down	-1	1.38e-05	0.0001458	0	0	0	0	0	OtherIntergenic	NA	NA	NA	NA	NA
chr5	124234001	124246000	10Kb_2230	MDKO_M_1616	12000	45.4	116.29	Down	-1.36	9.07e-11	1.97e-09	Kntc1	NM_001042421	+	124199734	124271601	Genebody	40266.5	NA	NA	NA	NA
chr18	12594601	12596800	2Kb_2744	MDKO_M_986	2200	10.8	25.76	Down	-1.25	4.69e-07	6.79e-06	Lama3	NM_010680	+	12492532	12741518	Genebody	103168	NA	NA	NA	NA
chr12	31952001	32015000	10Kb_602	MDKO_M_473	63000	446.03	958.15	Down	-1.1	2.27e-08	2.34e-07	Lamb1-1	NM_008482	+	31950158	32014503	Genebody	33342.5	NA	NA	NA	NA
chr9	108381601	108384000	2Kb_6490	MDKO_M_2172	2400	11.29	31.77	Down	-1.49	1.54e-08	3e-07	Lamb2	NM_008483	+	108382192	108392860	Promoter1k	608.5	NA	NA	NA	NA
chr2	31785901	31787000	1kb_3789	MDKO_M_1186	1100	5.51	14.54	Down	-1.4	2.31e-05	0.000304571	Lamc3	NM_011836	+	31742800	31802054	Genebody	43650.5	NA	NA	NA	NA
chr15	99600201	99602800	2Kb_2253	MDKO_M_737	2600	9.4	35.66	Down	-1.92	2.01e-09	4.8e-08	Lass5	NM_028015	-	99566022	99602945	Promoter3k	1444.5	NA	NA	NA	NA
chr17	73259001	73278000	10Kb_1227	MDKO_M_896	19000	99.9	202.79	Down	-1.02	3.58e-11	1.6e-09	Lbh	NM_029999	+	73267644	73291285	Promoter1k	856.5	NA	NA	NA	NA
chr4	129228501	129235500	5Kb_2716	MDKO_M_1480	7000	30.09	73.59	Down	-1.29	2.02e-09	3.73e-08	Lck	NM_010693	-	129225587	129235615	Genebody	3614.5	NA	NA	NA	NA
chr16	26010401	26011700	1kb_2731	MDKO_M_834	1300	7.23	17.13	Down	-1.24	1.85e-05	0.000251421	Leprel1	NM_173379	-	25960408	26105869	Genebody	94818.5	NA	NA	NA	NA
chr15	78756401	78759200	2Kb_2171	MDKO_M_738	2800	8.91	32.98	Down	-1.89	1.11e-09	2.86e-08	Lgals1	NM_008495	+	78757154	78760894	Promoter1k	646.5	NA	NA	NA	NA
chr7	29650201	29652200	2Kb_5333	MDKO_M_1819	2000	12.26	24.65	Down	-1.01	1.82e-05	0.000185978	Lgals7	NM_008496	+	29649404	29651302	Promoter3k	1796.5	NA	NA	NA	NA
chr13	94873801	94875800	2Kb_1768	MDKO_M_561	2000	10.51	24.14	Down	-1.2	6.03e-06	6.94e-05	Lhfpl2	NM_172589	+	94827750	94965363	Genebody	47050.5	NA	NA	NA	NA
chr13	94934001	94954000	10Kb_811	MDKO_M_562	20000	120.14	242.39	Down	-1.01	7.62e-11	1.81e-09	Lhfpl2	NM_172589	+	94827750	94965363	Genebody	116250	NA	NA	NA	NA
chr7	13871001	13882000	10Kb_2446	MDKO_M_1785	11000	46.22	120.82	Down	-1.39	1.32e-11	1.6e-09	Lig1	NM_001083188	+	13864613	13896775	Genebody	11887.5	NA	NA	NA	NA
chr5	135159001	135169000	10Kb_2242	MDKO_M_1617	10000	45.78	94.75	Down	-1.05	1.23e-11	1.6e-09	Limk1	NM_010717	-	135131908	135164459	Promoter1k	458.5	NA	NA	NA	NA
chr1	182568601	182571800	2Kb_403	MDKO_M_99	3200	14.91	33.75	Down	-1.18	3.02e-08	5.53e-07	Lin9	NM_175186	+	182571464	182611756	Promoter3k	-1263.5	NA	NA	NA	NA
chr4	35699001	35723000	10Kb_1897	MDKO_M_1481	24000	113.24	249.09	Down	-1.14	2.95e-11	1.6e-09	Lingo2	NM_175516	-	35653896	35792444	Genebody	81443.5	NA	NA	NA	NA
chr16	21995201	21997200	2Kb_2329	MDKO_M_835	2000	13.17	29.02	Down	-1.14	1.11e-05	0.000120191	Liph	NM_001083894	-	21953890	21995614	Promoter1k	-586.5	NA	NA	NA	NA
chr17	17585201	17586200	1kb_2958	MDKO_M_897	1000	4.6	14.23	Down	-1.63	3.65e-05	0.000452297	Lix1	NM_025681	+	17539649	17596350	Genebody	46051.5	NA	NA	NA	NA
chr6	112270201	112271200	1kb_5955	MDKO_M_1744	1000	4.6	14.04	Down	-1.61	2.41e-05	0.000316126	Lmcd1	NM_144799	+	112223751	112280415	Genebody	46949.5	NA	NA	NA	NA
chr14	70047001	70049000	2Kb_1943	MDKO_M_658	2000	9.87	25.07	Down	-1.35	0.0001	0.000818247	Loxl2	NM_033325	+	70009282	70095639	Genebody	38718.5	NA	NA	NA	NA
chr14	70088001	70093500	5Kb_1211	MDKO_M_659	5500	26.79	56.6	Down	-1.08	1.83e-10	4.58e-09	Loxl2	NM_033325	+	70009282	70095639	Genebody	81468.5	NA	NA	NA	NA
chr4	58546901	58548100	1kb_4825	MDKO_M_1482	1200	10.05	21.91	Down	-1.12	8.03e-06	0.000121629	Lpar1	NM_172989	-	58448123	58566164	Genebody	18663.5	NA	NA	NA	NA
chr8	71413601	71416200	2Kb_5838	MDKO_M_2057	2600	13.35	29.23	Down	-1.13	1.16e-06	1.55e-05	Lpl	NM_008509	+	71404453	71430830	Genebody	10447.5	NA	NA	NA	NA
chr6	33979001	33981000	2Kb_4979	MDKO_M_1745	2000	15.11	30.26	Down	-1	1.42e-05	0.000149652	Lrguk	NM_028886	+	33979447	34084033	Promoter1k	553.5	NA	NA	NA	NA
chr7	146418801	146421400	2Kb_5664	MDKO_M_1895	2600	15.22	33.95	Down	-1.16	3.77e-08	6.76e-07	Lrrc27	NM_027164	+	146398886	146428871	Genebody	21214.5	NA	NA	NA	NA
chr1	92903001	92905400	2Kb_203	MDKO_M_100	2400	12.1	28.46	Down	-1.23	6.09e-08	1.04e-06	Lrrfip1	NM_001111312	+	92895303	93025520	Genebody	8897.5	NA	NA	NA	NA
chr1	92895001	92896000	1kb_224	MDKO_M_101	1000	7.63	17.8	Down	-1.22	9.67e-05	0.00101616	Lrrfip1	NM_001111312	+	92895303	93025520	ProximalPromoter	197.5	NA	NA	NA	NA
chr7	28093401	28096400	2Kb_5326	MDKO_M_1817	3000	22.72	48.7	Down	-1.1	5.41e-08	9.36e-07	Ltbp4	NM_001113549	-	28090159	28118666	Genebody	23765.5	NA	NA	NA	NA
chr11	50050601	50052800	2Kb_866	MDKO_M_352	2200	13.49	29.83	Down	-1.14	1.13e-06	1.53e-05	Ltc4s	NM_008521	-	50049973	50051972	Promoter1k	271.5	NA	NA	NA	NA
chr2	140573401	140575400	2Kb_3568	MDKO_M_1187	2000	7.65	23.83	Down	-1.64	3.29e-09	7.39e-08	Macrod2	NM_001013802	+	140221165	142215785	Genebody	353236	NA	NA	NA	NA
chr2	140581001	140599000	10Kb_1649	MDKO_M_1188	18000	88.8	211.95	Down	-1.26	1.7e-11	1.6e-09	Macrod2	NM_001013802	+	140221165	142215785	Genebody	368836	NA	NA	NA	NA
chr2	140613001	140615000	2Kb_3571	MDKO_M_1189	2000	12.76	25.96	Down	-1.02	7.67e-06	8.61e-05	Macrod2	NM_001013802	+	140221165	142215785	Genebody	392836	NA	NA	NA	NA
chr5	20096201	20099000	2Kb_4509	MDKO_M_1618	2800	15.56	36.04	Down	-1.21	7.07e-06	8e-05	Magi2	NM_015823	+	19413335	20210608	Genebody	684266	NA	NA	NA	NA
chr9	13465801	13467800	2Kb_6090	MDKO_M_2173	2000	7.68	23.57	Down	-1.62	4.06e-09	8.93e-08	Maml2	NM_001013813	+	13424432	13513976	Genebody	42368.5	NA	NA	NA	NA
chr9	13463001	13473000	10Kb_2808	MDKO_M_2174	10000	47.03	98.11	Down	-1.06	1.36e-11	1.6e-09	Maml2	NM_173776	+	13466903	13513976	Promoter3k	1097.5	NA	NA	NA	NA
chr1	39984501	39990000	5Kb_35	MDKO_M_102	5500	23.25	56.13	Down	-1.27	6.12e-12	1.15e-09	Map4k4	NM_008696	+	39957757	40083154	Genebody	29493.5	NA	NA	NA	NA
chr18	74171001	74173800	2Kb_2910	MDKO_M_987	2800	14.89	30.41	Down	-1.03	2.79e-06	3.45e-05	Mapk4	NM_172632	-	74088140	74224602	Genebody	52201.5	NA	NA	NA	NA
chr11	61305401	61307800	2Kb_936	MDKO_M_353	2400	7	27.6	Down	-1.98	6.9e-12	7.1e-10	Mapk7	NM_011841	-	61302313	61307704	Promoter3k	1103.5	NA	NA	NA	NA
chr9	107191001	107192500	1kb_7571	MDKO_M_2175	1500	4.8	17.73	Down	-1.89	9.29e-08	2.27e-06	Mapkapk3	NM_178907	-	107157257	107192207	Promoter1k	456.5	NA	NA	NA	NA
chr9	107180801	107183600	2Kb_6475	MDKO_M_2176	2800	11.37	32.25	Down	-1.5	1.15e-10	4.06e-09	Mapkapk3	NM_178907	-	107157257	107192207	Genebody	10006.5	NA	NA	NA	NA
chr18	23931001	23932300	1kb_3198	MDKO_M_988	1300	7.39	19.16	Down	-1.37	0.000154149	0.00159786	Mapre2	NM_001162941	+	23912225	24052361	Genebody	19425.5	NA	NA	NA	NA
chr10	36847001	36873000	10Kb_238	MDKO_M_256	26000	94.37	339.92	Down	-1.85	1.59e-10	2.83e-09	Marcks	NM_008538	-	36853048	36858731	Promoter3k	-1269.5	NA	NA	NA	NA
chr4	129182001	129196000	10Kb_2009	MDKO_M_1483	14000	54.45	139.55	Down	-1.36	1.67e-11	1.6e-09	Marcksl1	NM_010807	+	129190824	129193224	Promoter3k	-1823.5	NA	NA	NA	NA
chr18	44892401	44894600	2Kb_2806	MDKO_M_989	2200	14.12	28.16	Down	-1	7.97e-05	0.00067429	Mcc	NM_001085373	-	44584713	44971835	Genebody	78334.5	NA	NA	NA	NA
chr18	73933501	73939500	5Kb_1826	MDKO_M_990	6000	22.75	54.59	Down	-1.26	3.14e-10	7.14e-09	Me2	NM_145494	-	73929693	73975045	Genebody	38544.5	NA	NA	NA	NA
chr18	73965001	73988000	10Kb_1323	MDKO_M_991	23000	125.3	253.75	Down	-1.02	5.57e-11	1.64e-09	Me2	NM_145494	-	73929693	73975045	Promoter3k	-1455.5	NA	NA	NA	NA
chr7	96917001	96919000	2Kb_5467	MDKO_M_1844	2000	10.8	22.44	Down	-1.06	3.6e-05	0.000339581	Me3	NM_181407	+	96781327	97002868	Genebody	136674	NA	NA	NA	NA
chr3	30224001	30225000	1kb_4321	MDKO_M_1361	1000	6.11	15.49	Down	-1.34	3.2e-05	0.000404703	Mecom	NM_021442	-	30135490	30408408	Genebody	183908	NA	NA	NA	NA
chr2	115715401	115717400	2Kb_3467	MDKO_M_1190	2000	7.9	23.97	Down	-1.6	4.19e-09	9.19e-08	Meis2	NM_001159569	-	115686999	115890356	Genebody	173956	NA	NA	NA	NA
chr2	6017001	6028000	10Kb_1461	MDKO_M_1221	11000	106.05	52.33	Up	1.02	1.46e-11	1.6e-09	5430407P10Rik	NM_144883	-	6019545	6051230	Genebody	28729.5	NA	NA	NA	NA
chr2	103407201	103409400	2Kb_3433	MDKO_M_1222	2200	26.65	11.24	Up	1.25	4.78e-07	6.89e-06	Abtb2	NM_178890	+	103406466	103558579	Promoter3k	1834.5	NA	NA	NA	NA
chr2	3251401	3253400	2Kb_3189	MDKO_M_1223	2000	24.97	10.21	Up	1.29	7.64e-07	1.06e-05	Acbd7	NM_030063	+	3253439	3258268	Promoter3k	-1038.5	NA	NA	NA	NA
chr2	31323501	31328500	5Kb_2044	MDKO_M_1224	5000	49.68	14.1	Up	1.82	3.32e-11	1.44e-09	Ass1	NM_007494	+	31325789	31376189	ProximalPromoter	211.5	NA	NA	NA	NA
chr2	34727001	34740000	10Kb_1516	MDKO_M_1225	13000	130.04	40.99	Up	1.67	8.64e-12	1.6e-09	D730039F16Rik	NM_030021	+	34729955	34747652	Genebody	3545.5	NA	NA	NA	NA
chr2	104580801	104582200	1kb_3976	MDKO_M_1226	1400	16.63	4.52	Up	1.88	7.25e-08	1.81e-06	Depdc7	NM_144804	-	104561943	104582957	Promoter3k	1456.5	NA	NA	NA	NA
chr2	24937601	24939800	2Kb_3230	MDKO_M_1227	2200	26.11	8.17	Up	1.68	4.47e-08	7.88e-07	Entpd8	NM_028093	+	24935842	24941238	Promoter3k	2858.5	NA	NA	NA	NA
chr2	34683001	34685000	2Kb_3293	MDKO_M_1228	2000	21.41	7.8	Up	1.46	3.19e-06	3.9e-05	Fbxw2	NM_001164772	-	34666680	34681754	Promoter3k	-2246.5	NA	NA	NA	NA
chr2	118106301	118107400	1kb_4017	MDKO_M_1229	1100	14.59	5.1	Up	1.52	3.3e-05	0.000415421	Gpr176	NM_201367	-	118102845	118199046	Genebody	92195.5	NA	NA	NA	NA
chr2	68699601	68701600	2Kb_3361	MDKO_M_1231	2000	24.62	7.49	Up	1.72	5.13e-08	8.91e-07	Lass6	NM_172856	+	68699613	68949346	Promoter1k	987.5	NA	NA	NA	NA
chr2	109757001	109762000	5Kb_2170	MDKO_M_1232	5000	49.61	16.57	Up	1.58	1.15e-12	1.15e-09	Lgr4	NM_172671	+	109757803	109854413	Promoter3k	1697.5	NA	NA	NA	NA
chr2	91292001	91304000	10Kb_1571	MDKO_M_1233	12000	122.89	51.53	Up	1.25	1.58e-11	1.6e-09	Lrp4	NM_001145857	+	91297687	91319443	Promoter1k	313.5	NA	NA	NA	NA
chr2	25945501	25952000	5Kb_2021	MDKO_M_1235	6500	64.85	27.27	Up	1.25	3.11e-12	1.15e-09	Nacc2	NM_026495	-	25911055	25978330	Genebody	29579.5	NA	NA	NA	NA
chr2	121954801	121956800	2Kb_3495	MDKO_M_1236	2000	25.42	12.04	Up	1.08	8.48e-06	9.42e-05	Patl2	NM_026251	-	121945843	122011924	Genebody	56123.5	NA	NA	NA	NA
chr2	24323801	24325800	2Kb_3229	MDKO_M_1237	2000	23.83	10.59	Up	1.17	3.58e-05	0.000337446	Pax8	NM_011040	-	24276079	24331085	Genebody	6284.5	NA	NA	NA	NA
chr2	84832601	84834600	2Kb_3394	MDKO_M_1238	2000	22.59	10.19	Up	1.15	3.34e-05	0.000318555	Prg3	NM_016914	+	84828371	84834042	Genebody	5229.5	NA	NA	NA	NA
chr2	130452001	130469000	10Kb_1632	MDKO_M_1239	17000	159.14	63.58	Up	1.32	8.46e-10	1.13e-08	Prosapip1	NM_197945	-	130458574	130468538	Genebody	8037.5	NA	NA	NA	NA
chr2	72059001	72064000	5Kb_2114	MDKO_M_1240	5000	46.47	14.13	Up	1.72	3.75e-10	8.3e-09	Rapgef4	NM_019688	+	71819343	72094432	Genebody	242158	NA	NA	NA	NA
chr2	126369001	126388000	10Kb_1622	MDKO_M_1241	19000	186.79	53.34	Up	1.81	4.32e-11	1.6e-09	Slc27a2	NM_011978	+	126378759	126413978	Promoter1k	-258.5	NA	NA	NA	NA
chr2	166122001	166128000	5Kb_2290	MDKO_M_1242	6000	58.24	28.74	Up	1.02	7.07e-08	9.68e-07	0	0	0	0	0	OtherIntergenic	NA	NA	NA	NA	NA
chr2	72904801	72906000	1kb_3915	MDKO_M_1243	1200	23.24	11.3	Up	1.04	1.16e-05	0.00016743	0	0	0	0	0	OtherIntergenic	NA	NA	NA	NA	NA
chr2	167661501	167666500	5Kb_2297	MDKO_M_1244	5000	52.34	24.65	Up	1.09	1.21e-09	2.33e-08	0	0	0	0	0	OtherIntergenic	NA	NA	NA	NA	NA
chr2	28489001	28494000	5Kb_2029	MDKO_M_1245	5000	55.02	24.54	Up	1.16	3.23e-11	1.42e-09	0	0	0	0	0	OtherIntergenic	NA	NA	NA	NA	NA
chr2	94000501	94005500	5Kb_2145	MDKO_M_1246	5000	48.44	21.26	Up	1.19	8.65e-10	1.72e-08	0	0	0	0	0	OtherIntergenic	NA	NA	NA	NA	NA
chr2	101503301	101504300	1kb_3958	MDKO_M_1247	1000	14.97	5.94	Up	1.33	9.91e-05	0.00103664	0	0	0	0	0	OtherIntergenic	NA	NA	NA	NA	NA
chr2	149657101	149658200	1kb_4148	MDKO_M_1248	1100	23.54	11.17	Up	1.08	5.98e-06	9.39e-05	Tmem90b	NM_001085521	+	149656578	149830127	Promoter3k	1072.5	NA	NA	NA	NA
chr2	37557001	37558400	1kb_3831	MDKO_M_1249	1400	16.12	5.97	Up	1.43	6.71e-06	0.000104035	0	0	0	0	0	OtherIntergenic	NA	NA	NA	NA	NA
chr2	147840001	147882000	10Kb_1661	MDKO_M_1250	42000	595.43	217.25	Up	1.45	2.37e-10	3.84e-09	0	0	0	0	0	OtherIntergenic	NA	NA	NA	NA	NA
chr2	30373401	30374400	1kb_3778	MDKO_M_1251	1000	12.79	4.55	Up	1.49	8.21e-05	0.000892623	0	0	0	0	0	OtherIntergenic	NA	NA	NA	NA	NA
chr2	77654101	77655300	1kb_3927	MDKO_M_1252	1200	35.87	17.59	Up	1.03	1.56e-05	0.000216885	Zfp385b	NM_178723	-	77248688	77654872	ProximalPromoter	171.5	NA	NA	NA	NA
chr3	98643001	98644100	1kb_4467	MDKO_M_1253	1100	2.62	18.44	Down	-2.81	9.47e-10	3.91e-08	0	0	0	0	0	OtherIntergenic	NA	NA	NA	NA	NA
chr3	137522001	137523000	1kb_4584	MDKO_M_1254	1000	2.66	13.76	Down	-2.37	3.04e-08	8.24e-07	0	0	0	0	0	OtherIntergenic	NA	NA	NA	NA	NA
chr3	74248401	74250400	2Kb_3819	MDKO_M_1255	2000	4.62	23.13	Down	-2.32	3.86e-12	5.81e-10	0	0	0	0	0	Genedesert	NA	NA	NA	NA	NA
chr3	7642001	7650500	5Kb_2343	MDKO_M_1256	8500	18.79	88.08	Down	-2.23	4.16e-09	7.2e-08	0	0	0	0	0	OtherIntergenic	NA	NA	NA	NA	NA
chr3	7673201	7674200	1kb_4293	MDKO_M_1257	1000	3.7	16.52	Down	-2.16	1.2e-09	4.76e-08	0	0	0	0	0	OtherIntergenic	NA	NA	NA	NA	NA
chr3	119239801	119241800	2Kb_3953	MDKO_M_1258	2000	5.73	23.73	Down	-2.05	2.19e-11	1.24e-09	0	0	0	0	0	OtherIntergenic	NA	NA	NA	NA	NA
chr3	129099201	129100200	1kb_4569	MDKO_M_1259	1000	4.15	17.06	Down	-2.04	3.31e-08	8.87e-07	0	0	0	0	0	OtherIntergenic	NA	NA	NA	NA	NA
chr3	70200801	70203000	2Kb_3817	MDKO_M_1260	2200	6.98	27.94	Down	-2	5.74e-09	1.22e-07	0	0	0	0	0	Genedesert	NA	NA	NA	NA	NA
chr3	95886101	95887100	1kb_4444	MDKO_M_1261	1000	3.39	12.84	Down	-1.92	1.8e-06	3.24e-05	0	0	0	0	0	OtherIntergenic	NA	NA	NA	NA	NA
chr3	97484501	97485500	1kb_4456	MDKO_M_1262	1000	3.9	14.23	Down	-1.87	3.21e-07	6.97e-06	0	0	0	0	0	OtherIntergenic	NA	NA	NA	NA	NA
chr3	69438201	69440800	2Kb_3814	MDKO_M_1263	2600	8.53	30.77	Down	-1.85	2.76e-12	5.35e-10	0	0	0	0	0	OtherIntergenic	NA	NA	NA	NA	NA
chr3	9884301	9885300	1kb_4303	MDKO_M_1264	1000	3.73	13.34	Down	-1.84	1.94e-06	3.46e-05	0	0	0	0	0	OtherIntergenic	NA	NA	NA	NA	NA
chr3	74543801	74545800	2Kb_3820	MDKO_M_1265	2000	6.62	23.39	Down	-1.82	2.45e-08	4.59e-07	0	0	0	0	0	Genedesert	NA	NA	NA	NA	NA
chr3	7652001	7666000	10Kb_1739	MDKO_M_1266	14000	39.38	132.39	Down	-1.75	3e-10	4.64e-09	0	0	0	0	0	OtherIntergenic	NA	NA	NA	NA	NA
chr3	129066301	129067400	1kb_4568	MDKO_M_1267	1100	4.64	15.17	Down	-1.71	4.12e-07	8.75e-06	0	0	0	0	0	OtherIntergenic	NA	NA	NA	NA	NA
chr3	98709001	98751000	10Kb_1813	MDKO_M_1268	42000	164.78	524.63	Down	-1.67	1.75e-09	2.18e-08	0	0	0	0	0	OtherIntergenic	NA	NA	NA	NA	NA
chr3	98710001	98712200	2Kb_3896	MDKO_M_1269	2200	8.49	26.93	Down	-1.67	1.03e-10	3.71e-09	0	0	0	0	0	OtherIntergenic	NA	NA	NA	NA	NA
chr3	131975401	131977600	2Kb_3977	MDKO_M_1270	2200	8.92	26.69	Down	-1.58	1.86e-09	4.48e-08	0	0	0	0	0	OtherIntergenic	NA	NA	NA	NA	NA
chr3	148936801	148939200	2Kb_4030	MDKO_M_1271	2400	10	28.98	Down	-1.54	2.05e-09	4.89e-08	0	0	0	0	0	Genedesert	NA	NA	NA	NA	NA
chr3	119292201	119293700	1kb_4544	MDKO_M_1272	1500	6.96	20.09	Down	-1.53	2.67e-06	4.62e-05	0	0	0	0	0	OtherIntergenic	NA	NA	NA	NA	NA
chr3	77713001	77714400	1kb_4387	MDKO_M_1273	1400	5.82	16.69	Down	-1.52	2.31e-07	5.17e-06	0	0	0	0	0	Genedesert	NA	NA	NA	NA	NA
chr3	69666601	69667600	1kb_4384	MDKO_M_1274	1000	4.84	13.89	Down	-1.52	3.78e-05	0.000465957	0	0	0	0	0	OtherIntergenic	NA	NA	NA	NA	NA
chr3	98765001	98805000	10Kb_1814	MDKO_M_1275	40000	163.85	467.5	Down	-1.51	1.74e-09	2.16e-08	0	0	0	0	0	OtherIntergenic	NA	NA	NA	NA	NA
chr3	110465001	110482000	10Kb_1832	MDKO_M_1276	17000	60.62	171.35	Down	-1.5	2.18e-11	1.6e-09	0	0	0	0	0	Genedesert	NA	NA	NA	NA	NA
chr3	69450001	69453400	2Kb_3815	MDKO_M_1277	3400	15.21	42.82	Down	-1.49	2.54e-09	5.86e-08	0	0	0	0	0	OtherIntergenic	NA	NA	NA	NA	NA
chr2	115737601	115739600	2Kb_3468	MDKO_M_1191	2000	8.71	24.92	Down	-1.52	6.59e-09	1.38e-07	Meis2	NM_001159569	-	115686999	115890356	Genebody	151756	NA	NA	NA	NA
chr3	151513401	151514600	1kb_4650	MDKO_M_1279	1200	6.81	18.9	Down	-1.47	1.4e-05	0.000198274	0	0	0	0	0	OtherIntergenic	NA	NA	NA	NA	NA
chr3	119341801	119342900	1kb_4546	MDKO_M_1280	1100	5.41	14.95	Down	-1.47	5.97e-06	9.38e-05	0	0	0	0	0	OtherIntergenic	NA	NA	NA	NA	NA
chr3	142181001	142195000	10Kb_1860	MDKO_M_1281	14000	51.78	141.43	Down	-1.45	1.2e-11	1.6e-09	0	0	0	0	0	OtherIntergenic	NA	NA	NA	NA	NA
chr3	110451001	110464000	10Kb_1831	MDKO_M_1282	13000	51.65	141.31	Down	-1.45	1.78e-09	2.21e-08	0	0	0	0	0	Genedesert	NA	NA	NA	NA	NA
chr3	98752501	98758000	5Kb_2451	MDKO_M_1283	5500	22.57	61.25	Down	-1.44	1.83e-12	1.15e-09	0	0	0	0	0	OtherIntergenic	NA	NA	NA	NA	NA
chr3	97115601	97116700	1kb_4455	MDKO_M_1284	1100	6.51	17.64	Down	-1.44	2.9e-06	4.96e-05	0	0	0	0	0	OtherIntergenic	NA	NA	NA	NA	NA
chr3	119164001	119236000	10Kb_1837	MDKO_M_1285	72000	337.82	893.03	Down	-1.4	2.7e-10	4.29e-09	0	0	0	0	0	OtherIntergenic	NA	NA	NA	NA	NA
chr3	7599001	7639000	10Kb_1738	MDKO_M_1286	40000	195.92	513.68	Down	-1.39	1.18e-10	2.31e-09	0	0	0	0	0	OtherIntergenic	NA	NA	NA	NA	NA
chr3	7696401	7699000	2Kb_3735	MDKO_M_1287	2600	11.03	28.88	Down	-1.39	1.11e-06	1.5e-05	0	0	0	0	0	OtherIntergenic	NA	NA	NA	NA	NA
chr3	119894601	119896600	2Kb_3955	MDKO_M_1288	2000	10.69	27.71	Down	-1.37	2.53e-07	3.81e-06	0	0	0	0	0	Genedesert	NA	NA	NA	NA	NA
chr3	75230001	75232400	2Kb_3821	MDKO_M_1289	2400	9.6	24.59	Down	-1.36	4.13e-06	4.93e-05	0	0	0	0	0	OtherIntergenic	NA	NA	NA	NA	NA
chr3	104518701	104519700	1kb_4503	MDKO_M_1290	1000	6.59	16.85	Down	-1.36	4.11e-05	0.000499159	0	0	0	0	0	OtherIntergenic	NA	NA	NA	NA	NA
chr3	69433001	69435200	2Kb_3813	MDKO_M_1291	2200	9.88	25.17	Down	-1.35	1.35e-07	2.16e-06	0	0	0	0	0	OtherIntergenic	NA	NA	NA	NA	NA
chr2	115834001	115836000	2Kb_3469	MDKO_M_1192	2000	11.18	24	Down	-1.1	2.7e-05	0.000263315	Meis2	NM_001159569	-	115686999	115890356	Genebody	55355.5	NA	NA	NA	NA
chr7	86291001	86294400	2Kb_5437	MDKO_M_1842	3400	19.25	42.61	Down	-1.15	5.32e-08	9.22e-07	Mfge8	NM_001045489	-	86278653	86293945	Promoter3k	1244.5	NA	NA	NA	NA
chr3	7677501	7682500	5Kb_2345	MDKO_M_1294	5000	22.31	56.33	Down	-1.34	1.23e-08	1.92e-07	0	0	0	0	0	OtherIntergenic	NA	NA	NA	NA	NA
chr3	7684801	7686800	2Kb_3734	MDKO_M_1295	2000	9.41	23.6	Down	-1.33	1.44e-05	0.000151815	0	0	0	0	0	OtherIntergenic	NA	NA	NA	NA	NA
chr3	119294601	119296600	2Kb_3954	MDKO_M_1296	2000	9.71	23.89	Down	-1.3	2.29e-07	3.49e-06	0	0	0	0	0	OtherIntergenic	NA	NA	NA	NA	NA
chr3	121250701	121251700	1kb_4552	MDKO_M_1297	1000	6.86	16.62	Down	-1.28	7.04e-05	0.000787424	0	0	0	0	0	OtherIntergenic	NA	NA	NA	NA	NA
chr10	101619701	101620900	1kb_798	MDKO_M_257	1200	7.4	19.33	Down	-1.39	6.02e-06	9.44e-05	Mgat4c	NM_001162368	+	101621491	101854099	Promoter3k	-1190.5	NA	NA	NA	NA
chr3	69472001	69477000	5Kb_2395	MDKO_M_1300	5000	23.28	56.02	Down	-1.27	2.94e-11	1.38e-09	0	0	0	0	0	OtherIntergenic	NA	NA	NA	NA	NA
chr3	104861301	104862300	1kb_4510	MDKO_M_1301	1000	7.11	16.89	Down	-1.25	3.9e-05	0.000478771	0	0	0	0	0	OtherIntergenic	NA	NA	NA	NA	NA
chr3	119326401	119327600	1kb_4545	MDKO_M_1302	1200	7.1	16.8	Down	-1.24	1.58e-05	0.000218913	0	0	0	0	0	OtherIntergenic	NA	NA	NA	NA	NA
chr3	98846001	98860000	10Kb_1815	MDKO_M_1303	14000	61.3	143.96	Down	-1.23	2.23e-11	1.6e-09	0	0	0	0	0	OtherIntergenic	NA	NA	NA	NA	NA
chr3	50845401	50846400	1kb_4348	MDKO_M_1304	1000	6.91	16.1	Down	-1.22	6.26e-05	0.000714297	0	0	0	0	0	OtherIntergenic	NA	NA	NA	NA	NA
chr3	102331201	102333200	2Kb_3915	MDKO_M_1305	2000	9.44	21.88	Down	-1.21	2.08e-06	2.64e-05	0	0	0	0	0	OtherIntergenic	NA	NA	NA	NA	NA
chr3	38125501	38126500	1kb_4336	MDKO_M_1306	1000	9.23	21.33	Down	-1.21	9.41e-05	0.000994378	0	0	0	0	0	OtherIntergenic	NA	NA	NA	NA	NA
chr3	120078201	120079800	1kb_4548	MDKO_M_1307	1600	9.14	21.2	Down	-1.21	3.32e-06	5.58e-05	0	0	0	0	0	Genedesert	NA	NA	NA	NA	NA
chr3	96144501	96145900	1kb_4448	MDKO_M_1308	1400	8.76	20.16	Down	-1.2	4.1e-05	0.000498713	0	0	0	0	0	OtherIntergenic	NA	NA	NA	NA	NA
chr10	41192001	41206000	10Kb_245	MDKO_M_258	14000	64.55	141.81	Down	-1.14	1.18e-08	1.26e-07	Mical1	NM_001164433	+	41196119	41206833	Promoter3k	2881.5	NA	NA	NA	NA
chr3	62000401	62002400	2Kb_3801	MDKO_M_1310	2000	10.53	23.6	Down	-1.16	2.44e-06	3.06e-05	0	0	0	0	0	OtherIntergenic	NA	NA	NA	NA	NA
chr3	145870501	145871500	1kb_4636	MDKO_M_1311	1000	8.76	19.58	Down	-1.16	4.58e-05	0.000549267	0	0	0	0	0	OtherIntergenic	NA	NA	NA	NA	NA
chr3	29624001	29630500	5Kb_2357	MDKO_M_1312	6500	29.83	66.32	Down	-1.15	7.06e-12	1.15e-09	0	0	0	0	0	OtherIntergenic	NA	NA	NA	NA	NA
chr3	118058201	118060200	2Kb_3942	MDKO_M_1313	2000	10.36	22.6	Down	-1.13	4.48e-06	5.29e-05	0	0	0	0	0	OtherIntergenic	NA	NA	NA	NA	NA
chr3	78729601	78731600	2Kb_3822	MDKO_M_1314	2000	12.99	28.27	Down	-1.12	2.64e-06	3.29e-05	0	0	0	0	0	Genedesert	NA	NA	NA	NA	NA
chr3	95769501	95770500	1kb_4441	MDKO_M_1315	1000	7.79	16.97	Down	-1.12	7.64e-05	0.000840948	0	0	0	0	0	OtherIntergenic	NA	NA	NA	NA	NA
chr3	143915001	143944000	10Kb_1864	MDKO_M_1316	29000	142.18	307.45	Down	-1.11	2.14e-09	2.61e-08	0	0	0	0	0	OtherIntergenic	NA	NA	NA	NA	NA
chr5	140208501	140213500	5Kb_3020	MDKO_M_1619	5000	19.61	54.29	Down	-1.47	1.58e-12	1.15e-09	Micall2	NM_174850	-	140182646	140212286	Promoter3k	1285.5	NA	NA	NA	NA
chr3	51983401	51985400	2Kb_3789	MDKO_M_1318	2000	10.74	23.08	Down	-1.1	2.69e-05	0.000262103	0	0	0	0	0	OtherIntergenic	NA	NA	NA	NA	NA
chr4	87439401	87442000	2Kb_4233	MDKO_M_1485	2600	13.02	33.51	Down	-1.36	2.96e-07	4.43e-06	Mllt3	NM_029931	-	87415828	87452217	Genebody	11516.5	NA	NA	NA	NA
chr3	50780001	50812000	10Kb_1762	MDKO_M_1320	32000	171.13	358.9	Down	-1.07	2.06e-10	3.45e-09	0	0	0	0	0	OtherIntergenic	NA	NA	NA	NA	NA
chr3	65389401	65391400	2Kb_3802	MDKO_M_1321	2000	15.21	31.91	Down	-1.07	2.19e-05	0.000219546	0	0	0	0	0	OtherIntergenic	NA	NA	NA	NA	NA
chr3	96129101	96130100	1kb_4446	MDKO_M_1322	1000	13.07	27.38	Down	-1.07	5.38e-05	0.000629994	0	0	0	0	0	OtherIntergenic	NA	NA	NA	NA	NA
chr3	104560701	104561700	1kb_4504	MDKO_M_1323	1000	11.11	23.32	Down	-1.07	7.15e-05	0.000799361	0	0	0	0	0	OtherIntergenic	NA	NA	NA	NA	NA
chr3	142073001	142143000	10Kb_1859	MDKO_M_1324	70000	423.98	882.39	Down	-1.06	3.48e-10	5.27e-09	0	0	0	0	0	OtherIntergenic	NA	NA	NA	NA	NA
chr3	145566001	145586000	10Kb_1867	MDKO_M_1325	20000	107.21	222.92	Down	-1.06	8.87e-09	9.68e-08	0	0	0	0	0	OtherIntergenic	NA	NA	NA	NA	NA
chr3	37650001	37666000	10Kb_1756	MDKO_M_1326	16000	79.6	165.92	Down	-1.06	2.89e-11	1.6e-09	0	0	0	0	0	OtherIntergenic	NA	NA	NA	NA	NA
chr3	147887001	147892000	5Kb_2522	MDKO_M_1327	5000	26.29	55	Down	-1.06	2.36e-09	4.28e-08	0	0	0	0	0	Genedesert	NA	NA	NA	NA	NA
chr3	129830801	129833200	2Kb_3973	MDKO_M_1328	2400	14.08	29.26	Down	-1.06	1.4e-06	1.86e-05	0	0	0	0	0	OtherIntergenic	NA	NA	NA	NA	NA
chr3	147770201	147772200	2Kb_4028	MDKO_M_1329	2000	12.22	25.22	Down	-1.05	8.54e-05	0.000716109	0	0	0	0	0	Genedesert	NA	NA	NA	NA	NA
chr3	83090801	83092800	2Kb_3827	MDKO_M_1330	2000	11.65	24.14	Down	-1.05	1.23e-05	0.000131753	0	0	0	0	0	OtherIntergenic	NA	NA	NA	NA	NA
chr11	97522501	97523500	1kb_1306	MDKO_M_354	1000	2.48	15.33	Down	-2.63	1.62e-09	6.14e-08	Mllt6	NM_139311	+	97524725	97546771	Promoter3k	-1724.5	NA	NA	NA	NA
chr11	88505801	88509200	2Kb_1079	MDKO_M_355	3400	13.55	47.02	Down	-1.79	2.01e-11	1.18e-09	Msi2	NM_054043	-	88152883	88579542	Genebody	72041.5	NA	NA	NA	NA
chr11	88188001	88217000	10Kb_482	MDKO_M_356	29000	150.76	365.69	Down	-1.28	1.51e-10	2.72e-09	Msi2	NM_054043	-	88152883	88579542	Genebody	377042	NA	NA	NA	NA
chr3	96108001	96110000	2Kb_3877	MDKO_M_1334	2000	12.82	25.95	Down	-1.02	8.65e-05	0.000723436	0	0	0	0	0	OtherIntergenic	NA	NA	NA	NA	NA
chr3	53534001	53535200	1kb_4355	MDKO_M_1335	1200	10.95	22.16	Down	-1.02	3.07e-05	0.000390631	0	0	0	0	0	OtherIntergenic	NA	NA	NA	NA	NA
chr3	7706001	7712500	5Kb_2346	MDKO_M_1336	6500	33.36	67.12	Down	-1.01	2.09e-08	3.13e-07	0	0	0	0	0	OtherIntergenic	NA	NA	NA	NA	NA
chr3	19606001	19608400	2Kb_3744	MDKO_M_1337	2400	16.07	32.27	Down	-1.01	1.19e-06	1.6e-05	0	0	0	0	0	OtherIntergenic	NA	NA	NA	NA	NA
chr3	60558001	60571000	10Kb_1771	MDKO_M_1338	13000	61.68	123.27	Down	-1	3.57e-11	1.6e-09	0	0	0	0	0	OtherIntergenic	NA	NA	NA	NA	NA
chr11	88461001	88495000	10Kb_484	MDKO_M_357	34000	175.44	396.78	Down	-1.18	1.1e-10	2.2e-09	Msi2	NM_054043	-	88152883	88579542	Genebody	101542	NA	NA	NA	NA
chr8	113242001	113252000	10Kb_2776	MDKO_M_2058	10000	47.53	101.26	Down	-1.09	6.47e-12	1.6e-09	Mtss1l	NM_198625	+	113245383	113265299	Promoter3k	1617.5	NA	NA	NA	NA
chr9	59630401	59631400	1kb_7337	MDKO_M_2177	1000	3.55	14	Down	-1.98	5.26e-08	1.36e-06	Myo9a	NM_173018	+	59598980	59776670	Genebody	31920.5	NA	NA	NA	NA
chr9	59596001	59626000	10Kb_2906	MDKO_M_2178	30000	110.8	347.4	Down	-1.65	6.51e-10	9.04e-09	Myo9a	NM_173018	+	59598980	59776670	Genebody	12020.5	NA	NA	NA	NA
chr9	120219701	120220700	1kb_7632	MDKO_M_2179	1000	5.66	15.32	Down	-1.44	3.91e-05	0.000478771	Myrip	NM_144557	+	120213190	120383951	Genebody	7010.5	NA	NA	NA	NA
chr9	120248001	120271000	10Kb_2992	MDKO_M_2180	23000	125.37	257.73	Down	-1.04	1.83e-07	1.68e-06	Myrip	NM_144557	+	120213190	120383951	Genebody	46310.5	NA	NA	NA	NA
chr9	49417001	49418000	1kb_7230	MDKO_M_2181	1000	4.81	13.94	Down	-1.54	9.41e-06	0.00013965	Ncam1	NM_010875	-	49323243	49607173	Genebody	189672	NA	NA	NA	NA
chr2	126957801	126958800	1kb_4043	MDKO_M_1193	1000	5.78	15.26	Down	-1.4	6.41e-05	0.000728343	Ncaph	NM_144818	-	126929564	126959638	Promoter3k	1337.5	NA	NA	NA	NA
chr1	128486701	128487700	1kb_278	MDKO_M_103	1000	4.37	13.44	Down	-1.62	4.37e-06	7.11e-05	Nckap5	NM_001081756	-	127810212	128727208	Genebody	240008	NA	NA	NA	NA
chr1	128465201	128467200	2Kb_251	MDKO_M_104	2000	10.06	23.8	Down	-1.24	5.65e-07	8.03e-06	Nckap5	NM_001081756	-	127810212	128727208	Genebody	261008	NA	NA	NA	NA
chr1	128493001	128561000	10Kb_116	MDKO_M_105	68000	360.05	824.28	Down	-1.19	2.57e-10	4.12e-09	Nckap5	NM_001081756	-	127810212	128727208	Genebody	200208	NA	NA	NA	NA
chr10	30517001	30531000	10Kb_232	MDKO_M_259	14000	58.21	137.03	Down	-1.24	4.8e-10	6.93e-09	Ncoa7	NM_172495	-	30365387	30522912	Promoter3k	-1088.5	NA	NA	NA	NA
chr2	31111201	31113200	2Kb_3262	MDKO_M_1194	2000	12.88	27.16	Down	-1.08	9.64e-05	0.000793913	Ncs1	NM_019681	+	31101442	31150990	Genebody	10758.5	NA	NA	NA	NA
chr18	65044001	65046600	2Kb_2884	MDKO_M_992	2600	11.52	35.45	Down	-1.62	7.44e-12	7.3e-10	Nedd4l	NM_001114386	+	65047409	65377479	Promoter3k	-2108.5	NA	NA	NA	NA
chr13	3915401	3917400	2Kb_1534	MDKO_M_563	2000	10.85	26.46	Down	-1.29	3.3e-05	0.000315634	Net1	NM_019671	-	3881808	3917465	Promoter3k	1064.5	NA	NA	NA	NA
chr17	45693101	45694100	1kb_3052	MDKO_M_898	1000	4.25	14.33	Down	-1.76	2.89e-06	4.95e-05	Nfkbie	NM_008690	+	45692664	45700116	Promoter1k	936.5	NA	NA	NA	NA
chr5	73037701	73038700	1kb_5309	MDKO_M_1620	1000	11.02	22.63	Down	-1.04	4.09e-05	0.00049768	Nipal1	NM_001081205	+	73039034	73062316	Promoter1k	-833.5	NA	NA	NA	NA
chr17	74857101	74858400	1kb_3110	MDKO_M_899	1300	6.11	16.4	Down	-1.42	1.13e-05	0.000164167	Nlrc4	NM_001033367	-	74825634	74858447	Promoter1k	696.5	NA	NA	NA	NA
chr7	27213001	27231000	10Kb_2463	MDKO_M_1812	18000	49.53	186.3	Down	-1.91	3.05e-11	1.6e-09	Nlrp4a	NM_172896	+	27220131	27260476	Promoter3k	1869.5	NA	NA	NA	NA
chr7	27165001	27172500	5Kb_3300	MDKO_M_1810	7500	12.56	76.5	Down	-2.61	1.13e-12	1.15e-09	Nlrp9c	NM_001042612	-	27149905	27179261	Genebody	10510.5	NA	NA	NA	NA
chr5	118395501	118396700	1kb_5463	MDKO_M_1621	1200	7.11	17.48	Down	-1.3	1.22e-05	0.000174459	Nos1	NM_008712	+	118317127	118403819	Genebody	78973.5	NA	NA	NA	NA
chr5	118388501	118389500	1kb_5462	MDKO_M_1622	1000	6.83	16.55	Down	-1.28	4.09e-05	0.000497586	Nos1	NM_008712	+	118317127	118403819	Genebody	71873.5	NA	NA	NA	NA
chr1	155394801	155398400	2Kb_330	MDKO_M_106	3600	21.09	46.61	Down	-1.14	2.57e-07	3.87e-06	Npl	NM_028749	-	155350145	155396843	ProximalPromoter	242.5	NA	NA	NA	NA
chr3	132600501	132601500	1kb_4580	MDKO_M_1362	1000	5.58	13.76	Down	-1.3	6.72e-05	0.000758138	Npnt	NM_033525	-	132545658	132613254	Genebody	12253.5	NA	NA	NA	NA
chr15	101095601	101098600	2Kb_2262	MDKO_M_739	3000	16.3	40.4	Down	-1.31	1.47e-09	3.65e-08	Nr4a1	NM_010444	+	101097276	101105222	ProximalPromoter	-175.5	NA	NA	NA	NA
chr19	56431001	56433600	2Kb_3146	MDKO_M_1069	2600	13.51	30.49	Down	-1.17	2.12e-06	2.69e-05	Nrap	NM_008733	-	56394531	56464524	Genebody	32223.5	NA	NA	NA	NA
chr9	88211001	88262000	10Kb_2944	MDKO_M_2182	51000	333.15	753.36	Down	-1.18	3.11e-10	4.77e-09	Nt5e	NM_011851	+	88222446	88266926	Genebody	14054.5	NA	NA	NA	NA
chr9	29264401	29265500	1kb_7128	MDKO_M_2183	1100	5.26	15.48	Down	-1.56	9.28e-06	0.00013794	Ntm	NM_172290	-	28803548	29770713	Genebody	505762	NA	NA	NA	NA
chr9	29293801	29294800	1kb_7133	MDKO_M_2184	1000	4.66	13.69	Down	-1.55	7.43e-06	0.000113628	Ntm	NM_172290	-	28803548	29770713	Genebody	476412	NA	NA	NA	NA
chr9	29436101	29437500	1kb_7134	MDKO_M_2185	1400	7.93	20.86	Down	-1.4	5.17e-07	1.07e-05	Ntm	NM_172290	-	28803548	29770713	Genebody	333912	NA	NA	NA	NA
chr9	29267001	29293000	10Kb_2826	MDKO_M_2186	26000	126.64	282.48	Down	-1.16	1.36e-10	2.53e-09	Ntm	NM_172290	-	28803548	29770713	Genebody	490712	NA	NA	NA	NA
chr13	59064801	59067000	2Kb_1722	MDKO_M_564	2200	13.28	27.1	Down	-1.03	3.39e-06	4.12e-05	Ntrk2	NM_001025074	+	58909193	59231327	Genebody	156708	NA	NA	NA	NA
chr7	28043601	28045800	2Kb_5325	MDKO_M_1815	2200	11.68	30.07	Down	-1.36	5.1e-08	8.85e-07	Numbl	NM_010950	+	28043779	28067168	Promoter1k	921.5	NA	NA	NA	NA
chr7	139754001	139786000	10Kb_2593	MDKO_M_1885	32000	199.61	420.06	Down	-1.07	1.04e-10	2.13e-09	Oat	NM_016978	-	139749157	139768080	Promoter3k	-1920.5	NA	NA	NA	NA
chr19	47612001	47614000	2Kb_3127	MDKO_M_1070	2000	11.53	25.16	Down	-1.13	1.79e-05	0.000182889	Obfc1	NM_175360	-	47575537	47611509	Promoter3k	-1491.5	NA	NA	NA	NA
chr11	36492701	36493700	1kb_968	MDKO_M_358	1000	6.86	16.18	Down	-1.24	1.13e-05	0.000164167	Odz2	NM_011856	-	35820170	36757744	Genebody	264544	NA	NA	NA	NA
chr11	35831001	35833000	2Kb_835	MDKO_M_359	2000	11.39	25.3	Down	-1.15	1.6e-06	2.08e-05	Odz2	NM_011856	-	35820170	36757744	Genebody	925744	NA	NA	NA	NA
chr11	36034001	36036000	2Kb_838	MDKO_M_360	2000	11.85	25.07	Down	-1.08	1.81e-05	0.000185208	Odz2	NM_011856	-	35820170	36757744	Genebody	722744	NA	NA	NA	NA
chr7	103913701	103914700	1kb_6353	MDKO_M_1849	1000	6.23	14.87	Down	-1.26	8.79e-05	0.000939663	Odz4	NM_011858	+	103359146	104057063	Genebody	555054	NA	NA	NA	NA
chr1	172572901	172573900	1kb_438	MDKO_M_107	1000	5.2	14.24	Down	-1.45	1.46e-05	0.000204665	Olfml2b	NM_177068	+	172574662	172612919	Promoter3k	-1261.5	NA	NA	NA	NA
chr3	130319801	130321300	1kb_4575	MDKO_M_1379	1500	15.64	5.33	Up	1.55	1.09e-05	0.00015946	Agxt2l1	NM_027907	+	130320492	130338665	ProximalPromoter	58.5	NA	NA	NA	NA
chr3	94163001	94174000	10Kb_1801	MDKO_M_1380	11000	106.29	37.58	Up	1.5	5.6e-12	1.6e-09	C2cd4d	NM_001136117	+	94166365	94168487	Promoter3k	2135.5	NA	NA	NA	NA
chr3	157587001	157592500	5Kb_2530	MDKO_M_1382	5500	55.19	17.45	Up	1.66	1.45e-12	1.15e-09	Cth	NM_145953	-	157557211	157588026	Promoter3k	-1724.5	NA	NA	NA	NA
chr3	85688001	85693000	5Kb_2404	MDKO_M_1383	5000	49.88	23.15	Up	1.11	3.43e-09	6.01e-08	Glt28d2	NM_177130	-	85673767	85691439	Promoter1k	938.5	NA	NA	NA	NA
chr3	96320001	96341000	10Kb_1808	MDKO_M_1384	21000	229.67	115.2	Up	1	6.23e-11	1.68e-09	Hfe2	NM_027126	+	96329107	96333138	Promoter3k	1393.5	NA	NA	NA	NA
chr3	89409201	89411400	2Kb_3856	MDKO_M_1385	2200	27.23	12.35	Up	1.14	5.42e-06	6.3e-05	Kcnn3	NM_080466	+	89324085	89476415	Genebody	86215.5	NA	NA	NA	NA
chr3	58809401	58810600	1kb_4364	MDKO_M_1386	1200	21.36	9.9	Up	1.11	0.000286588	0.00294888	Med12l	NM_177855	+	58810899	59122331	Promoter1k	-898.5	NA	NA	NA	NA
chr3	97880501	97885500	5Kb_2444	MDKO_M_1387	5000	54.81	20.19	Up	1.44	2.16e-09	3.95e-08	Notch2	NM_010928	+	97817460	97954289	Genebody	65540.5	NA	NA	NA	NA
chr3	97874501	97875600	1kb_4460	MDKO_M_1388	1100	14.2	3.41	Up	2.06	3.68e-07	7.89e-06	Notch2	NM_010928	+	97817460	97954289	Genebody	57590.5	NA	NA	NA	NA
chr3	97624501	97629500	5Kb_2443	MDKO_M_1389	5000	56.38	20.58	Up	1.45	1.72e-12	1.15e-09	Pde4dip	NM_177145	-	97626010	97672234	Genebody	45233.5	NA	NA	NA	NA
chr3	97671401	97672800	1kb_4458	MDKO_M_1390	1400	22.32	7.16	Up	1.64	1.21e-06	2.3e-05	Pde4dip	NM_177145	-	97626010	97672234	ProximalPromoter	133.5	NA	NA	NA	NA
chr3	80839801	80841800	2Kb_3824	MDKO_M_1391	2000	29.37	14.57	Up	1.01	8.06e-05	0.000681363	Pdgfc	NM_019971	+	80840337	81017952	Promoter1k	463.5	NA	NA	NA	NA
chr3	88939901	88941000	1kb_4416	MDKO_M_1392	1100	14.36	3.62	Up	1.99	2.77e-07	6.1e-06	Pklr	NM_013631	+	88940063	88950515	Promoter1k	387.5	NA	NA	NA	NA
chr3	88938201	88939300	1kb_4415	MDKO_M_1393	1100	13.8	3.26	Up	2.08	9.2e-08	2.24e-06	Pklr	NM_013631	+	88940063	88950515	Promoter3k	-1312.5	NA	NA	NA	NA
chr3	121230001	121241000	10Kb_1839	MDKO_M_1394	11000	107.9	53.4	Up	1.01	1.37e-11	1.6e-09	Slc44a3	NM_145394	-	121162446	121235261	ProximalPromoter	-239.5	NA	NA	NA	NA
chr3	121186201	121187200	1kb_4550	MDKO_M_1395	1000	13.94	5.48	Up	1.35	9.73e-05	0.00102204	Slc44a3	NM_145394	-	121162446	121235261	Genebody	48560.5	NA	NA	NA	NA
chr3	5207001	5223000	10Kb_1735	MDKO_M_1397	16000	164.78	79.68	Up	1.05	3.28e-08	3.3e-07	0	0	0	0	0	OtherIntergenic	NA	NA	NA	NA	NA
chr3	127542801	127544800	2Kb_3965	MDKO_M_1398	2000	23.64	10.88	Up	1.12	1.79e-05	0.000182981	0	0	0	0	0	OtherIntergenic	NA	NA	NA	NA	NA
chr3	94216001	94217300	1kb_4434	MDKO_M_1399	1300	16.56	5.15	Up	1.68	2.18e-06	3.84e-05	Tdrkh	NM_028307	+	94217239	94235420	Promoter1k	-588.5	NA	NA	NA	NA
chr3	94634501	94641500	5Kb_2431	MDKO_M_1400	7000	72.98	32.33	Up	1.17	2.01e-09	3.71e-08	0	0	0	0	0	OtherIntergenic	NA	NA	NA	NA	NA
chr3	96218201	96220200	2Kb_3879	MDKO_M_1401	2000	22.08	7.47	Up	1.56	6.68e-08	1.13e-06	Terc	NR_001579	-	96218359	96218755	Promoter1k	-445.5	NA	NA	NA	NA
chr3	88935601	88937800	2Kb_3850	MDKO_M_1402	2200	26.33	10.37	Up	1.34	1.7e-07	2.67e-06	0	0	0	0	0	OtherIntergenic	NA	NA	NA	NA	NA
chr3	120957001	120974000	10Kb_1838	MDKO_M_1403	17000	157.83	56.92	Up	1.47	2.13e-10	3.53e-09	Tmem56	NM_178936	-	120904927	120966233	Promoter1k	732.5	NA	NA	NA	NA
chr3	131149001	131159000	10Kb_1854	MDKO_M_1404	10000	98.43	34.72	Up	1.5	1.02e-11	1.6e-09	0	0	0	0	0	OtherIntergenic	NA	NA	NA	NA	NA
chr4	91170501	91171500	1kb_4902	MDKO_M_1405	1000	2.74	13.3	Down	-2.28	6.09e-09	1.96e-07	0	0	0	0	0	OtherIntergenic	NA	NA	NA	NA	NA
chr4	71302001	71307500	5Kb_2626	MDKO_M_1406	5500	17.04	64.34	Down	-1.92	8.45e-09	1.38e-07	0	0	0	0	0	Genedesert	NA	NA	NA	NA	NA
chr4	71288401	71290600	2Kb_4208	MDKO_M_1407	2200	7.38	26.11	Down	-1.82	4.33e-11	1.9e-09	0	0	0	0	0	Genedesert	NA	NA	NA	NA	NA
chr5	136645601	136647800	2Kb_4861	MDKO_M_1623	2200	7.81	27.56	Down	-1.82	1.88e-10	6.12e-09	Orai2	NM_178751	-	136623331	136646525	ProximalPromoter	-175.5	NA	NA	NA	NA
chr4	154524601	154525700	1kb_5134	MDKO_M_1409	1100	4.45	14.71	Down	-1.72	4.72e-06	7.61e-05	0	0	0	0	0	OtherIntergenic	NA	NA	NA	NA	NA
chr4	71459001	71478000	10Kb_1946	MDKO_M_1410	19000	66.15	209.78	Down	-1.67	1.29e-11	1.6e-09	0	0	0	0	0	Genedesert	NA	NA	NA	NA	NA
chr4	26392001	26395200	2Kb_4088	MDKO_M_1411	3200	11.13	35.33	Down	-1.67	8.51e-10	2.26e-08	0	0	0	0	0	Genedesert	NA	NA	NA	NA	NA
chr4	72709801	72713000	2Kb_4213	MDKO_M_1412	3200	14.42	45.3	Down	-1.65	5.69e-09	1.21e-07	0	0	0	0	0	Genedesert	NA	NA	NA	NA	NA
chr4	91165501	91166500	1kb_4901	MDKO_M_1413	1000	3.98	12.27	Down	-1.63	4.93e-06	7.89e-05	0	0	0	0	0	OtherIntergenic	NA	NA	NA	NA	NA
chr4	71268001	71278000	10Kb_1945	MDKO_M_1414	10000	34.07	99.9	Down	-1.55	5.64e-12	1.6e-09	0	0	0	0	0	Genedesert	NA	NA	NA	NA	NA
chr4	71497501	71506500	5Kb_2628	MDKO_M_1415	9000	32.95	95.91	Down	-1.54	7.93e-10	1.6e-08	0	0	0	0	0	Genedesert	NA	NA	NA	NA	NA
chr4	154609401	154611600	2Kb_4480	MDKO_M_1416	2200	9.01	25.71	Down	-1.51	2.97e-09	6.72e-08	0	0	0	0	0	OtherIntergenic	NA	NA	NA	NA	NA
chr4	11769001	11837000	10Kb_1882	MDKO_M_1417	68000	359.19	1009.01	Down	-1.49	4.31e-08	4.28e-07	0	0	0	0	0	OtherIntergenic	NA	NA	NA	NA	NA
chr4	22126001	22181000	10Kb_1888	MDKO_M_1418	55000	231.88	649.78	Down	-1.49	1.43e-10	2.62e-09	0	0	0	0	0	OtherIntergenic	NA	NA	NA	NA	NA
chr4	55476701	55478100	1kb_4774	MDKO_M_1419	1400	7.78	21.64	Down	-1.48	7.51e-08	1.87e-06	0	0	0	0	0	OtherIntergenic	NA	NA	NA	NA	NA
chr4	103447601	103448600	1kb_4929	MDKO_M_1420	1000	4.98	13.76	Down	-1.47	5.42e-05	0.000633003	0	0	0	0	0	Genedesert	NA	NA	NA	NA	NA
chr4	108111301	108112300	1kb_4945	MDKO_M_1421	1000	5.67	15.17	Down	-1.42	1.27e-05	0.000182045	0	0	0	0	0	OtherIntergenic	NA	NA	NA	NA	NA
chr4	71183601	71187000	2Kb_4206	MDKO_M_1422	3400	15.72	40.69	Down	-1.37	3.87e-11	1.76e-09	0	0	0	0	0	Genedesert	NA	NA	NA	NA	NA
chr4	93006901	93007900	1kb_4903	MDKO_M_1423	1000	5.93	15.31	Down	-1.37	5.39e-05	0.000631183	0	0	0	0	0	OtherIntergenic	NA	NA	NA	NA	NA
chr4	103977001	103978000	1kb_4932	MDKO_M_1424	1000	5.63	14.52	Down	-1.37	2.31e-05	0.000304571	0	0	0	0	0	Genedesert	NA	NA	NA	NA	NA
chr4	102327001	102328000	1kb_4922	MDKO_M_1425	1000	5.55	14.41	Down	-1.37	2.31e-05	0.000304571	0	0	0	0	0	OtherIntergenic	NA	NA	NA	NA	NA
chr4	22849001	22888000	10Kb_1892	MDKO_M_1426	39000	174.54	447.64	Down	-1.36	1.16e-10	2.27e-09	0	0	0	0	0	Genedesert	NA	NA	NA	NA	NA
chr4	108252001	108253100	1kb_4947	MDKO_M_1486	1100	6.94	16.77	Down	-1.27	4.09e-05	0.000497586	Orc1l	NM_011015	+	108252058	108287435	Promoter1k	492.5	NA	NA	NA	NA
chr4	103754001	103756000	2Kb_4273	MDKO_M_1428	2000	9.51	24.19	Down	-1.35	2.19e-07	3.34e-06	0	0	0	0	0	Genedesert	NA	NA	NA	NA	NA
chr4	140424001	140425000	1kb_5099	MDKO_M_1429	1000	6.27	15.94	Down	-1.35	1.14e-05	0.000165685	0	0	0	0	0	OtherIntergenic	NA	NA	NA	NA	NA
chr4	122564001	122631000	10Kb_1989	MDKO_M_1430	67000	384.2	973.83	Down	-1.34	2.55e-08	2.62e-07	0	0	0	0	0	OtherIntergenic	NA	NA	NA	NA	NA
chr4	103328801	103329800	1kb_4926	MDKO_M_1431	1000	5.67	14.35	Down	-1.34	2.31e-05	0.000304571	0	0	0	0	0	Genedesert	NA	NA	NA	NA	NA
chr15	3990501	3995500	5Kb_1264	MDKO_M_740	5000	24.36	52.51	Down	-1.11	7.84e-11	2.36e-09	Oxct1	NM_024188	+	3976427	4105343	Genebody	16573.5	NA	NA	NA	NA
chr4	134574201	134575200	1kb_5046	MDKO_M_1433	1000	7.75	19.09	Down	-1.3	3.19e-05	0.000403728	0	0	0	0	0	OtherIntergenic	NA	NA	NA	NA	NA
chr4	55913501	55920500	5Kb_2597	MDKO_M_1434	7000	30.68	74.89	Down	-1.29	6.87e-10	1.41e-08	0	0	0	0	0	Genedesert	NA	NA	NA	NA	NA
chr4	32284101	32285300	1kb_4720	MDKO_M_1435	1200	8.59	21.04	Down	-1.29	2.02e-05	0.000271241	0	0	0	0	0	OtherIntergenic	NA	NA	NA	NA	NA
chr4	72769001	72774500	5Kb_2629	MDKO_M_1436	5500	24.93	60.6	Down	-1.28	2.24e-10	5.45e-09	0	0	0	0	0	Genedesert	NA	NA	NA	NA	NA
chr4	133154201	133156400	2Kb_4384	MDKO_M_1437	2200	12.69	30.52	Down	-1.27	7.87e-08	1.31e-06	0	0	0	0	0	OtherIntergenic	NA	NA	NA	NA	NA
chr4	57790501	57798500	5Kb_2610	MDKO_M_1438	8000	40.31	95.26	Down	-1.24	5.48e-11	1.91e-09	0	0	0	0	0	OtherIntergenic	NA	NA	NA	NA	NA
chr4	63256301	63257300	1kb_4832	MDKO_M_1439	1000	5.83	13.58	Down	-1.22	9.79e-05	0.00102569	0	0	0	0	0	OtherIntergenic	NA	NA	NA	NA	NA
chr4	135689801	135691800	2Kb_4401	MDKO_M_1440	2000	11.88	27.41	Down	-1.21	2.13e-07	3.27e-06	0	0	0	0	0	OtherIntergenic	NA	NA	NA	NA	NA
chr4	105074001	105085000	10Kb_1964	MDKO_M_1441	11000	53.02	122.2	Down	-1.2	5.75e-11	1.65e-09	0	0	0	0	0	Genedesert	NA	NA	NA	NA	NA
chr4	119406001	119412500	5Kb_2686	MDKO_M_1442	6500	31.22	71.06	Down	-1.19	1.3e-11	1.17e-09	0	0	0	0	0	OtherIntergenic	NA	NA	NA	NA	NA
chr4	155450201	155452600	2Kb_4487	MDKO_M_1443	2400	19.19	43.81	Down	-1.19	7.5e-08	1.26e-06	0	0	0	0	0	OtherIntergenic	NA	NA	NA	NA	NA
chr4	48784401	48786600	2Kb_4133	MDKO_M_1444	2200	15.68	35.72	Down	-1.19	1.52e-05	0.000158367	0	0	0	0	0	OtherIntergenic	NA	NA	NA	NA	NA
chr4	131988201	131989300	1kb_5027	MDKO_M_1445	1100	7.32	16.73	Down	-1.19	8.37e-05	0.000905746	0	0	0	0	0	OtherIntergenic	NA	NA	NA	NA	NA
chr4	108120801	108123400	2Kb_4292	MDKO_M_1446	2600	16.69	37.3	Down	-1.16	3.69e-07	5.45e-06	0	0	0	0	0	OtherIntergenic	NA	NA	NA	NA	NA
chr15	41277601	41278600	1kb_2426	MDKO_M_741	1000	7.79	20.53	Down	-1.4	4.66e-05	0.000556803	Oxr1	NM_001130166	+	41279027	41692592	Promoter1k	-926.5	NA	NA	NA	NA
chr4	103874001	103879500	5Kb_2657	MDKO_M_1448	5500	26.69	59.25	Down	-1.15	3.36e-09	5.91e-08	0	0	0	0	0	Genedesert	NA	NA	NA	NA	NA
chr4	106760601	106762800	2Kb_4284	MDKO_M_1449	2200	13.19	29.06	Down	-1.14	1.56e-06	2.04e-05	0	0	0	0	0	OtherIntergenic	NA	NA	NA	NA	NA
chr4	103730801	103733000	2Kb_4272	MDKO_M_1450	2200	12.46	27.19	Down	-1.13	1.21e-05	0.000128976	0	0	0	0	0	Genedesert	NA	NA	NA	NA	NA
chr11	53914901	53915900	1kb_1039	MDKO_M_361	1000	7.69	18.72	Down	-1.28	7.82e-05	0.000857548	P4ha2	NM_001136076	+	53914425	53945168	Promoter1k	975.5	NA	NA	NA	NA
chr4	139434001	139436200	2Kb_4425	MDKO_M_1452	2200	13.78	30.05	Down	-1.12	3.34e-07	4.96e-06	0	0	0	0	0	OtherIntergenic	NA	NA	NA	NA	NA
chr4	103434401	103436400	2Kb_4270	MDKO_M_1453	2000	11.55	25.03	Down	-1.12	3.26e-06	3.98e-05	0	0	0	0	0	Genedesert	NA	NA	NA	NA	NA
chr9	108498201	108501400	2Kb_6491	MDKO_M_2187	3200	16.54	41.94	Down	-1.34	4.05e-10	1.18e-08	P4htm	NM_028944	-	108481156	108499930	ProximalPromoter	129.5	NA	NA	NA	NA
chr4	22071001	22125000	10Kb_1887	MDKO_M_1455	54000	291.91	631.66	Down	-1.11	3.05e-09	3.63e-08	0	0	0	0	0	OtherIntergenic	NA	NA	NA	NA	NA
chr4	48693001	48694100	1kb_4758	MDKO_M_1456	1100	7.96	17.15	Down	-1.11	6.17e-05	0.000706908	0	0	0	0	0	OtherIntergenic	NA	NA	NA	NA	NA
chr4	139969401	139971600	2Kb_4440	MDKO_M_1457	2200	12.35	26.53	Down	-1.1	2.06e-05	0.00020802	0	0	0	0	0	OtherIntergenic	NA	NA	NA	NA	NA
chr4	123777801	123779800	2Kb_4347	MDKO_M_1458	2000	14.91	31.38	Down	-1.07	2.25e-05	0.000225315	0	0	0	0	0	OtherIntergenic	NA	NA	NA	NA	NA
chr4	152114001	152119500	5Kb_2794	MDKO_M_1459	5500	29.13	60.44	Down	-1.05	1.19e-09	2.3e-08	0	0	0	0	0	OtherIntergenic	NA	NA	NA	NA	NA
chr4	140334801	140336800	2Kb_4446	MDKO_M_1460	2000	12.58	25.78	Down	-1.04	2.21e-05	0.000221025	0	0	0	0	0	OtherIntergenic	NA	NA	NA	NA	NA
chr4	56058001	56103000	10Kb_1931	MDKO_M_1461	45000	251.17	512.95	Down	-1.03	1.2e-10	2.34e-09	0	0	0	0	0	Genedesert	NA	NA	NA	NA	NA
chr4	56178001	56191000	10Kb_1932	MDKO_M_1462	13000	71.38	146.21	Down	-1.03	2.82e-08	2.86e-07	0	0	0	0	0	Genedesert	NA	NA	NA	NA	NA
chr4	103714001	103721000	5Kb_2656	MDKO_M_1463	7000	33.34	68.26	Down	-1.03	2.27e-10	5.5e-09	0	0	0	0	0	Genedesert	NA	NA	NA	NA	NA
chr4	9062601	9065000	2Kb_4048	MDKO_M_1464	2400	18.84	38.36	Down	-1.03	9.41e-07	1.29e-05	0	0	0	0	0	OtherIntergenic	NA	NA	NA	NA	NA
chr1	62092601	62094800	2Kb_92	MDKO_M_108	2200	8.96	24.81	Down	-1.47	1.8e-08	3.47e-07	Pard3b	NM_001081050	+	61685397	62688857	Genebody	408304	NA	NA	NA	NA
chr4	103340501	103346500	5Kb_2654	MDKO_M_1466	6000	33.89	68.54	Down	-1.02	7.15e-06	7.17e-05	0	0	0	0	0	Genedesert	NA	NA	NA	NA	NA
chr4	103771401	103773600	2Kb_4274	MDKO_M_1467	2200	12.63	25.68	Down	-1.02	1.5e-05	0.00015668	0	0	0	0	0	Genedesert	NA	NA	NA	NA	NA
chr4	133005001	133007000	2Kb_4381	MDKO_M_1468	2000	13.29	26.82	Down	-1.01	2.1e-05	0.000211985	0	0	0	0	0	OtherIntergenic	NA	NA	NA	NA	NA
chr4	55505001	55719000	10Kb_1924	MDKO_M_1469	214000	1544.45	3082.35	Down	-1	2.5e-09	3.01e-08	0	0	0	0	0	Genedesert	NA	NA	NA	NA	NA
chr4	103302201	103305400	2Kb_4267	MDKO_M_1470	3200	19.39	38.67	Down	-1	1.49e-07	2.36e-06	0	0	0	0	0	Genedesert	NA	NA	NA	NA	NA
chr4	3878601	3881600	2Kb_4043	MDKO_M_1471	3000	17.73	35.41	Down	-1	6.06e-07	8.58e-06	0	0	0	0	0	OtherIntergenic	NA	NA	NA	NA	NA
chr17	11207001	11243000	10Kb_1151	MDKO_M_900	36000	186.07	495.4	Down	-1.41	1.65e-09	2.07e-08	Park2	NM_016694	+	11033249	12256225	Genebody	191752	NA	NA	NA	NA
chr5	91985801	91988000	2Kb_4656	MDKO_M_1624	2200	11.03	27.73	Down	-1.33	3.54e-07	5.25e-06	Parm1	NM_145562	+	91946725	92053021	Genebody	40175.5	NA	NA	NA	NA
chr9	59483001	59484000	1kb_7320	MDKO_M_2188	1000	3.48	12.62	Down	-1.86	6.53e-07	1.31e-05	Parp6	NM_029922	+	59465090	59498075	Genebody	18410.5	NA	NA	NA	NA
chr1	170309501	170317500	5Kb_230	MDKO_M_109	8000	38.71	86.86	Down	-1.17	2.28e-09	4.16e-08	Pbx1	NM_183355	-	170083999	170362388	Genebody	48887.5	NA	NA	NA	NA
chr2	34224801	34227200	2Kb_3290	MDKO_M_1195	2400	11.57	28.5	Down	-1.3	2.1e-08	3.98e-07	Pbx3	NM_016768	-	34027428	34227555	Promoter3k	1554.5	NA	NA	NA	NA
chr2	34134501	34135900	1kb_3808	MDKO_M_1196	1400	7.08	17.43	Down	-1.3	6.91e-06	0.000106689	Pbx3	NM_016768	-	34027428	34227555	Genebody	92354.5	NA	NA	NA	NA
chr14	88866801	88868800	2Kb_1972	MDKO_M_660	2000	11.51	25.95	Down	-1.17	1.83e-06	2.37e-05	Pcdh20	NM_178685	-	88864555	88871202	Genebody	3401.5	NA	NA	NA	NA
chr14	93471001	93473800	2Kb_1973	MDKO_M_661	2800	10.47	38.23	Down	-1.87	3.57e-11	1.68e-09	Pcdh9	NM_001081377	-	93412919	94287950	Genebody	815550	NA	NA	NA	NA
chr18	37324401	37325400	1kb_3231	MDKO_M_993	1000	5.88	13.76	Down	-1.23	5.42e-05	0.000633003	Pcdhac2	NM_001003672	+	37303622	37347310	Genebody	21278.5	NA	NA	NA	NA
chr16	96689401	96691400	2Kb_2489	MDKO_M_836	2000	14.73	29.51	Down	-1	7.31e-05	0.00062549	Pcp4	NM_008791	+	96689212	96747399	Promoter3k	1188.5	NA	NA	NA	NA
chr17	9031701	9032700	1kb_2917	MDKO_M_901	1000	6.24	14.89	Down	-1.26	8.79e-05	0.000939663	Pde10a	NM_011866	+	8994609	9179512	Genebody	37591.5	NA	NA	NA	NA
chr6	141444201	141445200	1kb_6043	MDKO_M_1746	1000	5.19	13.63	Down	-1.39	2.87e-05	0.00036772	Pde3a	NM_018779	+	141197789	141447871	Genebody	246912	NA	NA	NA	NA
chr9	20985201	20986900	1kb_7094	MDKO_M_2189	1700	7.96	20.41	Down	-1.36	1.15e-06	2.2e-05	Pde4a	NM_183408	+	20970157	21017691	Genebody	15893.5	NA	NA	NA	NA
chr4	102039801	102042200	2Kb_4265	MDKO_M_1487	2400	14.59	31.16	Down	-1.09	1.03e-05	0.000112127	Pde4b	NM_019840	+	101927543	102279866	Genebody	113458	NA	NA	NA	NA
chr13	109828901	109829900	1kb_2086	MDKO_M_565	1000	4.73	13.16	Down	-1.48	4.92e-05	0.000583571	Pde4d	NM_011056	+	109444370	110741681	Genebody	385030	NA	NA	NA	NA
chr13	109497801	109500400	2Kb_1793	MDKO_M_566	2600	12.12	31.85	Down	-1.39	9.29e-10	2.43e-08	Pde4d	NM_011056	+	109444370	110741681	Genebody	54730.5	NA	NA	NA	NA
chr13	109510801	109514600	2Kb_1794	MDKO_M_567	3800	21.11	49.71	Down	-1.24	2.47e-09	5.71e-08	Pde4d	NM_011056	+	109444370	110741681	Genebody	68330.5	NA	NA	NA	NA
chr3	97692801	97693900	1kb_4459	MDKO_M_1363	1100	11.26	23.74	Down	-1.08	1.14e-05	0.000165685	Pde4dip	NM_001039376	-	97493751	97692629	Promoter1k	-721.5	NA	NA	NA	NA
chr13	55598201	55600200	2Kb_1709	MDKO_M_568	2000	12.86	26.18	Down	-1.03	1.53e-05	0.000159473	Pdlim7	NM_001114088	-	55598847	55614799	Genebody	15598.5	NA	NA	NA	NA
chr15	12304201	12306200	2Kb_2072	MDKO_M_742	2000	12.57	27.58	Down	-1.13	2.32e-06	2.93e-05	Pdzd2	NM_001081064	-	12286808	12522310	Genebody	217110	NA	NA	NA	NA
chr15	92424801	92425800	1kb_2600	MDKO_M_743	1000	5.35	13.09	Down	-1.29	6.84e-05	0.000768003	Pdzrn4	NM_001164593	+	92227240	92602249	Genebody	198060	NA	NA	NA	NA
chr11	106539701	106540800	1kb_1396	MDKO_M_362	1100	3.7	16.49	Down	-2.16	6.15e-09	1.98e-07	Pecam1	NM_008816	-	106515531	106576594	Genebody	36343.5	NA	NA	NA	NA
chr11	106519001	106524000	5Kb_735	MDKO_M_363	5000	15.05	61.87	Down	-2.04	2.57e-12	1.15e-09	Pecam1	NM_008816	-	106515531	106576594	Genebody	55093.5	NA	NA	NA	NA
chr5	64483801	64487000	2Kb_4591	MDKO_M_1625	3200	10	38.16	Down	-1.93	5.37e-13	5e-10	Pgm1	NM_025700	+	64484188	64519396	Promoter3k	1212.5	NA	NA	NA	NA
chr13	42994401	42996600	2Kb_1625	MDKO_M_569	2200	11.51	24.07	Down	-1.06	4.36e-06	5.17e-05	Phactr1	NM_001005740	+	42804949	43233880	Genebody	190552	NA	NA	NA	NA
chr4	132592501	132597500	5Kb_2728	MDKO_M_1497	5000	49.2	22.52	Up	1.13	1.65e-09	3.11e-08	Ahdc1	NM_146155	+	132567420	132634024	Genebody	27580.5	NA	NA	NA	NA
chr4	132564801	132567200	2Kb_4376	MDKO_M_1498	2400	31.19	14.08	Up	1.15	1.25e-06	1.67e-05	Ahdc1	NM_146155	+	132567420	132634024	Promoter3k	-1419.5	NA	NA	NA	NA
chr4	41436001	41458000	10Kb_1899	MDKO_M_1499	22000	265.03	129.95	Up	1.03	4.89e-10	7.04e-09	AI464131	NM_001085515	-	41442636	41450108	Genebody	3107.5	NA	NA	NA	NA
chr4	101089501	101096500	5Kb_2652	MDKO_M_1500	7000	78.04	27.11	Up	1.53	8.08e-09	1.32e-07	Ak3l1	NM_009647	+	101092363	101139599	Promoter1k	637.5	NA	NA	NA	NA
chr4	140787001	140812000	10Kb_2050	MDKO_M_1501	25000	324.2	126.16	Up	1.36	9.48e-11	2.02e-09	Arhgef19	NM_172520	+	140798798	140813476	Promoter1k	702.5	NA	NA	NA	NA
chr4	135763001	135765400	2Kb_4402	MDKO_M_1502	2400	29.41	12.68	Up	1.21	1.09e-05	0.000118146	Asap3	NM_001008232	+	135762279	135802487	Promoter3k	1921.5	NA	NA	NA	NA
chr4	135788001	135814000	10Kb_2027	MDKO_M_1503	26000	298.36	103.31	Up	1.53	3.83e-09	4.44e-08	Asap3	NM_001008232	+	135762279	135802487	Genebody	38721.5	NA	NA	NA	NA
chr4	8165501	8166800	1kb_4660	MDKO_M_1505	1300	16.33	3.03	Up	2.43	4.19e-07	8.88e-06	Car8	NM_007592	-	8068639	8166187	ProximalPromoter	36.5	NA	NA	NA	NA
chr4	57928201	57930400	2Kb_4185	MDKO_M_1507	2200	25.75	8.41	Up	1.61	2.35e-09	5.46e-08	D630039A03Rik	NM_178727	-	57921255	57929135	ProximalPromoter	-165.5	NA	NA	NA	NA
chr4	115680001	115699000	10Kb_1980	MDKO_M_1511	19000	191.4	71.93	Up	1.41	4e-11	1.6e-09	Faah	NM_010173	-	115669260	115690506	Promoter3k	1005.5	NA	NA	NA	NA
chr4	140922001	140927000	5Kb_2773	MDKO_M_1512	5000	65.67	32.35	Up	1.02	1.22e-07	1.6e-06	Fam131c	NM_001085513	+	140924134	140940089	Promoter1k	366.5	NA	NA	NA	NA
chr4	95633401	95635600	2Kb_4250	MDKO_M_1513	2200	34.11	9.05	Up	1.91	7.93e-10	2.13e-08	Hook1	NM_030014	+	95634069	95690964	Promoter1k	431.5	NA	NA	NA	NA
chr4	139664401	139665400	1kb_5086	MDKO_M_1514	1000	23.88	11.28	Up	1.08	6.51e-05	0.00073853	Igsf21	NM_198610	-	139582766	139802698	Genebody	137798	NA	NA	NA	NA
chr4	135282001	135288000	5Kb_2744	MDKO_M_1515	6000	61.84	29.26	Up	1.08	1.69e-11	1.2e-09	Il22ra1	NM_178257	+	135284134	135307279	Promoter1k	866.5	NA	NA	NA	NA
chr4	106133001	106139000	5Kb_2660	MDKO_M_1517	6000	60.92	21.63	Up	1.49	3.2e-12	1.15e-09	Pcsk9	NM_153565	-	106114938	106136929	Promoter1k	928.5	NA	NA	NA	NA
chr4	104779001	104786500	5Kb_2658	MDKO_M_1518	7500	84.91	38.57	Up	1.14	9.02e-09	1.46e-07	Prkaa2	NM_178143	-	104702254	104782502	ProximalPromoter	-248.5	NA	NA	NA	NA
chr4	154695001	154697200	2Kb_4481	MDKO_M_1519	2200	25.08	10.54	Up	1.25	1.73e-06	2.25e-05	Prkcz	NM_001039079	-	154634228	154719880	Genebody	23779.5	NA	NA	NA	NA
chr4	154711001	154727000	10Kb_2071	MDKO_M_1520	16000	157.21	64.51	Up	1.29	2.64e-11	1.6e-09	Prkcz	NM_001039079	-	154634228	154719880	Promoter1k	879.5	NA	NA	NA	NA
chr4	154732501	154737500	5Kb_2799	MDKO_M_1521	5000	70.87	22.31	Up	1.67	4.31e-10	9.34e-09	Prkcz	NM_008860	-	154634228	154735499	Promoter1k	498.5	NA	NA	NA	NA
chr4	117961401	117963600	2Kb_4324	MDKO_M_1523	2200	32.22	9.16	Up	1.81	3.47e-11	1.65e-09	Ptprf	NM_011213	-	117880817	117964001	Promoter3k	1500.5	NA	NA	NA	NA
chr4	149743001	149748000	5Kb_2789	MDKO_M_1524	5000	47.28	14.48	Up	1.71	9.07e-13	1.15e-09	Rere	NM_001085492	+	149656024	149996074	Genebody	89476.5	NA	NA	NA	NA
chr4	118779201	118781200	2Kb_4328	MDKO_M_1525	2000	21.96	10.69	Up	1.04	7.85e-05	0.000665125	Slc2a1	NM_011400	+	118781349	118809933	Promoter3k	-1148.5	NA	NA	NA	NA
chr4	138476501	138477500	1kb_5080	MDKO_M_1526	1000	14.69	5.53	Up	1.41	3.91e-05	0.000478771	0	0	0	0	0	OtherIntergenic	NA	NA	NA	NA	NA
chr4	150034601	150037800	2Kb_4471	MDKO_M_1527	3200	37.62	13.2	Up	1.51	8.46e-09	1.72e-07	0	0	0	0	0	OtherIntergenic	NA	NA	NA	NA	NA
chr4	154970301	154971400	1kb_5139	MDKO_M_1528	1100	14.36	4.22	Up	1.77	1.52e-06	2.8e-05	0	0	0	0	0	OtherIntergenic	NA	NA	NA	NA	NA
chr4	102648701	102650000	1kb_4924	MDKO_M_1529	1300	18.2	4.41	Up	2.05	2e-08	5.66e-07	0	0	0	0	0	OtherIntergenic	NA	NA	NA	NA	NA
chr5	146189501	146196000	5Kb_3028	MDKO_M_1531	6500	14.84	69.91	Down	-2.24	1.14e-12	1.15e-09	0	0	0	0	0	OtherIntergenic	NA	NA	NA	NA	NA
chr5	122595001	122597000	2Kb_4789	MDKO_M_1532	2000	5.95	24.91	Down	-2.07	2.23e-10	7.1e-09	0	0	0	0	0	OtherIntergenic	NA	NA	NA	NA	NA
chr5	146170501	146175500	5Kb_3027	MDKO_M_1533	5000	15.38	60.34	Down	-1.97	1.02e-12	1.15e-09	0	0	0	0	0	OtherIntergenic	NA	NA	NA	NA	NA
chr5	49361701	49362700	1kb_5265	MDKO_M_1534	1000	3.33	12.64	Down	-1.92	1.29e-06	2.42e-05	0	0	0	0	0	Genedesert	NA	NA	NA	NA	NA
chr5	135048001	135049000	1kb_5589	MDKO_M_1535	1000	3.23	12.05	Down	-1.9	1.01e-05	0.000149056	0	0	0	0	0	OtherIntergenic	NA	NA	NA	NA	NA
chr5	16781001	16805000	10Kb_2079	MDKO_M_1536	24000	75.37	259.89	Down	-1.79	4.64e-11	1.6e-09	0	0	0	0	0	OtherIntergenic	NA	NA	NA	NA	NA
chr13	42807001	42808200	1kb_1880	MDKO_M_570	1200	10.58	21.94	Down	-1.05	3.04e-05	0.000387447	Phactr1	NM_001005740	+	42804949	43233880	Promoter3k	2651.5	NA	NA	NA	NA
chr2	34761001	34777000	10Kb_1517	MDKO_M_1197	16000	66.09	145.51	Down	-1.14	2.12e-11	1.6e-09	Phf19	NM_028716	-	34749274	34769495	Promoter1k	494.5	NA	NA	NA	NA
chr5	146639601	146640600	1kb_5639	MDKO_M_1539	1000	4.42	14.04	Down	-1.67	1.67e-06	3.03e-05	0	0	0	0	0	OtherIntergenic	NA	NA	NA	NA	NA
chr4	115894601	115896600	2Kb_4316	MDKO_M_1488	2000	12.54	25.55	Down	-1.03	1.73e-05	0.000178033	Pik3r3	NM_181585	+	115894518	115975660	Promoter3k	1082.5	NA	NA	NA	NA
chr5	127405001	127460000	10Kb_2233	MDKO_M_1541	55000	218.19	651.93	Down	-1.58	1.94e-10	3.29e-09	0	0	0	0	0	Genedesert	NA	NA	NA	NA	NA
chr19	4100001	4102200	2Kb_2949	MDKO_M_1071	2200	13.17	28.13	Down	-1.1	7.09e-07	9.91e-06	Pitpnm1	NM_008851	+	4100621	4113960	Promoter1k	479.5	NA	NA	NA	NA
chr5	46835501	46836600	1kb_5262	MDKO_M_1543	1100	6.65	19.43	Down	-1.55	5.7e-07	1.17e-05	0	0	0	0	0	Genedesert	NA	NA	NA	NA	NA
chr5	39600001	39619000	10Kb_2117	MDKO_M_1544	19000	67.34	194.31	Down	-1.53	8.55e-11	1.91e-09	0	0	0	0	0	OtherIntergenic	NA	NA	NA	NA	NA
chr5	138159901	138160900	1kb_5615	MDKO_M_1545	1000	5.41	15.64	Down	-1.53	1.25e-06	2.36e-05	0	0	0	0	0	OtherIntergenic	NA	NA	NA	NA	NA
chr5	52980601	52982600	2Kb_4583	MDKO_M_1546	2000	7.92	22.73	Down	-1.52	2.95e-08	5.41e-07	0	0	0	0	0	OtherIntergenic	NA	NA	NA	NA	NA
chr5	127215101	127216100	1kb_5516	MDKO_M_1547	1000	5.47	15.1	Down	-1.47	5.58e-05	0.000648633	0	0	0	0	0	Genedesert	NA	NA	NA	NA	NA
chr1	137814501	137815500	1kb_331	MDKO_M_110	1000	12.13	24.21	Down	-1	6.9e-05	0.000774277	Pkp1	NM_019645	-	137767971	137815600	Promoter1k	599.5	NA	NA	NA	NA
chr17	43748601	43750800	2Kb_2615	MDKO_M_902	2200	12.23	27.1	Down	-1.15	4.72e-07	6.82e-06	Pla2g7	NM_013737	+	43705399	43749149	Genebody	44301.5	NA	NA	NA	NA
chr5	150055601	150059000	2Kb_4918	MDKO_M_1550	3400	14.95	40.48	Down	-1.44	8.31e-12	7.59e-10	0	0	0	0	0	OtherIntergenic	NA	NA	NA	NA	NA
chr3	27834401	27837400	2Kb_3749	MDKO_M_1364	3000	17.73	38.86	Down	-1.13	1.82e-06	2.35e-05	Pld1	NM_001164056	+	27837601	28032283	Promoter3k	-1700.5	NA	NA	NA	NA
chr5	32724601	32725900	1kb_5220	MDKO_M_1552	1300	7.04	19.06	Down	-1.44	2.81e-06	4.84e-05	0	0	0	0	0	OtherIntergenic	NA	NA	NA	NA	NA
chr8	26203001	26222000	10Kb_2661	MDKO_M_2059	19000	85.26	193.42	Down	-1.18	3.5e-11	1.6e-09	Plekha2	NM_031257	-	26149618	26212282	ProximalPromoter	-218.5	NA	NA	NA	NA
chr5	48719201	48720200	1kb_5264	MDKO_M_1554	1000	4.96	13.3	Down	-1.42	2.33e-05	0.00030661	0	0	0	0	0	OtherIntergenic	NA	NA	NA	NA	NA
chr5	23329901	23330900	1kb_5173	MDKO_M_1555	1000	6.02	15.83	Down	-1.4	8.28e-05	0.00089862	0	0	0	0	0	OtherIntergenic	NA	NA	NA	NA	NA
chr5	123830001	123833400	2Kb_4790	MDKO_M_1556	3400	16.16	42.3	Down	-1.39	2.43e-11	1.3e-09	0	0	0	0	0	OtherIntergenic	NA	NA	NA	NA	NA
chr5	73788801	73790300	1kb_5317	MDKO_M_1557	1500	8.76	22.74	Down	-1.38	1.11e-07	2.66e-06	0	0	0	0	0	OtherIntergenic	NA	NA	NA	NA	NA
chr5	123836501	123843000	5Kb_2977	MDKO_M_1558	6500	25.02	64.44	Down	-1.36	8.89e-12	1.15e-09	0	0	0	0	0	OtherIntergenic	NA	NA	NA	NA	NA
chr7	52785401	52786400	1kb_6193	MDKO_M_1823	1000	5.47	15.37	Down	-1.49	7.47e-06	0.000114181	Plekha4	NM_148927	+	52781699	52809598	Genebody	4201.5	NA	NA	NA	NA
chr5	52110301	52111600	1kb_5267	MDKO_M_1560	1300	6.78	17.35	Down	-1.35	1.16e-05	0.000168382	0	0	0	0	0	OtherIntergenic	NA	NA	NA	NA	NA
chr5	138661301	138662300	1kb_5617	MDKO_M_1561	1000	5.35	13.67	Down	-1.35	9.79e-05	0.00102569	0	0	0	0	0	OtherIntergenic	NA	NA	NA	NA	NA
chr5	137102601	137105000	2Kb_4862	MDKO_M_1562	2400	11.76	29.63	Down	-1.33	2.67e-06	3.32e-05	0	0	0	0	0	OtherIntergenic	NA	NA	NA	NA	NA
chr5	96377201	96379800	2Kb_4662	MDKO_M_1563	2600	11.81	29.21	Down	-1.31	4.55e-08	8e-07	0	0	0	0	0	OtherIntergenic	NA	NA	NA	NA	NA
chr5	49675901	49676900	1kb_5266	MDKO_M_1564	1000	6.01	14.79	Down	-1.3	6.06e-05	0.000696398	0	0	0	0	0	Genedesert	NA	NA	NA	NA	NA
chr5	29080601	29082600	2Kb_4536	MDKO_M_1565	2000	10.39	25.37	Down	-1.29	2.74e-06	3.41e-05	0	0	0	0	0	OtherIntergenic	NA	NA	NA	NA	NA
chr5	151009701	151011200	1kb_5677	MDKO_M_1566	1500	9.68	23.44	Down	-1.28	3.24e-07	7.02e-06	0	0	0	0	0	OtherIntergenic	NA	NA	NA	NA	NA
chr5	4718201	4720400	2Kb_4489	MDKO_M_1567	2200	11.34	27.17	Down	-1.26	6.63e-08	1.12e-06	0	0	0	0	0	OtherIntergenic	NA	NA	NA	NA	NA
chr5	106854901	106855900	1kb_5411	MDKO_M_1568	1000	5.95	14.25	Down	-1.26	6.4e-05	0.000727623	0	0	0	0	0	OtherIntergenic	NA	NA	NA	NA	NA
chr5	101985401	101988200	2Kb_4678	MDKO_M_1569	2800	15.06	35.9	Down	-1.25	2.02e-09	4.81e-08	0	0	0	0	0	OtherIntergenic	NA	NA	NA	NA	NA
chr9	65425201	65428200	2Kb_6354	MDKO_M_2190	3000	8.43	39.31	Down	-2.22	7.62e-09	1.56e-07	Plekho2	NM_153119	-	65402190	65427840	Promoter3k	1139.5	NA	NA	NA	NA
chr11	97798601	97799800	1kb_1307	MDKO_M_364	1200	8.17	19.57	Down	-1.26	0.000711671	0.00729131	Plxdc1	NM_001163608	-	97784550	97847759	Genebody	48558.5	NA	NA	NA	NA
chr6	89313001	89315000	2Kb_5119	MDKO_M_1747	2000	10.58	26.19	Down	-1.31	2.78e-06	3.45e-05	Plxna1	NM_008881	-	89266309	89312606	Promoter3k	-1394.5	NA	NA	NA	NA
chr5	137608301	137609400	1kb_5608	MDKO_M_1573	1100	6.99	16.47	Down	-1.24	4.09e-05	0.000497586	0	0	0	0	0	OtherIntergenic	NA	NA	NA	NA	NA
chr10	94267501	94272500	5Kb_408	MDKO_M_260	5000	27.93	57.01	Down	-1.03	5e-09	8.5e-08	Plxnc1	NM_018797	-	94253611	94407211	Genebody	137210	NA	NA	NA	NA
chr6	115934001	115953000	10Kb_2398	MDKO_M_1748	19000	93.72	214.16	Down	-1.19	1.31e-10	2.47e-09	Plxnd1	NM_026376	-	115904828	115945022	Promoter3k	1521.5	NA	NA	NA	NA
chr5	97390401	97393200	2Kb_4664	MDKO_M_1576	2800	15.24	35.32	Down	-1.21	3.1e-07	4.62e-06	0	0	0	0	0	OtherIntergenic	NA	NA	NA	NA	NA
chr5	124308401	124310600	2Kb_4800	MDKO_M_1577	2200	12.21	28.01	Down	-1.2	1.05e-06	1.43e-05	0	0	0	0	0	OtherIntergenic	NA	NA	NA	NA	NA
chr5	44723001	44745000	10Kb_2123	MDKO_M_1578	22000	107.54	245.7	Down	-1.19	5.77e-11	1.65e-09	0	0	0	0	0	OtherIntergenic	NA	NA	NA	NA	NA
chr5	88825801	88828000	2Kb_4643	MDKO_M_1579	2200	12.24	27.93	Down	-1.19	3.61e-07	5.34e-06	0	0	0	0	0	OtherIntergenic	NA	NA	NA	NA	NA
chr5	116203001	116236000	10Kb_2210	MDKO_M_1580	33000	166.3	377.89	Down	-1.18	6.12e-10	8.55e-09	0	0	0	0	0	OtherIntergenic	NA	NA	NA	NA	NA
chr5	23532001	23563000	10Kb_2087	MDKO_M_1581	31000	155.34	350.41	Down	-1.17	6.06e-11	1.67e-09	0	0	0	0	0	OtherIntergenic	NA	NA	NA	NA	NA
chr17	29017501	29018600	1kb_2979	MDKO_M_903	1100	8.93	20.58	Down	-1.21	2e-05	0.000268731	Pnpla1	NM_001034885	+	28995355	29027252	Genebody	22695.5	NA	NA	NA	NA
chr6	88794901	88795900	1kb_5904	MDKO_M_1749	1000	5.49	14.52	Down	-1.4	2.31e-05	0.000304571	Podxl2	NM_176973	-	88792551	88824037	Genebody	28636.5	NA	NA	NA	NA
chr5	23458801	23461200	2Kb_4518	MDKO_M_1584	2400	16.11	35.53	Down	-1.14	6.37e-07	8.99e-06	0	0	0	0	0	OtherIntergenic	NA	NA	NA	NA	NA
chr5	23355001	23419000	10Kb_2085	MDKO_M_1585	64000	382.59	834.75	Down	-1.13	3.07e-10	4.73e-09	0	0	0	0	0	OtherIntergenic	NA	NA	NA	NA	NA
chr5	39529001	39559000	10Kb_2116	MDKO_M_1586	30000	150.61	328.63	Down	-1.13	5.78e-10	8.12e-09	0	0	0	0	0	OtherIntergenic	NA	NA	NA	NA	NA
chr5	106528001	106586000	10Kb_2190	MDKO_M_1587	58000	319.22	687.13	Down	-1.11	2.44e-10	3.93e-09	0	0	0	0	0	OtherIntergenic	NA	NA	NA	NA	NA
chr5	36079001	36085500	5Kb_2845	MDKO_M_1588	6500	35.64	76.73	Down	-1.11	4.18e-09	7.22e-08	0	0	0	0	0	OtherIntergenic	NA	NA	NA	NA	NA
chr5	99707601	99710200	2Kb_4671	MDKO_M_1589	2600	14.17	30.67	Down	-1.11	1.27e-07	2.03e-06	0	0	0	0	0	OtherIntergenic	NA	NA	NA	NA	NA
chr5	119575401	119577400	2Kb_4766	MDKO_M_1590	2000	12.06	25.92	Down	-1.1	2.41e-06	3.03e-05	0	0	0	0	0	OtherIntergenic	NA	NA	NA	NA	NA
chr5	99640601	99642600	2Kb_4667	MDKO_M_1591	2000	11.66	24.82	Down	-1.09	3.3e-06	4.02e-05	0	0	0	0	0	OtherIntergenic	NA	NA	NA	NA	NA
chr12	3959001	3961200	2Kb_1280	MDKO_M_474	2200	12.75	28.14	Down	-1.14	3.74e-06	4.5e-05	Pomc	NM_008895	+	3954950	3960617	Genebody	5150.5	NA	NA	NA	NA
chr16	38361301	38362300	1kb_2776	MDKO_M_837	1000	8.02	17.57	Down	-1.13	7.04e-05	0.000787041	Popdc2	NM_001081984	+	38362258	38378299	Promoter1k	-457.5	NA	NA	NA	NA
chr5	24130401	24132400	2Kb_4528	MDKO_M_1594	2000	14.87	30.83	Down	-1.05	1.58e-05	0.00016403	0	0	0	0	0	OtherIntergenic	NA	NA	NA	NA	NA
chr3	54162001	54167000	5Kb_2381	MDKO_M_1365	5000	27.78	56.34	Down	-1.02	5.29e-06	5.44e-05	Postn	NM_015784	+	54165046	54194953	Promoter1k	-545.5	NA	NA	NA	NA
chr5	107464201	107466800	2Kb_4711	MDKO_M_1596	2600	16.67	34.33	Down	-1.04	3.89e-06	4.66e-05	0	0	0	0	0	OtherIntergenic	NA	NA	NA	NA	NA
chr5	147164201	147166600	2Kb_4895	MDKO_M_1597	2400	14.49	29.78	Down	-1.04	6.6e-07	9.28e-06	0	0	0	0	0	OtherIntergenic	NA	NA	NA	NA	NA
chr6	115427201	115429200	2Kb_5182	MDKO_M_1750	2000	8.31	25.25	Down	-1.6	9.54e-09	1.93e-07	Pparg	NM_011146	+	115372083	115440418	Genebody	56117.5	NA	NA	NA	NA
chr6	115373601	115375600	2Kb_5181	MDKO_M_1751	2000	10.5	25.43	Down	-1.28	4.52e-07	6.55e-06	Pparg	NM_011146	+	115372083	115440418	Promoter3k	2517.5	NA	NA	NA	NA
chr10	122238601	122241000	2Kb_729	MDKO_M_261	2400	13.1	26.27	Down	-1	2.59e-05	0.000254618	Ppm1h	NM_176919	+	122115817	122359029	Genebody	123984	NA	NA	NA	NA
chr5	44717601	44718600	1kb_5257	MDKO_M_1601	1000	9.69	19.77	Down	-1.03	7.45e-05	0.000824164	0	0	0	0	0	OtherIntergenic	NA	NA	NA	NA	NA
chr5	97405001	97419000	10Kb_2171	MDKO_M_1602	14000	73.94	149.5	Down	-1.02	1.02e-08	1.1e-07	0	0	0	0	0	OtherIntergenic	NA	NA	NA	NA	NA
chr5	138164001	138166800	2Kb_4871	MDKO_M_1603	2800	16.12	32.64	Down	-1.02	5.43e-07	7.73e-06	0	0	0	0	0	OtherIntergenic	NA	NA	NA	NA	NA
chr5	89283001	89285200	2Kb_4644	MDKO_M_1604	2200	14.05	28.49	Down	-1.02	3.52e-06	4.27e-05	0	0	0	0	0	OtherIntergenic	NA	NA	NA	NA	NA
chr5	68265001	68302000	10Kb_2142	MDKO_M_1605	37000	215.43	434.07	Down	-1.01	1.25e-10	2.39e-09	0	0	0	0	0	OtherIntergenic	NA	NA	NA	NA	NA
chr6	4851801	4855200	2Kb_4927	MDKO_M_1752	3400	21.64	44.5	Down	-1.04	4.15e-08	7.37e-07	Ppp1r9a	NM_181595	+	4853319	5115660	ProximalPromoter	181.5	NA	NA	NA	NA
chr5	102860601	102863600	2Kb_4694	MDKO_M_1607	3000	18.37	36.98	Down	-1.01	3.03e-07	4.52e-06	0	0	0	0	0	OtherIntergenic	NA	NA	NA	NA	NA
chr11	94842001	94863000	10Kb_495	MDKO_M_365	21000	101.99	246.14	Down	-1.27	3.06e-11	1.6e-09	Ppp1r9b	NM_172261	+	94852525	94868211	ProximalPromoter	-24.5	NA	NA	NA	NA
chr18	42940201	42941300	1kb_3259	MDKO_M_994	1100	5.19	18.57	Down	-1.84	7.43e-06	0.000113698	Ppp2r2b	NM_027531	-	42804922	43058642	Genebody	117892	NA	NA	NA	NA
chr18	42910001	42939000	10Kb_1288	MDKO_M_995	29000	133.66	310.64	Down	-1.22	3.88e-10	5.8e-09	Ppp2r2b	NM_027531	-	42804922	43058642	Genebody	134142	NA	NA	NA	NA
chr18	42106501	42115000	5Kb_1768	MDKO_M_996	8500	40	81.98	Down	-1.04	1.32e-11	1.17e-09	Prelid2	NM_029942	-	42035349	42110847	ProximalPromoter	96.5	NA	NA	NA	NA
chr1	10983601	10985800	2Kb_13	MDKO_M_111	2200	15.93	32.13	Down	-1.01	3.35e-05	0.000319586	Prex2	NM_029525	+	10983545	11293762	Promoter3k	1155.5	NA	NA	NA	NA
chr15	93337001	93361000	10Kb_1023	MDKO_M_744	24000	131.15	265.29	Down	-1.02	4.06e-11	1.6e-09	Prickle1	NM_001033217	-	93329544	93426321	Genebody	77320.5	NA	NA	NA	NA
chr6	92614001	92616000	2Kb_5126	MDKO_M_1753	2000	11.65	23.92	Down	-1.04	1.35e-05	0.000143337	Prickle2	NM_001081146	-	92320885	92656177	Genebody	41176.5	NA	NA	NA	NA
chr11	109509401	109511800	2Kb_1219	MDKO_M_366	2400	12.4	33.16	Down	-1.42	2.36e-08	4.43e-07	Prkar1a	NM_021880	+	109512262	109530961	Promoter3k	-1661.5	NA	NA	NA	NA
chr11	108119001	108130000	10Kb_549	MDKO_M_367	11000	52.19	114.22	Down	-1.13	1.09e-11	1.6e-09	Prkca	NM_011101	-	107794700	108205201	Genebody	80700.5	NA	NA	NA	NA
chr12	74787601	74790000	2Kb_1416	MDKO_M_475	2400	10.99	30.04	Down	-1.45	4.56e-10	1.31e-08	Prkch	NM_008856	+	74686027	74879170	Genebody	102774	NA	NA	NA	NA
chr19	31779601	31780700	1kb_3542	MDKO_M_1072	1100	5.11	14.54	Down	-1.51	4.72e-06	7.61e-05	Prkg1	NM_001013833	-	30642040	31839522	Genebody	59371.5	NA	NA	NA	NA
chr15	99122801	99124800	2Kb_2247	MDKO_M_745	2000	13.7	28.46	Down	-1.06	3.36e-06	4.09e-05	Prpf40b	NM_018786	+	99125839	99147437	Promoter3k	-2038.5	NA	NA	NA	NA
chr9	72718801	72720800	2Kb_6376	MDKO_M_2191	2000	10.93	30.47	Down	-1.48	2.77e-08	5.12e-07	Prtg	NM_175485	+	72655080	72765113	Genebody	64720.5	NA	NA	NA	NA
chr9	72683201	72685800	2Kb_6375	MDKO_M_2192	2600	14.7	30.97	Down	-1.08	2.91e-06	3.59e-05	Prtg	NM_175485	+	72655080	72765113	Genebody	29420.5	NA	NA	NA	NA
chr9	72758401	72761400	2Kb_6377	MDKO_M_2193	3000	19.9	39.99	Down	-1.01	5.67e-07	8.06e-06	Prtg	NM_175485	+	72655080	72765113	Genebody	104820	NA	NA	NA	NA
chr2	167045801	167048400	2Kb_3662	MDKO_M_1198	2600	15.15	31.16	Down	-1.04	7.36e-06	8.3e-05	Ptgis	NM_008968	-	167028695	167066036	Genebody	18935.5	NA	NA	NA	NA
chr9	110635401	110636600	1kb_7596	MDKO_M_2194	1200	8.11	20.53	Down	-1.34	6.2e-06	9.68e-05	Pth1r	NM_001083936	-	110624588	110645113	Genebody	9112.5	NA	NA	NA	NA
chr1	65432801	65435800	2Kb_102	MDKO_M_112	3000	15.11	34.61	Down	-1.2	8.04e-09	1.65e-07	Pth2r	NM_139270	+	65357830	65435817	Genebody	76470.5	NA	NA	NA	NA
chr15	73138001	73165000	10Kb_968	MDKO_M_746	27000	86.71	324.65	Down	-1.9	1.75e-10	3.05e-09	Ptk2	NM_001130409	-	73045986	73253620	Genebody	102120	NA	NA	NA	NA
chr17	46726201	46727400	1kb_3061	MDKO_M_904	1200	5.84	16.38	Down	-1.49	4.83e-06	7.76e-05	Ptk7	NM_175168	-	46701399	46766452	Genebody	39651.5	NA	NA	NA	NA
chr15	73574501	73582500	5Kb_1332	MDKO_M_747	8000	39.91	88.66	Down	-1.15	1.14e-06	1.31e-05	Ptp4a3	NM_008975	+	73578455	73589195	ProximalPromoter	45.5	NA	NA	NA	NA
chr1	191585601	191586600	1kb_511	MDKO_M_113	1000	6.06	14.6	Down	-1.27	6.06e-05	0.000696398	Ptpn14	NM_008976	+	191552146	191700571	Genebody	33954.5	NA	NA	NA	NA
chr17	67478001	67494000	10Kb_1219	MDKO_M_905	16000	58.19	171.45	Down	-1.56	2.12e-11	1.6e-09	Ptprm	NM_008984	-	67016188	67703798	Genebody	217798	NA	NA	NA	NA
chr17	67498001	67533000	10Kb_1220	MDKO_M_906	35000	141.54	414.87	Down	-1.55	4.38e-10	6.4e-09	Ptprm	NM_008984	-	67016188	67703798	Genebody	188298	NA	NA	NA	NA
chr17	67258001	67274000	10Kb_1217	MDKO_M_907	16000	58.19	168.13	Down	-1.53	1.7e-11	1.6e-09	Ptprm	NM_008984	-	67016188	67703798	Genebody	437798	NA	NA	NA	NA
chr2	161926001	161955000	10Kb_1687	MDKO_M_1199	29000	154.16	312.53	Down	-1.02	1.11e-10	2.21e-09	Ptprt	NM_021464	-	161353358	162486882	Genebody	546382	NA	NA	NA	NA
chr19	6382001	6409000	10Kb_1352	MDKO_M_1073	27000	131.89	286.7	Down	-1.12	9.55e-11	2.02e-09	Pygm	NM_011224	+	6384428	6398458	Genebody	11072.5	NA	NA	NA	NA
chr6	39330401	39332600	2Kb_4996	MDKO_M_1754	2200	10.47	29.7	Down	-1.5	9.41e-10	2.46e-08	Rab19	NM_011226	+	39331426	39340377	ProximalPromoter	74.5	NA	NA	NA	NA
chr9	72898101	72899100	1kb_7435	MDKO_M_2195	1000	4.76	13.32	Down	-1.48	5.5e-05	0.00064034	Rab27a	NM_023635	+	72892671	72945398	Genebody	5929.5	NA	NA	NA	NA
chr7	99944001	99955000	10Kb_2537	MDKO_M_1846	11000	43.64	112.7	Down	-1.37	6.2e-10	8.63e-09	Rab30	NM_029494	+	99890223	99985626	Genebody	59277.5	NA	NA	NA	NA
chr5	93468001	93481000	10Kb_2170	MDKO_M_1639	13000	152.07	60.94	Up	1.32	2.84e-09	3.39e-08	Ankrd56	NM_175270	-	93470148	93474047	Promoter1k	-453.5	NA	NA	NA	NA
chr5	145112001	145127000	10Kb_2259	MDKO_M_1640	15000	135.44	46.64	Up	1.54	1.37e-11	1.6e-09	Baiap2l1	NM_025833	-	145025393	145118980	Promoter1k	-520.5	NA	NA	NA	NA
chr5	115012001	115029000	10Kb_2207	MDKO_M_1641	17000	174.3	67.84	Up	1.36	2.97e-11	1.6e-09	BC057022	NM_001004180	+	115018259	115063226	Promoter3k	2241.5	NA	NA	NA	NA
chr5	115062901	115064000	1kb_5446	MDKO_M_1642	1100	14.66	4.9	Up	1.58	9.28e-06	0.00013794	BC057022	NM_001004180	+	115018259	115063226	Genebody	45191.5	NA	NA	NA	NA
chr5	135454001	135472000	10Kb_2243	MDKO_M_1643	18000	189.38	56.84	Up	1.74	4.73e-11	1.61e-09	Cldn3	NM_009902	+	135462083	135463341	Promoter1k	917.5	NA	NA	NA	NA
chr5	139230401	139232800	2Kb_4874	MDKO_M_1644	2400	37.68	8.69	Up	2.12	9.13e-09	1.85e-07	Fam20c	NM_030565	+	139231034	139286016	Promoter1k	566.5	NA	NA	NA	NA
chr5	31592001	31610000	10Kb_2103	MDKO_M_1645	18000	189.42	73.44	Up	1.37	4.27e-11	1.6e-09	Gckr	NM_144909	+	31599953	31629674	Promoter3k	1047.5	NA	NA	NA	NA
chr5	30668301	30669300	1kb_5212	MDKO_M_1647	1000	16.13	4.85	Up	1.73	2.52e-05	0.000328738	Gm1060	NM_001033460	+	30607913	30668992	Genebody	60887.5	NA	NA	NA	NA
chr5	124419001	124429000	10Kb_2232	MDKO_M_1648	10000	107.66	52.1	Up	1.05	1.48e-11	1.6e-09	Hip1r	NM_145070	+	124423636	124453222	Promoter1k	364.5	NA	NA	NA	NA
chr5	115414501	115422500	5Kb_2956	MDKO_M_1649	8000	81.78	22.41	Up	1.87	6.42e-12	1.15e-09	Hnf1a	NM_009327	-	115398988	115421070	Promoter3k	2569.5	NA	NA	NA	NA
chr5	115402801	115403800	1kb_5449	MDKO_M_1650	1000	13.55	2.7	Up	2.33	4.19e-07	8.88e-06	Hnf1a	NM_009327	-	115398988	115421070	Genebody	17769.5	NA	NA	NA	NA
chr5	135600001	135612000	10Kb_2247	MDKO_M_1652	12000	120.26	46.93	Up	1.36	1.26e-11	1.6e-09	Mlxipl	NM_021455	+	135582782	135613791	Genebody	23218.5	NA	NA	NA	NA
chr5	135575001	135593000	10Kb_2246	MDKO_M_1653	18000	180.23	57.39	Up	1.65	1.22e-11	1.6e-09	Mlxipl	NM_021455	+	135582782	135613791	Promoter3k	1218.5	NA	NA	NA	NA
chr5	91068601	91071400	2Kb_4652	MDKO_M_1656	2800	34.87	10.47	Up	1.74	1.33e-09	3.36e-08	Rassf6	NM_028478	-	91032101	91069512	Promoter1k	-488.5	NA	NA	NA	NA
chr5	66540001	66550000	10Kb_2131	MDKO_M_1657	10000	101.61	38.73	Up	1.39	7.01e-10	9.63e-09	Rbm47	NM_001127382	-	66407795	66543162	Promoter3k	-1838.5	NA	NA	NA	NA
chr5	8621801	8622800	1kb_5158	MDKO_M_1658	1000	15.96	6.88	Up	1.22	9.81e-05	0.0010271	Rundc3b	NM_198620	-	8490335	8622951	Promoter1k	650.5	NA	NA	NA	NA
chr5	93126401	93129800	2Kb_4659	MDKO_M_1660	3400	35.76	15.83	Up	1.18	8.63e-08	1.43e-06	Shroom3	NM_015756	+	93112460	93394784	Genebody	15640.5	NA	NA	NA	NA
chr5	93108001	93121000	10Kb_2168	MDKO_M_1661	13000	117.52	51.42	Up	1.19	1.63e-11	1.6e-09	Shroom3	NM_015756	+	93112460	93394784	Promoter3k	2040.5	NA	NA	NA	NA
chr5	31395501	31396600	1kb_5214	MDKO_M_1662	1100	31.24	14.97	Up	1.06	5.6e-05	0.000650251	Slc30a3	NM_011773	-	31388478	31395899	ProximalPromoter	-151.5	NA	NA	NA	NA
chr5	73729001	73739000	10Kb_2148	MDKO_M_1665	10000	107.88	51.95	Up	1.05	1.1e-09	1.44e-08	0	0	0	0	0	OtherIntergenic	NA	NA	NA	NA	NA
chr5	125695401	125697400	2Kb_4803	MDKO_M_1666	2000	25.48	11.65	Up	1.13	1.83e-05	0.000187019	0	0	0	0	0	OtherIntergenic	NA	NA	NA	NA	NA
chr5	73253001	73264000	10Kb_2147	MDKO_M_1667	11000	104.73	38.44	Up	1.45	4.61e-12	1.6e-09	Tec	NM_001113464	-	73146961	73259686	Promoter3k	1185.5	NA	NA	NA	NA
chr5	103808801	103811400	2Kb_4695	MDKO_M_1668	2600	26.41	11.16	Up	1.24	8.07e-07	1.12e-05	0	0	0	0	0	OtherIntergenic	NA	NA	NA	NA	NA
chr5	138003001	138021000	10Kb_2255	MDKO_M_1669	18000	167.75	84.12	Up	1	3.37e-11	1.6e-09	Trfr2	NM_015799	+	138011078	138028708	Promoter1k	922.5	NA	NA	NA	NA
chr5	138023401	138026200	2Kb_4870	MDKO_M_1670	2800	31.56	7.86	Up	2.01	1.46e-09	3.62e-08	Trfr2	NM_015799	+	138011078	138028708	Genebody	13722.5	NA	NA	NA	NA
chr5	115006801	115009600	2Kb_4738	MDKO_M_1671	2800	26.44	9.19	Up	1.52	4.42e-08	7.8e-07	0	0	0	0	0	OtherIntergenic	NA	NA	NA	NA	NA
chr5	73750601	73751700	1kb_5316	MDKO_M_1672	1100	13.56	4.44	Up	1.61	9.5e-06	0.000140779	0	0	0	0	0	OtherIntergenic	NA	NA	NA	NA	NA
chr5	143101201	143102700	1kb_5625	MDKO_M_1673	1500	20.03	6.35	Up	1.66	5.68e-08	1.46e-06	0	0	0	0	0	OtherIntergenic	NA	NA	NA	NA	NA
chr5	45875301	45876300	1kb_5261	MDKO_M_1674	1000	13.69	4.14	Up	1.72	7.42e-06	0.000113628	0	0	0	0	0	OtherIntergenic	NA	NA	NA	NA	NA
chr5	73266201	73268200	2Kb_4625	MDKO_M_1675	2000	24.74	5.99	Up	2.05	1.36e-12	5e-10	0	0	0	0	0	OtherIntergenic	NA	NA	NA	NA	NA
chr5	90877601	90881200	2Kb_4650	MDKO_M_1676	3600	44.83	4.64	Up	3.27	6.05e-09	1.28e-07	0	0	0	0	0	OtherIntergenic	NA	NA	NA	NA	NA
chr6	53699901	53700900	1kb_5839	MDKO_M_1677	1000	2.56	12.54	Down	-2.29	9.15e-08	2.24e-06	0	0	0	0	0	OtherIntergenic	NA	NA	NA	NA	NA
chr6	37694901	37695900	1kb_5741	MDKO_M_1678	1000	3.89	17.9	Down	-2.2	3.08e-07	6.72e-06	0	0	0	0	0	OtherIntergenic	NA	NA	NA	NA	NA
chr17	66116501	66123500	5Kb_1674	MDKO_M_908	7000	29.49	78.3	Down	-1.41	4.66e-12	1.15e-09	Rab31	NM_133685	-	66001065	66122091	Promoter3k	2090.5	NA	NA	NA	NA
chr6	63035401	63037800	2Kb_5070	MDKO_M_1680	2400	7.84	32.34	Down	-2.04	3.32e-09	7.47e-08	0	0	0	0	0	OtherIntergenic	NA	NA	NA	NA	NA
chr6	37773501	37779000	5Kb_3090	MDKO_M_1681	5500	15.88	62.1	Down	-1.97	1.23e-12	1.15e-09	0	0	0	0	0	OtherIntergenic	NA	NA	NA	NA	NA
chr9	66760001	66775000	10Kb_2923	MDKO_M_2196	15000	77.11	159.52	Down	-1.05	2.19e-07	1.99e-06	Rab8b	NM_173413	-	66691471	66767511	ProximalPromoter	10.5	NA	NA	NA	NA
chr6	37626201	37629200	2Kb_4985	MDKO_M_1683	3000	10.17	37.46	Down	-1.88	2.69e-12	5.34e-10	0	0	0	0	0	OtherIntergenic	NA	NA	NA	NA	NA
chr6	26434501	26439500	5Kb_3077	MDKO_M_1684	5000	15.44	55.51	Down	-1.85	8.46e-13	1.15e-09	0	0	0	0	0	Genedesert	NA	NA	NA	NA	NA
chr6	37556001	37557000	1kb_5734	MDKO_M_1685	1000	3.72	13.09	Down	-1.82	1.38e-06	2.56e-05	0	0	0	0	0	OtherIntergenic	NA	NA	NA	NA	NA
chr6	26409101	26410100	1kb_5720	MDKO_M_1686	1000	3.65	12.93	Down	-1.82	1.8e-06	3.24e-05	0	0	0	0	0	Genedesert	NA	NA	NA	NA	NA
chr6	93277001	93282500	5Kb_3179	MDKO_M_1687	5500	19.99	66.97	Down	-1.74	7.96e-10	1.6e-08	0	0	0	0	0	OtherIntergenic	NA	NA	NA	NA	NA
chr6	37770401	37771400	1kb_5742	MDKO_M_1688	1000	4.01	13.05	Down	-1.7	7.02e-06	0.000108226	0	0	0	0	0	OtherIntergenic	NA	NA	NA	NA	NA
chr6	48729001	48744000	10Kb_2315	MDKO_M_1689	15000	57.28	168.94	Down	-1.56	2.6e-11	1.6e-09	0	0	0	0	0	OtherIntergenic	NA	NA	NA	NA	NA
chr6	141058001	141060000	2Kb_5252	MDKO_M_1690	2000	8.27	24.4	Down	-1.56	2.33e-09	5.43e-08	0	0	0	0	0	OtherIntergenic	NA	NA	NA	NA	NA
chr6	122564101	122565400	1kb_5984	MDKO_M_1691	1300	6.36	18.55	Down	-1.55	5.28e-05	0.00062065	0	0	0	0	0	OtherIntergenic	NA	NA	NA	NA	NA
chr6	37561001	37595000	10Kb_2306	MDKO_M_1692	34000	137.91	392.45	Down	-1.51	1.7e-10	2.98e-09	0	0	0	0	0	OtherIntergenic	NA	NA	NA	NA	NA
chr6	95297901	95298900	1kb_5924	MDKO_M_1693	1000	4.84	13.63	Down	-1.49	1.84e-05	0.000250311	0	0	0	0	0	OtherIntergenic	NA	NA	NA	NA	NA
chr6	40840601	40842800	2Kb_4999	MDKO_M_1694	2200	8.85	24.78	Down	-1.48	5.48e-09	1.17e-07	0	0	0	0	0	OtherIntergenic	NA	NA	NA	NA	NA
chr6	25846001	25868000	10Kb_2297	MDKO_M_1695	22000	99.11	269.71	Down	-1.44	5.55e-09	6.28e-08	0	0	0	0	0	Genedesert	NA	NA	NA	NA	NA
chr6	37407501	37409000	1kb_5733	MDKO_M_1696	1500	8.03	21.22	Down	-1.4	4.2e-06	6.87e-05	0	0	0	0	0	OtherIntergenic	NA	NA	NA	NA	NA
chr6	23138901	23139900	1kb_5712	MDKO_M_1697	1000	5.43	13.65	Down	-1.33	9.79e-05	0.00102569	0	0	0	0	0	OtherIntergenic	NA	NA	NA	NA	NA
chr6	87391201	87392200	1kb_5898	MDKO_M_1698	1000	5.23	13.11	Down	-1.33	6.84e-05	0.000768003	0	0	0	0	0	OtherIntergenic	NA	NA	NA	NA	NA
chr6	99542701	99543700	1kb_5927	MDKO_M_1699	1000	5.31	13.14	Down	-1.31	6.84e-05	0.000768003	0	0	0	0	0	OtherIntergenic	NA	NA	NA	NA	NA
chr6	47263801	47266200	2Kb_5002	MDKO_M_1700	2400	12.64	31.02	Down	-1.3	2.87e-08	5.29e-07	0	0	0	0	0	OtherIntergenic	NA	NA	NA	NA	NA
chr1	162298001	162312000	10Kb_159	MDKO_M_114	14000	52.69	151.86	Down	-1.53	9.4e-12	1.6e-09	Rabgap1l	NM_013862	-	162186704	162723068	Genebody	418068	NA	NA	NA	NA
chr6	131303301	131304300	1kb_6008	MDKO_M_1702	1000	7.8	18.89	Down	-1.28	4.79e-05	0.00056962	0	0	0	0	0	OtherIntergenic	NA	NA	NA	NA	NA
chr6	145552401	145554400	2Kb_5261	MDKO_M_1703	2000	11.57	27.95	Down	-1.27	2.47e-06	3.1e-05	0	0	0	0	0	OtherIntergenic	NA	NA	NA	NA	NA
chr6	50706701	50707800	1kb_5777	MDKO_M_1704	1100	7.11	17.08	Down	-1.27	9.62e-05	0.00101317	0	0	0	0	0	OtherIntergenic	NA	NA	NA	NA	NA
chr6	12066401	12067500	1kb_5691	MDKO_M_1705	1100	6.74	15.92	Down	-1.24	2.03e-05	0.000272056	0	0	0	0	0	OtherIntergenic	NA	NA	NA	NA	NA
chr6	53027901	53029100	1kb_5804	MDKO_M_1706	1200	7.65	17.86	Down	-1.22	3.58e-05	0.000444886	0	0	0	0	0	OtherIntergenic	NA	NA	NA	NA	NA
chr6	86771201	86774800	2Kb_5106	MDKO_M_1707	3600	18.58	42.32	Down	-1.19	2.92e-09	6.64e-08	0	0	0	0	0	OtherIntergenic	NA	NA	NA	NA	NA
chr6	144768501	144774000	5Kb_3264	MDKO_M_1708	5500	25.9	58.78	Down	-1.18	1.25e-10	3.36e-09	0	0	0	0	0	OtherIntergenic	NA	NA	NA	NA	NA
chr6	30547401	30550400	2Kb_4974	MDKO_M_1709	3000	16.83	37.31	Down	-1.15	2.6e-09	5.98e-08	0	0	0	0	0	OtherIntergenic	NA	NA	NA	NA	NA
chr6	12950001	12963000	10Kb_2288	MDKO_M_1710	13000	59.37	128.74	Down	-1.12	2.86e-06	2.26e-05	0	0	0	0	0	OtherIntergenic	NA	NA	NA	NA	NA
chr6	92868501	92873500	5Kb_3175	MDKO_M_1711	5000	24.73	53.57	Down	-1.12	1.01e-10	2.86e-09	0	0	0	0	0	OtherIntergenic	NA	NA	NA	NA	NA
chr6	47947301	47948400	1kb_5764	MDKO_M_1712	1100	8.29	17.99	Down	-1.12	0.000110208	0.00114753	0	0	0	0	0	OtherIntergenic	NA	NA	NA	NA	NA
chr12	80398701	80399900	1kb_1667	MDKO_M_476	1200	5.35	16.26	Down	-1.6	4.88e-07	1.02e-05	Rad51l1	NM_009014	+	80398268	80915676	Promoter3k	1032.5	NA	NA	NA	NA
chr10	21872001	21880500	5Kb_296	MDKO_M_262	8500	34.37	103.25	Down	-1.59	2.06e-07	2.61e-06	Raet1a	NM_009016	+	21878414	22093944	Promoter3k	-2163.5	NA	NA	NA	NA
chr6	120576001	120586000	10Kb_2401	MDKO_M_1715	10000	49.38	105.87	Down	-1.1	8.27e-12	1.6e-09	0	0	0	0	0	OtherIntergenic	NA	NA	NA	NA	NA
chr6	72774601	72777400	2Kb_5078	MDKO_M_1716	2800	17.89	37.91	Down	-1.08	7.13e-08	1.2e-06	0	0	0	0	0	OtherIntergenic	NA	NA	NA	NA	NA
chr6	37608001	37610200	2Kb_4984	MDKO_M_1717	2200	13.18	27.87	Down	-1.08	6.88e-05	0.000593004	0	0	0	0	0	OtherIntergenic	NA	NA	NA	NA	NA
chr6	11254001	11266000	10Kb_2286	MDKO_M_1718	12000	63.78	130.9	Down	-1.04	5.06e-06	3.88e-05	0	0	0	0	0	Genedesert	NA	NA	NA	NA	NA
chr6	112193501	112201500	5Kb_3198	MDKO_M_1719	8000	40.76	83.84	Down	-1.04	4.93e-12	1.15e-09	0	0	0	0	0	OtherIntergenic	NA	NA	NA	NA	NA
chr6	53660001	53662000	2Kb_5059	MDKO_M_1720	2000	13.12	26.98	Down	-1.04	9e-05	0.000748806	0	0	0	0	0	OtherIntergenic	NA	NA	NA	NA	NA
chr6	122246601	122249200	2Kb_5199	MDKO_M_1721	2600	17.32	35.38	Down	-1.03	1.04e-05	0.000113282	0	0	0	0	0	OtherIntergenic	NA	NA	NA	NA	NA
chr6	49939001	49969000	10Kb_2320	MDKO_M_1722	30000	191.14	384.31	Down	-1.01	1.31e-10	2.47e-09	0	0	0	0	0	OtherIntergenic	NA	NA	NA	NA	NA
chr6	144909001	144914500	5Kb_3265	MDKO_M_1723	5500	27.85	55.74	Down	-1	4.1e-09	7.11e-08	0	0	0	0	0	OtherIntergenic	NA	NA	NA	NA	NA
chr2	28388601	28391200	2Kb_3246	MDKO_M_1200	2600	13.39	32.23	Down	-1.27	1.58e-08	3.08e-07	Ralgds	NM_001145836	+	28388983	28408600	Promoter1k	917.5	NA	NA	NA	NA
chr3	13945401	13946600	1kb_4304	MDKO_M_1366	1200	6.32	17.44	Down	-1.47	5.56e-06	8.79e-05	Ralyl	NM_178631	+	13471654	14182286	Genebody	474346	NA	NA	NA	NA
chr11	33411001	33413600	2Kb_826	MDKO_M_368	2600	19.59	42.19	Down	-1.11	2.33e-06	2.94e-05	Ranbp17	NM_023146	-	33111793	33413745	Promoter3k	1444.5	NA	NA	NA	NA
chr11	74350201	74351200	1kb_1174	MDKO_M_369	1000	7.09	16.23	Down	-1.19	8.88e-05	0.00094652	Rap1gap2	NM_001015046	-	74196984	74403659	Genebody	52958.5	NA	NA	NA	NA
chr3	61169201	61171400	2Kb_3800	MDKO_M_1367	2200	6.73	28.28	Down	-2.07	3.36e-12	5.52e-10	Rap2b	NM_028712	+	61168428	61172624	Promoter3k	1872.5	NA	NA	NA	NA
chr12	118924001	118931000	5Kb_953	MDKO_M_477	7000	32.38	75.34	Down	-1.22	5.04e-10	1.07e-08	Rapgef5	NM_175930	+	118754951	118995450	Genebody	172550	NA	NA	NA	NA
chr5	121127801	121128800	1kb_5482	MDKO_M_1626	1000	7.13	16.35	Down	-1.2	7.26e-05	0.00080704	Rasal1	NM_013832	+	121098830	121129601	Genebody	29470.5	NA	NA	NA	NA
chr5	99664001	99681000	10Kb_2175	MDKO_M_1627	17000	53.82	164.73	Down	-1.61	3.88e-11	1.6e-09	Rasgef1b	NM_145839	-	99646438	99681945	Genebody	9444.5	NA	NA	NA	NA
chr5	99679001	99681000	2Kb_4669	MDKO_M_1628	2000	8.32	24.85	Down	-1.58	5.68e-10	1.6e-08	Rasgef1b	NM_145839	-	99646438	99681945	Promoter3k	1944.5	NA	NA	NA	NA
chr4	100812301	100813300	1kb_4918	MDKO_M_1489	1000	5.33	14.46	Down	-1.44	1.87e-05	0.000254443	Raver2	NM_183024	+	100741642	100824974	Genebody	71158.5	NA	NA	NA	NA
chr17	43990001	44012000	10Kb_1201	MDKO_M_909	22000	116.23	249.52	Down	-1.1	7.2e-11	1.78e-09	Rcan2	NM_207649	+	43938799	44176464	Genebody	62201.5	NA	NA	NA	NA
chr4	134965001	134988000	10Kb_2026	MDKO_M_1490	23000	99.6	231.65	Down	-1.22	3.4e-11	1.6e-09	Rcan3	NM_022980	-	134968223	134989719	Genebody	13218.5	NA	NA	NA	NA
chr7	52345601	52348600	2Kb_5362	MDKO_M_1822	3000	9.6	32.19	Down	-1.75	8.64e-10	2.29e-08	Rcn3	NM_026555	-	52338283	52347582	Promoter1k	481.5	NA	NA	NA	NA
chr1	167576001	167584500	5Kb_222	MDKO_M_115	8500	35.02	87.91	Down	-1.33	4.73e-12	1.15e-09	Rcsd1	NM_178593	-	167579075	167638224	Genebody	57973.5	NA	NA	NA	NA
chr1	167628001	167647000	10Kb_166	MDKO_M_116	19000	104.41	209.3	Down	-1	4.02e-11	1.6e-09	Rcsd1	NM_178593	-	167579075	167638224	Promoter1k	723.5	NA	NA	NA	NA
chr1	154463001	154479000	10Kb_152	MDKO_M_117	16000	79.09	166.15	Down	-1.07	7.67e-11	1.81e-09	Rgl1	NM_016846	-	154364659	154472240	Promoter3k	1239.5	NA	NA	NA	NA
chr13	98795801	98796800	1kb_2062	MDKO_M_571	1000	7.22	16.88	Down	-1.22	9.57e-05	0.00100972	Rgnef	NM_012026	-	98668549	98976119	Genebody	179818	NA	NA	NA	NA
chr13	55475901	55476900	1kb_1973	MDKO_M_572	1000	7.72	17.67	Down	-1.19	1.43e-05	0.000201411	Rgs14	NM_016758	+	55471092	55486046	Genebody	5308.5	NA	NA	NA	NA
chr1	171604601	171607200	2Kb_383	MDKO_M_118	2600	13.54	30.41	Down	-1.17	2.97e-07	4.44e-06	Rgs5	NM_009063	+	171585631	171623656	Genebody	20269.5	NA	NA	NA	NA
chr12	83774001	83805000	10Kb_666	MDKO_M_478	31000	184.32	386.91	Down	-1.07	8.24e-11	1.88e-09	Rgs6	NM_015812	+	83718024	84259798	Genebody	71476.5	NA	NA	NA	NA
chr11	109097001	109098000	1kb_1407	MDKO_M_370	1000	6.92	15.44	Down	-1.16	6.75e-05	0.000760191	Rgs9	NM_001165934	-	109091171	109159494	Genebody	61993.5	NA	NA	NA	NA
chr12	76445201	76446600	1kb_1641	MDKO_M_479	1400	6.86	17.44	Down	-1.35	3.14e-05	0.00039815	Rhoj	NM_023275	+	76409299	76502441	Genebody	36601.5	NA	NA	NA	NA
chr2	163727001	163729200	2Kb_3643	MDKO_M_1201	2200	13.42	28.36	Down	-1.08	3.62e-06	4.37e-05	Rims4	NM_183023	-	163689616	163744418	Genebody	16317.5	NA	NA	NA	NA
chr16	94549001	94551200	2Kb_2484	MDKO_M_838	2200	13.89	33.25	Down	-1.26	1.39e-06	1.84e-05	Ripply3	NM_133229	+	94550028	94558541	ProximalPromoter	72.5	NA	NA	NA	NA
chr1	155594201	155597600	2Kb_333	MDKO_M_119	3400	11.77	45.56	Down	-1.95	6.23e-09	1.31e-07	Rnasel	NM_011882	+	155596555	155611349	Promoter1k	-654.5	NA	NA	NA	NA
chr1	155600301	155601300	1kb_382	MDKO_M_120	1000	4.05	14.05	Down	-1.79	2.91e-06	4.97e-05	Rnasel	NM_011882	+	155596555	155611349	Genebody	4245.5	NA	NA	NA	NA
chr12	27090201	27091400	1kb_1521	MDKO_M_480	1200	5.74	17.71	Down	-1.62	6.74e-07	1.35e-05	Rnf144a	NM_001081977	-	26991662	27100120	Genebody	9319.5	NA	NA	NA	NA
chr13	47217101	47218100	1kb_1951	MDKO_M_573	1000	6.52	17.57	Down	-1.43	8.2e-06	0.000123754	Rnf144b	NM_146042	+	47218088	47343359	Promoter1k	-487.5	NA	NA	NA	NA
chr8	85613001	85615000	2Kb_5879	MDKO_M_2060	2000	10.37	23.71	Down	-1.19	2.8e-06	3.47e-05	Rnf150	NM_177378	+	85387254	85615168	Genebody	226746	NA	NA	NA	NA
chr11	116224501	116231500	5Kb_768	MDKO_M_371	7000	31.02	75.26	Down	-1.28	1.29e-09	2.48e-08	Rnf157	NM_027258	-	116197658	116274345	Genebody	46344.5	NA	NA	NA	NA
chr10	29169001	29183000	10Kb_229	MDKO_M_263	14000	68.17	137.63	Down	-1.01	1.81e-10	3.13e-09	Rspo3	NM_028351	-	29172914	29255672	Genebody	79671.5	NA	NA	NA	NA
chr11	29585001	29596000	10Kb_356	MDKO_M_372	11000	50.71	114.27	Down	-1.17	1.47e-11	1.6e-09	Rtn4	NM_194052	+	29592897	29644413	Promoter3k	-2396.5	NA	NA	NA	NA
chr18	89139201	89140400	1kb_3434	MDKO_M_997	1200	8.71	20.48	Down	-1.23	8.82e-06	0.000131665	Rttn	NM_175542	+	89141181	89300405	Promoter3k	-1380.5	NA	NA	NA	NA
chr16	92721501	92722500	1kb_2881	MDKO_M_839	1000	5.56	14.14	Down	-1.35	4.22e-05	0.00051159	Runx1	NM_001111021	-	92601710	92826310	Genebody	104310	NA	NA	NA	NA
chr14	47578001	47595000	10Kb_859	MDKO_M_662	17000	77.69	158.85	Down	-1.03	2.8e-11	1.6e-09	Samd4	NM_028966	+	47502639	47725491	Genebody	83861.5	NA	NA	NA	NA
chr1	181598601	181599900	1kb_456	MDKO_M_121	1300	7.87	19.24	Down	-1.29	1.46e-05	0.000204665	Sccpdh	NM_178653	+	181598361	181617314	Promoter1k	889.5	NA	NA	NA	NA
chr3	68362501	68363700	1kb_4373	MDKO_M_1368	1200	6.14	15.8	Down	-1.36	1.14e-05	0.000165685	Schip1	NM_001113420	+	67868723	68430403	Genebody	494378	NA	NA	NA	NA
chr11	106179201	106181600	2Kb_1201	MDKO_M_373	2400	12.87	31.34	Down	-1.28	6.06e-08	1.03e-06	Scn4a	NM_133199	-	106179906	106210703	Genebody	30302.5	NA	NA	NA	NA
chr1	36610001	36622000	10Kb_17	MDKO_M_122	12000	58.17	118.69	Down	-1.03	1.97e-11	1.6e-09	Sema4c	NM_001126047	-	36605486	36615225	Promoter1k	-775.5	NA	NA	NA	NA
chr18	47495001	47540000	10Kb_1293	MDKO_M_998	45000	290.29	599.96	Down	-1.05	1.9e-09	2.35e-08	Sema6a	NM_018744	-	47404907	47528521	Genebody	11020.5	NA	NA	NA	NA
chr2	124427001	124445000	10Kb_1621	MDKO_M_1202	18000	84.46	177.88	Down	-1.07	3.13e-11	1.6e-09	Sema6d	NM_172537	+	124436031	124493504	ProximalPromoter	-30.5	NA	NA	NA	NA
chr6	21931001	21943000	10Kb_2294	MDKO_M_1765	12000	106.12	52.67	Up	1.01	1.32e-08	1.4e-07	A430107O13Rik	NM_001081351	+	21935909	22205605	Promoter3k	1091.5	NA	NA	NA	NA
chr6	21949001	21955000	5Kb_3071	MDKO_M_1766	6000	56.33	19.31	Up	1.54	1.18e-10	3.22e-09	A430107O13Rik	NM_001081351	+	21935909	22205605	Genebody	16091.5	NA	NA	NA	NA
chr6	126824601	126825700	1kb_5993	MDKO_M_1767	1100	14.34	5.38	Up	1.41	8.53e-05	0.000917735	Akap3	NM_009650	+	126803115	126824325	Genebody	22035.5	NA	NA	NA	NA
chr6	125637201	125638300	1kb_5989	MDKO_M_1768	1100	17.36	6.84	Up	1.34	2.22e-05	0.000295251	Ano2	NM_153589	+	125640436	125990143	Promoter3k	-2685.5	NA	NA	NA	NA
chr6	72170001	72176500	5Kb_3142	MDKO_M_1769	6500	67.69	31.03	Up	1.13	4.14e-10	9.03e-09	Atoh8	NM_153778	-	72156171	72185570	Genebody	12319.5	NA	NA	NA	NA
chr6	54046001	54056000	10Kb_2338	MDKO_M_1771	10000	100.08	45.17	Up	1.15	9.06e-09	9.85e-08	Chn2	NM_001163640	+	53989925	54251805	Genebody	61075.5	NA	NA	NA	NA
chr6	53985001	53994000	5Kb_3134	MDKO_M_1772	9000	98.52	34.97	Up	1.49	2.29e-10	5.54e-09	Chn2	NM_001163640	+	53989925	54251805	Promoter1k	-424.5	NA	NA	NA	NA
chr6	88576401	88577400	1kb_5903	MDKO_M_1773	1000	14.77	5.73	Up	1.37	5.79e-05	0.000670526	Kbtbd12	NM_029013	-	88567429	88577438	Promoter1k	537.5	NA	NA	NA	NA
chr6	51217501	51223000	5Kb_3112	MDKO_M_1776	5500	59.8	20.51	Up	1.54	2.38e-12	1.15e-09	Mir148a	NR_029719	-	51219810	51219908	Promoter1k	-342.5	NA	NA	NA	NA
chr6	125328501	125334500	5Kb_3229	MDKO_M_1777	6000	71.66	28.97	Up	1.31	9.83e-08	1.31e-06	Plekhg6	NM_198604	-	125312668	125330521	Promoter1k	-979.5	NA	NA	NA	NA
chr6	125265001	125276000	10Kb_2412	MDKO_M_1778	11000	107.16	49.74	Up	1.11	8.42e-11	1.9e-09	Scnn1a	NM_011324	+	125271357	125294957	Promoter1k	-856.5	NA	NA	NA	NA
chr6	85280401	85283000	2Kb_5104	MDKO_M_1779	2600	29.99	8.58	Up	1.8	1.33e-10	4.6e-09	Sfxn5	NM_178639	-	85163045	85283415	Promoter3k	1714.5	NA	NA	NA	NA
chr6	120526501	120533000	5Kb_3215	MDKO_M_1780	6500	60.43	27.42	Up	1.14	1.35e-09	2.57e-08	0	0	0	0	0	OtherIntergenic	NA	NA	NA	NA	NA
chr6	86138001	86151000	10Kb_2361	MDKO_M_1781	13000	121.21	52.26	Up	1.21	1.44e-11	1.6e-09	Tgfa	NM_031199	+	86145409	86225150	Promoter1k	-908.5	NA	NA	NA	NA
chr6	54669401	54671400	2Kb_5067	MDKO_M_1782	2000	21.48	9.12	Up	1.24	4.73e-05	0.000430382	0	0	0	0	0	OtherIntergenic	NA	NA	NA	NA	NA
chr6	121287001	121297000	10Kb_2405	MDKO_M_1783	10000	99.12	39.66	Up	1.32	9.83e-11	2.06e-09	0	0	0	0	0	OtherIntergenic	NA	NA	NA	NA	NA
chr6	72216501	72218300	1kb_5860	MDKO_M_1784	1800	24.96	8.69	Up	1.52	1.02e-07	2.46e-06	0	0	0	0	0	OtherIntergenic	NA	NA	NA	NA	NA
chr4	134104001	134109000	5Kb_2736	MDKO_M_1491	5000	23.83	56.4	Down	-1.24	1.53e-10	3.97e-09	Sepn1	NM_029100	-	134093806	134108080	Promoter3k	1579.5	NA	NA	NA	NA
chr7	14239501	14241100	1kb_6064	MDKO_M_1786	1600	3.14	21.49	Down	-2.77	1.12e-12	4.53e-10	0	0	0	0	0	OtherIntergenic	NA	NA	NA	NA	NA
chr7	14718601	14721000	2Kb_5272	MDKO_M_1787	2400	8.33	27.89	Down	-1.74	1.76e-11	1.1e-09	0	0	0	0	0	OtherIntergenic	NA	NA	NA	NA	NA
chr7	14797501	14804500	5Kb_3275	MDKO_M_1788	7000	11.77	79.72	Down	-2.76	1.05e-12	1.15e-09	0	0	0	0	0	OtherIntergenic	NA	NA	NA	NA	NA
chr13	34023501	34028500	5Kb_986	MDKO_M_574	5000	14.58	67.33	Down	-2.21	8.04e-09	1.32e-07	Serpinb6a	NM_001164118	-	34009788	34027951	Promoter3k	1950.5	NA	NA	NA	NA
chr7	14894001	14911000	10Kb_2447	MDKO_M_1790	17000	37.69	156.27	Down	-2.05	6.8e-12	1.6e-09	0	0	0	0	0	OtherIntergenic	NA	NA	NA	NA	NA
chr7	16884401	16887200	2Kb_5280	MDKO_M_1791	2800	18.27	38.69	Down	-1.08	1.04e-07	1.69e-06	0	0	0	0	0	OtherIntergenic	NA	NA	NA	NA	NA
chr10	21710601	21712600	2Kb_491	MDKO_M_264	2000	8.66	23.14	Down	-1.42	1.57e-07	2.47e-06	Sgk1	NM_001161848	+	21705909	21719705	Genebody	5691.5	NA	NA	NA	NA
chr19	32390001	32409000	10Kb_1391	MDKO_M_1074	19000	64.98	210.23	Down	-1.69	8.51e-11	1.9e-09	Sgms1	NM_001168525	-	32197217	32423805	Genebody	24304.5	NA	NA	NA	NA
chr19	32282001	32296000	10Kb_1390	MDKO_M_1075	14000	44.26	139.57	Down	-1.66	9.87e-12	1.6e-09	Sgms1	NM_001168525	-	32197217	32423805	Genebody	134804	NA	NA	NA	NA
chr19	32416601	32417600	1kb_3552	MDKO_M_1076	1000	4.43	14.04	Down	-1.66	2.89e-06	4.95e-05	Sgms1	NM_001168525	-	32197217	32423805	Genebody	6704.5	NA	NA	NA	NA
chr7	26656601	26657600	1kb_6102	MDKO_M_1796	1000	4.77	14.32	Down	-1.59	1.18e-05	0.00016976	0	0	0	0	0	OtherIntergenic	NA	NA	NA	NA	NA
chr1	58053201	58054600	1kb_77	MDKO_M_123	1400	7.07	20.2	Down	-1.51	8.81e-08	2.16e-06	Sgol2	NM_199007	+	58052817	58083120	Promoter3k	1083.5	NA	NA	NA	NA
chr15	78726501	78734500	5Kb_1353	MDKO_M_748	8000	34.33	87.5	Down	-1.35	3.99e-11	1.58e-09	Sh3bp1	NM_009164	+	78730215	78742481	Promoter1k	285.5	NA	NA	NA	NA
chr1	90997001	91013000	10Kb_94	MDKO_M_124	16000	64.78	154.21	Down	-1.25	2.13e-11	1.6e-09	Sh3bp4	NM_133816	+	90967036	91050367	Genebody	37964.5	NA	NA	NA	NA
chr7	26722501	26724000	1kb_6106	MDKO_M_1800	1500	6.92	23.42	Down	-1.76	7.84e-08	1.94e-06	0	0	0	0	0	OtherIntergenic	NA	NA	NA	NA	NA
chr7	26729401	26731400	2Kb_5309	MDKO_M_1801	2000	8.91	25.66	Down	-1.53	6.87e-09	1.43e-07	0	0	0	0	0	OtherIntergenic	NA	NA	NA	NA	NA
chr7	26764001	26766400	2Kb_5310	MDKO_M_1802	2400	6.45	30.18	Down	-2.23	3.02e-10	9.21e-09	0	0	0	0	0	OtherIntergenic	NA	NA	NA	NA	NA
chr11	103211001	103233000	10Kb_532	MDKO_M_374	22000	146.46	293.69	Down	-1	5.73e-11	1.65e-09	Sh3d20	NM_183288	-	103221050	103224697	Promoter3k	2696.5	NA	NA	NA	NA
chr18	62160001	62163000	2Kb_2870	MDKO_M_999	3000	13.28	34.66	Down	-1.38	8.23e-11	3.1e-09	Sh3tc2	NM_172628	+	62112728	62175372	Genebody	48772.5	NA	NA	NA	NA
chr7	26885001	26900000	10Kb_2461	MDKO_M_1805	15000	33.58	155.74	Down	-2.21	1.38e-11	1.6e-09	0	0	0	0	0	OtherIntergenic	NA	NA	NA	NA	NA
chr3	89657801	89660000	2Kb_3858	MDKO_M_1369	2200	11.44	26.33	Down	-1.2	1.25e-07	2.01e-06	She	NM_172530	+	89635291	89662766	Genebody	23609.5	NA	NA	NA	NA
chr9	108939501	108945500	5Kb_4037	MDKO_M_2197	6000	16.32	56.49	Down	-1.79	8.94e-13	1.15e-09	Shisa5	NM_025858	+	108941140	108960237	Promoter3k	1360.5	NA	NA	NA	NA
chr19	5654601	5655800	1kb_3449	MDKO_M_1077	1200	3.36	18.31	Down	-2.45	8.34e-11	5e-09	Sipa1	NM_001164481	-	5651184	5663706	Genebody	8505.5	NA	NA	NA	NA
chr7	27010001	27016500	5Kb_3299	MDKO_M_1809	6500	14.67	70.16	Down	-2.26	1.08e-12	1.15e-09	0	0	0	0	0	OtherIntergenic	NA	NA	NA	NA	NA
chr2	129415001	129421500	5Kb_2205	MDKO_M_1203	6500	26.99	77.79	Down	-1.53	9.57e-10	1.89e-08	Sirpa	NM_007547	+	129419313	129457963	Promoter3k	-1062.5	NA	NA	NA	NA
chr7	27177001	27188000	10Kb_2462	MDKO_M_1811	11000	39.42	111.16	Down	-1.5	5.64e-12	1.6e-09	0	0	0	0	0	OtherIntergenic	NA	NA	NA	NA	NA
chr11	96482201	96484200	2Kb_1119	MDKO_M_375	2000	11.41	23.6	Down	-1.05	5.71e-05	0.00050781	Skap1	NM_001033186	+	96325937	96620935	Genebody	157264	NA	NA	NA	NA
chr7	27524501	27530000	5Kb_3303	MDKO_M_1813	5500	23.47	56.79	Down	-1.27	4.13e-12	1.15e-09	0	0	0	0	0	OtherIntergenic	NA	NA	NA	NA	NA
chr18	78697301	78698400	1kb_3414	MDKO_M_1000	1100	5.3	14.75	Down	-1.48	1.79e-05	0.000245629	Slc14a2	NM_030683	-	78379979	78793688	Genebody	95837.5	NA	NA	NA	NA
chr12	58023001	58047000	10Kb_628	MDKO_M_481	24000	80.12	293.11	Down	-1.87	1.14e-10	2.24e-09	Slc25a21	NM_001167976	-	57813620	58261629	Genebody	226628	NA	NA	NA	NA
chr7	28076601	28077600	1kb_6127	MDKO_M_1816	1000	8.7	18.54	Down	-1.09	5.24e-05	0.000616221	0	0	0	0	0	OtherIntergenic	NA	NA	NA	NA	NA
chr3	108925001	108928000	2Kb_3935	MDKO_M_1370	3000	15.26	36.86	Down	-1.27	8.81e-10	2.32e-08	Slc25a24	NM_172685	+	108926066	108971326	Promoter1k	434.5	NA	NA	NA	NA
chr7	28798601	28799600	1kb_6134	MDKO_M_1818	1000	4.37	15.4	Down	-1.82	1.07e-05	0.000156457	0	0	0	0	0	OtherIntergenic	NA	NA	NA	NA	NA
chr15	91118801	91122400	2Kb_2219	MDKO_M_749	3600	17.1	43.24	Down	-1.34	6.93e-12	7.1e-10	Slc2a13	NM_001033633	-	91098121	91403691	Genebody	283090	NA	NA	NA	NA
chr7	30365501	30366500	1kb_6140	MDKO_M_1820	1000	5.49	14.98	Down	-1.45	9.63e-06	0.000142191	0	0	0	0	0	OtherIntergenic	NA	NA	NA	NA	NA
chr9	37061601	37062800	1kb_7155	MDKO_M_2198	1200	4.67	16.02	Down	-1.78	2.82e-05	0.000361714	Slc37a2	NM_020258	-	37036733	37063322	Promoter3k	1121.5	NA	NA	NA	NA
chr6	90561001	90577000	10Kb_2367	MDKO_M_1755	16000	77.28	159.91	Down	-1.05	1.24e-10	2.38e-09	Slc41a3	NM_027868	+	90554873	90596405	Genebody	14127.5	NA	NA	NA	NA
chr11	75387401	75389400	2Kb_1008	MDKO_M_376	2000	11.66	23.78	Down	-1.03	2.45e-05	0.000242365	Slc43a2	NM_173388	+	75345211	75388542	Genebody	43189.5	NA	NA	NA	NA
chr9	21141001	21144400	2Kb_6105	MDKO_M_2199	3400	17.59	37.47	Down	-1.09	5.9e-06	6.8e-05	Slc44a2	NM_152808	+	21142295	21159471	Promoter1k	405.5	NA	NA	NA	NA
chr7	54328301	54329300	1kb_6201	MDKO_M_1825	1000	4.61	13.44	Down	-1.54	1.84e-05	0.000250311	0	0	0	0	0	OtherIntergenic	NA	NA	NA	NA	NA
chr7	59685001	59695000	10Kb_2498	MDKO_M_1826	10000	31.31	118.76	Down	-1.92	3.5e-10	5.29e-09	0	0	0	0	0	Genedesert	NA	NA	NA	NA	NA
chr7	62964001	62966800	2Kb_5384	MDKO_M_1827	2800	16.62	35.08	Down	-1.08	1.62e-06	2.11e-05	0	0	0	0	0	OtherIntergenic	NA	NA	NA	NA	NA
chr7	70457201	70458200	1kb_6221	MDKO_M_1828	1000	5.61	14.16	Down	-1.34	6.4e-05	0.000727623	0	0	0	0	0	OtherIntergenic	NA	NA	NA	NA	NA
chr7	73246001	73256000	10Kb_2502	MDKO_M_1829	10000	48.12	99.44	Down	-1.05	5.92e-12	1.6e-09	0	0	0	0	0	OtherIntergenic	NA	NA	NA	NA	NA
chr7	76059601	76060900	1kb_6261	MDKO_M_1830	1300	4.25	16.89	Down	-1.99	2e-08	5.66e-07	0	0	0	0	0	Genedesert	NA	NA	NA	NA	NA
chr7	76633601	76636000	2Kb_5417	MDKO_M_1831	2400	12.6	30.1	Down	-1.26	2.78e-08	5.14e-07	0	0	0	0	0	Genedesert	NA	NA	NA	NA	NA
chr7	77459001	77490000	10Kb_2511	MDKO_M_1832	31000	224.18	490.87	Down	-1.13	1.9e-10	3.24e-09	0	0	0	0	0	Genedesert	NA	NA	NA	NA	NA
chr7	77506001	77524000	10Kb_2512	MDKO_M_1833	18000	77.24	187.06	Down	-1.28	3.09e-11	1.6e-09	0	0	0	0	0	OtherIntergenic	NA	NA	NA	NA	NA
chr7	78166501	78172000	5Kb_3376	MDKO_M_1834	5500	28.12	56.81	Down	-1.01	3.73e-05	0.000322866	0	0	0	0	0	Genedesert	NA	NA	NA	NA	NA
chr7	78555001	78560000	5Kb_3377	MDKO_M_1835	5000	23.01	54.43	Down	-1.24	1.07e-10	3.02e-09	0	0	0	0	0	Genedesert	NA	NA	NA	NA	NA
chr7	78615401	78618000	2Kb_5423	MDKO_M_1836	2600	10.45	29.59	Down	-1.5	3.85e-10	1.13e-08	0	0	0	0	0	Genedesert	NA	NA	NA	NA	NA
chr7	78693101	78694300	1kb_6274	MDKO_M_1837	1200	4.99	16.68	Down	-1.74	4.42e-08	1.16e-06	0	0	0	0	0	Genedesert	NA	NA	NA	NA	NA
chr7	79564901	79566300	1kb_6277	MDKO_M_1838	1400	7.22	20.34	Down	-1.49	8.38e-07	1.64e-05	0	0	0	0	0	Genedesert	NA	NA	NA	NA	NA
chr7	79636001	79659000	10Kb_2514	MDKO_M_1839	23000	92.22	243.2	Down	-1.4	4.1e-11	1.6e-09	0	0	0	0	0	Genedesert	NA	NA	NA	NA	NA
chr7	79673001	79675600	2Kb_5428	MDKO_M_1840	2600	16.98	35.33	Down	-1.06	6.1e-07	8.63e-06	0	0	0	0	0	Genedesert	NA	NA	NA	NA	NA
chr7	85885801	85886900	1kb_6288	MDKO_M_1841	1100	8.7	19.6	Down	-1.17	0.000160117	0.00165775	0	0	0	0	0	OtherIntergenic	NA	NA	NA	NA	NA
chr4	59926801	59927800	1kb_4826	MDKO_M_1492	1000	12.71	25.54	Down	-1.01	4.34e-05	0.000525411	Slc46a2	NM_021053	-	59918770	59927927	Promoter1k	626.5	NA	NA	NA	NA
chr7	88990601	88993200	2Kb_5451	MDKO_M_1843	2600	16.71	34	Down	-1.03	6.24e-06	7.15e-05	0	0	0	0	0	OtherIntergenic	NA	NA	NA	NA	NA
chr15	97611201	97613800	2Kb_2232	MDKO_M_750	2600	15.07	35.07	Down	-1.22	8.21e-08	1.37e-06	Slc48a1	NM_026353	+	97614795	97623118	Promoter3k	-2294.5	NA	NA	NA	NA
chr17	54435201	54437600	2Kb_2650	MDKO_M_910	2400	14.17	28.93	Down	-1.03	7.8e-06	8.74e-05	Slc5a7	NM_022025	-	54412914	54436486	ProximalPromoter	85.5	NA	NA	NA	NA
chr8	107885501	107886500	1kb_7001	MDKO_M_2061	1000	5.24	15.28	Down	-1.54	5.71e-05	0.00066148	Slc9a5	NM_001081332	+	107872157	107893780	Genebody	13843.5	NA	NA	NA	NA
chr7	102634501	102635500	1kb_6341	MDKO_M_1847	1000	5.11	13.67	Down	-1.42	4.09e-05	0.00049768	0	0	0	0	0	Genedesert	NA	NA	NA	NA	NA
chr7	103013001	103020000	5Kb_3409	MDKO_M_1848	7000	36.03	75.34	Down	-1.06	1.6e-11	1.19e-09	0	0	0	0	0	Genedesert	NA	NA	NA	NA	NA
chr5	48372401	48373400	1kb_5263	MDKO_M_1629	1000	6.03	14.95	Down	-1.31	7.18e-05	0.000801194	Slit2	NM_178804	+	48374393	48697016	Promoter3k	-1492.5	NA	NA	NA	NA
chr11	35220801	35221800	1kb_961	MDKO_M_377	1000	6.65	15.37	Down	-1.21	8.46e-05	0.000912579	Slit3	NM_011412	+	34934957	35522004	Genebody	286344	NA	NA	NA	NA
chr2	131318001	131321000	2Kb_3531	MDKO_M_1204	3000	15.86	37.57	Down	-1.24	1.68e-09	4.11e-08	Smox	NM_145533	+	131317678	131350907	Promoter3k	1822.5	NA	NA	NA	NA
chr7	104510301	104511300	1kb_6363	MDKO_M_1852	1000	4.93	13.6	Down	-1.46	9.79e-05	0.00102569	0	0	0	0	0	OtherIntergenic	NA	NA	NA	NA	NA
chr18	52959401	52960500	1kb_3293	MDKO_M_1001	1100	6.81	15.62	Down	-1.2	6.75e-05	0.000760191	Sncaip	NM_026408	+	52927362	53075583	Genebody	32588.5	NA	NA	NA	NA
chr16	11063501	11069000	5Kb_1457	MDKO_M_840	5500	22.57	58.34	Down	-1.37	2.08e-12	1.15e-09	Snn	NM_009223	+	11066390	11075077	ProximalPromoter	-139.5	NA	NA	NA	NA
chr7	107334401	107337000	2Kb_5508	MDKO_M_1855	2600	17.7	38.91	Down	-1.14	1.49e-05	0.000155773	0	0	0	0	0	OtherIntergenic	NA	NA	NA	NA	NA
chr8	46592701	46593700	1kb_6761	MDKO_M_2062	1000	7.34	16.45	Down	-1.16	8.37e-05	0.000905746	Sorbs2	NM_172752	+	46593148	46913257	ProximalPromoter	52.5	NA	NA	NA	NA
chr7	119761001	119774000	10Kb_2561	MDKO_M_1857	13000	60.86	143.81	Down	-1.24	9.02e-12	1.6e-09	0	0	0	0	0	OtherIntergenic	NA	NA	NA	NA	NA
chr7	119775001	119780000	5Kb_3439	MDKO_M_1858	5000	25.45	55.59	Down	-1.13	3.42e-09	6e-08	0	0	0	0	0	OtherIntergenic	NA	NA	NA	NA	NA
chr7	119782801	119796600	2Kb_5529	MDKO_M_1859	13800	56.89	246.68	Down	-2.12	1.08e-10	3.86e-09	0	0	0	0	0	OtherIntergenic	NA	NA	NA	NA	NA
chr7	119798001	119808400	2Kb_5530	MDKO_M_1860	10400	50.13	136.3	Down	-1.44	3.68e-11	1.7e-09	0	0	0	0	0	OtherIntergenic	NA	NA	NA	NA	NA
chr13	29031001	29056000	10Kb_727	MDKO_M_575	25000	146.13	345.83	Down	-1.24	6.63e-11	1.72e-09	Sox4	NM_009238	-	29042598	29045550	Promoter3k	2049.5	NA	NA	NA	NA
chr3	99869201	99871200	2Kb_3909	MDKO_M_1371	2000	12.35	25.64	Down	-1.05	2.64e-05	0.000258695	Spag17	NM_028892	+	99689339	99947244	Genebody	180862	NA	NA	NA	NA
chr7	120520401	120522400	2Kb_5538	MDKO_M_1863	2000	13.04	27.52	Down	-1.08	1.76e-05	0.000181081	0	0	0	0	0	OtherIntergenic	NA	NA	NA	NA	NA
chr1	188957001	189013000	10Kb_199	MDKO_M_125	56000	314.11	635.67	Down	-1.02	2.21e-10	3.62e-09	Spata17	NM_029067	-	188959171	189039324	Genebody	54323.5	NA	NA	NA	NA
chr7	122545201	122547200	2Kb_5545	MDKO_M_1865	2000	11.96	24.06	Down	-1.01	6.25e-05	0.000547659	0	0	0	0	0	OtherIntergenic	NA	NA	NA	NA	NA
chr7	125609001	125611800	2Kb_5556	MDKO_M_1866	2800	16.78	41.64	Down	-1.31	6.41e-08	1.09e-06	0	0	0	0	0	OtherIntergenic	NA	NA	NA	NA	NA
chr7	125651401	125652400	1kb_6447	MDKO_M_1867	1000	5.57	14.2	Down	-1.35	9.53e-05	0.00100614	0	0	0	0	0	OtherIntergenic	NA	NA	NA	NA	NA
chr4	111389001	111395500	5Kb_2670	MDKO_M_1493	6500	28.97	67.22	Down	-1.21	7.73e-10	1.56e-08	Spata6	NM_026470	+	111392614	111501744	Promoter1k	-363.5	NA	NA	NA	NA
chr2	172802201	172804400	2Kb_3698	MDKO_M_1205	2200	12.74	29.57	Down	-1.21	7.39e-06	8.33e-05	Spo11	NM_001083959	+	172805342	172819076	Promoter3k	-2041.5	NA	NA	NA	NA
chr6	112897401	112900000	2Kb_5175	MDKO_M_1756	2600	17.37	36	Down	-1.05	2.78e-06	3.45e-05	Srgap3	NM_080448	-	112667965	112897259	Promoter3k	-1441.5	NA	NA	NA	NA
chr8	73116001	73143000	10Kb_2700	MDKO_M_2063	27000	115.72	335.21	Down	-1.53	4.55e-10	6.63e-09	Ssbp4	NM_133772	-	73121389	73132212	Promoter3k	2711.5	NA	NA	NA	NA
chr8	113444001	113454000	10Kb_2777	MDKO_M_2064	10000	47.51	105.9	Down	-1.16	8.73e-09	9.56e-08	St3gal2	NM_009179	+	113443764	113496396	Genebody	5236.5	NA	NA	NA	NA
chr7	127713001	127715200	2Kb_5567	MDKO_M_1873	2200	13.29	28.49	Down	-1.1	9.44e-07	1.29e-05	0	0	0	0	0	OtherIntergenic	NA	NA	NA	NA	NA
chr7	127743801	127746800	2Kb_5568	MDKO_M_1874	3000	18.87	39.95	Down	-1.08	1.09e-05	0.000118263	0	0	0	0	0	OtherIntergenic	NA	NA	NA	NA	NA
chr3	153271801	153274400	2Kb_4041	MDKO_M_1372	2600	18.52	37.71	Down	-1.03	8.21e-08	1.37e-06	St6galnac3	NM_011372	-	152865472	153388096	Genebody	114996	NA	NA	NA	NA
chr7	128947001	128996000	10Kb_2578	MDKO_M_1876	49000	274.08	685.23	Down	-1.32	1.06e-09	1.39e-08	0	0	0	0	0	OtherIntergenic	NA	NA	NA	NA	NA
chr7	130084001	130085000	1kb_6485	MDKO_M_1877	1000	5	14.78	Down	-1.56	2.94e-06	5.02e-05	0	0	0	0	0	OtherIntergenic	NA	NA	NA	NA	NA
chr7	137206401	137208600	2Kb_5599	MDKO_M_1878	2200	11.04	24.66	Down	-1.16	3.3e-06	4.02e-05	0	0	0	0	0	OtherIntergenic	NA	NA	NA	NA	NA
chr7	137215501	137221500	5Kb_3484	MDKO_M_1879	6000	37.52	79.31	Down	-1.08	8.9e-08	1.2e-06	0	0	0	0	0	OtherIntergenic	NA	NA	NA	NA	NA
chr14	31972001	31978500	5Kb_1157	MDKO_M_663	6500	29.45	67.39	Down	-1.19	4.85e-09	8.28e-08	Stab1	NM_138672	-	31952202	31981826	Genebody	6575.5	NA	NA	NA	NA
chr7	137982201	137984400	2Kb_5604	MDKO_M_1881	2200	14.43	30.67	Down	-1.09	2.66e-05	0.000260373	0	0	0	0	0	OtherIntergenic	NA	NA	NA	NA	NA
chr7	138399001	138400100	1kb_6521	MDKO_M_1882	1100	5.99	15.52	Down	-1.37	5.09e-05	0.000601296	0	0	0	0	0	OtherIntergenic	NA	NA	NA	NA	NA
chr7	138406801	138408800	2Kb_5617	MDKO_M_1883	2000	10.38	25.15	Down	-1.28	1.36e-06	1.81e-05	0	0	0	0	0	OtherIntergenic	NA	NA	NA	NA	NA
chr10	86436001	86439000	2Kb_639	MDKO_M_265	3000	14.58	37.42	Down	-1.36	1.73e-09	4.21e-08	Stab2	NM_138673	-	86303954	86470686	Genebody	33185.5	NA	NA	NA	NA
chr10	86310001	86320000	10Kb_291	MDKO_M_266	10000	47.33	118.53	Down	-1.32	7.27e-11	1.79e-09	Stab2	NM_138673	-	86303954	86470686	Genebody	155686	NA	NA	NA	NA
chr19	34236001	34338000	10Kb_1393	MDKO_M_1078	102000	570.58	1424.32	Down	-1.32	1.62e-08	1.7e-07	Stambpl1	NM_029682	+	34266759	34314817	Genebody	20241.5	NA	NA	NA	NA
chr6	49415901	49416900	1kb_5770	MDKO_M_1757	1000	4.82	13.11	Down	-1.44	1.87e-05	0.000254266	Stk31	NM_029916	+	49345602	49419500	Genebody	70798.5	NA	NA	NA	NA
chr7	140649001	140650000	1kb_6531	MDKO_M_1888	1000	5.88	14.14	Down	-1.27	6.64e-05	0.00075051	0	0	0	0	0	OtherIntergenic	NA	NA	NA	NA	NA
chr18	43402501	43407500	5Kb_1774	MDKO_M_1002	5000	27.25	63.62	Down	-1.22	1.21e-08	1.89e-07	Stk32a	NM_178749	+	43367350	43477134	Genebody	37650.5	NA	NA	NA	NA
chr7	141698101	141699200	1kb_6533	MDKO_M_1890	1100	5.57	14.63	Down	-1.39	1.46e-05	0.000204665	0	0	0	0	0	OtherIntergenic	NA	NA	NA	NA	NA
chr7	142580901	142581900	1kb_6536	MDKO_M_1891	1000	8.28	17.39	Down	-1.07	8.61e-05	0.000924456	0	0	0	0	0	OtherIntergenic	NA	NA	NA	NA	NA
chr7	143815801	143818000	2Kb_5639	MDKO_M_1892	2200	13.6	27.33	Down	-1.01	3.81e-05	0.000357297	0	0	0	0	0	Genedesert	NA	NA	NA	NA	NA
chr7	143972001	144005000	10Kb_2607	MDKO_M_1893	33000	185.35	375.45	Down	-1.02	1.04e-10	2.13e-09	0	0	0	0	0	Genedesert	NA	NA	NA	NA	NA
chr7	144880601	144881600	1kb_6559	MDKO_M_1894	1000	4.54	13.7	Down	-1.59	7.43e-06	0.000113628	0	0	0	0	0	OtherIntergenic	NA	NA	NA	NA	NA
chr2	68254001	68283000	10Kb_1546	MDKO_M_1206	29000	147.51	315.22	Down	-1.1	2.78e-10	4.39e-09	Stk39	NM_016866	-	68048503	68310037	Genebody	41536.5	NA	NA	NA	NA
chr10	12675001	12686000	10Kb_215	MDKO_M_267	11000	46.95	113.59	Down	-1.27	1.42e-11	1.6e-09	Stx11	NM_029075	-	12659786	12684064	Genebody	3563.5	NA	NA	NA	NA
chr7	147957001	147999000	10Kb_2620	MDKO_M_1897	42000	221.18	489.26	Down	-1.15	3.04e-10	4.69e-09	0	0	0	0	0	OtherIntergenic	NA	NA	NA	NA	NA
chr2	32672601	32674000	1kb_3792	MDKO_M_1207	1400	7.54	20.01	Down	-1.41	5.2e-07	1.07e-05	Stxbp1	NM_009295	-	32643126	32702751	Genebody	29450.5	NA	NA	NA	NA
chr17	45126001	45160000	10Kb_1203	MDKO_M_911	34000	146.62	429.05	Down	-1.55	1.38e-09	1.76e-08	Supt3h	NM_178652	+	44914119	45256232	Genebody	228882	NA	NA	NA	NA
chr17	45166001	45172000	5Kb_1654	MDKO_M_912	6000	27.37	65.97	Down	-1.27	2e-12	1.15e-09	Supt3h	NM_178652	+	44914119	45256232	Genebody	254882	NA	NA	NA	NA
chr7	3217001	3220000	2Kb_5264	MDKO_M_1901	3000	37.28	10.85	Up	1.78	1.04e-12	5e-10	Mir290	NR_029640	+	3218626	3218708	ProximalPromoter	-125.5	NA	NA	NA	NA
chr7	3544801	3545800	1kb_6055	MDKO_M_1902	1000	15.96	5.98	Up	1.42	7.5e-05	0.000828644	0	0	0	0	0	OtherIntergenic	NA	NA	NA	NA	NA
chr7	4787501	4788500	1kb_6057	MDKO_M_1903	1000	26.89	11.85	Up	1.18	5.27e-05	0.000619327	Shisa7	NM_172737	-	4777154	4796297	Genebody	8296.5	NA	NA	NA	NA
chr7	4849801	4851200	1kb_6058	MDKO_M_1904	1400	18.76	5.42	Up	1.79	4.86e-07	1.01e-05	0	0	0	0	0	OtherIntergenic	NA	NA	NA	NA	NA
chr7	16556801	16558000	1kb_6076	MDKO_M_1905	1200	13.6	3.79	Up	1.85	1.11e-05	0.000162044	Gltscr1	NM_001081418	-	16556610	16584843	Genebody	27442.5	NA	NA	NA	NA
chr7	16646601	16647700	1kb_6077	MDKO_M_1906	1100	35.87	16.26	Up	1.14	4.2e-05	0.000509482	0	0	0	0	0	OtherIntergenic	NA	NA	NA	NA	NA
chr7	16653901	16654900	1kb_6078	MDKO_M_1907	1000	19.58	6.6	Up	1.57	8.03e-05	0.000878385	Zfp541	NM_001099277	+	16657290	16681676	Promoter3k	-2889.5	NA	NA	NA	NA
chr7	25396601	25398600	2Kb_5302	MDKO_M_1911	2000	22.39	10.61	Up	1.08	5.29e-05	0.000476534	Phldb3	NM_001102613	+	25396346	25414315	Promoter3k	1254.5	NA	NA	NA	NA
chr7	26456401	26457500	1kb_6099	MDKO_M_1912	1100	15.57	4.63	Up	1.75	6.28e-06	9.79e-05	Tmem91	NM_177102	-	26454160	26460184	Genebody	3233.5	NA	NA	NA	NA
chr7	31263701	31264800	1kb_6144	MDKO_M_1913	1100	16.81	7	Up	1.26	0.000125414	0.00130361	Nphs1	NM_019459	+	31245076	31273627	Genebody	19174.5	NA	NA	NA	NA
chr7	31272501	31277500	5Kb_3314	MDKO_M_1914	5000	48.83	20.56	Up	1.25	3.23e-09	5.7e-08	0	0	0	0	0	OtherIntergenic	NA	NA	NA	NA	NA
chr7	31508401	31509600	1kb_6149	MDKO_M_1915	1200	16.16	5.39	Up	1.59	4.23e-05	0.000511993	Atp4a	NM_018731	+	31497250	31510552	Genebody	11750.5	NA	NA	NA	NA
chr7	31744001	31750500	5Kb_3317	MDKO_M_1916	6500	64.34	17.39	Up	1.89	2.57e-12	1.15e-09	Lsr	NM_001164185	-	31742790	31758487	Genebody	11236.5	NA	NA	NA	NA
chr7	31753501	31760500	5Kb_3318	MDKO_M_1917	7000	66.65	19.72	Up	1.76	3.02e-12	1.15e-09	Lsr	NM_001164185	-	31742790	31758487	Promoter3k	1486.5	NA	NA	NA	NA
chr7	35436001	35448000	10Kb_2478	MDKO_M_1918	12000	134.99	51.96	Up	1.38	2.45e-11	1.6e-09	0	0	0	0	0	OtherIntergenic	NA	NA	NA	NA	NA
chr7	35870901	35873400	1kb_6159	MDKO_M_1919	2500	31.68	8.95	Up	1.82	2.97e-08	8.09e-07	0	0	0	0	0	OtherIntergenic	NA	NA	NA	NA	NA
chr7	35911001	35912300	1kb_6160	MDKO_M_1920	1300	17.11	4.55	Up	1.91	4.74e-07	9.9e-06	0	0	0	0	0	OtherIntergenic	NA	NA	NA	NA	NA
chr7	35913601	35914700	1kb_6161	MDKO_M_1921	1100	14.13	2.53	Up	2.48	2.58e-09	9.22e-08	0	0	0	0	0	OtherIntergenic	NA	NA	NA	NA	NA
chr7	36163701	36164900	1kb_6165	MDKO_M_1922	1200	13.6	3.82	Up	1.83	3.25e-06	5.47e-05	Rhpn2	NM_027897	+	36119255	36177303	Genebody	45045.5	NA	NA	NA	NA
chr7	48154501	48155500	1kb_6170	MDKO_M_1923	1000	28.52	13.86	Up	1.04	8.4e-05	0.000908526	Vstm2b	NM_021387	+	48154647	48185337	Promoter1k	353.5	NA	NA	NA	NA
chr7	51591001	51592000	1kb_6171	MDKO_M_1924	1000	33.59	16.1	Up	1.06	7.61e-05	0.00083877	Shank1	NM_001034115	+	51565633	51613722	Genebody	25867.5	NA	NA	NA	NA
chr7	51639301	51640700	1kb_6172	MDKO_M_1925	1400	21.58	6.89	Up	1.65	8.22e-06	0.000123913	Syt3	NM_001114116	+	51639495	51655399	Promoter1k	505.5	NA	NA	NA	NA
chr7	51721401	51722400	1kb_6173	MDKO_M_1926	1000	13.5	3.93	Up	1.78	6.82e-05	0.000766696	Aspdh	NM_026690	+	51720804	51723120	Promoter3k	1096.5	NA	NA	NA	NA
chr7	51925301	51926800	1kb_6181	MDKO_M_1927	1500	18.92	5.51	Up	1.78	6.19e-07	1.26e-05	0	0	0	0	0	OtherIntergenic	NA	NA	NA	NA	NA
chr7	52207301	52208300	1kb_6182	MDKO_M_1928	1000	14.82	3.99	Up	1.89	4.79e-05	0.000570197	Tsks	NM_001077591	+	52198609	52213404	Genebody	9191.5	NA	NA	NA	NA
chr7	52522001	52524000	2Kb_5366	MDKO_M_1929	2000	22.75	9.96	Up	1.19	8.83e-05	0.000736101	0	0	0	0	0	OtherIntergenic	NA	NA	NA	NA	NA
chr7	53968301	53969800	1kb_6199	MDKO_M_1930	1500	18.52	7.2	Up	1.36	0.000107361	0.00111848	Saa3	NM_011315	-	53967367	53971045	Promoter3k	1994.5	NA	NA	NA	NA
chr7	53972001	53977500	5Kb_3346	MDKO_M_1931	5500	56.36	19.91	Up	1.5	2.7e-12	1.15e-09	0	0	0	0	0	OtherIntergenic	NA	NA	NA	NA	NA
chr7	54371201	54372200	1kb_6202	MDKO_M_1932	1000	16.25	5.15	Up	1.66	1.63e-05	0.000226537	Ptpn5	NM_001163565	-	54333171	54387967	Genebody	16266.5	NA	NA	NA	NA
chr7	56038601	56039600	1kb_6204	MDKO_M_1933	1000	11.96	4	Up	1.58	7.27e-05	0.000807874	0	0	0	0	0	OtherIntergenic	NA	NA	NA	NA	NA
chr7	56133001	56147000	10Kb_2494	MDKO_M_1934	14000	126.7	56.91	Up	1.15	2.09e-11	1.6e-09	0	0	0	0	0	OtherIntergenic	NA	NA	NA	NA	NA
chr7	56704801	56705800	1kb_6208	MDKO_M_1935	1000	11.79	3.18	Up	1.89	1.36e-05	0.000193381	Nav2	NM_175272	+	56501558	56865457	Genebody	203742	NA	NA	NA	NA
chr7	59260801	59262000	1kb_6214	MDKO_M_1936	1200	18.19	5.56	Up	1.71	5.47e-06	8.67e-05	Svip	NM_001160345	-	59252531	59261387	ProximalPromoter	-13.5	NA	NA	NA	NA
chr7	72300001	72301800	1kb_6223	MDKO_M_1937	1800	56.05	27.48	Up	1.03	2.32e-06	4.07e-05	Fam189a1	NM_183087	-	71900981	72301413	Promoter1k	512.5	NA	NA	NA	NA
chr7	72515201	72517400	1kb_6224	MDKO_M_1938	2200	31.35	4.72	Up	2.73	2.64e-10	1.31e-08	Tjp1	NM_001163574	-	72441053	72516129	ProximalPromoter	-171.5	NA	NA	NA	NA
chr7	72779101	72780300	1kb_6225	MDKO_M_1939	1200	18.08	5.76	Up	1.65	6.47e-05	0.000734234	0	0	0	0	0	OtherIntergenic	NA	NA	NA	NA	NA
chr7	75420701	75421900	1kb_6260	MDKO_M_1940	1200	15.71	3.8	Up	2.05	8.03e-07	1.58e-05	Fam169b	NM_001013811	+	75418724	75507975	Promoter3k	2576.5	NA	NA	NA	NA
chr7	80936501	80937500	1kb_6281	MDKO_M_1942	1000	18.13	5.16	Up	1.81	2.67e-05	0.000344968	0	0	0	0	0	OtherIntergenic	NA	NA	NA	NA	NA
chr7	82651301	82652300	1kb_6284	MDKO_M_1943	1000	13.08	3.9	Up	1.75	6.05e-05	0.000696398	Akap13	NM_029332	+	82600419	82899494	Genebody	51381.5	NA	NA	NA	NA
chr7	82652801	82654800	2Kb_5433	MDKO_M_1944	2000	24.52	9.19	Up	1.42	3.48e-06	4.22e-05	Akap13	NM_029332	+	82600419	82899494	Genebody	53381.5	NA	NA	NA	NA
chr7	86735001	86736000	1kb_6296	MDKO_M_1945	1000	33.03	15.89	Up	1.06	6.69e-05	0.000756287	0	0	0	0	0	OtherIntergenic	NA	NA	NA	NA	NA
chr7	86954701	86956200	1kb_6300	MDKO_M_1946	1500	22.21	9.26	Up	1.26	4.47e-06	7.26e-05	Mesp2	NM_008589	+	86955612	86958316	ProximalPromoter	-161.5	NA	NA	NA	NA
chr7	97520201	97521200	1kb_6332	MDKO_M_1948	1000	14.68	5.29	Up	1.47	3.91e-05	0.000478771	Sytl2	NM_001040085	+	97497208	97558948	Genebody	23492.5	NA	NA	NA	NA
chr7	104885101	104886100	1kb_6365	MDKO_M_1949	1000	11.67	2.82	Up	2.05	1.44e-06	2.66e-05	Aqp11	NM_175105	-	104874888	104886756	Promoter3k	1155.5	NA	NA	NA	NA
chr7	105259401	105260400	1kb_6366	MDKO_M_1950	1000	20.19	9.36	Up	1.11	5.81e-05	0.000672723	Myo7a	NM_008663	-	105199569	105268002	Genebody	8101.5	NA	NA	NA	NA
chr7	105617001	105618000	1kb_6369	MDKO_M_1951	1000	15.22	5.45	Up	1.48	9.91e-05	0.00103631	Gucy2d	NM_001130693	+	105591931	105625801	Genebody	25569.5	NA	NA	NA	NA
chr7	106325701	106327200	1kb_6374	MDKO_M_1952	1500	18.61	4.93	Up	1.92	1.98e-08	5.61e-07	Dgat2	NM_026384	-	106302172	106331222	Genebody	4771.5	NA	NA	NA	NA
chr7	106329501	106334500	5Kb_3420	MDKO_M_1953	5000	55	19.76	Up	1.48	2.78e-11	1.36e-09	Dgat2	NM_026384	-	106302172	106331222	Promoter1k	-778.5	NA	NA	NA	NA
chr7	106342701	106343800	1kb_6378	MDKO_M_1954	1100	12.49	1.25	Up	3.32	2.57e-09	9.19e-08	0	0	0	0	0	OtherIntergenic	NA	NA	NA	NA	NA
chr7	106465401	106466400	1kb_6379	MDKO_M_1955	1000	14.93	5.49	Up	1.44	8.31e-05	0.000900314	Mtap6	NM_001048167	+	106415956	106468861	Genebody	49944.5	NA	NA	NA	NA
chr7	108463001	108476000	10Kb_2554	MDKO_M_1956	13000	128.58	57.09	Up	1.17	2.1e-11	1.6e-09	Stard10	NM_019990	+	108469832	108494825	Promoter1k	-331.5	NA	NA	NA	NA
chr7	108592601	108593600	1kb_6393	MDKO_M_1957	1000	20.65	7.76	Up	1.41	3.48e-05	0.000434105	Pde2a	NM_001143848	+	108570211	108661339	Genebody	22889.5	NA	NA	NA	NA
chr7	112573801	112574800	1kb_6396	MDKO_M_1958	1000	33.3	15.11	Up	1.14	5.59e-05	0.000649846	Cckbr	NM_007627	+	112574333	112584851	ProximalPromoter	-32.5	NA	NA	NA	NA
chr7	112735601	112736800	1kb_6397	MDKO_M_1959	1200	14.89	5.35	Up	1.48	0.000154532	0.00160161	0	0	0	0	0	OtherIntergenic	NA	NA	NA	NA	NA
chr7	112834501	112835500	1kb_6398	MDKO_M_1960	1000	16.39	4.94	Up	1.73	6.3e-05	0.000717948	0	0	0	0	0	OtherIntergenic	NA	NA	NA	NA	NA
chr7	114809101	114810200	1kb_6402	MDKO_M_1961	1100	13.44	3.83	Up	1.81	5.28e-06	8.4e-05	Ppfibp2	NM_001163557	+	114750357	114892095	Genebody	59293.5	NA	NA	NA	NA
chr7	116387001	116388000	1kb_6407	MDKO_M_1962	1000	14.43	5.06	Up	1.51	4.4e-05	0.000531651	0	0	0	0	0	OtherIntergenic	NA	NA	NA	NA	NA
chr7	119477301	119478300	1kb_6411	MDKO_M_1963	1000	13.49	4.05	Up	1.74	4.7e-05	0.000560785	Mical2	NM_177282	+	119369403	119496925	Genebody	108398	NA	NA	NA	NA
chr7	120909901	120910900	1kb_6430	MDKO_M_1964	1000	31.56	14.58	Up	1.11	6.6e-05	0.00074673	Spon1	NM_145584	+	120909511	121186888	Promoter1k	889.5	NA	NA	NA	NA
chr7	121962001	121964000	2Kb_5544	MDKO_M_1965	2000	22.71	9.51	Up	1.26	4.37e-06	5.18e-05	Insc	NM_173767	+	121889279	121993893	Genebody	73721.5	NA	NA	NA	NA
chr7	123449701	123451600	1kb_6436	MDKO_M_1966	1900	28.57	8.78	Up	1.7	3.57e-08	9.53e-07	0	0	0	0	0	OtherIntergenic	NA	NA	NA	NA	NA
chr7	125725001	125731000	5Kb_3455	MDKO_M_1967	6000	60.62	29.09	Up	1.06	5.22e-07	6.25e-06	Tmc7	NM_172476	-	125679357	125728199	ProximalPromoter	198.5	NA	NA	NA	NA
chr7	132548601	132550000	1kb_6486	MDKO_M_1968	1400	28.08	10.75	Up	1.39	8.62e-06	0.0001292	0	0	0	0	0	OtherIntergenic	NA	NA	NA	NA	NA
chr7	134056301	134057300	1kb_6489	MDKO_M_1970	1000	12.74	3.43	Up	1.89	7.73e-06	0.000117372	0	0	0	0	0	OtherIntergenic	NA	NA	NA	NA	NA
chr7	134506501	134508300	1kb_6491	MDKO_M_1972	1800	26.66	8.53	Up	1.64	9.55e-07	1.85e-05	0	0	0	0	0	OtherIntergenic	NA	NA	NA	NA	NA
chr7	137719401	137721800	2Kb_5601	MDKO_M_1973	2400	26.13	11.57	Up	1.18	3.31e-06	4.03e-05	Tacc2	NM_001004468	+	137720997	137908295	Promoter1k	-396.5	NA	NA	NA	NA
chr7	137770001	137771000	1kb_6499	MDKO_M_1974	1000	12.73	3.49	Up	1.87	2.68e-06	4.63e-05	Tacc2	NM_001004468	+	137720997	137908295	Genebody	49503.5	NA	NA	NA	NA
chr7	146825301	146826500	1kb_6565	MDKO_M_1975	1200	21.58	8.56	Up	1.33	0.000102393	0.00106799	0	0	0	0	0	OtherIntergenic	NA	NA	NA	NA	NA
chr7	146967801	146968800	1kb_6566	MDKO_M_1976	1000	11.83	4.15	Up	1.51	7.27e-05	0.000807874	0	0	0	0	0	OtherIntergenic	NA	NA	NA	NA	NA
chr7	147081501	147082700	1kb_6567	MDKO_M_1977	1200	27.32	12.59	Up	1.12	0.000326712	0.00335778	Kndc1	NM_177261	+	147080594	147127438	Promoter3k	1506.5	NA	NA	NA	NA
chr7	148025501	148026800	1kb_6580	MDKO_M_1978	1300	20.04	5.4	Up	1.89	1.53e-07	3.54e-06	0	0	0	0	0	OtherIntergenic	NA	NA	NA	NA	NA
chr7	148099001	148119000	10Kb_2621	MDKO_M_1979	20000	214.7	82.54	Up	1.38	6.02e-11	1.67e-09	Nlrp6	NM_001081389	+	148106800	148114438	Promoter3k	2200.5	NA	NA	NA	NA
chr7	148395901	148396900	1kb_6582	MDKO_M_1980	1000	14.29	5.35	Up	1.42	7.18e-05	0.000801194	1600016N20Rik	NM_028050	-	148395941	148399978	Genebody	3577.5	NA	NA	NA	NA
chr7	148402601	148404200	1kb_6583	MDKO_M_1981	1600	20.82	6.34	Up	1.71	1.94e-06	3.46e-05	Rassf7	NM_025886	+	148401758	148404556	Promoter3k	1642.5	NA	NA	NA	NA
chr7	148546101	148547400	1kb_6585	MDKO_M_1983	1300	17.19	3.61	Up	2.25	3.63e-08	9.69e-07	B230206H07Rik	NM_177280	-	148545076	148551008	Genebody	4257.5	NA	NA	NA	NA
chr7	148549601	148550600	1kb_6586	MDKO_M_1984	1000	13.61	3.92	Up	1.8	6.03e-05	0.000694393	B230206H07Rik	NM_177280	-	148545076	148551008	Promoter1k	907.5	NA	NA	NA	NA
chr7	150653301	150654600	1kb_6604	MDKO_M_1985	1300	19.37	8.52	Up	1.18	4.8e-05	0.000570419	0	0	0	0	0	OtherIntergenic	NA	NA	NA	NA	NA
chr7	150660001	150661000	1kb_6605	MDKO_M_1986	1000	13.44	2.86	Up	2.23	4.65e-07	9.73e-06	Slc22a18	NM_008767	+	150659659	150685236	Promoter1k	841.5	NA	NA	NA	NA
chr7	150661601	150662700	1kb_6606	MDKO_M_1987	1100	18.09	2.93	Up	2.63	7.77e-08	1.93e-06	Slc22a18	NM_001042760	+	150661020	150685236	Promoter3k	1130.5	NA	NA	NA	NA
chr7	150675501	150680500	5Kb_3539	MDKO_M_1988	5000	51.99	25.54	Up	1.03	8.92e-09	1.44e-07	Slc22a18	NM_001042760	+	150661020	150685236	Genebody	16980.5	NA	NA	NA	NA
chr7	151469001	151471200	1kb_6611	MDKO_M_1989	2200	32.95	7.62	Up	2.11	5.89e-09	1.9e-07	Shank2	NM_001113373	+	151361424	151608579	Genebody	108676	NA	NA	NA	NA
chr8	114714401	114715400	1kb_7029	MDKO_M_1990	1000	3.64	15.24	Down	-2.07	1.66e-07	3.83e-06	0	0	0	0	0	OtherIntergenic	NA	NA	NA	NA	NA
chr8	7053801	7056800	2Kb_5703	MDKO_M_1991	3000	9.79	38.22	Down	-1.97	9.1e-09	1.85e-07	0	0	0	0	0	Genedesert	NA	NA	NA	NA	NA
chr8	130790501	130791500	1kb_7081	MDKO_M_1992	1000	3.52	13.67	Down	-1.96	4.93e-07	1.03e-05	0	0	0	0	0	OtherIntergenic	NA	NA	NA	NA	NA
[truncated: 238 more rows]

## Sheet: S6C_FDKO H3K27me3
S6C Table - Differential H3K27me3 sites in autosomes identified by diffReps comparing E1/E2-KO females to female controls. See Table S6A for details. Liver expressed genes (FPKM >1) are highlighted in green. Columns T-W show information for liver expressed genes including FPKM values in control males and females and response in the DKO Males and DKO Females compared to their sex matched controls.																			Liver expressed genes
Chrom	Start	End	ID		Length	DKOF.avg	Female.avg	Event	log2FC	pval	padj	Gene Name	Transcript	Strand	TSS	TES	Feature	D2TSS	FPKM M	FPKM F	Response in DKOM	Response in DKOF
chr1	87938501	87945000	5kb_64	DKOF_F_60	6500	86.19	38.21	Up	1.17	5.26e-12	3.02e-09	2810459M11Rik	NM_001144993	+	87942437	87952029	Promoter1k	-686.5	21.6947	16.5054	_	Down
chr1	90114901	90116500	1kb_94	DKOF_F_64	1600	51.67	19.93	Up	1.37	0.000244806	0.00642251	Ugt1a1	NM_201645	+	90108533	90116576	Genebody	7167.5	34.1299	59.2721	_	_
chr11	61157601	61159600	2kb_555	DKOF_F_209	2000	30.54	12.85	Up	1.25	7.79e-06	0.000219924	Slc47a1	NM_026183	-	61156901	61191576	Genebody	32975.5	35.6005	49.7542	_	Down
chr11	120517201	120520000	2kb_822	DKOF_F_221	2800	41.52	12.73	Up	1.71	7.88e-13	2.1e-09	Notum	NM_175263	-	120515118	120522150	Genebody	3549.5	17.2135	22.3441	_	Down
chr12	31758001	31759100	1kb_1000	DKOF_F_252	1100	17.61	5.87	Up	1.59	3.43e-06	0.000164706	Fam110c	NM_027828	+	31758832	31764804	Promoter1k	-281.5	0.157663	0.435419	Up	Up
chr13	60275601	60277600	2kb_1084	DKOF_F_283	2000	28.67	14.18	Up	1.02	1.75e-05	0.000435366	Gas1	NM_008086	-	60275765	60278895	Promoter3k	2294.5	3.59996	6.52053	Down	Down
chr13	36808001	36831000	10Kb_580	DKOF_F_287	23000	330.41	144.33	Up	1.19	2.3e-10	8.5e-09	Nrn1	NM_153529	-	36817494	36826322	Genebody	6821.5	134.335	187.875	_	Down
chr15	103307801	103310200	2kb_1430	DKOF_F_385	2400	28.37	14.02	Up	1.02	5.23e-05	0.00108074	Nckap1l	NM_153505	+	103284255	103329230	Genebody	24745.5	1.53781	2.23646	Up	_
chr16	5130801	5133600	2kb_1434	DKOF_F_414	2800	55.29	25.18	Up	1.13	4.74e-07	1.86e-05	Ppl	NM_008909	-	5086383	5132573	Promoter1k	372.5	1.78117	5.29007	Up	_
chr17	56259601	56260600	1kb_1874	DKOF_F_459	1000	16.18	4.94	Up	1.71	1.66e-06	8.76e-05	Lrg1	NM_029796	-	56259100	56261368	Promoter3k	1267.5	201.907	104.804	_	_
chr2	165977201	165979200	2kb_2269	DKOF_F_592	2000	29.39	13.68	Up	1.1	7.6e-05	0.00145265	Sulf2	NM_028072	-	165898588	165981155	Promoter3k	2954.5	3.58294	5.22829	Up	Up
chr4	128915801	128918200	2kb_2695	DKOF_F_712	2400	34.92	16.68	Up	1.07	4.22e-06	0.000129734	C77080	NM_001033189	-	128896821	128925686	Genebody	8685.5	21.5732	15.6967	Down	_
chr4	107887501	107894000	5kb_1957	DKOF_F_713	6500	80.3	37.97	Up	1.08	1.31e-09	6.37e-08	Zyg11a	NM_001167936	-	107854539	107890526	ProximalPromoter	-224.5	4.52921	2.40401	_	_
chr4	122636801	122640000	2kb_2675	DKOF_F_716	3200	46.97	21.89	Up	1.1	5.41e-07	2.1e-05	Mfsd2a	NM_029662	-	122624097	122638430	ProximalPromoter	29.5	22.7214	54.4109	Up	_
chr4	15074501	15079500	5kb_1875	DKOF_F_729	5000	58.69	18.92	Up	1.63	1.08e-12	3.02e-09	Necab1	NM_178617	-	14879393	15076277	Promoter1k	-723.5	7.50999	5.40567	Up	Up
chr4	128923701	128924700	1kb_3020	DKOF_F_730	1000	15.31	4.04	Up	1.92	5.88e-07	3.51e-05	C77080	NM_001033189	-	128896821	128925686	Promoter3k	1485.5	21.5732	15.6967	Down	_
chr5	89311001	89321000	10Kb_1674	DKOF_F_797	10000	110.06	45.58	Up	1.27	1.26e-11	2.67e-09	Slc4a4	NM_001136260	+	89316284	89668679	Promoter1k	-283.5	8.69918	12.5186	Up	Up
chr6	29666601	29668600	2kb_3103	DKOF_F_850	2000	35.63	16.68	Up	1.1	5.76e-05	0.00116772	Tspan33	NM_146173	+	29644255	29668557	Genebody	23345.5	4.22123	2.07001	Up	Up
chr7	19606201	19609000	2kb_3330	DKOF_F_927	2800	50.97	21.22	Up	1.26	3.07e-09	2.14e-07	Foxa3	NM_008260	-	19598631	19608887	Promoter3k	1286.5	30.9179	21.5383	Down	_
chr8	91564801	91566800	2kb_3782	DKOF_F_1011	2000	44.32	15.96	Up	1.47	5.27e-08	2.57e-06	Sall1	NM_021390	-	91551142	91568060	Promoter3k	2259.5	5.10602	11.2528	_	_
chr8	109188201	109190200	2kb_3815	DKOF_F_1012	2000	24.91	8.62	Up	1.53	5.9e-06	0.000173366	Cdh1	NM_009864	+	109127267	109194145	Genebody	61933.5	7.8664	5.33181	_	_
chr8	96702201	96705200	2kb_3797	DKOF_F_1015	3000	36.6	11.3	Up	1.7	6.93e-09	4.31e-07	Mt1	NM_013602	+	96702988	96704224	Promoter1k	712.5	38.9191	195.305	Up	UP
chr1	54982201	54984200	2kb_40	DKOF_F_1	2000	4.75	18.74	Down	-1.98	3.32e-08	1.7e-06	Ankrd44	NM_001081433	-	54702183	54983201	ProximalPromoter	0.5	NA	NA	NA	NA
chr1	158462801	158464200	1kb_261	DKOF_F_2	1400	4.55	16.9	Down	-1.89	3.32e-07	2.13e-05	0	0	0	0	0	OtherIntergenic	NA	NA	NA	NA	NA
chr1	145754001	145756000	2kb_182	DKOF_F_3	2000	6.23	22.36	Down	-1.84	6.48e-09	4.06e-07	0	0	0	0	0	OtherIntergenic	NA	NA	NA	NA	NA
chr1	91265301	91266300	1kb_111	DKOF_F_4	1000	3.73	12.17	Down	-1.71	6.56e-05	0.00195995	0	0	0	0	0	OtherIntergenic	NA	NA	NA	NA	NA
chr1	189306601	189308000	1kb_340	DKOF_F_5	1400	5.12	15.97	Down	-1.64	1.63e-05	0.000630964	0	0	0	0	0	OtherIntergenic	NA	NA	NA	NA	NA
chr1	38188701	38189700	1kb_17	DKOF_F_6	1000	4.13	12.83	Down	-1.64	4.47e-05	0.0014595	Rev1	NM_019570	-	38109630	38186506	Promoter3k	-2694.5	NA	NA	NA	NA
chr1	170398301	170399300	1kb_280	DKOF_F_7	1000	3.82	11.92	Down	-1.64	8.18e-05	0.00232661	0	0	0	0	0	Genedesert	NA	NA	NA	NA	NA
chr1	174340101	174341200	1kb_302	DKOF_F_8	1100	4.38	13.29	Down	-1.6	4.86e-05	0.00155123	0	0	0	0	0	OtherIntergenic	NA	NA	NA	NA	NA
chr1	182873501	182879500	5kb_194	DKOF_F_9	6000	18.35	55.33	Down	-1.59	1.24e-12	3.02e-09	Tmem63a	NM_144794	+	182872648	182905234	Genebody	3852.5	NA	NA	NA	NA
chr1	154662901	154664100	1kb_237	DKOF_F_10	1200	5.46	16.1	Down	-1.56	5.63e-05	0.00174548	Ncf2	NM_010877	+	154655019	154684119	Genebody	8481.5	NA	NA	NA	NA
chr1	163113401	163115400	2kb_206	DKOF_F_11	2000	8.95	23.74	Down	-1.41	1.03e-05	0.00028049	0	0	0	0	0	OtherIntergenic	NA	NA	NA	NA	NA
chr1	90642101	90643100	1kb_98	DKOF_F_12	1000	6.21	16.27	Down	-1.39	8.87e-05	0.00245351	0	0	0	0	0	OtherIntergenic	NA	NA	NA	NA	NA
chr1	13094101	13095100	1kb_3	DKOF_F_13	1000	6.94	18.01	Down	-1.38	6.04e-05	0.00183502	0	0	0	0	0	OtherIntergenic	NA	NA	NA	NA	NA
chr1	137094801	137095800	1kb_205	DKOF_F_14	1000	7.44	18.48	Down	-1.31	7.3e-05	0.00212375	0	0	0	0	0	OtherIntergenic	NA	NA	NA	NA	NA
chr1	174286601	174288000	1kb_301	DKOF_F_15	1400	9.5	23.38	Down	-1.3	0.000142335	0.00377863	Kcnj10	NM_001039484	+	174271340	174304215	Genebody	15960.5	NA	NA	NA	NA
chr1	169527901	169529100	1kb_279	DKOF_F_16	1200	11.23	27.42	Down	-1.29	4.05e-06	0.000190666	Rxrg	NM_009107	+	169528492	169569754	ProximalPromoter	8.5	NA	NA	NA	NA
chr1	172928201	172929200	1kb_282	DKOF_F_17	1000	8.71	21.32	Down	-1.29	4.09e-05	0.00135572	0	0	0	0	0	OtherIntergenic	NA	NA	NA	NA	NA
chr1	177620401	177622800	2kb_240	DKOF_F_18	2400	13.38	32.07	Down	-1.26	2.71e-05	0.000632159	Opn3	NM_010098	-	177592558	177622720	Promoter3k	1119.5	NA	NA	NA	NA
chr1	145777001	145814000	10Kb_105	DKOF_F_19	37000	210.03	500.66	Down	-1.25	2.46e-10	9.04e-09	0	0	0	0	0	OtherIntergenic	NA	NA	NA	NA	NA
chr1	141351301	141352600	1kb_221	DKOF_F_20	1300	7.65	18.23	Down	-1.25	7.23e-05	0.00210952	Aspm	NM_009791	+	141351349	141390664	Promoter1k	601.5	NA	NA	NA	NA
chr1	158366001	158455000	10Kb_114	DKOF_F_21	89000	480.49	1134.32	Down	-1.24	2.62e-10	9.55e-09	0	0	0	0	0	OtherIntergenic	NA	NA	NA	NA	NA
chr1	128493001	128531000	10Kb_82	DKOF_F_22	38000	190.81	449.74	Down	-1.24	1.28e-09	4.02e-08	Nckap5	NM_001081756	-	127810212	128727208	Genebody	215208	NA	NA	NA	NA
chr1	120983001	121252000	10Kb_78	DKOF_F_23	269000	1423.8	3304.59	Down	-1.21	1.62e-09	4.99e-08	0	0	0	0	0	OtherIntergenic	NA	NA	NA	NA	NA
chr1	155377801	155379800	2kb_191	DKOF_F_24	2000	9.09	20.46	Down	-1.17	5.41e-05	0.00111119	Npl	NM_028749	-	155350145	155396843	Genebody	18042.5	NA	NA	NA	NA
chr1	52285001	52293500	5kb_35	DKOF_F_25	8500	32.83	73.59	Down	-1.16	4.23e-10	2.31e-08	Gls	NM_001113383	-	52242124	52290075	Promoter1k	824.5	NA	NA	NA	NA
chr1	43501501	43506500	5kb_33	DKOF_F_26	5000	23.9	53.08	Down	-1.15	3.31e-07	9.32e-06	Nck2	NM_010879	+	43502595	43627362	Promoter3k	1405.5	NA	NA	NA	NA
chr1	167250201	167252200	2kb_211	DKOF_F_27	2000	9.93	21.76	Down	-1.13	9.69e-05	0.00176375	Gpr161	NM_001081126	+	167225896	167251981	Genebody	25304.5	NA	NA	NA	NA
chr1	173955601	173959000	2kb_233	DKOF_F_28	3400	21.43	46.52	Down	-1.12	2.32e-06	7.72e-05	Vangl2	NM_033509	-	173934501	173957398	ProximalPromoter	97.5	NA	NA	NA	NA
chr1	52226601	52229200	2kb_37	DKOF_F_29	2600	13.58	29.43	Down	-1.12	2.34e-06	7.78e-05	Gls	NM_001081081	-	52220293	52290075	Genebody	62174.5	NA	NA	NA	NA
chr1	79669001	79670200	1kb_86	DKOF_F_30	1200	9.44	20.31	Down	-1.11	0.000146158	0.00387765	Ap1s3	NM_183027	-	79603450	79668546	Promoter3k	-1054.5	NA	NA	NA	NA
chr1	79577201	79579200	2kb_73	DKOF_F_31	2000	13.23	28.35	Down	-1.1	3.72e-05	0.000826721	0	0	0	0	0	OtherIntergenic	NA	NA	NA	NA	NA
chr1	137684601	137686800	2kb_171	DKOF_F_32	2200	12.48	26.7	Down	-1.1	2.6e-05	0.000609665	0	0	0	0	0	OtherIntergenic	NA	NA	NA	NA	NA
chr1	95579801	95582400	2kb_105	DKOF_F_33	2600	15.28	32.25	Down	-1.08	1.61e-05	0.000407725	Bok	NM_016778	+	95582270	95592338	Promoter3k	-1169.5	NA	NA	NA	NA
chr1	94745801	94747800	2kb_102	DKOF_F_34	2000	14.74	31.13	Down	-1.08	1.92e-05	0.000473116	Gpc1	NM_016696	+	94728262	94756772	Genebody	18538.5	NA	NA	NA	NA
chr1	17089501	17090600	1kb_5	DKOF_F_35	1100	11.24	23.83	Down	-1.08	4.31e-05	0.00141553	Jph1	NM_020604	-	16987544	17087878	Promoter3k	-2172.5	NA	NA	NA	NA
chr1	95073201	95074200	1kb_125	DKOF_F_36	1000	10.99	23.17	Down	-1.08	8.34e-05	0.00235901	0	0	0	0	0	OtherIntergenic	NA	NA	NA	NA	NA
chr1	182817601	182820000	2kb_252	DKOF_F_37	2400	17.56	36.8	Down	-1.07	7.89e-06	0.000222211	0	0	0	0	0	OtherIntergenic	NA	NA	NA	NA	NA
chr1	69832801	69835000	2kb_52	DKOF_F_38	2200	10.86	22.79	Down	-1.07	3.46e-05	0.000777445	0	0	0	0	0	OtherIntergenic	NA	NA	NA	NA	NA
chr1	134972801	134974800	2kb_153	DKOF_F_39	2000	10.78	22.57	Down	-1.07	7.79e-05	0.00148193	Pik3c2b	NM_001099276	+	134942588	135005264	Genebody	31212.5	NA	NA	NA	NA
chr1	75673001	75703000	10Kb_48	DKOF_F_40	30000	150.61	313.6	Down	-1.06	7.21e-11	3.54e-09	0	0	0	0	0	Genedesert	NA	NA	NA	NA	NA
chr1	62949201	62951600	2kb_49	DKOF_F_41	2400	17.06	35.66	Down	-1.06	5.52e-05	0.0011292	0	0	0	0	0	OtherIntergenic	NA	NA	NA	NA	NA
chr1	39671801	39674200	2kb_21	DKOF_F_42	2400	14.74	30.63	Down	-1.06	5.75e-05	0.00116614	0	0	0	0	0	OtherIntergenic	NA	NA	NA	NA	NA
chr1	189409401	189411600	2kb_268	DKOF_F_43	2200	12.04	24.97	Down	-1.05	6.46e-05	0.00128007	0	0	0	0	0	OtherIntergenic	NA	NA	NA	NA	NA
chr1	188655401	188656600	1kb_337	DKOF_F_44	1200	9.59	19.84	Down	-1.05	0.000211357	0.00556249	0	0	0	0	0	OtherIntergenic	NA	NA	NA	NA	NA
chr1	173178001	173186000	5kb_172	DKOF_F_45	8000	36.11	74.42	Down	-1.04	2.4e-05	0.00041854	Adamts4	NM_172845	+	173180552	173190052	Promoter3k	1448.5	NA	NA	NA	NA
chr1	39835401	39838000	2kb_25	DKOF_F_46	2600	13.85	28.45	Down	-1.04	0.000444832	0.00769547	0	0	0	0	0	OtherIntergenic	NA	NA	NA	NA	NA
chr1	191485001	191490500	5kb_203	DKOF_F_47	5500	22.69	46.19	Down	-1.03	9.84e-08	3.09e-06	Cenpf	NM_001081363	-	191464492	191511964	Genebody	24213.5	NA	NA	NA	NA
chr1	183810001	183813000	2kb_260	DKOF_F_48	3000	15.34	31.29	Down	-1.03	0.000104896	0.00189566	0	0	0	0	0	OtherIntergenic	NA	NA	NA	NA	NA
chr1	183369001	183371000	2kb_258	DKOF_F_49	2000	14.45	29.57	Down	-1.03	1.75e-05	0.000435366	Cnih3	NM_001160212	+	183282758	183390771	Genebody	87242.5	NA	NA	NA	NA
chr1	90814001	90871000	10Kb_63	DKOF_F_50	57000	329.47	668.99	Down	-1.02	1.58e-10	6.17e-09	0	0	0	0	0	OtherIntergenic	NA	NA	NA	NA	NA
chr1	36606001	36626000	10Kb_10	DKOF_F_51	20000	92.75	187.36	Down	-1.01	4.53e-09	1.27e-07	Sema4c	NM_001126047	-	36605486	36615225	Promoter1k	-775.5	NA	NA	NA	NA
chr1	39117001	39125500	5kb_20	DKOF_F_52	8500	39.84	80.23	Down	-1.01	1.29e-07	3.97e-06	0	0	0	0	0	OtherIntergenic	NA	NA	NA	NA	NA
chr1	155395401	155398000	2kb_192	DKOF_F_53	2600	16.66	33.6	Down	-1.01	1.56e-05	0.000395896	Npl	NM_028749	-	155350145	155396843	ProximalPromoter	142.5	NA	NA	NA	NA
chr1	72991001	72993400	2kb_55	DKOF_F_54	2400	18.22	36.54	Down	-1	2.02e-06	6.82e-05	0	0	0	0	0	OtherIntergenic	NA	NA	NA	NA	NA
chr1	34802201	34804400	2kb_10	DKOF_F_55	2200	29.6	14.51	Up	1.03	3.18e-05	0.000723339	0	0	0	0	0	OtherIntergenic	NA	NA	NA	NA	NA
chr1	173510601	173513000	2kb_232	DKOF_F_56	2400	49.22	23.19	Up	1.09	2.16e-05	0.000522054	Cd244	NM_018729	+	173489323	173515446	Genebody	22477.5	NA	NA	NA	NA
chr1	177137001	177144000	5kb_183	DKOF_F_57	7000	81.79	37.31	Up	1.13	6.94e-08	2.23e-06	Rgs7	NM_011880	-	176989206	177422675	Genebody	282174	NA	NA	NA	NA
chr1	135258801	135261200	2kb_156	DKOF_F_58	2400	44.34	20.18	Up	1.14	8.42e-06	0.000234486	Etnk2	NM_175443	+	135260148	135276894	ProximalPromoter	-147.5	NA	NA	NA	NA
chr1	33744801	33747000	2kb_5	DKOF_F_59	2200	31.99	14.55	Up	1.14	1.32e-05	0.000342998	0	0	0	0	0	OtherIntergenic	NA	NA	NA	NA	NA
chr1	179246001	179248000	2kb_242	DKOF_F_61	2000	25.23	10.61	Up	1.25	1.34e-05	0.000347428	0	0	0	0	0	OtherIntergenic	NA	NA	NA	NA	NA
chr1	89407801	89410000	2kb_81	DKOF_F_62	2200	29.05	12.14	Up	1.26	1.74e-06	5.97e-05	Ngef	NM_001111314	-	89373403	89470444	Genebody	61543.5	NA	NA	NA	NA
chr1	173470001	173520000	10Kb_127	DKOF_F_63	50000	787.15	317.01	Up	1.31	2.93e-05	0.000396515	Cd244	NM_018729	+	173489323	173515446	Genebody	5677.5	NA	NA	NA	NA
chr1	108754201	108756200	2kb_110	DKOF_F_65	2000	23.19	8.82	Up	1.39	2.01e-05	0.000491069	Serpinb5	NM_009257	+	108757756	108779924	Promoter3k	-2555.5	NA	NA	NA	NA
chr1	173443501	173449500	5kb_174	DKOF_F_66	6000	72.58	26.29	Up	1.47	1.74e-05	0.000319313	0	0	0	0	0	OtherIntergenic	NA	NA	NA	NA	NA
chr1	173453001	173468000	10Kb_126	DKOF_F_67	15000	194.03	69.59	Up	1.48	8.05e-06	0.000124617	Itln1	NM_010584	-	173448254	173465423	Genebody	4922.5	NA	NA	NA	NA
chr1	22818001	22820200	2kb_4	DKOF_F_68	2200	27.07	9.46	Up	1.52	1.14e-05	0.000303476	0	0	0	0	0	OtherIntergenic	NA	NA	NA	NA	NA
chr1	135224401	135226800	2kb_155	DKOF_F_69	2400	30.84	9.17	Up	1.75	9.2e-11	9.21e-09	Kiss1	NM_178260	+	135223788	135226298	Promoter3k	1812.5	NA	NA	NA	NA
chr1	191997201	191998300	1kb_347	DKOF_F_70	1100	16.85	4.91	Up	1.78	1.4e-06	7.56e-05	0	0	0	0	0	OtherIntergenic	NA	NA	NA	NA	NA
chr10	7589901	7591000	1kb_361	DKOF_F_71	1100	3.47	13.13	Down	-1.92	7.18e-06	0.000313401	Zc3h12d	NM_172785	+	7552267	7590193	Genebody	38183.5	NA	NA	NA	NA
chr10	119637601	119638900	1kb_533	DKOF_F_72	1300	4.35	16.1	Down	-1.89	2.01e-05	0.000756004	Irak3	NM_028679	-	119578709	119638592	Promoter1k	341.5	NA	NA	NA	NA
chr10	43171501	43172500	1kb_406	DKOF_F_73	1000	4.16	15.4	Down	-1.89	1.53e-06	8.19e-05	Pdss2	NM_001168289	+	42941291	43184687	Genebody	230710	NA	NA	NA	NA
chr10	93857301	93858300	1kb_502	DKOF_F_74	1000	3.39	11.92	Down	-1.81	4.82e-05	0.00154769	0	0	0	0	0	OtherIntergenic	NA	NA	NA	NA	NA
chr10	76683101	76684100	1kb_441	DKOF_F_75	1000	3.78	12.4	Down	-1.71	6.71e-05	0.00199743	0	0	0	0	0	OtherIntergenic	NA	NA	NA	NA	NA
chr10	59403801	59406600	2kb_331	DKOF_F_76	2800	11.23	34.92	Down	-1.64	6.01e-07	2.32e-05	0	0	0	0	0	OtherIntergenic	NA	NA	NA	NA	NA
chr10	94367901	94368900	1kb_516	DKOF_F_77	1000	4.59	13.95	Down	-1.61	7.49e-05	0.0021638	Plxnc1	NM_018797	-	94253611	94407211	Genebody	38810.5	NA	NA	NA	NA
chr10	36847001	36871000	10Kb_168	DKOF_F_78	24000	92.09	278.26	Down	-1.6	4.05e-11	2.72e-09	Marcks	NM_008538	-	36853048	36858731	Promoter1k	-269.5	NA	NA	NA	NA
chr10	87914701	87915800	1kb_495	DKOF_F_79	1100	5.19	15.31	Down	-1.56	7.41e-05	0.00214706	0	0	0	0	0	OtherIntergenic	NA	NA	NA	NA	NA
chr10	59432001	59437500	5kb_252	DKOF_F_80	5500	19.19	55.16	Down	-1.52	2.49e-10	1.44e-08	0	0	0	0	0	OtherIntergenic	NA	NA	NA	NA	NA
chr10	62890701	62892200	1kb_425	DKOF_F_81	1500	5.4	15.42	Down	-1.51	3.02e-05	0.00105781	Ctnna3	NM_177612	+	62892845	64466414	Promoter3k	-1394.5	NA	NA	NA	NA
chr10	62564401	62565400	1kb_424	DKOF_F_82	1000	5.46	15.01	Down	-1.46	2.34e-05	0.000854985	0	0	0	0	0	OtherIntergenic	NA	NA	NA	NA	NA
chr10	41741301	41742400	1kb_403	DKOF_F_83	1100	5.63	14.82	Down	-1.39	6.93e-05	0.00204293	0	0	0	0	0	OtherIntergenic	NA	NA	NA	NA	NA
chr10	117341601	117343800	2kb_432	DKOF_F_84	2200	8.98	23.43	Down	-1.38	2e-06	6.78e-05	0	0	0	0	0	OtherIntergenic	NA	NA	NA	NA	NA
chr10	87789201	87790400	1kb_492	DKOF_F_85	1200	7.55	19.71	Down	-1.38	1.32e-05	0.00052342	Dram1	NM_027878	-	87785548	87819819	Genebody	30018.5	NA	NA	NA	NA
chr10	61963201	61965200	2kb_340	DKOF_F_86	2000	7.19	18.74	Down	-1.38	6.69e-05	0.00131692	Srgn	NM_011157	-	61957175	61970502	Genebody	6301.5	NA	NA	NA	NA
chr10	107183801	107184800	1kb_526	DKOF_F_87	1000	6.4	16.59	Down	-1.38	3.29e-05	0.00113579	0	0	0	0	0	OtherIntergenic	NA	NA	NA	NA	NA
chr10	94031001	94036500	5kb_324	DKOF_F_88	5500	20.5	51.71	Down	-1.33	2.63e-11	3.07e-09	Tmcc3	NM_172051	+	93977601	94053698	Genebody	56149.5	NA	NA	NA	NA
chr10	92723201	92726000	2kb_405	DKOF_F_89	2800	9.66	24.03	Down	-1.31	1.71e-05	0.000428818	Elk3	NM_013508	-	92710160	92773903	Genebody	49302.5	NA	NA	NA	NA
chr10	79445001	79461000	10Kb_205	DKOF_F_90	16000	48.73	119.15	Down	-1.29	2.01e-11	2.67e-09	Cnn2	NM_007725	+	79451344	79458144	Promoter3k	1656.5	NA	NA	NA	NA
chr10	75805601	75807800	2kb_356	DKOF_F_91	2200	9.59	23.13	Down	-1.27	1.03e-05	0.000280618	Dip2a	NM_001081419	-	75725793	75808006	Promoter3k	1305.5	NA	NA	NA	NA
chr10	86311001	86316000	5kb_309	DKOF_F_92	5000	19.96	47.22	Down	-1.24	6.42e-10	3.37e-08	Stab2	NM_138673	-	86303954	86470686	Genebody	157186	NA	NA	NA	NA
chr10	86826001	86839000	10Kb_220	DKOF_F_93	13000	47	110.43	Down	-1.23	1.7e-11	2.67e-09	0	0	0	0	0	OtherIntergenic	NA	NA	NA	NA	NA
chr10	99493201	99495600	2kb_423	DKOF_F_94	2400	10.53	24.68	Down	-1.23	3.18e-05	0.000722856	Kitl	NM_013598	+	99478457	99563044	Genebody	15943.5	NA	NA	NA	NA
chr10	37115801	37119000	2kb_314	DKOF_F_95	3200	14.15	33	Down	-1.22	3.56e-07	1.44e-05	0	0	0	0	0	Genedesert	NA	NA	NA	NA	NA
chr10	79642101	79643100	1kb_460	DKOF_F_96	1000	11.32	26.39	Down	-1.22	4.41e-06	0.000205285	Efna2	NM_007909	+	79642226	79652752	Promoter1k	374.5	NA	NA	NA	NA
chr10	92737601	92740600	2kb_406	DKOF_F_97	3000	12.48	28.93	Down	-1.21	5.03e-06	0.000151281	Elk3	NM_013508	-	92710160	92773903	Genebody	34802.5	NA	NA	NA	NA
chr10	86813201	86815400	2kb_396	DKOF_F_98	2200	9.31	21.28	Down	-1.19	8.56e-05	0.00159802	0	0	0	0	0	OtherIntergenic	NA	NA	NA	NA	NA
chr10	21871501	21880500	5kb_222	DKOF_F_99	9000	34.06	77.35	Down	-1.18	6.94e-06	0.000142648	Raet1a	NM_009016	+	21878414	22093944	Promoter3k	-2413.5	NA	NA	NA	NA
chr10	93901001	93972000	10Kb_229	DKOF_F_100	71000	368.52	826.84	Down	-1.17	1.71e-10	6.55e-09	0	0	0	0	0	OtherIntergenic	NA	NA	NA	NA	NA
chr10	24919001	24921200	2kb_298	DKOF_F_101	2200	13.05	28.92	Down	-1.15	5.52e-06	0.000163673	Akap7	NM_018747	-	24888895	25018968	Genebody	98867.5	NA	NA	NA	NA
chr10	86782001	86804000	10Kb_219	DKOF_F_102	22000	101.58	223.61	Down	-1.14	8.4e-08	1.86e-06	0	0	0	0	0	OtherIntergenic	NA	NA	NA	NA	NA
chr10	36938001	37014000	10Kb_169	DKOF_F_103	76000	350.55	769.48	Down	-1.13	4.3e-10	1.48e-08	0	0	0	0	0	Genedesert	NA	NA	NA	NA	NA
chr10	25076501	25085000	5kb_225	DKOF_F_104	8500	31.63	69.15	Down	-1.13	6.65e-10	3.46e-08	0	0	0	0	0	OtherIntergenic	NA	NA	NA	NA	NA
chr10	126673801	126674800	1kb_552	DKOF_F_105	1000	9.65	21.18	Down	-1.13	8.53e-05	0.00239865	Kif5a	NM_008447	-	126666105	126700135	Genebody	25834.5	NA	NA	NA	NA
chr10	80296801	80298300	1kb_466	DKOF_F_106	1500	18.46	39.82	Down	-1.11	3.62e-06	0.000172821	Lingo3	NM_001013758	-	80295548	80306783	Genebody	9232.5	NA	NA	NA	NA
chr10	92888001	92898000	10Kb_226	DKOF_F_107	10000	44.51	94.49	Down	-1.09	2.35e-10	8.7e-09	0	0	0	0	0	OtherIntergenic	NA	NA	NA	NA	NA
chr10	37032001	37067000	10Kb_170	DKOF_F_108	35000	152.6	314.56	Down	-1.04	2.21e-09	6.56e-08	0	0	0	0	0	Genedesert	NA	NA	NA	NA	NA
chr10	126526701	126527700	1kb_546	DKOF_F_109	1000	15.3	31.55	Down	-1.04	4.55e-05	0.00147952	Agap2	NM_001033263	+	126515962	126530224	Genebody	11238.5	NA	NA	NA	NA
chr10	119565601	119567800	2kb_433	DKOF_F_110	2200	15.02	30.89	Down	-1.04	1.73e-05	0.00043289	0	0	0	0	0	OtherIntergenic	NA	NA	NA	NA	NA
chr10	125280801	125282800	2kb_443	DKOF_F_111	2000	12.01	24.74	Down	-1.04	8.5e-05	0.00158961	0	0	0	0	0	OtherIntergenic	NA	NA	NA	NA	NA
chr10	116826201	116829000	2kb_428	DKOF_F_112	2800	15.73	32.1	Down	-1.03	3.63e-05	0.00081076	0	0	0	0	0	OtherIntergenic	NA	NA	NA	NA	NA
chr10	66277001	66279400	2kb_343	DKOF_F_113	2400	14.89	30.33	Down	-1.03	2.45e-05	0.000580581	0	0	0	0	0	Genedesert	NA	NA	NA	NA	NA
chr10	97993001	98010000	10Kb_231	DKOF_F_114	17000	72.07	146.5	Down	-1.02	3.22e-08	7.67e-07	0	0	0	0	0	Genedesert	NA	NA	NA	NA	NA
chr10	98299501	98305500	5kb_328	DKOF_F_115	6000	29.96	60.6	Down	-1.02	2.18e-05	0.000383724	0	0	0	0	0	Genedesert	NA	NA	NA	NA	NA
chr10	21707501	21713500	5kb_221	DKOF_F_116	6000	26.17	53.08	Down	-1.02	4.31e-08	1.47e-06	Sgk1	NM_001161848	+	21705909	21719705	Genebody	4591.5	NA	NA	NA	NA
chr10	78041001	78073000	10Kb_198	DKOF_F_117	32000	196.6	393.81	Down	-1	1.27e-10	5.14e-09	Syde1	NM_027875	-	78047247	78054708	Promoter3k	-2292.5	NA	NA	NA	NA
chr10	76086001	76088000	2kb_357	DKOF_F_118	2000	16.26	32.53	Down	-1	3.04e-05	0.000697002	Col6a2	NM_146007	-	76058500	76086148	Promoter1k	-852.5	NA	NA	NA	NA
chr10	40603201	40606000	2kb_317	DKOF_F_119	2800	38.44	19.2	Up	1	4.56e-06	0.000139301	Wasf1	NM_031877	+	40603339	40658374	Promoter3k	1261.5	NA	NA	NA	NA
chr10	18562801	18564800	2kb_285	DKOF_F_120	2000	27.27	12.88	Up	1.08	3.32e-05	0.000751368	Perp	NM_022032	+	18564876	18576877	Promoter3k	-1075.5	NA	NA	NA	NA
chr10	119674801	119676800	2kb_434	DKOF_F_121	2000	27.81	12.82	Up	1.12	5.3e-05	0.00109316	0	0	0	0	0	OtherIntergenic	NA	NA	NA	NA	NA
chr10	60385201	60387200	2kb_335	DKOF_F_122	2000	25.2	11.49	Up	1.13	1.52e-05	0.000388063	0	0	0	0	0	OtherIntergenic	NA	NA	NA	NA	NA
chr10	58405501	58410500	5kb_250	DKOF_F_123	5000	50.71	22.11	Up	1.2	6.23e-08	2.05e-06	Sh3rf3	NM_172788	+	58276106	58601663	Genebody	131894	NA	NA	NA	NA
chr10	81635801	81637800	2kb_386	DKOF_F_124	2000	25.17	10.15	Up	1.31	1.64e-06	5.67e-05	0	0	0	0	0	OtherIntergenic	NA	NA	NA	NA	NA
chr10	104554801	104556800	2kb_424	DKOF_F_125	2000	27	10.85	Up	1.32	1.27e-06	4.48e-05	0	0	0	0	0	Genedesert	NA	NA	NA	NA	NA
chr10	128025201	128026300	1kb_563	DKOF_F_126	1100	16.84	6.12	Up	1.46	1.19e-05	0.000482035	Erbb3	NM_010153	-	128006423	128026556	Promoter1k	805.5	NA	NA	NA	NA
chr10	80740001	80745500	5kb_297	DKOF_F_127	5500	62.97	22.58	Up	1.48	1.46e-12	3.02e-09	Tjp3	NM_013769	-	80735944	80754011	Genebody	11260.5	NA	NA	NA	NA
chr10	69388201	69389200	1kb_433	DKOF_F_128	1000	14.72	5.24	Up	1.49	5.87e-05	0.00181085	Ank3	NM_170687	+	69388279	69490183	Promoter1k	421.5	NA	NA	NA	NA
chr10	18565201	18567200	2kb_286	DKOF_F_129	2000	30.52	10.6	Up	1.53	4.28e-08	2.15e-06	Perp	NM_022032	+	18564876	18576877	Promoter3k	1324.5	NA	NA	NA	NA
chr10	90225701	90226700	1kb_496	DKOF_F_130	1000	14.83	4.83	Up	1.62	6.62e-05	0.00197525	Anks1b	NM_001128086	+	89336253	90436048	Genebody	889948	NA	NA	NA	NA
chr10	83240401	83241500	1kb_476	DKOF_F_131	1100	16.23	4.34	Up	1.9	1.45e-06	7.81e-05	0	0	0	0	0	OtherIntergenic	NA	NA	NA	NA	NA
chr11	54693301	54694300	1kb_648	DKOF_F_132	1000	2.27	10.75	Down	-2.24	2.77e-06	0.000137153	0	0	0	0	0	OtherIntergenic	NA	NA	NA	NA	NA
chr11	68860101	68861100	1kb_707	DKOF_F_133	1000	2.45	9.85	Down	-2.01	3.69e-05	0.00124753	Aurkb	NM_011496	+	68859144	68865163	Promoter3k	1456.5	NA	NA	NA	NA
chr11	88252601	88253600	1kb_796	DKOF_F_134	1000	2.92	11.35	Down	-1.96	7.37e-06	0.00032105	Msi2	NM_054043	-	88152883	88579542	Genebody	326442	NA	NA	NA	NA
chr11	100300801	100302800	2kb_729	DKOF_F_135	2000	5.01	18.76	Down	-1.91	1.77e-08	9.91e-07	Nt5c3l	NM_001102650	-	100290665	100302402	Promoter1k	601.5	NA	NA	NA	NA
chr11	106571101	106572100	1kb_914	DKOF_F_136	1000	3.52	12.85	Down	-1.87	9.11e-06	0.000384839	Pecam1	NM_008816	-	106515531	106576594	Genebody	4993.5	NA	NA	NA	NA
chr11	88820001	88839000	10Kb_363	DKOF_F_137	19000	44.92	160.02	Down	-1.83	1.42e-11	2.67e-09	Gm15698	NR_003564	-	88825980	88828230	Promoter3k	-1270.5	NA	NA	NA	NA
chr11	20815201	20816200	1kb_596	DKOF_F_138	1000	3.52	12.55	Down	-1.83	1.87e-05	0.000708446	0	0	0	0	0	OtherIntergenic	NA	NA	NA	NA	NA
chr11	88370901	88371900	1kb_798	DKOF_F_139	1000	3.82	13.45	Down	-1.82	1.14e-05	0.000467079	Msi2	NM_054043	-	88152883	88579542	Genebody	208142	NA	NA	NA	NA
chr11	76249901	76251000	1kb_740	DKOF_F_140	1100	3.96	13.32	Down	-1.75	1.04e-05	0.000429776	Abr	NM_198018	-	76230235	76322920	Genebody	72469.5	NA	NA	NA	NA
chr11	74970001	74996000	10Kb_330	DKOF_F_141	26000	126.33	407.07	Down	-1.69	2.63e-10	9.57e-09	Hic1	NM_010430	-	74978066	74983756	Promoter1k	755.5	NA	NA	NA	NA
chr11	102785201	102786600	1kb_894	DKOF_F_142	1400	4.26	13.65	Down	-1.68	1.46e-05	0.000572582	Kif18b	NM_197959	-	102766832	102786437	Promoter1k	536.5	NA	NA	NA	NA
chr11	98884001	98885200	1kb_853	DKOF_F_143	1200	4.51	14.14	Down	-1.65	2.69e-05	0.00095869	Top2a	NM_011623	-	98854260	98885502	Promoter1k	901.5	NA	NA	NA	NA
chr11	50050201	50053000	2kb_521	DKOF_F_144	2800	9.78	30.21	Down	-1.63	2.53e-08	1.34e-06	Ltc4s	NM_008521	-	50049973	50051972	Promoter1k	371.5	NA	NA	NA	NA
chr11	61466001	61467400	1kb_675	DKOF_F_145	1400	4.68	14.55	Down	-1.63	1.34e-05	0.000531369	Grap	NM_027817	+	61466822	61486278	ProximalPromoter	-121.5	NA	NA	NA	NA
chr11	97522401	97523600	1kb_838	DKOF_F_146	1200	5.85	17.52	Down	-1.58	4.93e-06	0.000225318	Mllt6	NM_139311	+	97524725	97546771	Promoter3k	-1724.5	NA	NA	NA	NA
chr11	106518001	106528000	10Kb_414	DKOF_F_147	10000	29.77	85.82	Down	-1.53	2.15e-12	2.67e-09	Pecam1	NM_008816	-	106515531	106576594	Genebody	53593.5	NA	NA	NA	NA
chr11	68221001	68222100	1kb_703	DKOF_F_148	1100	5.13	14.85	Down	-1.53	1.79e-05	0.000684068	0	0	0	0	0	OtherIntergenic	NA	NA	NA	NA	NA
chr11	43006501	43007700	1kb_617	DKOF_F_149	1200	5.2	14.85	Down	-1.51	0.000106963	0.00286456	Atp10b	NM_176999	+	42963378	43075786	Genebody	43722.5	NA	NA	NA	NA
chr11	105211701	105212700	1kb_904	DKOF_F_150	1000	4.9	13.9	Down	-1.5	5.45e-05	0.00170405	Mrc2	NM_008626	+	105153959	105212458	Genebody	58241.5	NA	NA	NA	NA
chr11	11362201	11363200	1kb_583	DKOF_F_151	1000	6.06	17.06	Down	-1.49	9.48e-05	0.0025828	Zpbp	NM_015785	-	11182515	11362410	Promoter1k	-290.5	NA	NA	NA	NA
chr11	100489701	100490700	1kb_876	DKOF_F_152	1000	4.99	13.7	Down	-1.46	9.92e-05	0.00267246	Zfp385c	NM_177790	-	100487533	100512006	Genebody	21805.5	NA	NA	NA	NA
chr11	87973801	87975100	1kb_785	DKOF_F_153	1300	5.79	15.72	Down	-1.44	0.000205781	0.00542031	Cuedc1	NM_198013	+	87912647	88007640	Genebody	61803.5	NA	NA	NA	NA
chr11	101037901	101038900	1kb_883	DKOF_F_154	1000	8.25	22.1	Down	-1.42	6.9e-05	0.00204293	Cntnap1	NM_016782	+	101037430	101052033	Promoter1k	970.5	NA	NA	NA	NA
chr11	97002001	97023000	10Kb_378	DKOF_F_155	21000	85.51	227.62	Down	-1.41	4.26e-11	2.72e-09	Tbkbp1	NM_198100	-	96997484	97011025	Promoter3k	-1475.5	NA	NA	NA	NA
chr11	116291701	116292800	1kb_947	DKOF_F_156	1100	5.93	15.72	Down	-1.41	3.84e-05	0.00128788	0	0	0	0	0	OtherIntergenic	NA	NA	NA	NA	NA
chr11	106576001	106578200	2kb_766	DKOF_F_157	2200	8.67	22.56	Down	-1.38	1.56e-06	5.43e-05	Pecam1	NM_008816	-	106515531	106576594	Promoter1k	-506.5	NA	NA	NA	NA
chr11	44394401	44396400	2kb_515	DKOF_F_158	2000	7.62	19.84	Down	-1.38	8.63e-06	0.000239369	0	0	0	0	0	OtherIntergenic	NA	NA	NA	NA	NA
chr11	116504901	116505900	1kb_948	DKOF_F_159	1000	6.95	17.99	Down	-1.37	6.54e-05	0.00195824	0	0	0	0	0	OtherIntergenic	NA	NA	NA	NA	NA
chr11	3436401	3438800	2kb_462	DKOF_F_160	2400	9.85	24.93	Down	-1.34	1.66e-06	5.73e-05	Smtn	NM_013870	-	3417525	3439294	Promoter3k	1693.5	NA	NA	NA	NA
chr11	62746201	62748400	2kb_567	DKOF_F_161	2200	9.65	24.3	Down	-1.33	1.44e-05	0.000368947	0	0	0	0	0	OtherIntergenic	NA	NA	NA	NA	NA
chr11	61224301	61225400	1kb_667	DKOF_F_162	1100	7.4	18.64	Down	-1.33	2.82e-05	0.000997313	0	0	0	0	0	OtherIntergenic	NA	NA	NA	NA	NA
chr11	106606001	106623000	10Kb_415	DKOF_F_163	17000	58.14	144.77	Down	-1.32	1.04e-11	2.67e-09	Gm885	NM_001033435	+	106612581	106628881	Promoter3k	1919.5	NA	NA	NA	NA
chr11	113479101	113480100	1kb_931	DKOF_F_164	1000	8.64	21.61	Down	-1.32	1.75e-05	0.000672121	0	0	0	0	0	OtherIntergenic	NA	NA	NA	NA	NA
chr11	4195601	4196700	1kb_576	DKOF_F_165	1100	7.82	19.24	Down	-1.3	2.84e-05	0.00100179	0	0	0	0	0	OtherIntergenic	NA	NA	NA	NA	NA
chr11	88186001	88227000	10Kb_359	DKOF_F_166	41000	213.42	508.89	Down	-1.25	1.05e-10	4.45e-09	Msi2	NM_054043	-	88152883	88579542	Genebody	373042	NA	NA	NA	NA
chr11	116180201	116181400	1kb_944	DKOF_F_167	1200	7.54	17.77	Down	-1.24	0.00015022	0.00398203	0	0	0	0	0	OtherIntergenic	NA	NA	NA	NA	NA
chr11	35023601	35025800	2kb_499	DKOF_F_168	2200	10.35	24.27	Down	-1.23	3.49e-06	0.00010998	Slit3	NM_011412	+	34934957	35522004	Genebody	89743.5	NA	NA	NA	NA
chr11	109507001	109514000	5kb_561	DKOF_F_169	7000	22.47	51.56	Down	-1.2	4.69e-09	2.02e-07	Prkar1a	NM_021880	+	109512262	109530961	Promoter3k	-1761.5	NA	NA	NA	NA
chr11	79681001	79686500	5kb_460	DKOF_F_170	5500	20.94	48.18	Down	-1.2	5.33e-09	2.27e-07	0	0	0	0	0	OtherIntergenic	NA	NA	NA	NA	NA
chr11	23949801	23950800	1kb_599	DKOF_F_171	1000	10.34	23.75	Down	-1.2	1.64e-05	0.000633019	0	0	0	0	0	OtherIntergenic	NA	NA	NA	NA	NA
chr11	101016401	101019000	2kb_733	DKOF_F_172	2600	12.98	29.64	Down	-1.19	1.22e-06	4.34e-05	Tubg2	NM_134028	+	101017197	101023099	Promoter1k	503.5	NA	NA	NA	NA
chr11	88460001	88494000	10Kb_361	DKOF_F_173	34000	167	369.47	Down	-1.15	2.85e-08	6.92e-07	Msi2	NM_054043	-	88152883	88579542	Genebody	102542	NA	NA	NA	NA
chr11	103211001	103234000	10Kb_409	DKOF_F_174	23000	142.89	317.74	Down	-1.15	5.14e-10	1.73e-08	Sh3d20	NM_183288	-	103221050	103224697	Promoter3k	2196.5	NA	NA	NA	NA
chr11	120622201	120625200	2kb_823	DKOF_F_175	3000	10.57	23.46	Down	-1.15	4.57e-05	0.000972327	0	0	0	0	0	OtherIntergenic	NA	NA	NA	NA	NA
chr11	115721501	115722500	1kb_940	DKOF_F_176	1000	11.1	24.4	Down	-1.14	3.37e-05	0.00115564	0	0	0	0	0	OtherIntergenic	NA	NA	NA	NA	NA
chr11	43358801	43361000	2kb_506	DKOF_F_177	2200	10.57	23.38	Down	-1.14	1.73e-05	0.00043289	Ccnjl	NM_001045530	+	43342285	43400498	Genebody	17615.5	NA	NA	NA	NA
chr11	117641501	117649000	5kb_586	DKOF_F_178	7500	30.03	65.2	Down	-1.12	3.36e-10	1.88e-08	Tmc8	NM_181856	+	117644363	117654341	Promoter1k	887.5	NA	NA	NA	NA
chr11	106226001	106228000	2kb_763	DKOF_F_179	2000	15.84	34.52	Down	-1.12	6.39e-05	0.00126957	0	0	0	0	0	OtherIntergenic	NA	NA	NA	NA	NA
chr11	44282001	44334000	10Kb_279	DKOF_F_180	52000	306.77	657.04	Down	-1.1	1.28e-10	5.17e-09	0	0	0	0	0	OtherIntergenic	NA	NA	NA	NA	NA
chr11	87630901	87631900	1kb_782	DKOF_F_181	1000	10.32	22.19	Down	-1.1	9.41e-05	0.00256876	Lpo	NM_080420	-	87619929	87639615	Genebody	8214.5	NA	NA	NA	NA
chr11	117806001	117817000	10Kb_440	DKOF_F_182	11000	42	89.32	Down	-1.09	9.86e-12	2.67e-09	0	0	0	0	0	OtherIntergenic	NA	NA	NA	NA	NA
chr11	78172201	78174200	2kb_625	DKOF_F_183	2000	12.79	26.97	Down	-1.08	5.98e-05	0.00120383	Foxn1	NM_008238	-	78171789	78200059	Genebody	26858.5	NA	NA	NA	NA
chr11	81398201	81400200	2kb_631	DKOF_F_184	2000	11.7	24.62	Down	-1.07	3.07e-05	0.00070271	Accn1	NM_001034013	-	80693666	81781897	Genebody	382696	NA	NA	NA	NA
chr11	58415401	58417600	2kb_541	DKOF_F_185	2200	10.69	22.47	Down	-1.07	7.79e-05	0.00148193	0	0	0	0	0	OtherIntergenic	NA	NA	NA	NA	NA
chr11	75387001	75389400	2kb_617	DKOF_F_186	2400	12.6	26.31	Down	-1.06	6.67e-05	0.00131366	Slc43a2	NM_173388	+	75345211	75388542	Genebody	42989.5	NA	NA	NA	NA
chr11	68712201	68714200	2kb_590	DKOF_F_187	2000	12.52	26.03	Down	-1.06	5.71e-05	0.00116078	Rpl26	NM_009080	+	68715067	68718035	Promoter3k	-1866.5	NA	NA	NA	NA
chr11	95684001	95711000	10Kb_372	DKOF_F_188	27000	164.76	340.46	Down	-1.05	6.36e-11	3.26e-09	Abi3	NM_025659	-	95691385	95703752	Genebody	6251.5	NA	NA	NA	NA
chr11	105789201	105791200	2kb_757	DKOF_F_189	2000	14.21	29.48	Down	-1.05	1.75e-05	0.000435366	Tanc2	NM_181071	+	105451299	105790616	Genebody	338902	NA	NA	NA	NA
chr11	118616201	118618400	2kb_813	DKOF_F_190	2200	15.15	31.1	Down	-1.04	6.28e-06	0.000182441	D11Bwg0517e	NM_001024931	-	118351073	118770885	Genebody	153584	NA	NA	NA	NA
chr11	70031001	70053000	10Kb_321	DKOF_F_191	22000	131.42	266.53	Down	-1.02	2.65e-11	2.67e-09	Bcl6b	NM_007528	-	70037629	70043222	Promoter3k	1221.5	NA	NA	NA	NA
chr11	63736201	63739000	2kb_584	DKOF_F_192	2800	17.34	35.25	Down	-1.02	3.28e-06	0.000104011	Hs3st3b1	NM_018805	-	63698194	63735785	Promoter3k	-1815.5	NA	NA	NA	NA
chr11	3221001	3244000	10Kb_248	DKOF_F_193	23000	125.55	252.61	Down	-1.01	3.94e-11	2.72e-09	Pik3ip1	NM_178149	+	3230733	3242973	Promoter3k	1767.5	NA	NA	NA	NA
chr11	115608801	115611400	2kb_792	DKOF_F_194	2600	15.21	30.74	Down	-1.01	0.000118276	0.00212228	0	0	0	0	0	OtherIntergenic	NA	NA	NA	NA	NA
chr11	57603201	57605600	2kb_539	DKOF_F_195	2400	12.34	24.89	Down	-1.01	8.5e-05	0.00158961	0	0	0	0	0	OtherIntergenic	NA	NA	NA	NA	NA
chr11	32121001	32123600	2kb_492	DKOF_F_196	2600	18.79	37.62	Down	-1	0.000157784	0.00278551	Rhbdf1	NM_010117	-	32109585	32122292	ProximalPromoter	-8.5	NA	NA	NA	NA
chr11	113491001	113493400	2kb_783	DKOF_F_197	2400	14.18	28.27	Down	-1	0.000994546	0.0171487	0	0	0	0	0	OtherIntergenic	NA	NA	NA	NA	NA
chr11	88961801	88964200	2kb_673	DKOF_F_198	2400	12.81	25.68	Down	-1	9.16e-05	0.00168901	0	0	0	0	0	OtherIntergenic	NA	NA	NA	NA	NA
chr11	67631401	67633400	2kb_586	DKOF_F_199	2000	28.6	14.09	Up	1.02	2.84e-05	0.00065965	0	0	0	0	0	OtherIntergenic	NA	NA	NA	NA	NA
chr11	102236201	102238200	2kb_742	DKOF_F_200	2000	30.78	14.86	Up	1.05	8.23e-06	0.000230204	0	0	0	0	0	OtherIntergenic	NA	NA	NA	NA	NA
chr11	113898201	113900200	2kb_784	DKOF_F_201	2000	24.65	11.8	Up	1.06	6.46e-05	0.00128007	Sdk2	NM_172800	-	113642103	113927264	Genebody	28063.5	NA	NA	NA	NA
chr11	83660001	83674000	10Kb_345	DKOF_F_202	14000	187.45	89.15	Up	1.07	7.16e-10	2.37e-08	Hnf1b	NM_009330	+	83664370	83719316	Promoter3k	2630.5	NA	NA	NA	NA
chr11	34308601	34310800	2kb_498	DKOF_F_203	2200	27.58	13.14	Up	1.07	0.000160807	0.00283682	Fam196b	NM_001025382	+	34214821	34322639	Genebody	94879.5	NA	NA	NA	NA
chr11	96451801	96453800	2kb_693	DKOF_F_204	2000	26.77	12.6	Up	1.09	4.83e-05	0.00101757	Skap1	NM_001033186	+	96325937	96620935	Genebody	126864	NA	NA	NA	NA
chr11	71454601	71457000	2kb_609	DKOF_F_205	2400	30.95	14.26	Up	1.12	5.46e-05	0.00112092	0	0	0	0	0	OtherIntergenic	NA	NA	NA	NA	NA
chr11	71308601	71310600	2kb_608	DKOF_F_206	2000	24.27	11.12	Up	1.13	6.44e-05	0.00127675	0	0	0	0	0	OtherIntergenic	NA	NA	NA	NA	NA
chr11	11563001	11565000	2kb_474	DKOF_F_207	2000	27.1	12.19	Up	1.15	8.42e-06	0.000234586	0	0	0	0	0	OtherIntergenic	NA	NA	NA	NA	NA
chr11	4016001	4019400	2kb_465	DKOF_F_208	3400	56.39	24.02	Up	1.23	6.1e-10	5.04e-08	Sec14l2	NM_144520	-	3997042	4018731	Promoter3k	1030.5	NA	NA	NA	NA
chr11	33876801	33878800	2kb_496	DKOF_F_210	2000	24.74	10.44	Up	1.25	7.19e-06	0.000205685	0	0	0	0	0	OtherIntergenic	NA	NA	NA	NA	NA
chr11	53276601	53278600	2kb_528	DKOF_F_211	2000	33.69	14.07	Up	1.26	2.75e-06	8.93e-05	Shroom1	NM_027917	+	53270706	53281256	Genebody	6894.5	NA	NA	NA	NA
chr11	82016401	82017600	1kb_749	DKOF_F_212	1200	18.12	7.54	Up	1.27	0.000101251	0.00271981	0	0	0	0	0	OtherIntergenic	NA	NA	NA	NA	NA
chr11	96447401	96448800	1kb_827	DKOF_F_213	1400	18.54	7.61	Up	1.28	4.12e-05	0.00136338	Skap1	NM_001033186	+	96325937	96620935	Genebody	122164	NA	NA	NA	NA
chr11	82936501	82937500	1kb_753	DKOF_F_214	1000	16.64	6.71	Up	1.31	8.91e-05	0.00245704	Slfn1	NM_011407	+	82930346	82936160	Genebody	6654.5	NA	NA	NA	NA
chr11	81959701	81960800	1kb_748	DKOF_F_215	1100	16.62	6.41	Up	1.37	3.35e-05	0.00115156	0	0	0	0	0	OtherIntergenic	NA	NA	NA	NA	NA
chr11	40578601	40579700	1kb_616	DKOF_F_216	1100	19.12	7.31	Up	1.39	1.89e-05	0.00071632	0	0	0	0	0	Genedesert	NA	NA	NA	NA	NA
chr11	78311001	78316000	5kb_459	DKOF_F_217	5000	69.61	26.18	Up	1.41	2.28e-12	3.02e-09	Vtn	NM_011707	+	78312621	78315826	Promoter1k	879.5	NA	NA	NA	NA
chr11	101055801	101058000	2kb_734	DKOF_F_218	2200	26.89	9.67	Up	1.48	6.09e-08	2.92e-06	Ezh1	NM_007970	-	101052429	101087763	Genebody	30862.5	NA	NA	NA	NA
chr11	75730701	75731800	1kb_736	DKOF_F_219	1100	15.55	5.27	Up	1.56	4.25e-05	0.00140069	0	0	0	0	0	OtherIntergenic	NA	NA	NA	NA	NA
chr11	83560401	83563400	2kb_636	DKOF_F_220	3000	41.29	13.22	Up	1.64	3.55e-10	3.1e-08	1100001G20Rik	NM_183249	+	83560441	83566147	Promoter3k	1459.5	NA	NA	NA	NA
chr11	83511801	83513100	1kb_755	DKOF_F_222	1300	17.93	4.99	Up	1.84	8.52e-07	4.85e-05	0	0	0	0	0	OtherIntergenic	NA	NA	NA	NA	NA
chr12	114389301	114391600	1kb_1129	DKOF_F_223	2300	9.84	43.39	Down	-2.14	2.43e-10	3.59e-08	Crip1	NM_007763	+	114390222	114392089	ProximalPromoter	228.5	NA	NA	NA	NA
chr12	101405801	101407300	1kb_1094	DKOF_F_224	1500	4.77	16.84	Down	-1.82	3.28e-07	2.11e-05	0	0	0	0	0	OtherIntergenic	NA	NA	NA	NA	NA
chr12	104945401	104946400	1kb_1105	DKOF_F_225	1000	3.7	11.87	Down	-1.68	8.18e-05	0.00232661	0	0	0	0	0	OtherIntergenic	NA	NA	NA	NA	NA
chr12	87971301	87972300	1kb_1089	DKOF_F_226	1000	4.41	13.35	Down	-1.6	7.74e-05	0.00222698	0	0	0	0	0	OtherIntergenic	NA	NA	NA	NA	NA
chr12	101766701	101767800	1kb_1095	DKOF_F_227	1100	4.29	12.77	Down	-1.57	0.000115759	0.00309083	0	0	0	0	0	OtherIntergenic	NA	NA	NA	NA	NA
chr12	72677301	72678300	1kb_1044	DKOF_F_228	1000	5.85	16.57	Down	-1.5	4.56e-05	0.00148417	0	0	0	0	0	OtherIntergenic	NA	NA	NA	NA	NA
chr12	12802801	12803800	1kb_988	DKOF_F_229	1000	4.48	12.5	Down	-1.48	8.81e-05	0.0024413	0	0	0	0	0	OtherIntergenic	NA	NA	NA	NA	NA
chr12	86815001	86817000	2kb_925	DKOF_F_230	2000	10.6	29.01	Down	-1.45	2.51e-05	0.00059339	Fos	NM_010234	+	86814850	86818218	Promoter3k	1150.5	NA	NA	NA	NA
chr12	73460701	73461800	1kb_1046	DKOF_F_231	1100	6.39	17.36	Down	-1.44	6.28e-05	0.00189571	Rtn1	NM_153457	-	73312738	73509925	Genebody	48674.5	NA	NA	NA	NA
chr12	4080401	4083400	2kb_830	DKOF_F_232	3000	11.8	27.74	Down	-1.23	6.06e-06	0.000177166	Dnajc27	NM_153082	+	4082611	4110601	Promoter1k	-710.5	NA	NA	NA	NA
chr12	114386001	114388000	2kb_969	DKOF_F_233	2000	8.96	20.83	Down	-1.22	4.57e-05	0.000972327	0	0	0	0	0	OtherIntergenic	NA	NA	NA	NA	NA
[truncated: 845 more rows]

## Sheet: S6D_MF-DKO H3K27me3
S6D Table - Differential H3K27me3 sites in autosomes identified by diffReps comparing E1/E2-KO males to E1/E2-KO females. See Table S6A for details.
[truncated: 64 more rows]

[truncated: 9 more sheets: S6E Sex-biased H3K27ac, S6F MDKO H3K27ac, S6-G FDKO H3K27ac, S6H MFDKO H3K27ac, S6I Sex-biased H3K4me1, S6J DKOM H3K4me1, S6K DKOF H3K4me1, S6L DKOMF H3K4me1, S6M_Histone marks summary]
